# Supplementary material for: Synthesis and stabilities of peptide-based [1]rotaxanes: molecular grafting onto lasso peptide scaffolds
Source: PubMed Central journal article supplement — Chem Sci. 2017 Jan 26;8(4):2878–84. doi: 10.1039/c7sc00021a (PMC5427998; doi:10.1039/c7sc00021a), 2017-01-26

*Supporting Information*

**Synthesis and Stabilities of Peptide-based [1]Rotaxanes: Molecular Grafting onto  
Lasso Peptide Scaffolds**

*Fumito Saito<sup>1</sup> and Jeffrey W. Bode<sup>1\*</sup>*

<sup>1</sup>Laboratorium für Organische Chemie, Department of Chemistry and Applied Biosciences,  
ETH-Zürich, 8093 Zürich, Switzerland

bode@org.chem.ethz.ch

## Table of Contents

|                                                                                                     |     |
|-----------------------------------------------------------------------------------------------------|-----|
| 1. General Methods .....                                                                            | S3  |
| 2. A feasibility study for the formation of a [2]rotaxane with the KAT-azide coupling reaction..... | S5  |
| 3. X ray structure of [2]rotaxane <b>S9-PF<sub>6</sub></b> .....                                    | S9  |
| 4. Synthesis of lasso peptide <b>L1</b> .....                                                       | S13 |
| 5. Synthesis of branched-cyclic peptide <b>B1</b> .....                                             | S25 |
| 6. Comparison of NMR spectra of <b>L1</b> and <b>B1</b> .....                                       | S29 |
| 7. Synthesis of lasso peptide <b>L2</b> .....                                                       | S29 |
| 8. Synthesis of branched-cyclic peptide <b>B2</b> .....                                             | S38 |
| 9. Synthesis of lasso peptide <b>L3</b> .....                                                       | S41 |
| 10. Synthesis of branched-cyclic peptide <b>B3</b> .....                                            | S46 |
| 11. Comparison of HPLC retention time .....                                                         | S49 |
| 12. Syntheses of lasso peptides with other peptide sequences .....                                  | S50 |
| 13. Synthesis of cyclic peptide <b>C1</b> .....                                                     | S66 |
| 14. Thermal stability assay .....                                                                   | S69 |
| 15. Chymotrypsin assay .....                                                                        | S71 |
| 16. Trypsin assay.....                                                                              | S78 |
| 17. Proteinase K assay.....                                                                         | S86 |
| 18. Serum stability assay .....                                                                     | S96 |
| 19. References.....                                                                                 | S98 |
| 20. NMR spectra and HRMS data .....                                                                 | S99 |

## 1. General Methods

### 1.1. Reactions and purifications

Reactions were carried out under air otherwise stated. Thin layer chromatography (TLC) was performed on Merck TLC plates (0.25 mm) pre-coated with silica gel 60 F254 and visualized by UV quenching and/or staining with ninhydrin solution and warming with a heat gun. Flash column chromatography was performed under a forced-flow of air using Silicycle SiliaFlash F60 (40-63 mm particle size). Peptides were analyzed and purified by reversed phase high performance liquid chromatography (RP-HPLC) on Jasco analytical and preparative instruments with dual pumps, mixer and in-line degasser, a variable wavelength UV detector (simultaneous monitoring of the eluent at 220 nm, 254 nm, 301 nm) and a Rheodyne 7725i injector fitted with a 20 to 1000  $\mu$ L injection loop. The mobile phase for analytical and preparative HPLC were Millipore-H<sub>2</sub>O with 0.1% TFA (Buffer A) and HPLC grade CH<sub>3</sub>CN with 0.1% TFA (Buffer B). Analytical HPLC was performed on Shiseido C18 (5  $\mu$ m, 4.6 mm I.D. x 250 mm) column at a flow rate of 1 mL/min. Analytical HPLC traces ( $\lambda$  = 220 nm) used for reaction monitoring were obtained with the following method: 20 to 95% CH<sub>3</sub>CN with 0.1% TFA in 17 min, then 95% CH<sub>3</sub>CN with 0.1% TFA for 7 min. Preparative HPLC was performed on YMC C18 (5  $\mu$ m, 20 mm I.D. x 250 mm) column at a flow rate of 10 mL/min. LCMS analysis was performed on Dionex UltiMate 3000 RSLC connected to a Surveyor MSQ Plus mass spectrometer; a reversed-phase RESTEK Pinnacle II C18 (4.6 x 50 mm) column was used, running a gradient of 5 to 100% CH<sub>3</sub>CN in H<sub>2</sub>O over 4.5 min, 100% CH<sub>3</sub>CN for 2.5 min.

### 1.2. Characterization

NMR spectra were recorded on a Bruker AV-400, AV-III-600. Chemical shifts ( $\delta$ ) are given in ppm relative to residual solvent peaks. Data for <sup>1</sup>H NMR are reported as follows: chemical shift (multiplicity, coupling constants where applicable, number of hydrogens). Abbreviations are as follows: s (singlet), d (doublet), t (triplet), q (quartet), p (pentet), dd (doublet of doublet), m (multiplet), br (broad). In <sup>19</sup>F and <sup>11</sup>B NMR, multiplets are reported as the average of the observed signals. IR spectra were recorded on a Jasco FT/IR-4100 spectrometer and only major peaks are reported in frequency of absorption (cm<sup>-1</sup>). Optical rotations were measured on a Jasco P-2000 operating at the sodium D line with a 100 mm path length cell. High-resolution mass spectra were obtained by the mass spectrometry service of the ETH Zürich Laboratorium für Organische Chemie on a Bruker Daltonics maXis ESI-QTOF spectrometer (ESI), or a Bruker Daltonics solariX spectrometer (MALDI). Analytical HPLC traces ( $\lambda$  = 220 nm) used to confirm the purity of peptides were obtained with the following method: 20 to 95% CH<sub>3</sub>CN with 0.1% TFA in 17 min, then 95% CH<sub>3</sub>CN with 0.1% TFA for 7 min.

### 1.3. Solvents and reagents

All organic solvents (acetone, CH<sub>3</sub>CN, CHCl<sub>3</sub>, CH<sub>2</sub>Cl<sub>2</sub>, DMF, DMSO, Et<sub>2</sub>O, MeOH) were used as supplied (ACS or HPLC grade) otherwise stated. THF was purified by distillation from sodium benzophenone ketyl prior to use. H<sub>2</sub>O used for reactions was obtained from Millipore purification system. Potassium acyltrifluoroborates<sup>1</sup> and protected leucine  $\alpha$ -ketoacid resin **S1**<sup>2</sup> were prepared by reported procedures. All other starting materials were used as supplied by commercial vendors or prepared by the method described in the corresponding reference.

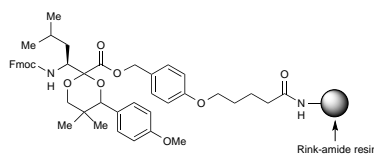

**S1**

### 1.4. Solid phase peptide synthesis

The following Fmoc amino acids and Boc amino acid with side-chain protecting groups were used: Fmoc-Ala-OH, Fmoc-Arg(Pbf)-OH, Fmoc-Asn(Trt)-OH, Fmoc-Cys(Trt)-OH, Fmoc-Gly-OH, Fmoc-His(1-Trt)-OH, Fmoc-Leu-OH, Fmoc-Lys(Boc)-OH, Fmoc-Nle-OH, Fmoc-Phe-OH, Fmoc-Ser(tBu)-OH, Fmoc-Thr(tBu)-OH, Fmoc-Trp(Boc)-OH, Fmoc-D-Trp(Boc)-OH, Fmoc-Tyr(tBu)-OH, Boc-Cys(StBu)-OH. SPPS was performed on rink-amide polystyrene resin. Fmoc deprotections were performed with 20% piperidine in DMF (7 min x 2). Couplings were performed with Fmoc (or Boc) amino acid (4.0 equiv to resin substitution), HCTU (4.0 equiv) and NMM (8.0 equiv) in DMF for 2 h.

## 2. A feasibility study for the formation of a [2]rotaxane with the KAT-azide coupling reaction

a)

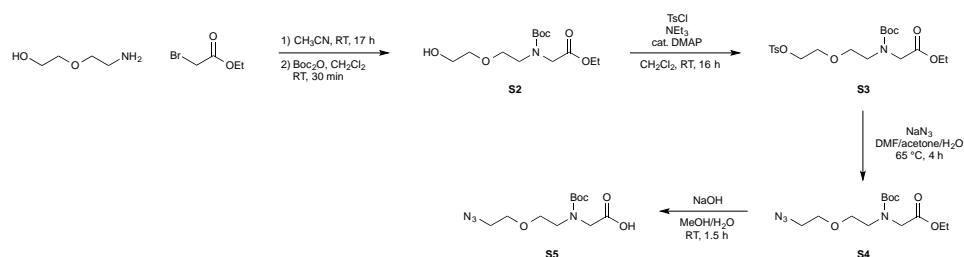

b)

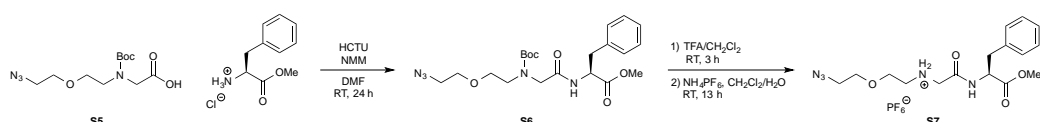

c)

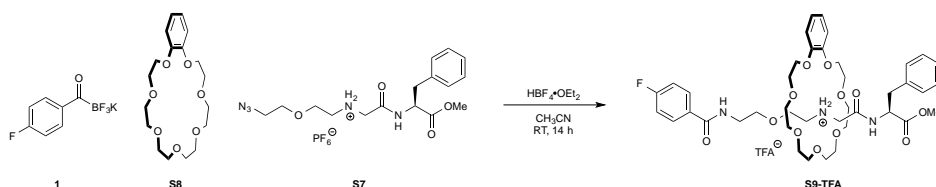

**Scheme S1.** Initial feasibility study for the formation of [2]rotaxane **S9-TFA**.

### Alcohol **S2**

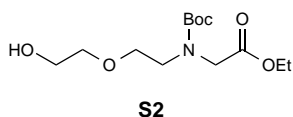

To a solution of 2-(2-aminoethoxy)ethanol (27.2 mL, 270 mmol, 3.0 equiv) in  $\text{CH}_3\text{CN}$  (120 mL) was added ethyl bromoacetate (10.0 mL, 90.0 mmol, 1.0 equiv). The mixture was stirred at RT for 17 h and  $\text{CH}_3\text{CN}$  was evaporated under reduced pressure. The residue was dissolved in  $\text{CH}_2\text{Cl}_2$  and washed with  $\text{H}_2\text{O}$  (3x). The combined aqueous phases were back-extracted with  $\text{CH}_2\text{Cl}_2$  (1x). The combined organic phases were dried over  $\text{Na}_2\text{SO}_4$ , filtered and concentrated under reduced pressure.

The residual oil was dissolved in  $\text{CH}_2\text{Cl}_2$  (250 mL) and  $\text{Boc}_2\text{O}$  (19.6 g, 90 mmol, 1.0 equiv to ethyl bromoacetate) was added to this solution. The mixture was stirred at RT for 30 min and  $\text{CH}_2\text{Cl}_2$  was evaporated under reduced pressure. The residue was purified by flash column chromatography (hexanes/ $\text{EtOAc}$  1:2) to give **S2** (4:6 rotamers by  $^1\text{H}$  NMR integration, 5.8 g, 34% yield over 2 steps) as a colorless oil.

$^1\text{H}$  NMR (400 MHz,  $\text{CDCl}_3$ )  $\delta$  4.19-4.13 (m, 2H), 4.01 (s, 2H x 0.4), 3.94 (s, 2H x 0.6), 3.68-3.64 (m, 2H), 3.61-3.56 (m, 2H), 3.52-3.42 (m, 4H), 2.41 (br s, 1H), 1.44-1.40 (m, 9H), 1.27-1.22 (m, 3H).

$^{13}\text{C}$  NMR (100 MHz,  $\text{CDCl}_3$ )  $\delta$  170.50, 170.31, 155.41, 155.25, 80.30, 72.32, 70.24, 70.16, 61.62,

61.58, 60.96, 50.66, 50.03, 48.47, 48.20, 28.30, 28.15, 27.35, 14.19, 14.08.

**IR** (thin film) 3480, 2978, 2935, 2873, 1752, 1701, 1458, 1401, 1367, 1250, 1198, 1172, 1144  $\text{cm}^{-1}$ .

**HRMS** (ESI) calcd for  $\text{C}_{13}\text{H}_{25}\text{NNaO}_6$   $[\text{M}+\text{Na}]^+$ : 314.1574, found: 314.1575.

### Tosylate **S3**

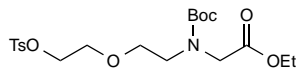

**S3**

To a solution of **S2** (2.0 g, 6.9 mmol, 1.0 equiv) in  $\text{CH}_2\text{Cl}_2$  were added  $\text{NEt}_3$  (1.15 mL, 8.3 mmol, 1.2 equiv), DMAP (8.4 mg, 69  $\mu\text{mol}$ , 0.01 equiv) followed by  $\text{TsCl}$  (1.6 g, 8.3 mmol, 1.2 equiv). The mixture was stirred at RT for 16 h and  $\text{CH}_2\text{Cl}_2$  was evaporated under reduced pressure. The residue was purified by flash column chromatography (hexanes/EtOAc 3:1 to 2:1) to give **S3** (4:6 rotamers by  $^1\text{H}$  NMR integration, 2.6 g, 84% yield) as a colorless oil.

**$^1\text{H}$  NMR** (400 MHz,  $\text{CDCl}_3$ )  $\delta$  7.80-7.78 (m, 2H), 7.34 (d,  $J = 8.0$  Hz, 2H), 4.19-4.14 (m, 2H), 4.13-4.09 (m, 2H), 3.95 (s, 2H x 0.4), 3.90 (s, 2H x 0.6), 3.61-3.56 (m, 2H), 3.54-3.50 (m, 2H), 3.42-3.35 (m, 2H), 2.44 (s, 3H), 1.44-1.41 (m, 9H), 1.29-1.24 (m, 3H).

**$^{13}\text{C}$  NMR** (100 MHz,  $\text{CDCl}_3$ )  $\delta$  170.22, 170.09, 155.40, 155.20, 144.85, 144.80, 133.00, 132.93, 129.82, 129.80, 127.91, 80.31, 80.23, 70.67, 70.62, 69.02, 68.47, 68.32, 60.88, 60.83, 50.59, 49.85, 48.15, 47.87, 28.32, 28.18, 21.61, 14.27, 14.16.

**IR** (thin film) 2978, 1750, 1699, 1365, 1190, 1177, 1142  $\text{cm}^{-1}$ .

**HRMS** (ESI) calcd for  $\text{C}_{20}\text{H}_{32}\text{NO}_8\text{S}$   $[\text{M}+\text{H}]^+$ : 446.1843, found: 446.1839.

### Azide-ethyl ester **S4**

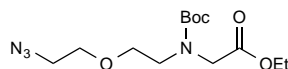

**S4**

To a solution of **S3** (3.7 g, 8.3 mmol, 1.0 equiv) in DMF/acetone/ $\text{H}_2\text{O}$  (36 mL, 1:1:1) was added  $\text{NaN}_3$  (0.81 g, 12 mmol, 1.5 equiv). The mixture was stirred at 65  $^\circ\text{C}$  for 4 h and cooled to RT. The mixture was diluted with  $\text{CH}_2\text{Cl}_2$  and washed with  $\text{H}_2\text{O}$  (3x), then brine (1x). The organic phase was dried over  $\text{Na}_2\text{SO}_4$ , filtered and concentrated under reduced pressure. The residue was purified by flash column chromatography (hexanes/EtOAc 3:1) to give **S4** (4:6 rotamers by  $^1\text{H}$  NMR integration, 2.3 g, 88% yield) as a pale yellow oil.

**$^1\text{H}$  NMR** (400 MHz,  $\text{CDCl}_3$ )  $\delta$  4.21-4.14 (m, 2H), 4.05 (s, 2H x 0.4), 3.98 (s, 2H x 0.6), 3.64-3.58 (m, 4H), 3.52-3.44 (m, 2H), 3.35-3.31 (m, 2H), 1.46-1.42 (m, 9H), 1.29-1.24 (m, 3H).

**$^{13}\text{C}$  NMR** (100 MHz,  $\text{CDCl}_3$ )  $\delta$  170.29, 170.15, 155.45, 155.24, 80.31, 80.23, 70.65, 70.52, 69.90, 69.79, 60.89, 60.82, 50.74, 50.71, 49.95, 48.37, 48.14, 28.35, 28.20, 14.27, 14.15.

**IR** (thin film) 2979, 2110, 1751, 1701, 1249, 1197, 1171, 1142  $\text{cm}^{-1}$ .

**HRMS** (ESI) calcd for  $\text{C}_{13}\text{H}_{24}\text{N}_4\text{NaO}_5$   $[\text{M}+\text{Na}]^+$ : 339.1639, found: 339.1635.

**Azide-acid S5**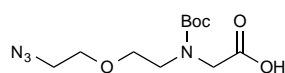**S5**

To a solution of **S4** (2.3 g, 7.3 mmol, 1.0 equiv) in MeOH (22 mL) was added 1 M aq NaOH (11 mL, 11 mmol, 1.5 equiv). The mixture was stirred at RT for 1.5 h and diluted with CH<sub>2</sub>Cl<sub>2</sub> and H<sub>2</sub>O. The aqueous phase was acidified with 1 M aq HCl to pH 2 and extracted with CH<sub>2</sub>Cl<sub>2</sub> (3x). The combined organic phases were dried over Na<sub>2</sub>SO<sub>4</sub>, filtered and concentrated under reduced pressure to give **S5** (4:6 rotamers by <sup>1</sup>H NMR integration, 1.7 g, 81% yield) as a colorless oil.

<sup>1</sup>H NMR (400 MHz, CDCl<sub>3</sub>) δ 9.83 (br s, 1H), 4.09 (s, 2H x 0.4), 4.04 (s, 2H x 0.6), 3.65-3.58 (m, 4H), 3.53-3.46 (m, 2H), 3.36-3.33 (m, 2H), 1.46-1.42 (m, 9H).

<sup>13</sup>C NMR (100 MHz, CDCl<sub>3</sub>) δ 175.60, 175.25, 155.68, 155.12, 80.83, 80.78, 70.57, 70.45, 69.91, 69.80, 50.71, 50.66, 50.63, 50.03, 48.55, 48.29, 28.30, 28.14.

IR (thin film) 2979, 2934, 2111, 1729, 1699, 1251, 1170, 1146, 1127 cm<sup>-1</sup>.

HRMS (ESI) calcd for C<sub>11</sub>H<sub>20</sub>N<sub>4</sub>NaO<sub>5</sub> [M+Na]<sup>+</sup>: 311.1326, found: 311.1327.

**Azide-Phe methyl ester S6**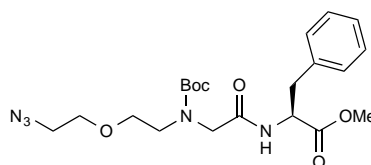**S6**

To a solution of **S5** (1.0 g, 3.5 mmol, 1.0 equiv) in DMF (6.0 mL) were added HCTU (1.6 g, 3.9 mmol, 1.1 equiv), NMM (1.2 mL, 11 mmol, 3.0 equiv) followed by L-phenylalanine methyl ester hydrochloride (0.69 g, 3.9 mmol, 1.1 equiv). The mixture was stirred at RT for 24 h and diluted with CH<sub>2</sub>Cl<sub>2</sub>. The organic solution was washed with H<sub>2</sub>O/brine (1:1, 3x), dried over Na<sub>2</sub>SO<sub>4</sub>, filtered and concentrated under reduced pressure. The residue was purified by flash column chromatography (hexanes/EtOAc 1:1) to give **S6** (1.0 g, 64% yield) as a yellow oil.

<sup>1</sup>H NMR (400 MHz, CDCl<sub>3</sub>) δ 7.30-7.20 (m, 3H), 7.13-7.10 (m, 2H), 6.76 (d, *J* = 7.9 Hz, 1H), 4.90-4.88 (m, 1H), 3.95-3.88 (m, 2H), 3.70 (s, 3H), 3.61-3.48 (m, 4H), 3.43 (m, 2H), 3.34-3.26 (m, 2H), 3.16-3.06 (m, 2H), 1.46-1.40 (m, 9H).

<sup>13</sup>C NMR (100 MHz, CDCl<sub>3</sub>) δ 171.72, 169.49, 155.11, 135.90, 129.17, 128.57, 127.06, 80.94, 69.43, 69.16, 52.96, 52.20, 50.53, 48.39, 48.11, 37.95, 28.18.

[α]<sub>D</sub><sup>25</sup> = +19.3° (c 3.4, CHCl<sub>3</sub>)

IR (thin film) 2976, 2932, 2869, 2108, 1746, 1699, 1525, 1456, 1366, 1248, 1173, 1144 cm<sup>-1</sup>.

HRMS (ESI) calcd for C<sub>21</sub>H<sub>32</sub>N<sub>5</sub>O<sub>6</sub> [M+H]<sup>+</sup>: 450.2347, found: 450.2347.

**Azide-Phe PF<sub>6</sub> salt S7**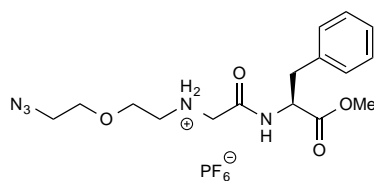**S7**

To a solution of **S6** (1.0 g, 2.2 mmol, 1.0 equiv) in CH<sub>2</sub>Cl<sub>2</sub> (4.0 mL) was added TFA (2.0 mL). The mixture was stirred at RT for 3 h and basified with sat aq Na<sub>2</sub>CO<sub>3</sub>. The aqueous phase was extracted with CH<sub>2</sub>Cl<sub>2</sub> (3x). The combined organic phases were dried over Na<sub>2</sub>SO<sub>4</sub>, filtered and concentrated under reduced pressure.

The residue was redissolved in TFA (3.0 mL), and TFA was co-evaporated with CH<sub>2</sub>Cl<sub>2</sub> (5x) under reduced pressure. To the resulting oil were added CH<sub>2</sub>Cl<sub>2</sub>/H<sub>2</sub>O (30 mL, 2:1) and NH<sub>4</sub>PF<sub>6</sub> (1.8 g, 11 mmol, 5.0 equiv). The biphasic mixture was vigorously stirred at RT for 13 h and two phases were separated. The aqueous phase was extracted with CH<sub>2</sub>Cl<sub>2</sub> (3x). The combined organic phases were dried over Na<sub>2</sub>SO<sub>4</sub>, filtered and concentrated under reduced pressure to give **S7** (0.40 g, 37% yield over 2 steps) as a pale yellow amorphous.

<sup>1</sup>H NMR (400 MHz, CDCl<sub>3</sub>) δ 7.42 (br s, 2H), 7.29-7.25 (m, 2H), 7.22-7.13 (m, 4H), 4.83-4.76 (m, 1H), 3.98 (d, *J* = 16.1 Hz, 1H), 3.86 (d, *J* = 16.1 Hz, 1H), 3.72 (t, *J* = 5.1 Hz, 2H), 3.67 (s, 3H), 3.61 (t, *J* = 4.9 Hz, 2H), 3.38-3.36 (m, 2H), 3.30-3.18 (m, 2H), 3.13 (dd, *J* = 14.2, 5.7 Hz, 1H), 2.97 (dd, *J* = 13.8, 7.7 Hz, 1H).

<sup>13</sup>C NMR (100 MHz, CDCl<sub>3</sub>) δ 171.67, 164.65, 135.63, 129.26, 128.66, 127.18, 69.78, 65.18, 54.27, 52.73, 50.43, 48.48, 48.35, 37.60.

[α]<sub>D</sub><sup>25</sup> = +18.7° (c 1.0, CHCl<sub>3</sub>)

IR (thin film) 3032, 2957, 2110, 1739, 1677, 1550, 1441, 1128, 842 cm<sup>-1</sup>.

HRMS (ESI) calcd for C<sub>16</sub>H<sub>24</sub>N<sub>5</sub>O<sub>4</sub> [M+H-PF<sub>6</sub>]<sup>+</sup>: 350.1823, found: 350.1819.

**[2]Rotaxane S9-TFA**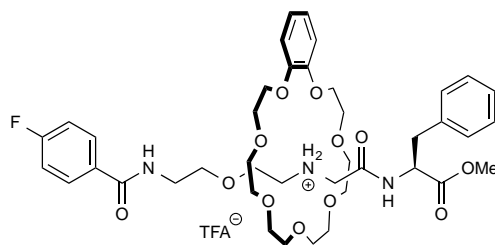**S9-TFA**

4-Fluorophenyl KAT **1**<sup>3</sup> (84 mg, 0.36 mmol, 1.0 equiv), B21C7 **S8**<sup>4</sup> (0.13 g, 0.36 mmol, 1.0 equiv), and **S7** (0.18 g, 0.36 mmol, 1.0 equiv) were dissolved in CH<sub>3</sub>CN (1.8 mL), and HBF<sub>4</sub>•OEt<sub>2</sub> (98 μL, 0.72 mmol, 2.0 equiv) was added. The mixture was stirred at RT for 14 h. The reaction was quenched with H<sub>2</sub>O. The crude material was purified by preparative HPLC using a YMC C18



column with a gradient of 20 to 95% CH<sub>3</sub>CN with 0.1% TFA in 28 min. The pure product fractions were pooled and lyophilized to obtain 61 mg of **S9-TFA** (18% yield).

**<sup>1</sup>H NMR** (400 MHz, CDCl<sub>3</sub>) δ 7.96 (br m, 2H), 7.86-7.81 (m, 2H), 7.49 (t, *J* = 5.5 Hz, 1H), 7.24-7.15 (m, 3H), 7.10 (dd, *J* = 7.5, 1.8 Hz, 3H), 7.01 (t, *J* = 8.6 Hz, 2H), 6.91-6.87 (m, 2H), 6.83-6.79 (m, 2H), 4.76 (m, 1H), 4.40-4.21 (m, 2H), 4.18-4.13 (m, 2H), 4.07-4.04 (m, 2H), 3.88-3.83 (m, 2H), 3.68 (s, 3H), 3.67-3.39 (m, 26H), 3.15 (dd, *J* = 14.1, 5.4 Hz, 1H), 2.95 (dd, *J* = 14.1, 8.4 Hz, 1H).

**<sup>13</sup>C NMR** (100 MHz, CDCl<sub>3</sub>) δ 171.41, 166.83, 165.86, 164.55 (d, *J* = 252 Hz), 160.20 (q, *J* = 37.0 Hz), 146.74, 146.72, 136.25, 130.37 (d, *J* = 2.9 Hz), 129.51 (d, *J* = 9.0 Hz), 129.08, 128.42, 126.83, 121.56, 121.53, 116.01 (q, *J* = 289 Hz), 115.23 (d, *J* = 22.5 Hz), 111.65, 111.63, 71.21, 70.74, 70.72, 70.68, 70.61, 70.55, 69.48, 69.16, 68.08, 67.98, 65.75, 53.24, 52.33, 48.39, 47.05, 39.20, 37.22.

**<sup>19</sup>F NMR** (376 MHz, CDCl<sub>3</sub>) δ -108.71.

**[α]<sub>D</sub><sup>26</sup>** = +3.7° (c 1.6, CHCl<sub>3</sub>)

**IR** (thin film) 3068, 2905, 1742, 1691, 1504, 1250, 1200, 1118, 1104 cm<sup>-1</sup>.

**HRMS** (MALDI) calcd for C<sub>41</sub>H<sub>57</sub>FN<sub>3</sub>O<sub>12</sub> [M+H-TFA]<sup>+</sup>: 802.3921, found: 802.3917.

To obtain a PF<sub>6</sub> salt **S9-PF<sub>6</sub>**, **S9-TFA** was dissolved in CH<sub>2</sub>Cl<sub>2</sub>/H<sub>2</sub>O (6.0 mL, 2:1) and NH<sub>4</sub>PF<sub>6</sub> (0.11 g, 0.67 mmol, 10 equiv) was added. The mixture was vigorously stirred at RT for 13 h and two phases were separated. The aqueous phase was extracted with CH<sub>2</sub>Cl<sub>2</sub> (3x). The combined organic phases were dried over Na<sub>2</sub>SO<sub>4</sub>, filtered and concentrated under reduced pressure. The residue **S9-PF<sub>6</sub>** was directly used for the crystal growth (*vide infra*).

### 3. X-ray structure of [2]rotaxane **S9-PF<sub>6</sub>**

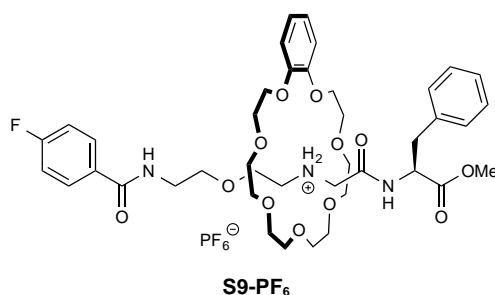

Single crystals of **S9-PF<sub>6</sub>** were obtained by slow evaporation from a solution in EtOAc/MeOH/CH<sub>2</sub>Cl<sub>2</sub> at 23 °C. A suitable crystal was selected and the sample was measured on a 'Bruker/Nonius Kappa Apex2' diffractometer. The crystal was kept at 100.0(2) K during data collection. Using Olex2<sup>5</sup>, the structure was solved with the XT<sup>6</sup> structure solution program using Direct Methods and refined with the XL<sup>7</sup> refinement package using Least Squares minimisation.

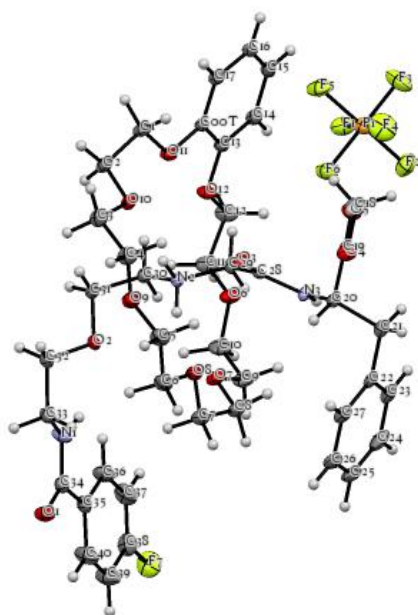

**Figure S1.** ORTEP diagram of **S9-PF<sub>6</sub>**

**Table S1** Crystal data and structure refinement for **jb040915\_1\_1\_0m**.

|                                             |                                                                                 |
|---------------------------------------------|---------------------------------------------------------------------------------|
| Identification code                         | jb040915_1_1_0m                                                                 |
| Empirical formula                           | C <sub>41</sub> H <sub>57</sub> F <sub>7</sub> N <sub>3</sub> O <sub>12</sub> P |
| Formula weight                              | 947.86                                                                          |
| Temperature/K                               | 100.0(2)                                                                        |
| Crystal system                              | monoclinic                                                                      |
| Space group                                 | P2 <sub>1</sub>                                                                 |
| a/Å                                         | 9.9986(15)                                                                      |
| b/Å                                         | 18.897(3)                                                                       |
| c/Å                                         | 12.0500(19)                                                                     |
| α/°                                         | 90                                                                              |
| β/°                                         | 91.502(6)                                                                       |
| γ/°                                         | 90                                                                              |
| Volume/Å <sup>3</sup>                       | 2276.0(6)                                                                       |
| Z                                           | 2                                                                               |
| ρ <sub>calc</sub> /cm <sup>3</sup>          | 1.383                                                                           |
| μ/mm <sup>-1</sup>                          | 0.152                                                                           |
| F(000)                                      | 996.0                                                                           |
| Crystal size/mm <sup>3</sup>                | 0.26 × 0.16 × 0.08                                                              |
| Radiation                                   | MoKα (λ = 0.71073)                                                              |
| 2θ range for data collection/°              | 5.228 to 55.088                                                                 |
| Index ranges                                | -10 ≤ h ≤ 13, -24 ≤ k ≤ 23, -15 ≤ l ≤ 15                                        |
| Reflections collected                       | 24488                                                                           |
| Independent reflections                     | 10336 [R <sub>int</sub> = 0.0319, R <sub>sigma</sub> = 0.0500]                  |
| Data/restraints/parameters                  | 10336/5/590                                                                     |
| Goodness-of-fit on F <sup>2</sup>           | 1.013                                                                           |
| Final R indexes [I ≥ 2σ (I)]                | R <sub>1</sub> = 0.0366, wR <sub>2</sub> = 0.0686                               |
| Final R indexes [all data]                  | R <sub>1</sub> = 0.0486, wR <sub>2</sub> = 0.0732                               |
| Largest diff. peak/hole / e Å <sup>-3</sup> | 0.21/-0.29                                                                      |
| Flack parameter                             | 0.06(5)                                                                         |

**Table S2** Bond Lengths for **jb040915\_1\_1\_0m**.

| Atom | Atom | Length/Å | Atom | Atom | Length/Å |
|------|------|----------|------|------|----------|
| F7   | C38  | 1.362(3) | O6   | C10  | 1.419(3) |
| O1   | C34  | 1.232(3) | O6   | C11  | 1.421(3) |

|     |     |          |      |      |            |
|-----|-----|----------|------|------|------------|
| O2  | C31 | 1.420(3) | O7   | C8   | 1.420(3)   |
| O2  | C32 | 1.427(3) | O7   | C9   | 1.418(3)   |
| O3  | C28 | 1.221(3) | O8   | C6   | 1.435(3)   |
| O4  | C18 | 1.447(3) | O8   | C7   | 1.424(3)   |
| O4  | C19 | 1.338(3) | O9   | C4   | 1.425(3)   |
| O5  | C19 | 1.201(3) | O9   | C5   | 1.425(3)   |
| N1  | C33 | 1.450(4) | O10  | C2   | 1.426(3)   |
| N1  | C34 | 1.341(3) | O10  | C3   | 1.429(3)   |
| N2  | C29 | 1.485(3) | O11  | C00T | 1.375(3)   |
| N2  | C30 | 1.491(3) | O11  | C1   | 1.428(3)   |
| N3  | C20 | 1.452(3) | O12  | C12  | 1.433(3)   |
| N3  | C28 | 1.345(3) | O12  | C13  | 1.368(3)   |
| C19 | C20 | 1.528(4) | C00T | C13  | 1.400(4)   |
| C20 | C21 | 1.523(4) | C00T | C17  | 1.383(4)   |
| C21 | C22 | 1.512(4) | C1   | C2   | 1.499(4)   |
| C22 | C23 | 1.388(4) | C3   | C4   | 1.501(4)   |
| C22 | C27 | 1.396(4) | C5   | C6   | 1.489(4)   |
| C23 | C24 | 1.381(4) | C7   | C8   | 1.489(4)   |
| C24 | C25 | 1.375(4) | C9   | C10  | 1.494(4)   |
| C25 | C26 | 1.383(4) | C11  | C12  | 1.489(4)   |
| C26 | C27 | 1.392(4) | C13  | C14  | 1.383(3)   |
| C28 | C29 | 1.514(3) | C14  | C15  | 1.392(4)   |
| C30 | C31 | 1.498(3) | C15  | C16  | 1.374(4)   |
| C32 | C33 | 1.500(4) | C16  | C17  | 1.395(4)   |
| C34 | C35 | 1.495(4) | P1   | F1   | 1.6019(17) |
| C35 | C36 | 1.387(4) | P1   | F2   | 1.6068(19) |
| C35 | C40 | 1.386(4) | P1   | F3   | 1.5872(18) |
| C36 | C37 | 1.382(4) | P1   | F4   | 1.6012(19) |
| C37 | C38 | 1.355(4) | P1   | F5   | 1.5992(19) |
| C38 | C39 | 1.371(4) | P1   | F6   | 1.5995(17) |
| C39 | C40 | 1.384(4) |      |      |            |

**Table S3 Bond Angles for jb040915\_1\_1\_0m.**

| Atom | Atom | Atom | Angle/°    | Atom | Atom | Atom | Angle/°    |
|------|------|------|------------|------|------|------|------------|
| C31  | O2   | C32  | 111.21(19) | C7   | O8   | C6   | 110.4(2)   |
| C19  | O4   | C18  | 114.5(2)   | C4   | O9   | C5   | 111.2(2)   |
| C34  | N1   | C33  | 120.3(2)   | C2   | O10  | C3   | 111.94(19) |
| C29  | N2   | C30  | 113.73(19) | C00T | O11  | C1   | 115.6(2)   |
| C28  | N3   | C20  | 118.2(2)   | C13  | O12  | C12  | 116.0(2)   |
| O4   | C19  | C20  | 110.4(2)   | O11  | C00T | C13  | 116.4(2)   |
| O5   | C19  | O4   | 124.1(2)   | O11  | C00T | C17  | 124.0(2)   |
| O5   | C19  | C20  | 125.6(2)   | C17  | C00T | C13  | 119.6(2)   |
| N3   | C20  | C19  | 109.6(2)   | O11  | C1   | C2   | 110.1(2)   |
| N3   | C20  | C21  | 110.0(2)   | O10  | C2   | C1   | 110.6(2)   |
| C21  | C20  | C19  | 111.36(19) | O10  | C3   | C4   | 108.7(2)   |
| C22  | C21  | C20  | 112.0(2)   | O9   | C4   | C3   | 108.4(2)   |
| C23  | C22  | C21  | 121.0(2)   | O9   | C5   | C6   | 109.4(2)   |
| C23  | C22  | C27  | 118.2(3)   | O8   | C6   | C5   | 110.3(2)   |
| C27  | C22  | C21  | 120.8(2)   | O8   | C7   | C8   | 110.4(2)   |
| C24  | C23  | C22  | 121.4(3)   | O7   | C8   | C7   | 110.4(2)   |
| C25  | C24  | C23  | 120.2(3)   | O7   | C9   | C10  | 110.3(2)   |
| C24  | C25  | C26  | 119.5(3)   | O6   | C10  | C9   | 109.7(2)   |
| C25  | C26  | C27  | 120.5(3)   | O6   | C11  | C12  | 109.4(2)   |
| C26  | C27  | C22  | 120.3(3)   | O12  | C12  | C11  | 108.6(2)   |
| O3   | C28  | N3   | 122.8(2)   | O12  | C13  | C00T | 116.1(2)   |

|     |     |     |            |      |     |      |            |
|-----|-----|-----|------------|------|-----|------|------------|
| O3  | C28 | C29 | 121.3(2)   | O12  | C13 | C14  | 124.3(2)   |
| N3  | C28 | C29 | 115.9(2)   | C14  | C13 | C00T | 119.6(2)   |
| N2  | C29 | C28 | 107.92(19) | C13  | C14 | C15  | 120.4(3)   |
| N2  | C30 | C31 | 109.7(2)   | C16  | C15 | C14  | 120.0(3)   |
| O2  | C31 | C30 | 107.7(2)   | C15  | C16 | C17  | 120.1(3)   |
| O2  | C32 | C33 | 108.1(2)   | C00T | C17 | C16  | 120.3(3)   |
| N1  | C33 | C32 | 111.2(2)   | F1   | P1  | F2   | 89.53(10)  |
| O1  | C34 | N1  | 121.2(3)   | F3   | P1  | F1   | 90.04(10)  |
| O1  | C34 | C35 | 120.5(2)   | F3   | P1  | F2   | 90.43(11)  |
| N1  | C34 | C35 | 118.2(2)   | F3   | P1  | F4   | 90.89(11)  |
| C36 | C35 | C34 | 123.4(3)   | F3   | P1  | F5   | 90.05(10)  |
| C40 | C35 | C34 | 118.0(2)   | F3   | P1  | F6   | 179.62(12) |
| C40 | C35 | C36 | 118.6(3)   | F4   | P1  | F1   | 178.86(12) |
| C37 | C36 | C35 | 120.5(3)   | F4   | P1  | F2   | 89.80(10)  |
| C38 | C37 | C36 | 118.9(3)   | F5   | P1  | F1   | 90.13(10)  |
| F7  | C38 | C39 | 118.5(3)   | F5   | P1  | F2   | 179.41(11) |
| C37 | C38 | F7  | 118.5(3)   | F5   | P1  | F4   | 90.53(11)  |
| C37 | C38 | C39 | 123.0(3)   | F5   | P1  | F6   | 89.92(9)   |
| C38 | C39 | C40 | 117.6(3)   | F6   | P1  | F1   | 89.58(9)   |
| C39 | C40 | C35 | 121.4(3)   | F6   | P1  | F2   | 89.59(10)  |
| C10 | O6  | C11 | 111.0(2)   | F6   | P1  | F4   | 89.49(10)  |
| C9  | O7  | C8  | 110.9(2)   |      |     |      |            |

**Table S4 Torsion Angles for jb040915\_1\_1\_0m.**

| A   | B   | C   | D   | Angle/°   | A    | B    | C    | D   | Angle/°   |
|-----|-----|-----|-----|-----------|------|------|------|-----|-----------|
| F7  | C38 | C39 | C40 | 179.8(3)  | C35  | C36  | C37  | C38 | 0.2(5)    |
| O1  | C34 | C35 | C36 | 179.7(3)  | C36  | C35  | C40  | C39 | 0.4(4)    |
| O1  | C34 | C35 | C40 | -2.0(4)   | C36  | C37  | C38  | F7  | -180.0(3) |
| O2  | C32 | C33 | N1  | -53.3(3)  | C36  | C37  | C38  | C39 | 0.3(5)    |
| O3  | C28 | C29 | N2  | -41.2(3)  | C37  | C38  | C39  | C40 | -0.4(5)   |
| O4  | C19 | C20 | N3  | 147.1(2)  | C38  | C39  | C40  | C35 | 0.1(5)    |
| O4  | C19 | C20 | C21 | -91.0(2)  | C40  | C35  | C36  | C37 | -0.5(4)   |
| O5  | C19 | C20 | N3  | -33.7(3)  | O6   | C11  | C12  | O12 | -71.4(3)  |
| O5  | C19 | C20 | C21 | 88.2(3)   | O7   | C9   | C10  | O6  | 76.2(3)   |
| N1  | C34 | C35 | C36 | -1.6(4)   | O8   | C7   | C8   | O7  | -70.6(3)  |
| N1  | C34 | C35 | C40 | 176.7(2)  | O9   | C5   | C6   | O8  | 70.5(3)   |
| N2  | C30 | C31 | O2  | -63.3(3)  | O10  | C3   | C4   | O9  | -70.0(3)  |
| N3  | C20 | C21 | C22 | -60.4(3)  | O11  | C00T | C13  | O12 | -1.9(3)   |
| N3  | C28 | C29 | N2  | 138.4(2)  | O11  | C00T | C13  | C14 | 178.0(2)  |
| C18 | O4  | C19 | O5  | 1.7(4)    | O11  | C00T | C17  | C16 | -179.1(2) |
| C18 | O4  | C19 | C20 | -179.1(2) | O11  | C1   | C2   | O10 | 71.9(3)   |
| C19 | C20 | C21 | C22 | 177.9(2)  | O12  | C13  | C14  | C15 | -178.6(2) |
| C20 | N3  | C28 | O3  | -1.4(4)   | C00T | O11  | C1   | C2  | 175.6(2)  |
| C20 | N3  | C28 | C29 | 179.0(2)  | C00T | C13  | C14  | C15 | 1.5(4)    |
| C20 | C21 | C22 | C23 | 121.7(3)  | C1   | O11  | C00T | C13 | -168.9(2) |
| C20 | C21 | C22 | C27 | -57.9(3)  | C1   | O11  | C00T | C17 | 11.3(3)   |
| C21 | C22 | C23 | C24 | 179.7(2)  | C2   | O10  | C3   | C4  | -177.8(2) |
| C21 | C22 | C27 | C26 | 179.3(2)  | C3   | O10  | C2   | C1  | 148.1(2)  |
| C22 | C23 | C24 | C25 | 1.1(4)    | C4   | O9   | C5   | C6  | -178.9(2) |
| C23 | C22 | C27 | C26 | -0.3(4)   | C5   | O9   | C4   | C3  | 177.0(2)  |
| C23 | C24 | C25 | C26 | -0.5(4)   | C6   | O8   | C7   | C8  | -174.3(2) |
| C24 | C25 | C26 | C27 | -0.5(4)   | C7   | O8   | C6   | C5  | 175.7(2)  |
| C25 | C26 | C27 | C22 | 0.9(4)    | C8   | O7   | C9   | C10 | 178.8(2)  |
| C27 | C22 | C23 | C24 | -0.7(4)   | C9   | O7   | C8   | C7  | -166.0(2) |
| C28 | N3  | C20 | C19 | -62.5(3)  | C10  | O6   | C11  | C12 | -168.4(2) |

|     |     |     |     |           |     |      |     |      |           |
|-----|-----|-----|-----|-----------|-----|------|-----|------|-----------|
| C28 | N3  | C20 | C21 | 174.8(2)  | C11 | O6   | C10 | C9   | -178.3(2) |
| C29 | N2  | C30 | C31 | 178.6(2)  | C12 | O12  | C13 | C00T | 179.2(2)  |
| C30 | N2  | C29 | C28 | 179.9(2)  | C12 | O12  | C13 | C14  | -0.7(3)   |
| C31 | O2  | C32 | C33 | 166.2(2)  | C13 | O12  | C12 | C11  | 179.3(2)  |
| C32 | O2  | C31 | C30 | 173.7(2)  | C13 | C00T | C17 | C16  | 1.2(4)    |
| C33 | N1  | C34 | O1  | 8.1(4)    | C13 | C14  | C15 | C16  | 0.3(4)    |
| C33 | N1  | C34 | C35 | -170.6(2) | C14 | C15  | C16 | C17  | -1.4(4)   |
| C34 | N1  | C33 | C32 | -176.1(2) | C15 | C16  | C17 | C00T | 0.7(4)    |
| C34 | C35 | C36 | C37 | 177.8(3)  | C17 | C00T | C13 | O12  | 177.8(2)  |
| C34 | C35 | C40 | C39 | -178.0(3) | C17 | C00T | C13 | C14  | -2.3(4)   |

## 4. Synthesis of lasso peptide L1

### 4.1. Synthesis of [2]rotaxane 4

a)

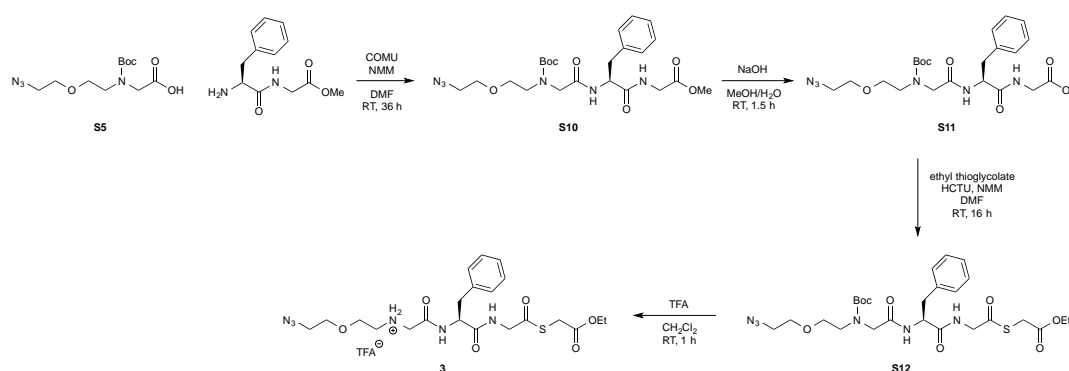

b)

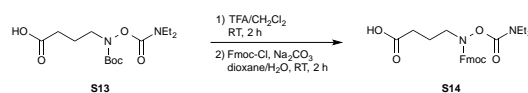

c)

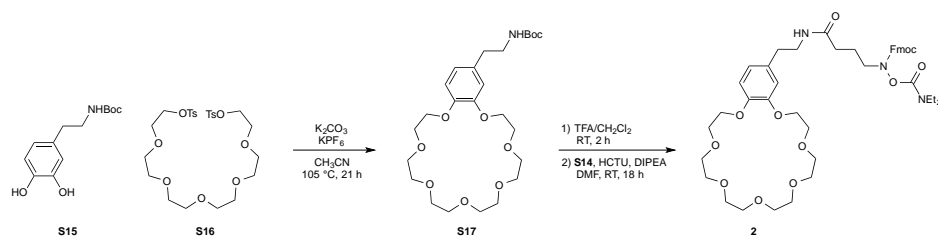

d)

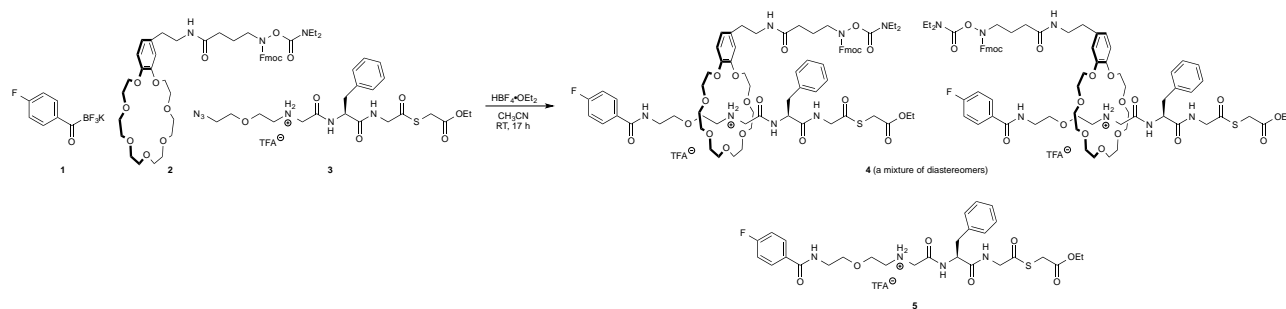

Scheme S2. Synthesis of [2]rotaxane 4

**Azide-Phe-Gly methyl ester S10**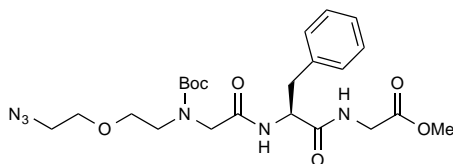**S10**

Azide-acid **S5** (1.5 g, 5.2 mmol, 1.0 equiv), COMU (2.2 g, 5.2 mmol, 1.0 equiv), and NMM (1.1 mL, 10 mmol, 2.0 equiv) were premixed in DMF (10 mL), and to this mixture was added a solution of H<sub>2</sub>N-Phe-Gly-OMe<sup>8</sup> (1.2 g, 5.2 mmol, 1.0 equiv) in DMF (5.0 mL). The mixture was stirred at RT for 36 h and diluted with CH<sub>2</sub>Cl<sub>2</sub> and H<sub>2</sub>O. The aqueous phase was acidified with 1 M aq HCl to pH 3 and extracted with CH<sub>2</sub>Cl<sub>2</sub> (3x). The combined organic phases were washed with brine, dried over Na<sub>2</sub>SO<sub>4</sub>, filtered and concentrated under reduced pressure. The residue was purified by flash column chromatography (hexanes/EtOAc 1:2) to give **S10** (2.3 g, 87% yield) as a pale yellow amorphous.

<sup>1</sup>H NMR (400 MHz, CDCl<sub>3</sub>) δ 7.28-7.24 (m, 2H), 7.21-7.18 (m, 3H), 7.03-7.00 (m, 1H), 6.76-6.65 (m, 1H), 4.75 (m, 1H), 4.01-3.84 (m, 4H), 3.68-3.67 (m, 3H), 3.57-3.30 (m, 8H), 3.11-3.09 (m, 2H), 1.39 (s, 9H).

<sup>13</sup>C NMR (100 MHz, CDCl<sub>3</sub>) δ 171.13, 169.82, 169.75, 155.98, 155.13, 136.59, 129.26, 128.61, 126.92, 81.08, 69.47, 69.26, 54.03, 53.82, 52.88, 52.20, 50.59, 48.67, 48.21, 41.15, 38.04, 37.34, 28.22.

[α]<sub>D</sub><sup>28</sup> = -22.2° (c 0.24, CHCl<sub>3</sub>)

IR (thin film) 3296, 2977, 2932, 2109, 1754, 1697, 1655, 1547, 1248, 1207, 1175 cm<sup>-1</sup>.

HRMS (ESI) calcd for C<sub>23</sub>H<sub>35</sub>N<sub>6</sub>O<sub>7</sub> [M+H]<sup>+</sup>: 507.2562, found: 507.2560.

**Azide-Phe-Gly acid S11**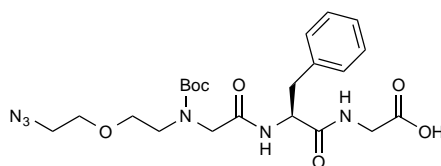**S11**

To a solution of **S10** (2.0 g, 3.9 mmol, 1.0 equiv) in MeOH (12 mL) was added 1 M aq NaOH (5.9 mL, 5.9 mmol, 1.5 equiv). The mixture was stirred at RT for 1.5 h and diluted with CH<sub>2</sub>Cl<sub>2</sub> and H<sub>2</sub>O. The aqueous phase was acidified with 1 M aq HCl to pH 2 and extracted with CH<sub>2</sub>Cl<sub>2</sub> (3x). The combined organic phases were washed with brine, dried over Na<sub>2</sub>SO<sub>4</sub>, filtered and concentrated under reduced pressure to give **S11** (1.6 g, 83% yield) as a pale yellow solid.

<sup>1</sup>H NMR (400 MHz, CD<sub>3</sub>CN) δ 7.31-7.01 (m, 7H), 4.64-4.61 (m, 1H), 3.87 (d, J = 5.6 Hz, 2H), 3.79 (s, 2H), 3.60-3.51 (m, 4H), 3.36-3.28 (m, 4H), 3.23-3.13 (m, 1H), 2.95-2.89 (m, 1H), 1.42-1.33 (m, 9H).

$^{13}\text{C}$  NMR (100 MHz,  $\text{CD}_3\text{CN}$ )  $\delta$  172.51, 171.27, 170.83, 156.88, 156.16, 138.43, 130.28, 129.35, 127.60, 81.30, 80.88, 70.19, 69.73, 55.03, 52.57, 51.43, 49.03, 48.34, 41.69, 38.60, 38.06, 28.48.

$[\alpha]_{\text{D}}^{27} = -15.8^\circ$  (c 0.23,  $\text{CHCl}_3$ )

IR (thin film) 3305, 2977, 2932, 2110, 1660, 1540, 1406, 1250, 1146  $\text{cm}^{-1}$ .

HRMS (MALDI) calcd for  $\text{C}_{22}\text{H}_{33}\text{N}_6\text{O}_7$   $[\text{M}+\text{H}]^+$ : 493.2405, found: 493.2405.

### Azide-Phe-Gly thioester **S12**

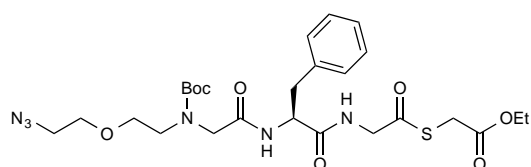

**S12**

Azide-acid **S11** (1.6 g, 3.2 mmol, 1.0 equiv), HCTU (1.3 g, 3.2 mmol, 1.0 equiv), and NMM (0.70 mL, 6.4 mmol, 2.0 equiv) were premixed in DMF (5.0 mL), and to this mixture was added ethyl thioglycolate (0.42 mL, 3.8 mmol, 1.2 equiv). The mixture was stirred at RT for 16 h and diluted with  $\text{CH}_2\text{Cl}_2$  and  $\text{H}_2\text{O}$ . The aqueous phase was extracted with  $\text{CH}_2\text{Cl}_2$  (3x). The combined organic phases were washed with  $\text{H}_2\text{O}$ /brine (1:1, 3x), dried over  $\text{Na}_2\text{SO}_4$ , filtered and concentrated under reduced pressure. The residue was purified by flash column chromatography (hexanes/EtOAc 1:2) to give **S12** (0.84 g, 44% yield) as a pale yellow amorphous.

$^1\text{H}$  NMR (400 MHz,  $\text{CD}_3\text{CN}$ )  $\delta$  7.54-7.20 (m, 6H), 6.99 (br s, 1H), 4.70-4.66 (m, 1H), 4.13 (q,  $J = 7.1$  Hz, 2H), 4.07 (d,  $J = 6.2$  Hz, 2H), 3.79 (s, 2H), 3.65 (s, 2H), 3.59-3.51 (m, 4H), 3.36-3.31 (m, 4H), 3.27-3.17 (m, 1H), 2.94 (dd,  $J = 14.2, 9.1$  Hz, 1H), 1.42-1.32 (m, 9H), 1.22 (t,  $J = 7.2$  Hz, 3H).

$^{13}\text{C}$  NMR (100 MHz,  $\text{CD}_3\text{CN}$ )  $\delta$  197.78, 172.75, 170.61, 169.39, 156.89, 156.09, 138.49, 138.24, 130.21, 129.35, 127.57, 81.25, 80.71, 70.14, 69.69, 62.45, 55.10, 52.57, 51.40, 49.59, 49.02, 48.29, 38.33, 37.71, 31.63, 28.48, 14.41.

$[\alpha]_{\text{D}}^{28} = -23.7^\circ$  (c 0.31,  $\text{CHCl}_3$ )

IR (thin film) 3289, 2977, 2932, 2108, 1697, 1657, 1542, 1298, 1249, 1170, 1146  $\text{cm}^{-1}$ .

HRMS (ESI) calcd for  $\text{C}_{26}\text{H}_{42}\text{N}_7\text{O}_8\text{S}$   $[\text{M}+\text{NH}_4]^+$ : 612.2810, found: 612.2812.

### Azide-Phe-Gly thioester TFA salt **3**

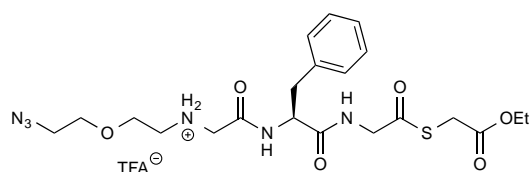

**3**

To a solution of **S12** (0.34 g, 0.57 mmol) in  $\text{CH}_2\text{Cl}_2$  (2.0 mL) was added TFA (2.0 mL). The mixture was stirred at RT for 1 h and diluted with  $\text{CH}_2\text{Cl}_2$  and  $\text{H}_2\text{O}$ . The aqueous phase was extracted with  $\text{CH}_2\text{Cl}_2$  (3x). The combined organic phases were dried over  $\text{Na}_2\text{SO}_4$ , filtered and concentrated

under reduced pressure to give **3** (0.31 g, 89% yield) as a pale yellow amorphous.

**<sup>1</sup>H NMR** (400 MHz, CDCl<sub>3</sub>) δ 8.08 (d, *J* = 7.9 Hz, 1H), 7.98 (t, *J* = 5.9 Hz, 1H), 7.73 (br s, 2H), 7.28-7.15 (m, 5H), 4.78 (m, 1H), 4.18-4.10 (m, 4H), 4.02 (d, *J* = 16.2 Hz, 1H), 3.83 (d, *J* = 16.2 Hz, 1H), 3.75-3.73 (m, 2H), 3.65 (d, *J* = 0.78 Hz, 2H), 3.62-3.60 (m, 2H), 3.37 (m, 2H), 3.22-3.13 (m, 3H), 2.95 (dd, *J* = 13.9, 8.6 Hz, 1H), 1.26 (t, *J* = 7.1 Hz, 3H).

**<sup>13</sup>C NMR** (100 MHz, CDCl<sub>3</sub>) δ 195.49, 172.45, 169.29, 165.54, 160.84 (q, *J* = 39 Hz), 135.74, 129.18, 128.66, 127.22, 115.42 (q, *J* = 287 Hz), 69.84, 65.66, 62.40, 55.32, 50.46, 48.85, 48.54, 47.77, 37.82, 30.95, 13.89.

$[\alpha]_D^{26} = -12.3^\circ$  (c 0.47, CHCl<sub>3</sub>)

**IR** (thin film) 3287, 3067, 3033, 2987, 2932, 2109, 1667, 1556, 1304, 1200, 1179, 1139 cm<sup>-1</sup>.

**HRMS** (ESI) calcd for C<sub>21</sub>H<sub>31</sub>N<sub>6</sub>O<sub>6</sub>S [M+H-TFA]<sup>+</sup>: 495.2020, found: 495.2015.

### **N-Fmoc hydroxylamine S14**

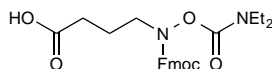

**S14**

To a solution of *N*-Boc hydroxylamine **S13**<sup>9</sup> (1.2 g, 3.8 mmol, 1.0 equiv) in CH<sub>2</sub>Cl<sub>2</sub> (3.0 mL) was added TFA (3.0 mL). The mixture was stirred at RT for 2 h and the volatiles were evaporated under reduced pressure. The residue was dissolved in dioxane/H<sub>2</sub>O (10 mL, 1:1), and Na<sub>2</sub>CO<sub>3</sub> (2.0 g, 19 mmol, 5.0 equiv) followed by Fmoc chloride (1.2 g, 4.6 mmol, 1.2 equiv) were added to this solution. The mixture was stirred at RT for 2 h and diluted with CH<sub>2</sub>Cl<sub>2</sub>. The aqueous phase was acidified with 1 M aq HCl to pH 2 and extracted with CH<sub>2</sub>Cl<sub>2</sub> (3x). The combined organic phases were washed with brine, dried over Na<sub>2</sub>SO<sub>4</sub>, filtered and concentrated under reduced pressure. The residue was purified by flash column chromatography (hexanes/EtOAc 1:2) to give **S14** (rotamers, 1.0 g, 60% yield over 2 steps) as a colorless oil that solidified in the freezer.

**<sup>1</sup>H NMR** (400 MHz, CDCl<sub>3</sub>) δ 7.75 (m, 2H), 7.60-7.55 (m, 2H), 7.39 (m, 2H), 7.30 (m, 2H), 4.50 (d, *J* = 6.8 Hz, 2H), 4.24 (t, *J* = 6.8 Hz, 1H), 3.73-3.71 (m, 2H), 3.32-3.30 (m, 4H), 2.42 (t, *J* = 7.3 Hz, 2H), 1.90 (q, *J* = 6.9 Hz, 2H), 1.16 (t, *J* = 7.2 Hz, 6H).

**<sup>13</sup>C NMR** (100 MHz, CDCl<sub>3</sub>) δ 178.22, 155.80, 153.96, 143.59, 141.28, 127.72, 127.08, 124.96, 119.92, 68.14, 49.70, 47.04, 43.08, 41.60, 30.84, 22.24, 14.02, 13.26.

**IR** (thin film) 2978, 2933, 1741, 1714, 1450, 1422, 1270, 1145, 1109 cm<sup>-1</sup>.

**HRMS** (ESI) calcd for C<sub>24</sub>H<sub>29</sub>N<sub>2</sub>O<sub>6</sub> [M+H]<sup>+</sup>: 441.2020, found: 441.2021.



**B21C7-N-Boc amine S17**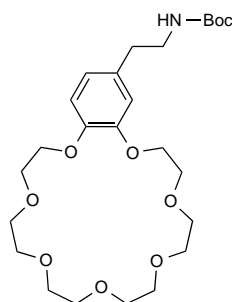**S17**

To a solution of *N*-Boc dopamine **S15**<sup>10</sup> (1.6 g, 6.4 mmol, 1.0 equiv) in CH<sub>3</sub>CN (50 mL) was added hexaethylene glycol ditosylate **S16**<sup>4</sup> (3.8 g, 6.4 mmol, 1.0 equiv), K<sub>2</sub>CO<sub>3</sub> (2.7 g, 19 mmol, 3.0 equiv) followed by KPF<sub>6</sub> (1.8 g, 9.6 mmol, 1.5 equiv). The mixture was refluxed at 105 °C for 21 h and cooled to RT. The reaction mixture was diluted with H<sub>2</sub>O and extracted with CH<sub>2</sub>Cl<sub>2</sub> (3x). The combined organic phases were dried over Na<sub>2</sub>SO<sub>4</sub>, filtered and concentrated under reduced pressure. The residue was purified by flash column chromatography (CH<sub>2</sub>Cl<sub>2</sub>/MeOH 20:1) to give **S17** (3.0 g, 94% yield) as a pale brown solid.

<sup>1</sup>H NMR (400 MHz, CDCl<sub>3</sub>) δ 6.84-6.82 (m, 1H), 6.74-6.72 (m, 2H), 4.58 (br s, 1H), 4.17-4.13 (m, 4H), 3.90-3.87 (m, 4H), 3.75-3.73 (m, 4H), 3.69-3.61 (m, 12H), 3.35-3.30 (m, 2H), 2.71 (t, *J* = 7.2 Hz, 2H), 1.42 (s, 9H).

<sup>13</sup>C NMR (100 MHz, CDCl<sub>3</sub>) δ 155.87, 148.47, 147.00, 132.73, 121.78, 114.83, 114.50, 79.17, 70.14, 70.03, 69.80, 69.34, 69.31, 68.81, 68.56, 41.81, 35.67, 28.38.

IR (thin film) 2927, 2875, 1702, 1514, 1260, 1169, 1121 cm<sup>-1</sup>.

HRMS (ESI) calcd for C<sub>25</sub>H<sub>45</sub>N<sub>2</sub>O<sub>9</sub> [M+NH<sub>4</sub>]<sup>+</sup>: 517.3120, found: 517.3123.

**B21C7-N-Fmoc hydroxylamine 2**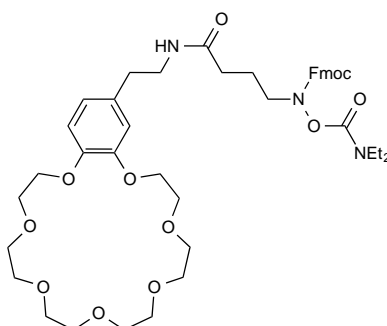**2**

B21C7-*N*-Boc amine **S17** (0.49 g, 0.98 mmol) in CH<sub>2</sub>Cl<sub>2</sub> (2.0 mL) was added TFA (2.0 mL). The mixture was stirred at RT for 2 h and basified with sat aq Na<sub>2</sub>CO<sub>3</sub>. The aqueous phase was extracted with CH<sub>2</sub>Cl<sub>2</sub> (3x). The combined organic phases were dried over Na<sub>2</sub>SO<sub>4</sub>, filtered and concentrated under reduced pressure to give a crude material of the unprotected amine (0.34 g, 87% yield). The unprotected amine (0.34 g, 0.85 mmol, 1.0 equiv) was dissolved in DMF (2.0 mL),

and this solution was added to a solution of *N*-Fmoc hydroxylamine **S14** (0.45 g, 1.0 mmol, 1.2 equiv), HCTU (0.42 g, 1.0 mmol, 1.2 equiv), and DIPEA (0.44 mL, 2.6 mmol, 3.0 equiv) in DMF (3.0 mL). The mixture was stirred at RT for 18 h and diluted with CH<sub>2</sub>Cl<sub>2</sub>. The organic phase was washed with 1 M aq HCl (1x), then H<sub>2</sub>O (2x), then dried over Na<sub>2</sub>SO<sub>4</sub>, filtered and concentrated under reduced pressure. The residue was purified by preparative RP-HPLC using a YMC C18 column with a gradient of 40 to 95% CH<sub>3</sub>CN in 28 min. The pure product fractions were pooled and lyophilized to obtain **2** (rotamers, 0.41 g, 59% yield) as a colorless amorphous.

<sup>1</sup>H NMR (400 MHz, CDCl<sub>3</sub>) δ 7.74 (d, *J* = 7.6 Hz, 2H), 7.56 (dd, *J* = 7.5, 1.0 Hz, 2H), 7.38 (t, *J* = 7.4 Hz, 2H), 7.29 (m, 2H), 6.80-6.78 (m, 1H), 6.73-6.69 (m, 2H), 6.50 (br s, 1H), 4.51 (d, *J* = 6.6 Hz, 2H), 4.22 (t, *J* = 6.6 Hz, 1H), 4.15-4.10 (m, 4H), 3.90-3.87 (m, 4H), 3.79-3.76 (m, 4H), 3.73-3.70 (m, 4H), 3.68-3.64 (m, 8H), 3.61 (t, *J* = 6.2 Hz, 2H), 3.47 (q, *J* = 6.8 Hz, 2H), 3.32-3.23 (m, 4H), 2.73 (t, *J* = 7.3 Hz, 2H), 2.24 (t, *J* = 7.3 Hz, 2H), 1.85 (p, *J* = 6.7 Hz, 2H), 1.15 (t, *J* = 7.1 Hz, 6H).

<sup>13</sup>C NMR (100 MHz, CDCl<sub>3</sub>) δ 174.07, 156.17, 154.14, 148.99, 147.55, 143.51, 141.32, 131.82, 127.81, 127.10, 124.93, 121.39, 120.00, 114.72, 114.51, 71.04, 71.03, 71.00, 70.98, 70.95, 70.51, 69.81, 69.79, 69.33, 69.20, 68.14, 49.65, 47.05, 43.15, 41.67, 41.06, 34.92, 33.01, 23.64, 14.06, 13.29.

IR (thin film) 2934, 2875, 1744, 1514, 1451, 1424, 1266, 1143, 1106 cm<sup>-1</sup>.

HRMS (ESI) calcd for C<sub>44</sub>H<sub>63</sub>N<sub>4</sub>O<sub>12</sub> [M+NH<sub>4</sub>]<sup>+</sup>: 839.4437, found: 839.4433.

## [2]Rotaxane **4**

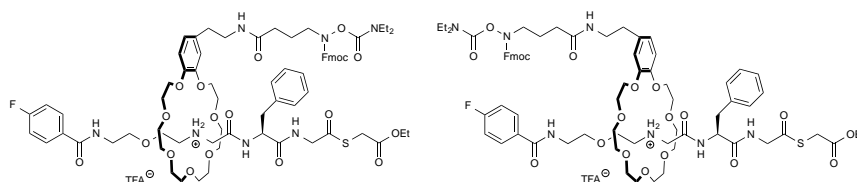

**4**

4-Fluorophenyl KAT **1** (81 mg, 0.35 mmol, 1.0 equiv), crown ether **2** (0.29 g, 0.35 mmol, 1.0 equiv), and **3** (0.21 g, 0.35 mmol, 1.0 equiv) were dissolved in CH<sub>3</sub>CN (3.2 mL), and HBF<sub>4</sub>•OEt<sub>2</sub> (96 μL, 0.70 mmol, 2.0 equiv) was added. The mixture was stirred at RT for 17 h. The reaction was quenched with H<sub>2</sub>O. The crude material was purified by preparative HPLC using a YMC C18 column with a gradient of 60 to 80% CH<sub>3</sub>CN with 0.1% TFA in 28 min. The pure product fractions were pooled and lyophilized to obtain 116 mg of **4** (21% yield) as a mixture of diastereomers.

In the same purification, the peaks containing axle **5** were also collected, and these fractions were pooled and lyophilized. The lyophilizates were repurified by preparative HPLC using a YMC C18 column with a gradient of 20 to 95% CH<sub>3</sub>CN with 0.1% TFA in 28 min. The pure product fractions were pooled and lyophilized to obtain 63 mg of **5** (31% yield).

<sup>1</sup>H NMR (400 MHz, CDCl<sub>3</sub>) δ 9.54 (dd, *J* = 16.1, 8.5 Hz, 1H), 9.00-8.94 (m, 1H), 7.86-7.63 (m, 6H), 7.56 (d, *J* = 7.4 Hz, 2H), 7.38 (t, *J* = 7.5 Hz, 2H), 7.34-7.27 (m, 4H), 7.19 (q, *J* = 7.6 Hz, 2H), 7.14-

7.08 (m, 1H), 7.02-6.97 (m, 2H), 6.91 (q,  $J = 5.5$  Hz, 1H), 6.68-6.53 (m, 4H), 4.80-4.64 (m, 1H), 4.45 (d,  $J = 6.9$  Hz, 1H), 4.29-4.19 (m, 3H), 4.16-3.77 (m, 10H), 3.72-3.26 (m, 37H), 2.98-2.91 (m, 1H), 2.71 (t,  $J = 6.9$  Hz, 2H), 2.22 (q,  $J = 6.9$  Hz, 2H), 1.90-1.83 (m, 2H), 1.25-1.21 (m, 3H), 1.15 (t,  $J = 7.1$  Hz, 6H).

$^{13}\text{C}$  NMR (100 MHz,  $\text{CDCl}_3$ )  $\delta$  196.19, 196.14, 173.21, 173.15, 173.05, 168.62, 166.84, 166.09, 166.03, 164.59 (d,  $J = 252$  Hz), 160.72 (q,  $J = 37.1$  Hz), 156.10, 154.05, 146.83, 146.79, 145.47, 143.51, 141.24, 138.00, 132.20, 130.43 (d,  $J = 3.2$  Hz), 129.53, 129.45, 129.21 (d,  $J = 9.0$  Hz), 128.14, 127.79, 127.07, 126.18, 126.11, 124.96, 121.09, 119.96, 116.04 (q,  $J = 291$  Hz), 115.46 (d,  $J = 22.0$  Hz), 112.17, 112.13, 111.38, 111.31, 71.15, 71.11, 71.09, 70.77, 70.67, 70.59, 70.54, 69.55, 69.46, 69.37, 69.35, 69.32, 68.19, 68.00, 67.91, 67.82, 66.33, 61.69, 56.09, 55.90, 49.76, 48.95, 48.44, 46.98, 46.35, 43.08, 41.61, 40.83, 40.76, 39.43, 38.00, 37.91, 34.93, 33.14, 30.81, 23.49, 14.06, 14.00, 13.27.

$^{19}\text{F}$  NMR (376 MHz,  $\text{CDCl}_3$ )  $\delta$  -107.82, -107.83.

IR (thin film) 3061, 2931, 1741, 1687, 1262, 1200, 1142, 1116  $\text{cm}^{-1}$ .

HRMS (MALDI) calcd for  $\text{C}_{72}\text{H}_{95}\text{FN}_7\text{O}_{19}\text{S}$   $[\text{M}+\text{H}-\text{TFA}]^+$ : 1412.6382, found: 1412.6379.

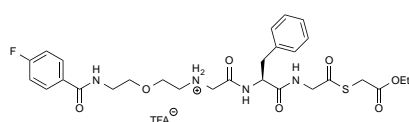

5

$^1\text{H}$  NMR (400 MHz,  $\text{CDCl}_3$ )  $\delta$  8.29 (d,  $J = 8.2$  Hz, 1H), 8.18 (t,  $J = 5.5$  Hz, 1H), 7.85-7.81 (m, 2H), 7.58 (br s, 1H), 7.22-7.11 (m, 5H), 7.03 (t,  $J = 8.5$  Hz, 2H), 4.79-4.73 (m, 1H), 4.14-4.05 (m, 4H), 3.95 (d,  $J = 16.1$  Hz, 1H), 3.74 (d,  $J = 16.1$  Hz, 1H), 3.65-3.57 (m, 8H), 3.16-3.06 (m, 3H), 2.88 (dd,  $J = 14.0, 8.9$  Hz, 1H), 1.23 (t,  $J = 7.1$  Hz, 3H).

$^{13}\text{C}$  NMR (100 MHz,  $\text{CDCl}_3$ )  $\delta$  195.77, 171.96, 169.06, 167.48, 165.50, 164.77 (d,  $J = 252$  Hz), 161.67 (q,  $J = 38.4$  Hz), 136.21, 130.05 (d,  $J = 3.2$  Hz), 129.70 (d,  $J = 8.9$  Hz), 129.23, 128.52, 127.01, 116.14 (q,  $J = 291$  Hz), 115.46 (d,  $J = 21.8$  Hz), 70.08, 65.33, 62.22, 55.07, 48.84, 48.34, 47.42, 39.83, 37.95, 30.95, 13.95.

$^{19}\text{F}$  NMR (376 MHz,  $\text{CDCl}_3$ )  $\delta$  -107.85.

$[\alpha]_{\text{D}}^{28} = -10.3^\circ$  (c 0.81,  $\text{CHCl}_3$ )

IR (thin film) 3293, 3066, 1669, 1555, 1504, 1296, 1200, 1133  $\text{cm}^{-1}$ .

HRMS (ESI) calcd for  $\text{C}_{28}\text{H}_{36}\text{FN}_4\text{O}_7\text{S}$   $[\text{M}+\text{H}-\text{TFA}]^+$ : 591.2283, found: 591.2272.

## 4.2. Peptide $\alpha$ -ketoacid **7**

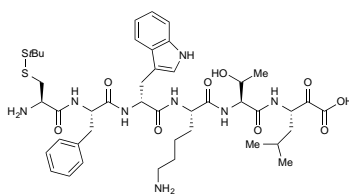

**7**

Peptide  $\alpha$ -ketoacid **7** was prepared using the protected leucine  $\alpha$ -ketoacid resin **S1** on a 0.18 mmol scale (1.0 g) with a substitution capacity of 0.18 mmol/g. After the full assembly of amino acids, the resin was treated with (95:2.5:2.5) TFA:DODT:H<sub>2</sub>O for 1 h and removed by filtration. The volatiles were evaporated from the filtrate under reduced pressure. The residue was triturated with Et<sub>2</sub>O and centrifuged to obtain the crude **7**. Purification of crude **7** was performed by preparative HPLC using YMC C18 column (20 x 250 mm) with a gradient of 20 to 95% CH<sub>3</sub>CN with 0.1% TFA in 28 min. The pure product fractions were pooled and lyophilized to obtain 44 mg of **7** (27% yield for peptide synthesis, resin cleavage and purification steps). Analytical HPLC and HRMS were used to confirm the purity and exact mass of the product.

**HRMS** (MALDI) calcd for C<sub>44</sub>H<sub>65</sub>N<sub>8</sub>O<sub>9</sub>S<sub>2</sub> [M+H]<sup>+</sup>: 913.4310, found: 913.4319.

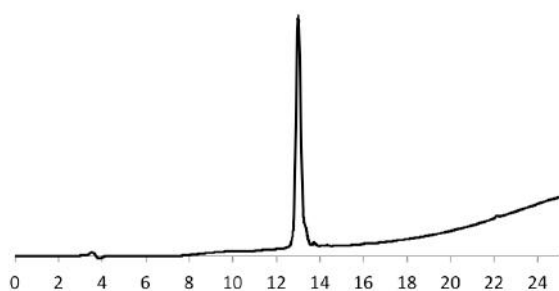

**Fig. S2.** Analytical HPLC of purified **7**

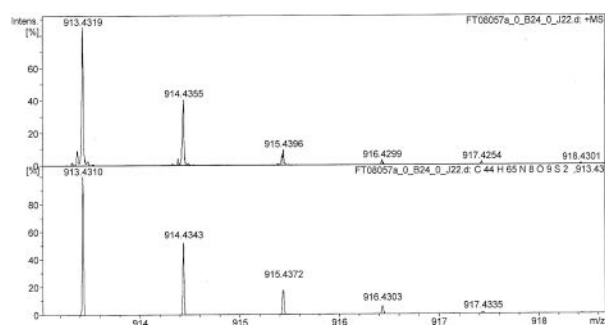

**Fig. S3.** HRMS (MALDI) of measured (top) and calculated (bottom) isotopic pattern of **7**

**Note:** Products derived from [2]rotaxane **4** were obtained as a mixture of diastereomers. For simplicity, structures of one of the diastereomers are shown in the following sections.

### 4.3. Synthesis of lasso peptide L1

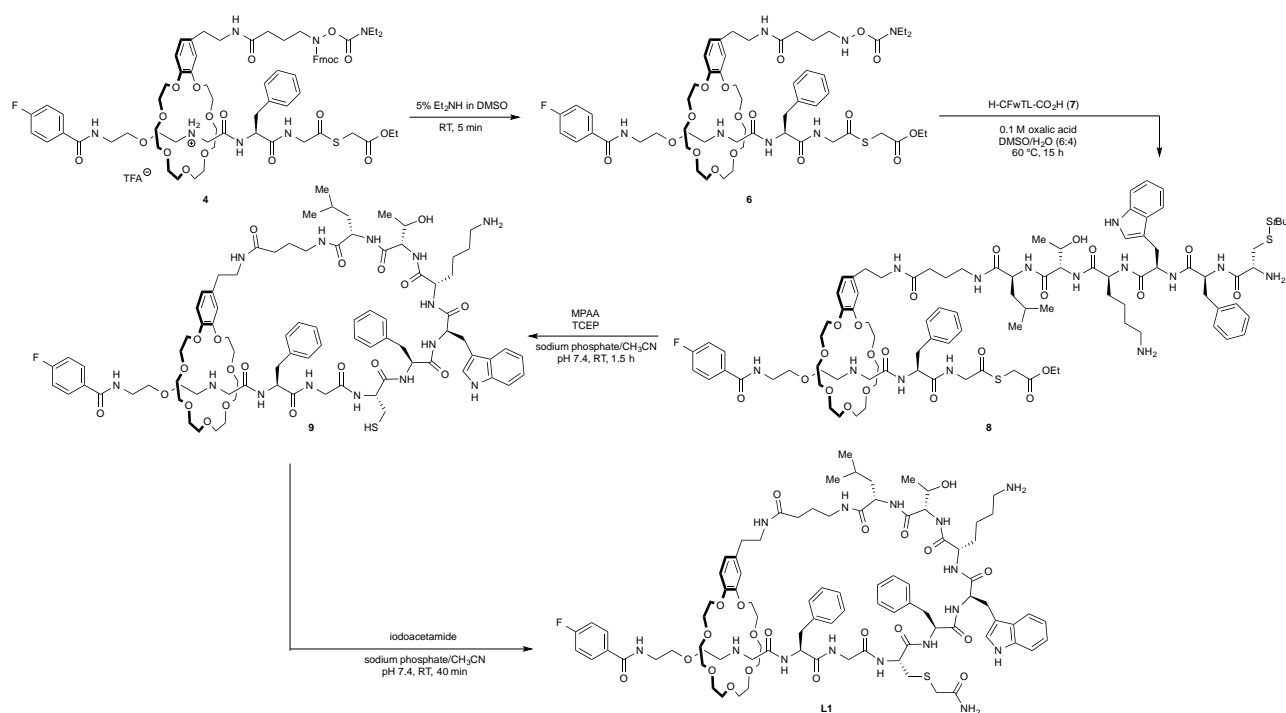

**Scheme S3.** Synthesis of lasso peptide L1

### Peptido[2]rotaxane **8**

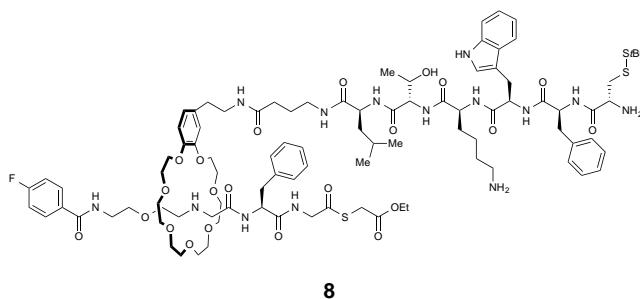

To a solution of rotaxane **4** (40 mg, 28 μmol) in DMSO (760 μL) was added Et<sub>2</sub>NH (40 μL), and the mixture was incubated at RT for 5 min and purified by preparative HPLC using YMC C18 column (20 x 250 mm) with a gradient of 20 to 95% CH<sub>3</sub>CN with 0.1% TFA in 28 min. The pure product fraction was lyophilized to give the unprotected hydroxylamine **6** (31 mg, 78% yield). The isolated unprotected hydroxylamine **6** was somewhat unstable and immediately used for the next ligation step. Characterization was therefore conducted only by HRMS (MALDI).

**HRMS (MALDI)** calcd for C<sub>57</sub>H<sub>85</sub>FN<sub>7</sub>O<sub>17</sub>S [M+H]<sup>+</sup>: 1190.5701, found: 1190.5701.

The lyophilizate **6** (21 mg, 22 μmol, 1.2 equiv) and peptide α-ketoacid **7** (17 mg, 18 μmol, 1.0 equiv) were dissolved in DMSO/H<sub>2</sub>O (6:4, 360 μL, 0.1 M oxalic acid). The resulting mixture was incubated at 60 °C for 15 h and cooled to RT. Purification was performed by preparative HPLC

using YMC C18 column (20 x 250 mm) with a gradient of 20 to 95% CH<sub>3</sub>CN with 0.1% TFA in 28 min. The pure product fractions were pooled and lyophilized to obtain 8.2 mg of **8** (23% yield). Analytical HPLC and HRMS were used to confirm the purity and exact mass of the product.

**HRMS** (MALDI) calcd for C<sub>95</sub>H<sub>138</sub>FN<sub>14</sub>O<sub>22</sub>S<sub>3</sub> [M+H]<sup>+</sup>: 1941.9251, found: 1941.9277.

t = 14 h

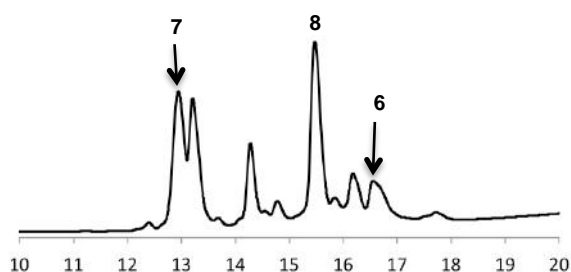

**Fig. S4.** HPLC monitoring of the KAHA ligation to form **8**

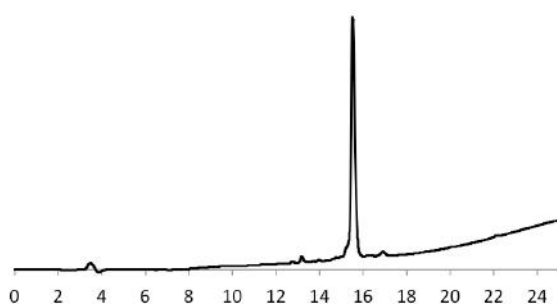

**Fig. S5.** Analytical HPLC of purified **8**

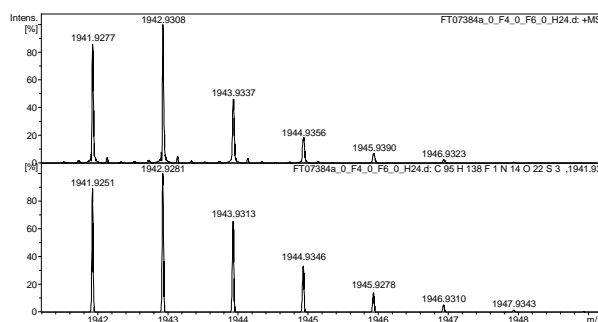

**Fig. S6.** HRMS (MALDI) of measured (top) and calculated (bottom) isotopic pattern of **8**

## Lasso peptide **9**

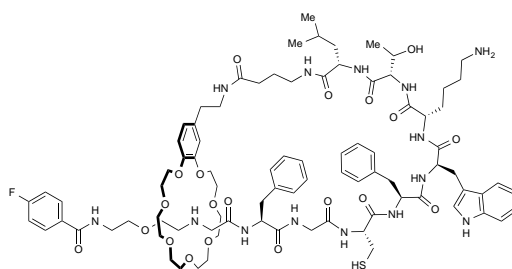

**9**

4-Mercaptophenylacetic acid (8.2 mg, 49 μmol, 10 equiv) and TCEP-HCl (28 mg, 98 μmol, 20 equiv) were dissolved in 0.25 M sodium phosphate buffer (pH 8.0)/CH<sub>3</sub>CN (1:1, 1.2 mL), and pH of this solution was adjusted to 7.5 by adding 1 M aq NaOH. A solution of **8** (9.5 mg, 4.9 μmol, 1.0 equiv) in 0.1 M sodium phosphate buffer (pH 7.4)/CH<sub>3</sub>CN (1:1, 0.20 mL) was prepared, and a portion (50 μL) of this solution was added to the ligation buffer. The mixture was incubated at RT for 10 min, and the next portion (50 μL) of the solution of **8** was added to the mixture. This addition-incubation process was repeated every 10 minutes. After complete addition, the mixture was further incubated at RT for 1 h and purified by preparative HPLC using YMC C18 column (20 x 250

mm) with a gradient of 20 to 95% CH<sub>3</sub>CN with 0.1% TFA in 28 min. The pure product fractions were pooled and lyophilized to obtain 6.0 mg of **9** (71% yield). Analytical HPLC and HRMS were used to confirm the purity and exact mass of the product.

**HRMS** (MALDI) calcd for C<sub>87</sub>H<sub>122</sub>FN<sub>14</sub>O<sub>20</sub>S [M+H]<sup>+</sup>: 1733.8659, found: 1733.8661.

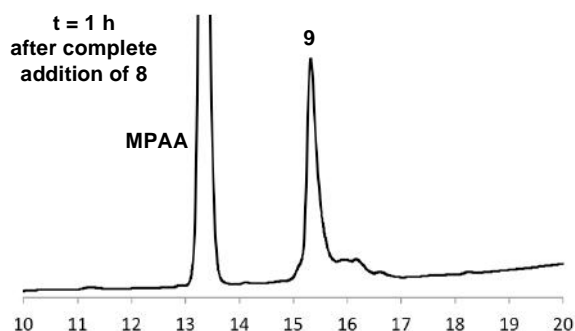

**Fig. S7.** HPLC of monitoring of the NCL to form **9**

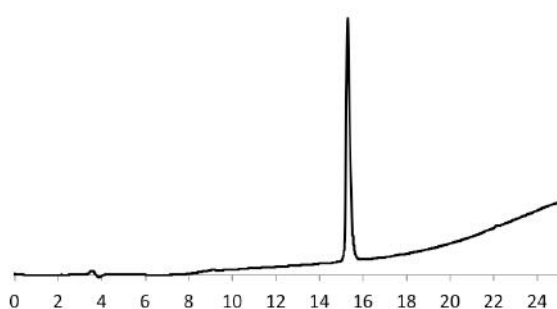

**Fig. S8.** Analytical HPLC of purified **9**

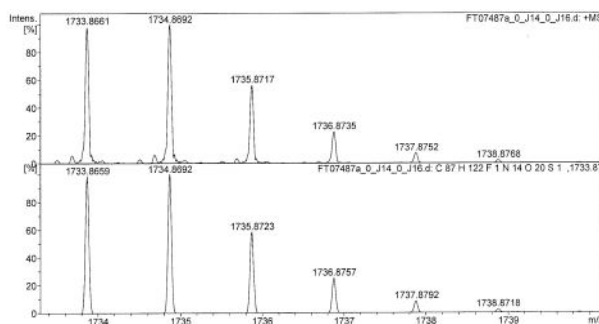

**Fig. S9.** HRMS (MALDI) of measured (top) and calculated (bottom) isotopic pattern of **9**

## Cys-alkylated lasso peptide **L1**

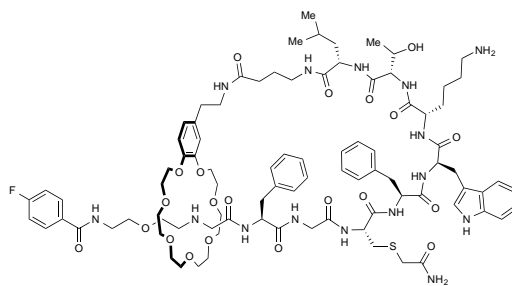

**L1**

To a solution of **9** (8.9 mg, 5.1 μmol, 1.0 equiv) in 0.1 M sodium phosphate buffer (pH 7.4)/CH<sub>3</sub>CN (1:1, 410 μL) was added a solution of iodoacetamide (1.0 mg, 5.6 μmol, 1.1 equiv) in 0.1 M sodium phosphate buffer (pH 7.4)/CH<sub>3</sub>CN (1:1, 100 μL). The mixture was incubated at RT for 40 min and purified by preparative HPLC using YMC C18 column (20 x 250 mm) with a gradient of 20 to 95% CH<sub>3</sub>CN with 0.1% TFA in 28 min. The pure product fractions were pooled and lyophilized to obtain 6.0 mg of **L1** (66% yield). Analytical HPLC and HRMS were used to confirm the purity and exact mass of the product.

HRMS (MALDI) calcd for  $C_{89}H_{125}FN_{15}O_{21}S$   $[M+H]^+$ : 1790.8874, found: 1790.8859.

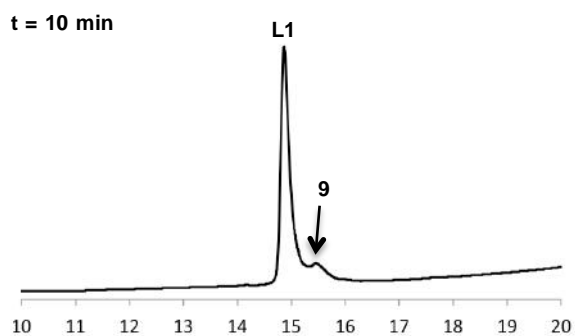

Fig. S10. HPLC monitoring of the cysteine alkylation to form L1

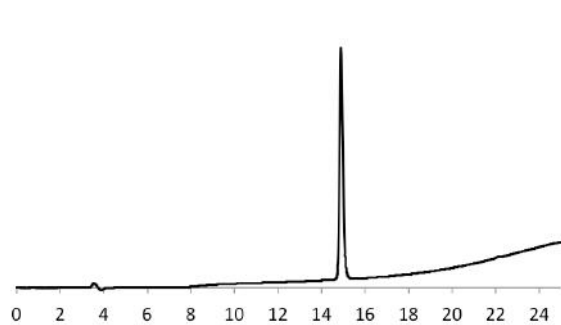

Fig. S11. Analytical HPLC of purified L1

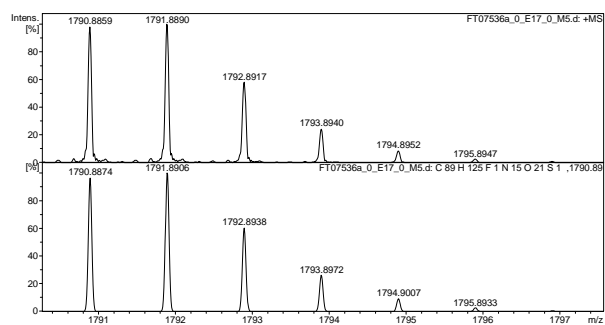

Fig. S12. HRMS (MALDI) of measured (top) and calculated (bottom) isotopic pattern of L1



5. Synthesis of branched-cyclic peptide **B1**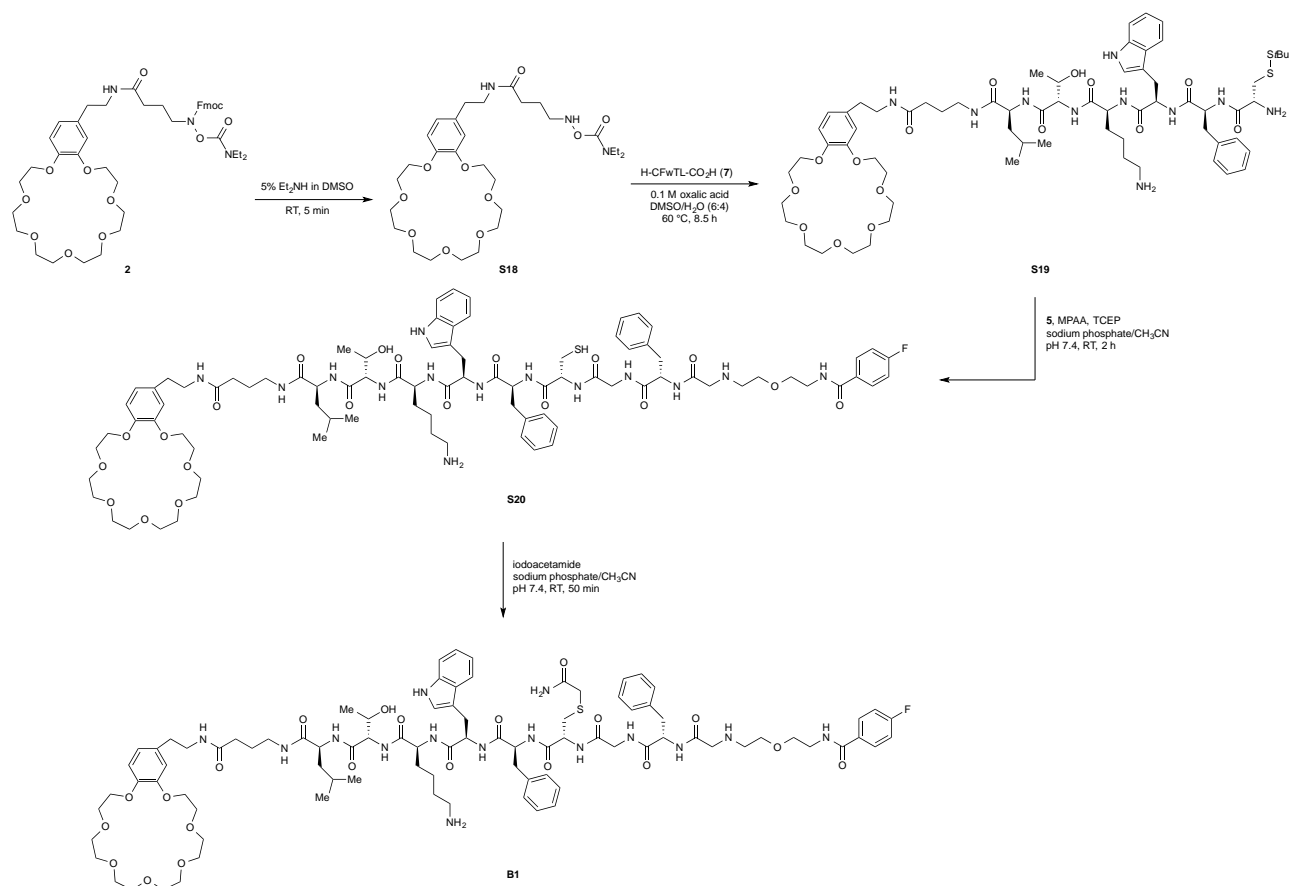Scheme S4. Synthesis of branched-cyclic peptide **B1**KAHA ligation product **S19**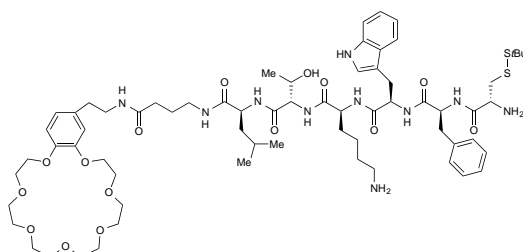**S19**

To a solution of crown ether **2** (91 mg, 0.11 mmol) in DMSO (570  $\mu\text{L}$ ) was added  $\text{Et}_2\text{NH}$  (30  $\mu\text{L}$ ), and the mixture was incubated at RT for 5 min and purified by preparative HPLC using YMC C18 column (20 x 250 mm) with a gradient of 20 to 95%  $\text{CH}_3\text{CN}$  with 0.1% TFA in 28 min. The pure product fraction was lyophilized to give the unprotected hydroxylamine **S18** (57 mg, 86% yield). The isolated unprotected hydroxylamine **S18** was somewhat unstable and immediately used for the next ligation step. Characterization was therefore conducted only by HRMS (ESI).

**HRMS** (ESI) calcd for  $\text{C}_{29}\text{H}_{50}\text{N}_3\text{O}_{10}$   $[\text{M}+\text{H}]^+$ : 600.3491, found: 600.3478.

The lyophilizate **S18** (14 mg, 23  $\mu\text{mol}$ , 2.0 equiv) and peptide  $\alpha$ -ketoacid **7** (11 mg, 12  $\mu\text{mol}$ , 1.0 equiv) were dissolved in DMSO/H<sub>2</sub>O (6:4, 234  $\mu\text{L}$ , 0.1 M oxalic acid). The resulting mixture was incubated at 60 °C for 8.5 h and cooled to RT. Purification was performed by preparative HPLC

using YMC C18 column (20 x 250 mm) with a gradient of 20 to 95% CH<sub>3</sub>CN with 0.1% TFA in 28 min. The pure product fractions were pooled and lyophilized to obtain 5.9 mg of **S19** (37% yield). Analytical HPLC and HRMS were used to confirm the purity and exact mass of the product.

**HRMS** (MALDI) calcd for C<sub>67</sub>H<sub>103</sub>N<sub>10</sub>O<sub>15</sub>S<sub>2</sub> [M+H]<sup>+</sup>: 1351.7040, found: 1351.7039.

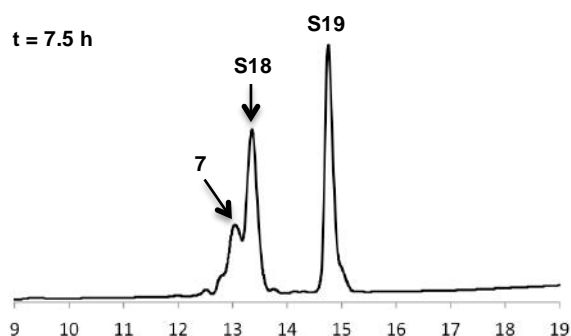

**Fig. S13.** HPLC monitoring of the KAHA ligation to form **S19**

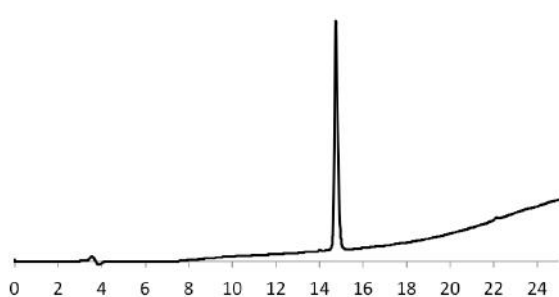

**Fig. S14.** Analytical HPLC of purified **S19**

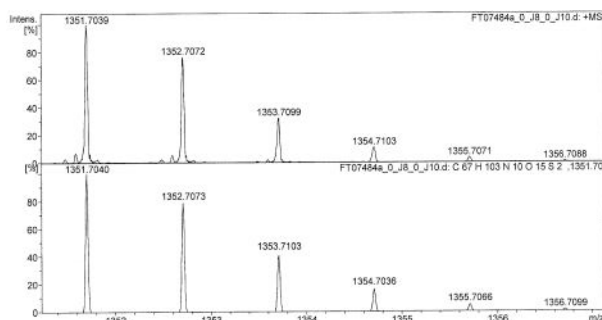

**Fig. S15.** HRMS (MALDI) of measured (top) and calculated (bottom) isotopic pattern of **S19**

## NCL product **S20**

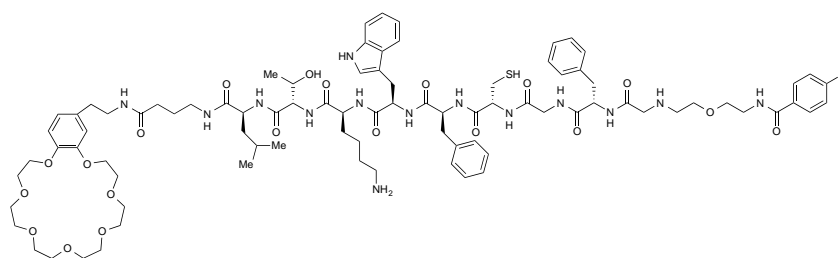

**S20**

4-Mercaptophenylacetic acid (12 mg, 73 μmol, 10 equiv) and TCEP-HCl (42 mg, 146 μmol, 20 equiv) were dissolved in 0.25 M sodium phosphate buffer (pH 8.0)/CH<sub>3</sub>CN (1:1, 1.4 mL), and pH of this solution was adjusted to 7.9 by adding 1 M aq NaOH. To this ligation buffer were added a solution of axle-thioester **5** (5.2 mg, 8.8 μmol, 1.2 equiv) in CH<sub>3</sub>CN (0.20 mL) followed by a solution of **S19** (9.9 mg, 7.3 μmol, 1.0 equiv) in 0.1 M sodium phosphate buffer (pH 7.4)/CH<sub>3</sub>CN (1:1, 0.30 mL), and the mixture was incubated at RT for 2 h. Purification was performed by preparative HPLC using YMC C18 column (20 x 250 mm) with a gradient of 20 to 95% CH<sub>3</sub>CN with 0.1% TFA in 28 min. The pure product fractions were pooled and lyophilized to obtain 9.2 mg of **S20** (73% yield).

Analytical HPLC and HRMS were used to confirm the purity and exact mass of the product.

**HRMS (MALDI)** calcd for  $C_{87}H_{122}FN_{14}O_{20}S$   $[M+H]^+$ : 1733.8659, found: 1733.8662.

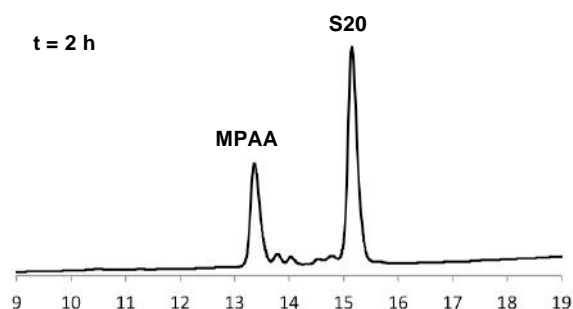

**Fig. S16.** HPLC monitoring of the NCL to form **S20**

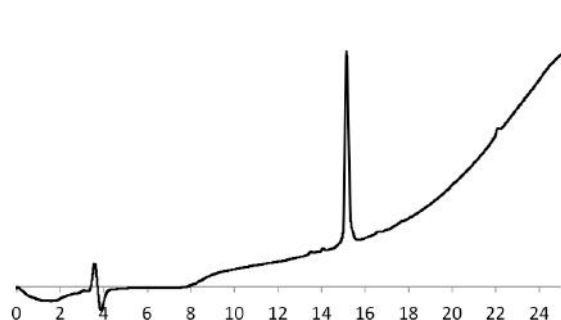

**Fig. S17.** Analytical HPLC of purified **S20**

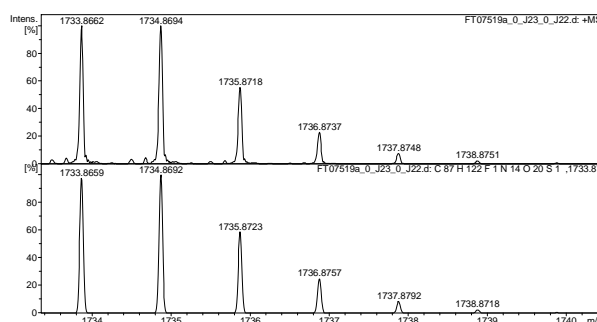

**Fig. S18.** HRMS (MALDI) of measured (top) and calculated (bottom) isotopic pattern of **S20**

### Branched-cyclic peptide **B1**

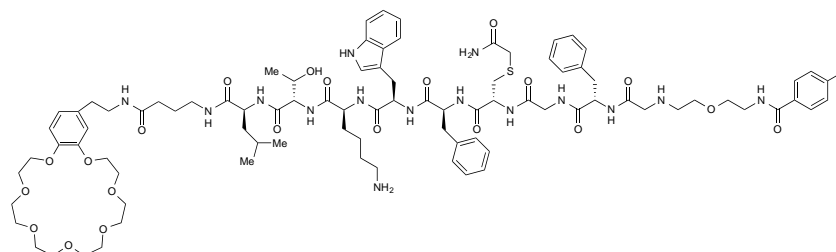

**B1**

To a solution of **S20** (10 mg, 5.8  $\mu$ mol, 1.0 equiv) in 0.1 M sodium phosphate buffer (pH 7.4)/ $CH_3CN$  (1:1, 0.46 mL) was added a solution of iodoacetamide (1.2 mg, 6.4  $\mu$ mol, 1.1 equiv) in 0.1 M sodium phosphate buffer (pH 7.4)/ $CH_3CN$  (1:1, 0.12 mL). The mixture was incubated at RT for 50 min and purified by preparative HPLC using YMC C18 column (20 x 250 mm) with a gradient of 20 to 95%  $CH_3CN$  with 0.1% TFA in 28 min. The pure product fractions were pooled and lyophilized to obtain 8.1 mg of **B1** (78% yield). Analytical HPLC and HRMS were used to confirm the purity and exact mass of the product.

**HRMS (MALDI)** calcd for  $C_{89}H_{125}FN_{15}O_{21}S$   $[M+H]^+$ : 1790.8874, found: 1790.8871.

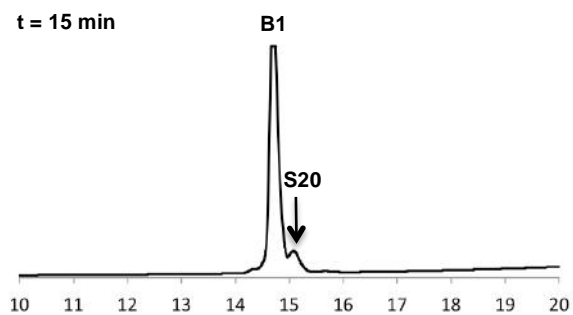

**Fig. S19.** HPLC monitoring of the cysteine alkylation to form **B1**

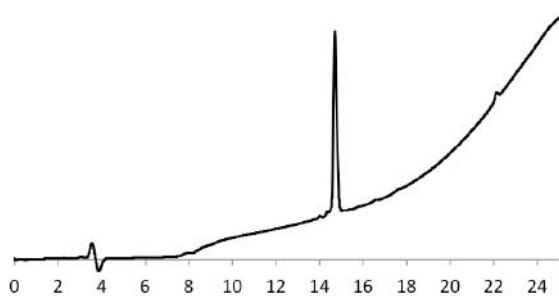

**Fig. S20.** Analytical HPLC of purified **B1**

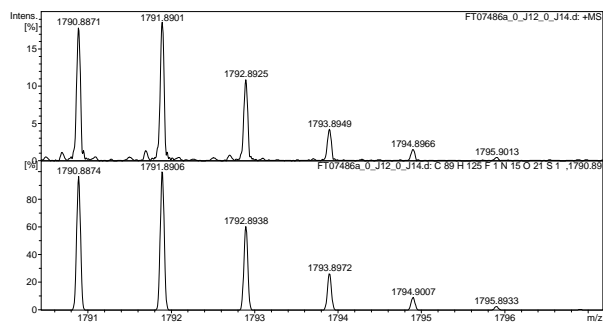

**Fig. S21.** HRMS (MALDI) of measured (top) and calculated (bottom) isotopic pattern of **B1**

## 6. Comparison of NMR spectra of L1 and B1

Significant peak overlaps around 3.2 ppm to 4.5 ppm in  $^1\text{H}$  NMR made complete assignment impossible. However,  $^1\text{H}$  NMR spectra of **L1** and **B1** were distinct, and a few characteristic peaks were found in the spectrum of **L1**.

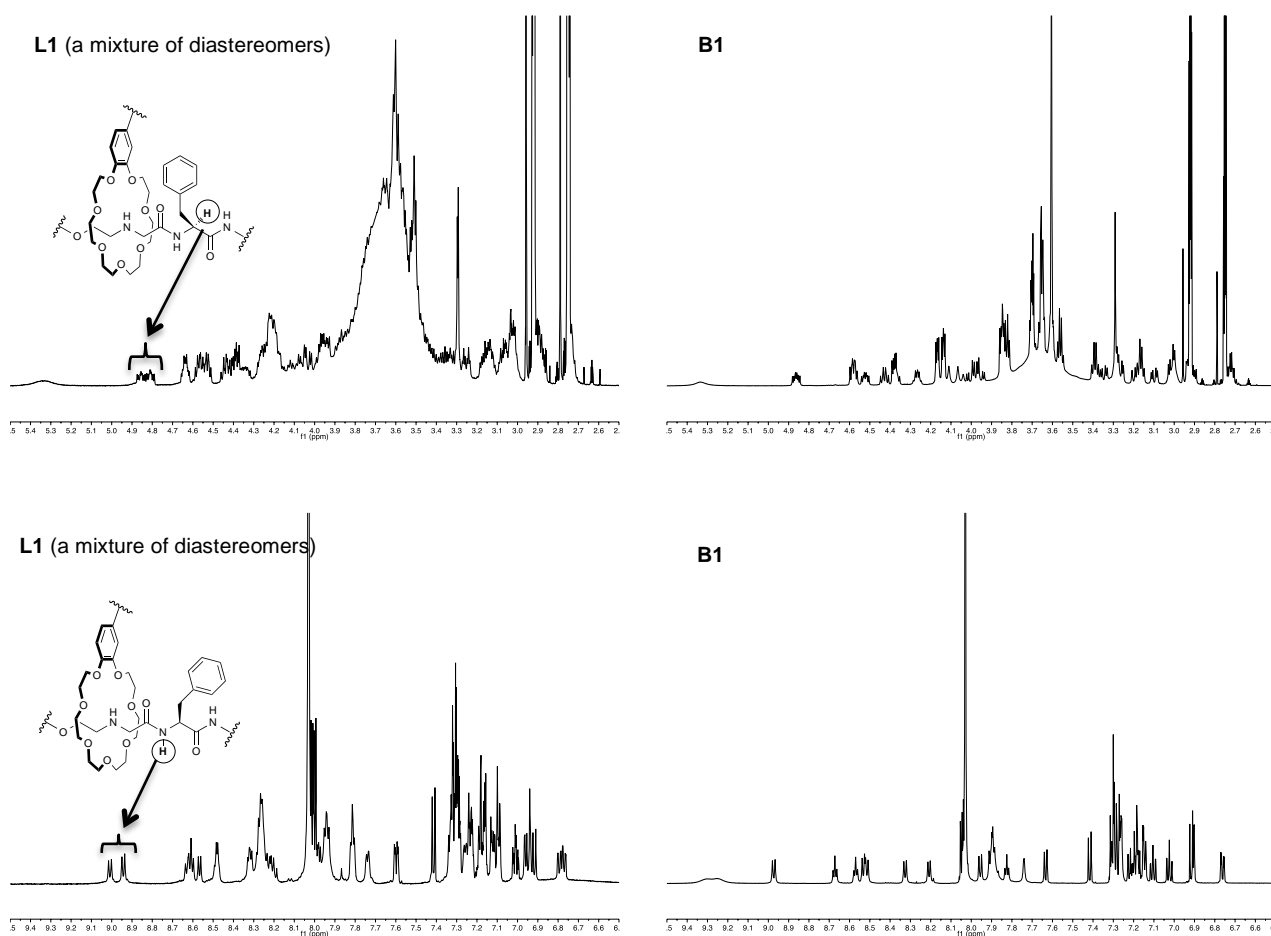

Figure S22. Selected regions of  $^1\text{H}$  NMR spectra (600 MHz,  $d_7$ -DMF) of **L1** and **B1**

## 7. Synthesis of lasso peptide L2

### 7.1. Synthesis of crown ether-*N*-Fmoc hydroxylamine **13**

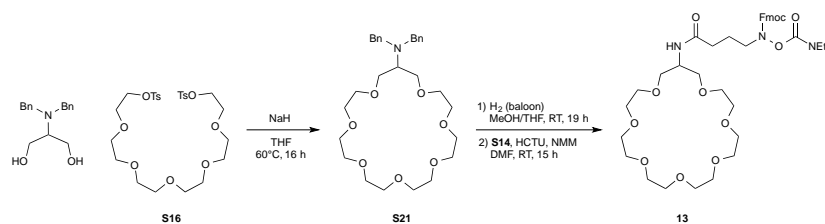

Scheme S5. Synthesis of crown ether-*N*-Fmoc hydroxylamine **13**

**Crown ether-diBn amine S21**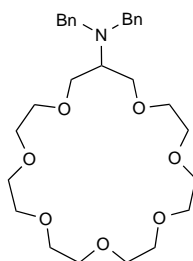**S21**

*Note: this reaction was conducted under N<sub>2</sub> atmosphere.* To a suspension of NaH (60% in mineral oil, 1.4 g, 36 mmol, 3.0 equiv) in dry THF (78 mL) was added a solution of 2-(*N,N*-dibenzylamino)-1,3-propanediol<sup>11</sup> (3.2 g, 12 mmol, 1.0 equiv) in dry THF (10 mL) at RT. The mixture was stirred at 60 °C for 10 min, and hexaethylene glycol ditosylate **S16** (7.0 g, 12 mmol, 1.0 equiv) was added. The reaction mixture was stirred at 60 °C for 16 h and cooled to RT. Sat aq NH<sub>4</sub>Cl (10 mL) was added carefully, and the mixture was diluted with CH<sub>2</sub>Cl<sub>2</sub> and H<sub>2</sub>O. The two phases were separated and the aqueous phase was extracted with CH<sub>2</sub>Cl<sub>2</sub> (3x). The combined organic phases were dried over Na<sub>2</sub>SO<sub>4</sub>, filtered and concentrated under reduced pressure. The residue was purified by flash column chromatography (EtOAc to EtOAc/MeOH 50:1) to give **S21** (1.3 g, 21% yield) as a pale yellow oil.

**<sup>1</sup>H NMR** (400 MHz, CDCl<sub>3</sub>) δ 7.38-7.36 (m, 4H), 7.29-7.27 (m, 3H), 7.26-7.25 (m, 1H), 7.21-7.17 (m, 2H), 3.78 (s, 4H), 3.72-3.52 (m, 28H), 3.06 (p, *J* = 5.8 Hz, 1H).

**<sup>13</sup>C NMR** (100 MHz, CDCl<sub>3</sub>) δ 140.66, 128.50, 128.02, 126.58, 70.81, 70.75, 70.67, 70.62, 70.55, 69.71, 56.54, 55.22.

**IR** (thin film) 2866, 1494, 1453, 1351, 1297, 1250, 1115 cm<sup>-1</sup>.

**HRMS** (ESI) calcd for C<sub>29</sub>H<sub>44</sub>NO<sub>7</sub> [M+H]<sup>+</sup>: 518.3112, found: 518.3112.

**Crown ether-*N*-Fmoc hydroxylamine 13**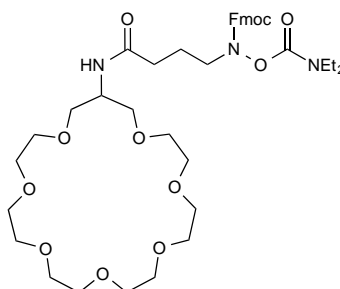**13**

To a solution of **S21** (1.1 g, 2.1 mmol) in MeOH/THF (18 mL, 5:1) was added Pd/C (10%, 123 mg). The mixture was stirred at RT under 1 atm H<sub>2</sub> (balloon) for 19 h and filtered through Celite<sup>®</sup>. The filtrate was concentrated under reduced pressure.

The residue (0.76 g, 2.2 mmol, 1.0 equiv) was dissolved in DMF (2.0 mL) and added to a premixed solution of **S14** (1.1 g, 2.4 mmol, 1.1 equiv), HCTU (1.0 g, 2.4 mmol, 1.1 equiv) and NMM (0.48

mL, 4.4 mmol, 2.0 equiv) in DMF (8.0 mL). The mixture was stirred at RT for 15 h and diluted with CH<sub>2</sub>Cl<sub>2</sub> and H<sub>2</sub>O. The two phases were separated and the aqueous phase was extracted with CH<sub>2</sub>Cl<sub>2</sub> (3x). The combined organic phases were washed with H<sub>2</sub>O, dried over Na<sub>2</sub>SO<sub>4</sub>, filtered and concentrated under reduced pressure. The residue was purified by flash column chromatography (EtOAc/MeOH 10:1) to give **13** (rotamers, 1.5 g, 88% yield) as a pale yellow oil.

<sup>1</sup>H NMR (400 MHz, CDCl<sub>3</sub>) δ 7.75 (d, *J* = 7.5 Hz, 2H), 7.58 (dd, *J* = 7.6, 1.1 Hz, 2H), 7.39 (td, *J* = 7.6, 1.0 Hz, 2H), 7.30 (td, *J* = 7.5, 1.2 Hz, 2H), 7.02-7.00 (m, 1H), 4.46 (d, *J* = 6.9 Hz, 2H), 4.25-4.18 (m, 2H), 3.71-3.60 (m, 28H), 3.53 (dd, *J* = 10.0, 5.2 Hz, 2H), 3.34-3.29 (m, 4H), 2.27 (t, *J* = 7.5 Hz, 2H), 1.96-1.89 (m, 2H), 1.16 (t, *J* = 7.1 Hz, 6H).

<sup>13</sup>C NMR (100 MHz, CDCl<sub>3</sub>) δ 172.87, 155.87, 153.92, 143.63, 141.24, 127.71, 127.06, 125.02, 119.90, 70.98, 70.63, 70.59, 70.56, 70.53, 70.45, 69.46, 68.08, 49.88, 49.19, 47.02, 42.99, 41.55, 33.10, 23.26, 14.06, 13.28.

IR (thin film) 2873, 1743, 1666, 1451, 1421, 1351, 1269, 1143, 1107 cm<sup>-1</sup>.

HRMS (ESI) calcd for C<sub>39</sub>H<sub>58</sub>N<sub>3</sub>O<sub>12</sub> [M+H]<sup>+</sup>: 760.4015, found: 760.4006.

## 7.2. Synthesis of 3,5-dimethylphenyl KAT 15

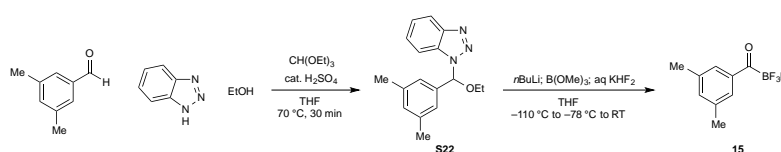

Scheme S6. Synthesis of 3,5-dimethylphenyl KAT 15

### Bt-ethoxy *N,O*-acetal S22

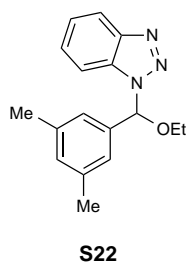

3,5-Dimethylbenzaldehyde<sup>12</sup> (2.75 g, 20.5 mmol, 1.00 equiv), benzotriazole (3.05 g, 25.6 mmol, 1.25 equiv), EtOH (2.40 mL, 41.0 mmol, 2.00 equiv), and triethylorthoformate (10.2 mL, 61.5 mmol, 3.00 equiv) were dissolved in THF (40 mL) at RT. To this solution was added H<sub>2</sub>SO<sub>4</sub> (10 drops), resulting in a white precipitate. The reaction was stirred at RT for 15 min, capped tightly with a plastic cap, and placed at 70 °C for 30 min. The reaction was cooled to RT, and 1.0 g solid NaHCO<sub>3</sub> was added and the heterogeneous solution was concentrated. The residue was purified by flash column chromatography (hexanes/EtOAc 10:1) to give **S22** (4.35 g, 75% yield) as a colorless oil.

<sup>1</sup>H NMR (400 MHz, CDCl<sub>3</sub>) δ 8.08-8.04 (m, 1H), 7.38-7.30 (m, 3H), 7.13 (s, 1H), 7.06-7.05 (m, 2H), 6.97-6.95 (m, 1H), 3.72 (dq, *J* = 9.5, 7.0 Hz, 1H), 3.45 (dq, *J* = 9.5, 7.0 Hz, 1H), 2.27 (s, 6H), 1.24

(t,  $J = 7.0$  Hz, 3H).

$^{13}\text{C}$  NMR (100 MHz,  $\text{CDCl}_3$ )  $\delta$  146.93, 138.17, 136.25, 131.11, 130.57, 127.31, 124.08, 123.57, 119.80, 111.77, 89.68, 64.94, 21.30, 14.67.

IR (thin film) 2977, 2918, 1609, 1449, 1331, 1274, 1163, 1104, 1085  $\text{cm}^{-1}$ .

HRMS (ESI) calcd for  $\text{C}_{17}\text{H}_{19}\text{N}_3\text{NaO}$   $[\text{M}+\text{Na}]^+$ : 304.1420, found: 304.1423.

### 3,5-Dimethylphenyl KAT 15

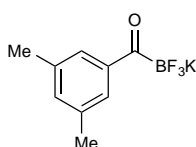

15

*Note: this reaction was conducted under  $\text{N}_2$  atmosphere.* In a 500 mL flask, **S22** (3.85 g, 13.7 mmol, 1.10 equiv) was dissolved in dry THF (88 mL) at RT. The flask was placed in a dry ice/acetone bath which was cooled with liq.  $\text{N}_2$  until solidification of acetone (ca.  $-110$  °C) and stirred for 15 min. *n*-BuLi (1.6 M in hexane, 8.1 mL, 12.5 mmol, 1.00 equiv) was added slowly down the side of the flask over 5 min. During this time, an intense green color developed. The solution was stirred for 2 min following the end of *n*-BuLi addition, and neat  $\text{B}(\text{OMe})_3$  (2.90 mL, 24.9 mmol, 2.00 equiv) was added slowly over 2 min directly into the solution. The deep green color gradually became brownish yellow after ca. 10 min of stirring. The flask was kept in the dry ice/acetone bath for 1 h, which slowly warmed to  $-78$  °C, and the color of the reaction mixture became nearly colorless. The flask was removed from the bath, and with vigorous stirring, four portions of sat aq  $\text{KHF}_2$  were added (4 x 10 mL, 40 mL total). As the reaction warmed, a biphasic mixture consisting of a milky white aqueous layer and a yellow organic layer formed. This was stirred overnight (16 h from the time of  $\text{KHF}_2$  addition) over which time the organic layer stayed yellow. The two layers were separated and the yellow organic phase was evaporated until some water remained. To the residual yellow wet slurry were added  $\text{Et}_2\text{O}$  (30 mL) and hexanes (10 mL), and the mixture was stirred at RT for 1 h. The resulting precipitates were filtered, washed with  $\text{Et}_2\text{O}$  (4 x 10 mL) and dried to give **15** (1.19 g, 40% yield) as a white solid.

$^1\text{H}$  NMR (600 MHz,  $\text{d}_6$ -acetone)  $\delta$  7.69-7.68 (m, 2H), 7.08-7.07 (m, 1H), 2.31-2.30 (m, 6H).

$^{13}\text{C}$  NMR (150 MHz,  $\text{d}_6$ -acetone)  $\delta$  236.03, 137.67, 133.29, 127.13, 127.12, 21.36.

$^{19}\text{F}$  NMR (470 MHz,  $\text{d}_6$ -acetone)  $\delta$   $-144.44$ .

$^{11}\text{B}$  NMR (160 MHz,  $\text{d}_6$ -acetone)  $\delta$   $-0.82$ .

IR (thin film) 2957, 2901, 1637, 1594, 1299, 1200  $\text{cm}^{-1}$ .

HRMS (ESI) calcd for  $\text{C}_9\text{H}_9\text{BF}_3\text{O}$   $[\text{M}-\text{K}]^-$ : 201.0706, found: 201.0707.



### 7.3. Synthesis of [2]Rotaxane **S23**

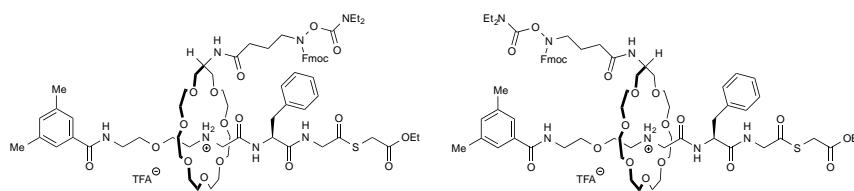

**S23**

3,5-Dimethylphenyl KAT **15** (0.13 g, 0.53 mmol, 1.1 equiv), crown ether **13** (0.37 g, 0.48 mmol, 1.0 equiv), and **3** (0.31 g, 0.48 mmol, 1.0 equiv) were dissolved in CH<sub>3</sub>CN (2.4 mL), and HBF<sub>4</sub>•OEt<sub>2</sub> (135 μL, 0.96 mmol, 2.0 equiv) was added. The mixture was stirred at RT for 16 h. The reaction was quenched with H<sub>2</sub>O. The crude material was purified by preparative HPLC using a YMC C18 column with a gradient of 40 to 95% CH<sub>3</sub>CN with 0.1% TFA in 38 min. The pure product fractions were pooled and lyophilized to obtain 91 mg of **S23** (14% yield) as a mixture of diastereomers.

In the same purification, the peaks containing axle **S24** were also collected, and these fractions were pooled and lyophilized. The lyophilizates were repurified by preparative HPLC using a YMC C18 column with a gradient of 20 to 95% CH<sub>3</sub>CN with 0.1% TFA in 28 min. The pure product fractions were pooled and lyophilized to obtain 114 mg of **S24** (34% yield).

<sup>1</sup>H NMR (600 MHz, CDCl<sub>3</sub>) δ 9.88 (d, *J* = 8.8 Hz, 1H x 0.55), 9.59 (d, *J* = 8.8 Hz, 1H x 0.45), 9.04 (t, *J* = 6.0 Hz, 1H x 0.45), 8.80 (t, *J* = 6.0 Hz, 1H x 0.45), 7.75-7.73 (m, 2H), 7.66-7.43 (m, 4H), 7.40-7.37 (m, 2H), 7.35-7.32 (m, 2H), 7.31-7.27 (m, 4H), 7.21-7.17 (m, 2H), 7.14-7.09 (m, 2H + 1H x 0.55), 6.95-6.93 (m, 1H), 6.59 (d, *J* = 8.5 Hz, 1H x 0.45), 4.90-4.83 (m, 1H), 4.43 (dd, *J* = 14.0, 7.0 Hz, 2H), 4.25-4.19 (m, 2H), 4.17-3.98 (m, 5H), 3.93-3.72 (m, 1H), 3.72-3.28 (m, 45H), 3.01-2.93 (m, 1H), 2.32-2.24 (m, 8H), 1.95-1.88 (m, 2H), 1.26-1.22 (m, 3H), 1.18-1.15 (m, 6H).

<sup>13</sup>C NMR (150 MHz, CDCl<sub>3</sub>) δ 196.10, 196.08, 173.13, 172.91, 172.72, 172.25, 168.60, 168.57, 168.55, 168.53, 165.78, 165.57, 161.20 (q, *J* = 35.7 Hz), 156.09, 155.87, 153.99, 153.97, 143.68, 143.53, 141.24, 141.23, 138.16, 138.13, 137.90, 134.74, 134.63, 133.10, 133.07, 129.40, 129.36, 128.19, 128.10, 127.79, 127.68, 127.07, 126.27, 126.06, 125.10, 124.97, 124.66, 119.97, 119.88, 116.40 (q, *J* = 292 Hz), 71.37, 71.32, 71.28, 71.15, 71.03, 71.01, 70.96, 70.90, 70.86, 70.84, 70.83, 70.80, 70.78, 70.75, 70.64, 70.60, 70.52, 70.51, 69.88, 69.76, 69.43, 69.39, 68.79, 68.73, 68.21, 68.19, 66.12, 66.03, 61.71, 61.68, 56.01, 55.84, 49.94, 49.69, 49.02, 49.00, 48.97, 48.27, 47.84, 47.13, 47.02, 46.96, 46.90, 43.06, 43.00, 41.59, 39.56, 39.41, 38.02, 37.95, 33.08, 33.00, 30.86, 23.38, 23.25, 21.22, 21.20, 14.04, 14.03, 13.29.

IR (thin film) 2908, 1741, 1688, 1539, 1452, 1422, 1200, 1092 cm<sup>-1</sup>.

HRMS (MALDI) calcd for C<sub>69</sub>H<sub>98</sub>N<sub>7</sub>O<sub>19</sub>S [M+H-TFA]<sup>+</sup>: 1360.6633, found: 1360.6612.

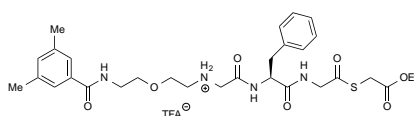

**S24**

**<sup>1</sup>H NMR** (400 MHz, CDCl<sub>3</sub>) δ 8.39 (d, *J* = 8.4 Hz, 1H), 8.26 (t, *J* = 6.5 Hz, 1H), 7.40 (s, 2H), 7.29 (br s, 1H), 7.21-7.11 (m, 5H), 7.08 (s, 1H), 4.77-4.71 (m, 1H), 4.11 (q, *J* = 7.2 Hz, 2H), 4.08-3.96 (m, 3H), 3.72-3.53 (m, 9H), 3.15 (dd, *J* = 14.0, 5.2 Hz, 1H), 3.08-3.00 (m, 2H), 2.86 (dd, *J* = 14.0, 9.3 Hz, 1H), 2.29 (s, 6H), 1.23 (t, *J* = 7.2 Hz, 3H).

**<sup>13</sup>C NMR** (100 MHz, CDCl<sub>3</sub>) δ 195.95, 171.89, 169.13, 168.85, 165.60, 162.02 (q, *J* = 34.3 Hz), 138.23, 136.45, 133.99, 133.27, 129.25, 128.46, 126.89, 124.92, 116.43 (q, *J* = 293 Hz), 70.22, 65.53, 62.15, 55.14, 48.80, 48.40, 47.29, 39.75, 37.82, 30.94, 21.10, 13.97.

$[\alpha]_D^{26} = -12.2^\circ$  (c 0.32, CHCl<sub>3</sub>)

**IR** (thin film) 3065, 2926, 1670, 1543, 1303, 1200, 1134 cm<sup>-1</sup>.

**HRMS** (ESI) calcd for C<sub>30</sub>H<sub>41</sub>N<sub>4</sub>O<sub>7</sub>S [M+H-TFA]<sup>+</sup>: 601.2690, found: 601.2687.

#### 7.4. Comparison of thermal stability of [2]rotaxanes

Initially, we have prepared [2]rotaxane **S25** using 4-fluorophenyl KAT **1** as a capping agent. Although **S25** was isolated and characterized by HRMS (MALDI), we found that **S25** was thermally unstable. **S25** gradually underwent deslippage under the KAHA ligation reaction condition (60 °C, DMSO/H<sub>2</sub>O (6:4), 0.1 M oxalic acid). On the other hand, [2]rotaxane **S23** did not show deslippage under the same condition.

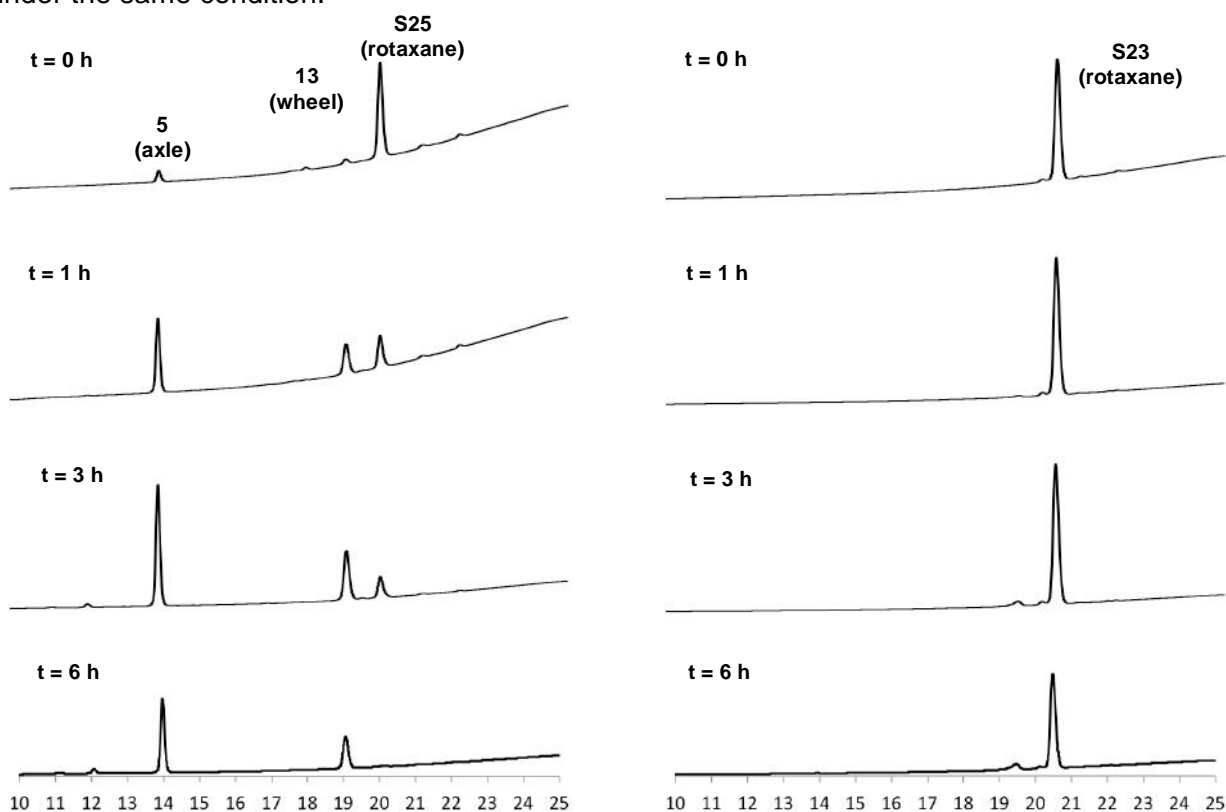

**Figure S23.** Comparison of thermal stability of [2]rotaxanes **S25** and **S23**

**[2]Rotaxane S25**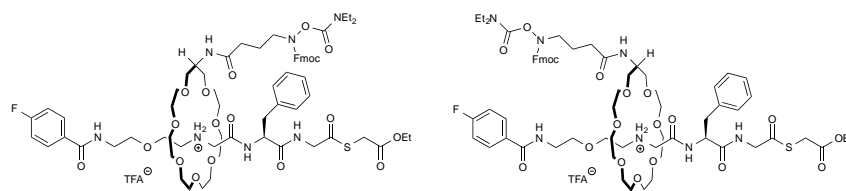**S25**

4-Fluorophenyl KAT **1** (0.26 g, 1.1 mmol, 1.2 equiv), crown ether **13** (0.72 g, 0.95 mmol, 1.0 equiv), and **3** (0.47 g, 0.95 mmol, 1.0 equiv) were dissolved in CH<sub>3</sub>CN (4.8 mL), and HBF<sub>4</sub>•OEt<sub>2</sub> (264 μL, 1.9 mmol, 2.0 equiv) was added. The mixture was stirred at RT for 16 h. The reaction was quenched with H<sub>2</sub>O. The crude material was purified by preparative HPLC using a YMC C18 column with a gradient of 40 to 95% CH<sub>3</sub>CN with 0.1% TFA in 38 min. The pure product fractions were pooled and lyophilized to obtain 78 mg of **S25** (6% yield) as a mixture of diastereomers. Analytical HPLC and HRMS were used to confirm the purity and exact mass of the product.

**HRMS** (MALDI) calcd for C<sub>67</sub>H<sub>93</sub>FN<sub>7</sub>O<sub>19</sub>S [M+H–TFA]<sup>+</sup>: 1350.6225, found: 1350.6222.

40 to 95% CH<sub>3</sub>CN in 17 min with 0.1% TFA

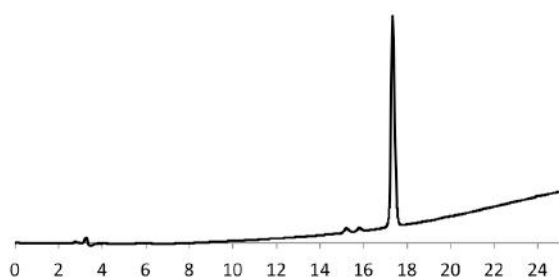**Fig. S24.** Analytical HPLC of purified **S25**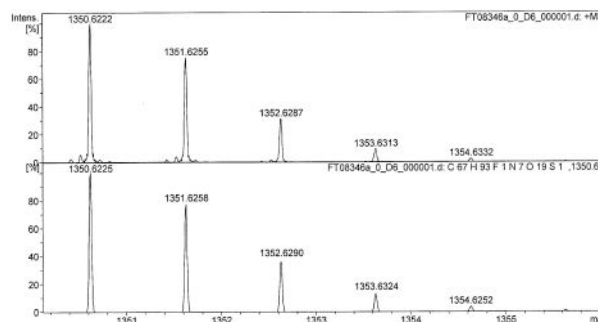**Fig. S25.** HRMS (MALDI) of measured (top) and calculated (bottom) isotopic pattern of **S25**

**Note:** Products derived from [2]rotaxane **S23** were obtained as a mixture of diastereomers. For simplicity, structures of one of the diastereomers are shown in the following sections.

**7.5. Synthesis of lasso peptide L2****Peptido[2]rotaxane S26**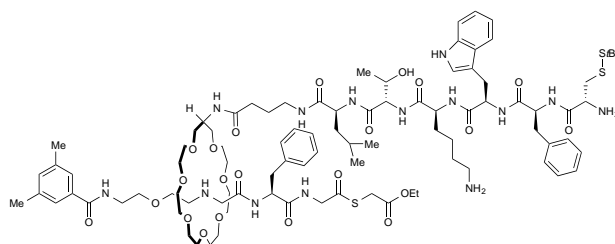**S26**

To a solution of rotaxane **S23** (16 mg, 12 μmol, 1.0 equiv) in DMSO (95 μL) was added Et<sub>2</sub>NH (5 μL), and the mixture was incubated at RT for 4 min and directly added to a solution of peptide α-ketoacid **7** (13 mg, 14 μmol, 1.2 equiv) in DMSO/H<sub>2</sub>O (6:4, 360 μL, 0.1 M oxalic acid). The resulting

mixture was incubated at 60 °C for 16 h and cooled to RT. Purification was performed by preparative HPLC using YMC C18 column (20 x 250 mm) with a gradient of 20 to 95% CH<sub>3</sub>CN with 0.1% TFA in 28 min. The pure product fractions were pooled and lyophilized to obtain 11 mg of **S26** (51% yield for deprotection and KAHA ligation steps). Analytical HPLC and HRMS were used to confirm the purity and exact mass of the product.

**HRMS** (MALDI) calcd for C<sub>92</sub>H<sub>140</sub>N<sub>14</sub>NaO<sub>22</sub>S<sub>3</sub> [M+Na]<sup>+</sup>: 1911.9321, found: 1911.9320.

t = 16 h

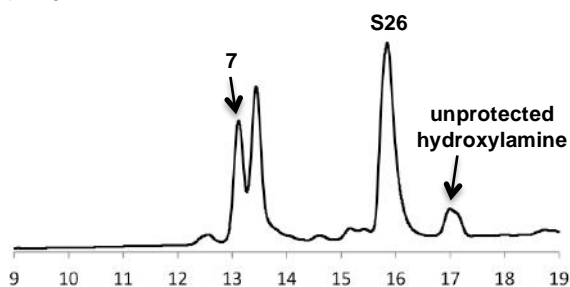

**Fig. S26.** HPLC monitoring of the KAHA ligation to form **S26**

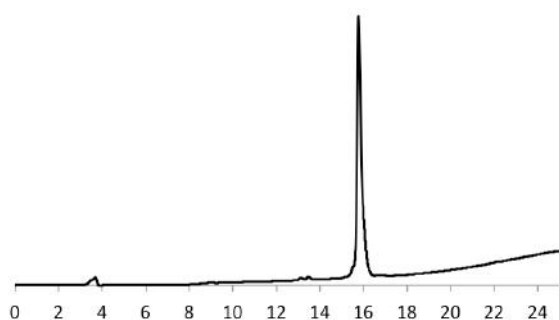

**Fig. S27.** Analytical HPLC of purified **S26**

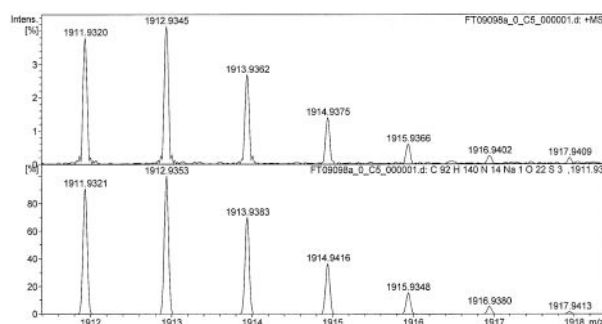

**Fig. S28.** HRMS (MALDI) of measured (top) and calculated (bottom) isotopic pattern of **S26**

## Lasso peptide **S27**

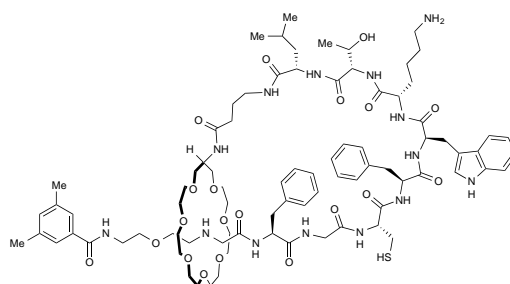

**S27**

4-Mercaptophenylacetic acid (14 mg, 81 μmol, 10 equiv) and TCEP-HCl (46 mg, 162 μmol, 20 equiv) were dissolved in 0.25 M sodium phosphate buffer (pH 8.0)/CH<sub>3</sub>CN (1:1, 2.1 mL), and pH of this solution was adjusted to 7.4 by adding 1 M aq NaOH. A solution of **S26** (15 mg, 8.1 μmol, 1.0 equiv) in 0.1 M sodium phosphate buffer (pH 7.4)/CH<sub>3</sub>CN (1:1, 0.40 mL) was prepared, and a portion (100 μL) of this solution was added to the ligation buffer. The mixture was incubated at RT

for 15 min, and the next portion (100  $\mu$ L) of the solution of **S26** was added to the mixture. This addition-incubation process was repeated every 15 minutes. After complete addition, the mixture was further incubated at RT for 1 h and purified by preparative HPLC using YMC C18 column (20 x 250 mm) with a gradient of 20 to 95% CH<sub>3</sub>CN with 0.1% TFA in 28 min. The pure product fractions were pooled and lyophilized to obtain 5.3 mg of **S27** (39% yield). Analytical HPLC and HRMS were used to confirm the purity and exact mass of the product.

**HRMS** (MALDI) calcd for C<sub>84</sub>H<sub>125</sub>N<sub>14</sub>O<sub>20</sub>S [M+H]<sup>+</sup>: 1681.8910, found: 1681.8904.

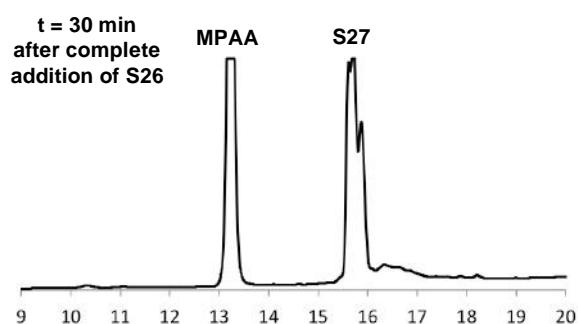

**Fig. S29.** HPLC monitoring of the NCL to form **S27**

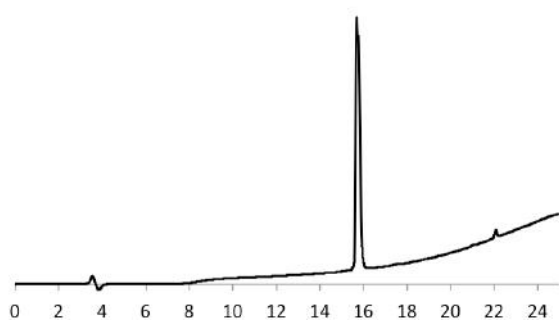

**Fig. S30.** Analytical HPLC of purified **S27**

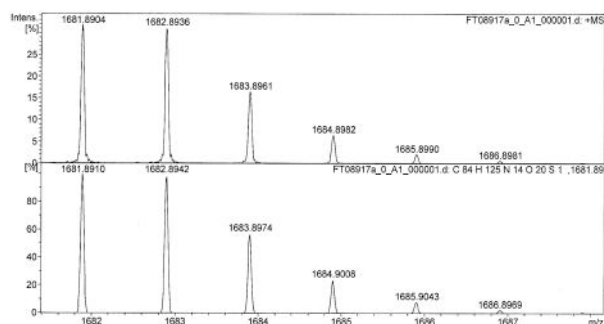

**Fig. S31.** HRMS (MALDI) of measured (top) and calculated (bottom) isotopic pattern of **S27**

## Cys-alkylated lasso peptide L2

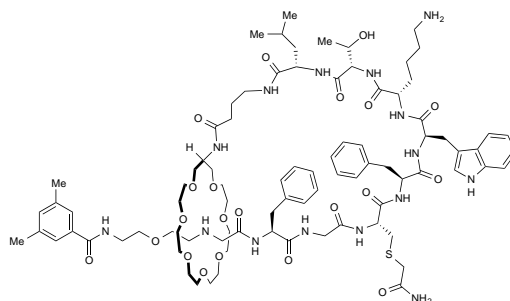

**L2**

To a solution of **S27** (5.3 mg, 3.2  $\mu$ mol, 1.0 equiv) in 0.1 M sodium phosphate buffer (pH 7.4)/CH<sub>3</sub>CN (1:1, 255  $\mu$ L) was added a solution of iodoacetamide (0.65 mg, 3.5  $\mu$ mol, 1.1 equiv) in 0.1 M sodium phosphate buffer (pH 7.4)/CH<sub>3</sub>CN (1:1, 65  $\mu$ L). The mixture was incubated at RT for 40 min and purified by preparative HPLC using YMC C18 column (20 x 250 mm) with a gradient of

20 to 95% CH<sub>3</sub>CN with 0.1% TFA in 28 min. The pure product fractions were pooled and lyophilized to obtain 3.7 mg of **L2** (66% yield). Analytical HPLC and HRMS were used to confirm the purity and exact mass of the product.

**HRMS** (MALDI) calcd for C<sub>86</sub>H<sub>128</sub>N<sub>15</sub>O<sub>21</sub>S [M+H]<sup>+</sup>: 1738.9124, found: 1738.9098.

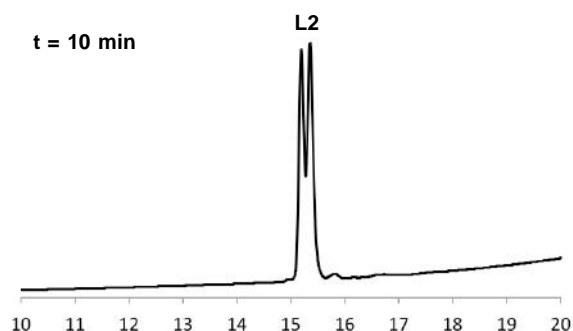

**Fig. S32.** HPLC monitoring of the cysteine alkylation to form **L2**

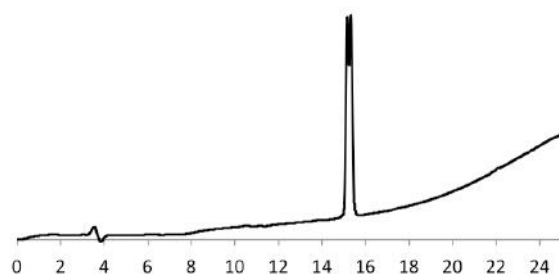

**Fig. S33.** Analytical HPLC of purified **L2**

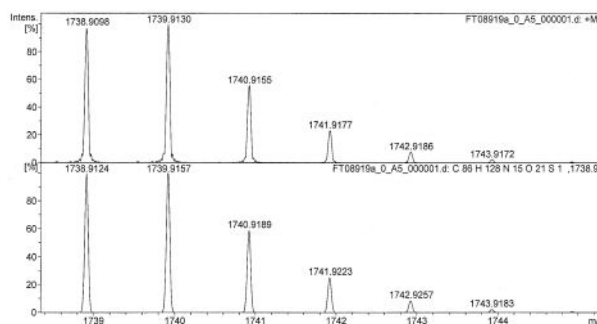

**Fig. S34.** HRMS (MALDI) of measured (top) and calculated (bottom) isotopic pattern of **L2**

## 8. Synthesis of branched-cyclic peptide **B2**

### KAHA ligation product **S28**

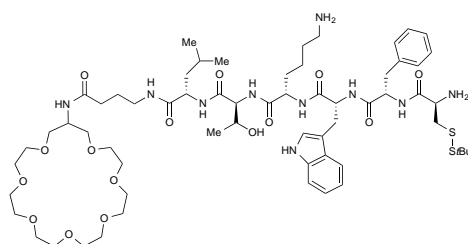

**S28**

To a solution of crown ether **13** (16 mg, 21 μmol, 2.0 equiv) in DMSO (76 μL) was added Et<sub>2</sub>NH (4.0 μL), and the mixture was incubated at RT for 4 min and directly added to a solution of peptide α-ketoacid **7** (9.6 mg, 11 μmol, 1.0 equiv) in DMSO/H<sub>2</sub>O (6:4, 220 μL, 0.1 M oxalic acid). The resulting mixture was incubated at 60 °C for 20 h and cooled to RT. Purification was performed by preparative HPLC using YMC C18 column (20 x 250 mm) with a gradient of 20 to 95% CH<sub>3</sub>CN with 0.1% TFA in 28 min. The pure product fractions were pooled and lyophilized to obtain 5.6 mg of **S28** (41% yield for deprotection and KAHA ligation steps). Analytical HPLC and HRMS were used

to confirm the purity and exact mass of the product.

**HRMS (MALDI)** calcd for  $C_{62}H_{101}N_{10}O_{15}S_2$   $[M+H]^+$ : 1289.6884, found: 1289.6881.

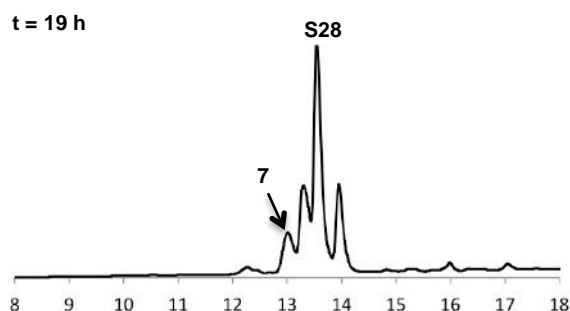

**Fig. S35.** HPLC monitoring of the KAHA ligation to form **S28**

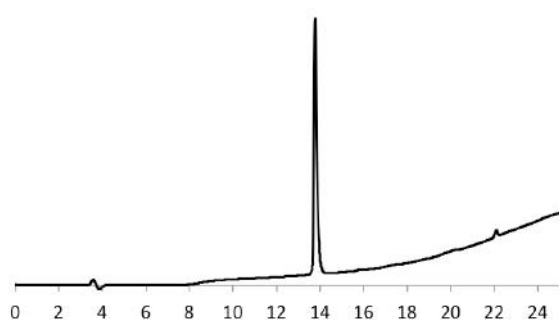

**Fig. S36.** Analytical HPLC of purified **S28**

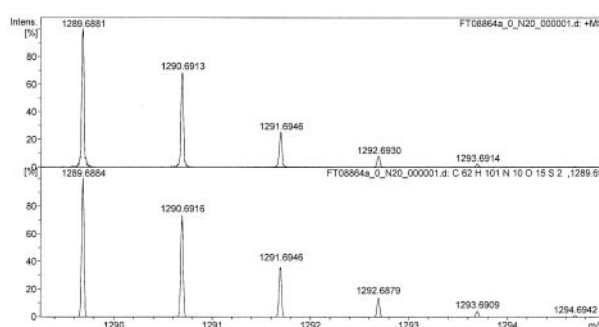

**Fig. S37.** HRMS (MALDI) of measured (top) and calculated (bottom) isotopic pattern of **S28**

### NCL product **S29**

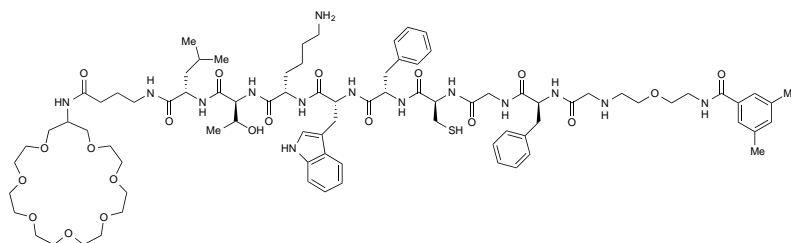

**S29**

4-Mercaptophenylacetic acid (7.3 mg, 43  $\mu$ mol, 10 equiv) and TCEP-HCl (24.9 mg, 68  $\mu$ mol, 20 equiv) were dissolved in 0.25 M sodium phosphate buffer (pH 8.0)/ $CH_3CN$  (1:1, 0.60 mL), and pH of this solution was adjusted to 7.4 by adding 1 M aq NaOH. To this ligation buffer were added a solution of **S28** (5.6 mg, 4.3  $\mu$ mol, 1.0 equiv) in 0.1 M sodium phosphate buffer (pH 7.4)/ $CH_3CN$  (1:1, 0.40 mL) followed by a solution of axle-thioester **S24** (2.9 mg, 4.7  $\mu$ mol, 1.1 equiv) in  $CH_3CN$  (0.10 mL), and the mixture was incubated at RT for 1.5 h. Purification was performed by preparative HPLC using YMC C18 column (20 x 250 mm) with a gradient of 20 to 95%  $CH_3CN$  with 0.1% TFA in 28 min. The pure product fractions were pooled and lyophilized to obtain 4.5 mg of **S29** (63% yield). Analytical HPLC and HRMS were used to confirm the purity and exact mass of the product.

**HRMS (MALDI)** calcd for  $C_{84}H_{125}N_{14}O_{20}S$   $[M+H]^+$ : 1681.8910, found: 1681.8901.

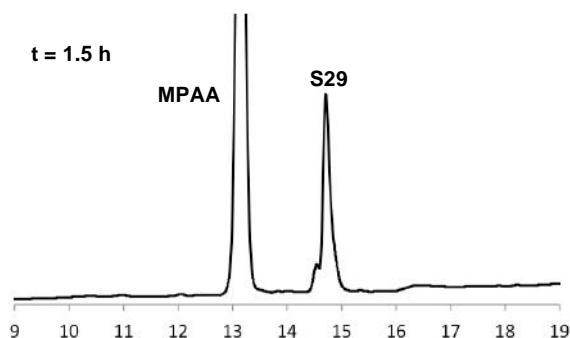

**Fig. S38.** HPLC monitoring of the NCL to form **S29**

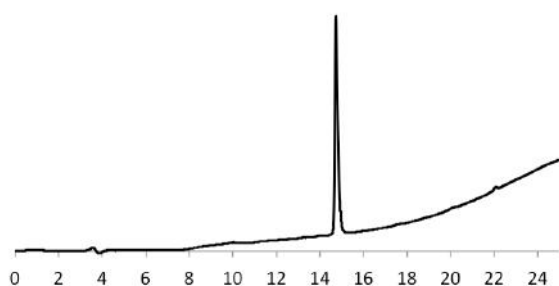

**Fig. S39.** Analytical HPLC of purified **S29**

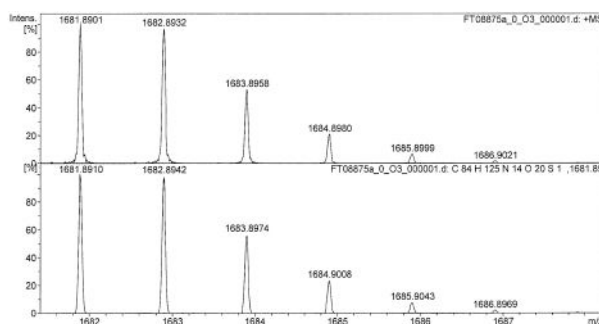

**Fig. S40.** HRMS (MALDI) of measured (top) and calculated (bottom) isotopic pattern of **S29**

## Branched-cyclic peptide **B2**

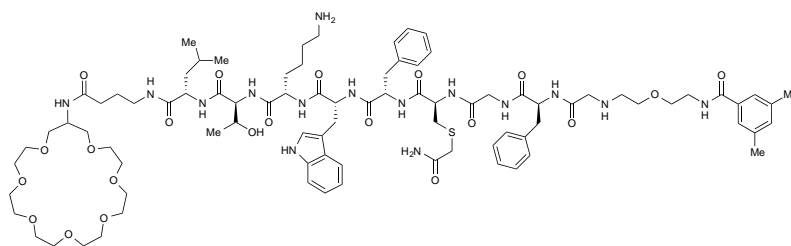

**B2**

To a solution of **S29** (4.5 mg, 2.7  $\mu$ mol, 1.0 equiv) in 0.1 M sodium phosphate buffer (pH 7.4)/ $CH_3CN$  (1:1, 211  $\mu$ L) was added a solution of iodoacetamide (0.59 mg, 3.0  $\mu$ mol, 1.2 equiv) in  $CH_3CN$  (59  $\mu$ L). The mixture was incubated at RT for 1.5 h and purified by preparative HPLC using YMC C18 column (20 x 250 mm) with a gradient of 20 to 95%  $CH_3CN$  with 0.1% TFA in 28 min. The pure product fractions were pooled and lyophilized to obtain 3.3 mg of **B2** (70% yield). Analytical HPLC and HRMS were used to confirm the purity and exact mass of the product.

**HRMS (MALDI)** calcd for  $C_{86}H_{128}N_{15}O_{21}S$   $[M+H]^+$ : 1738.9124, found: 1738.9110.



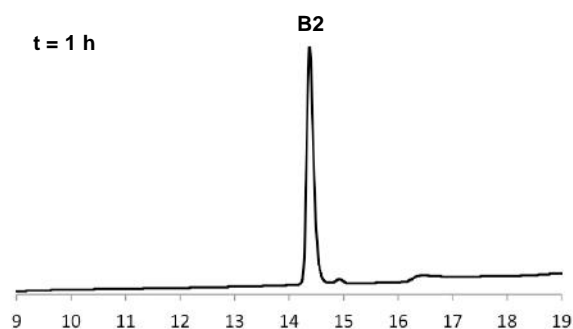

Fig. S41. HPLC monitoring of the cysteine alkylation to form **B2**

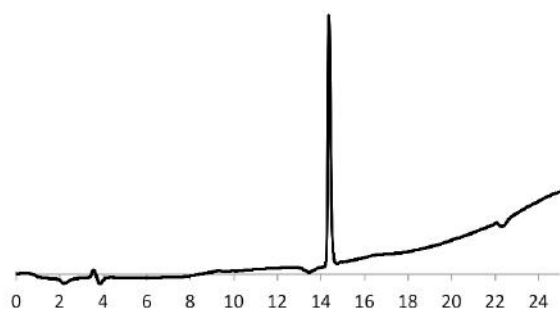

Fig. S42. Analytical HPLC of purified **B2**

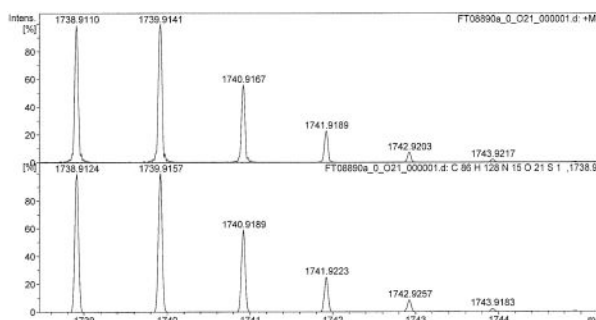

Fig. S43. HRMS (MALDI) of measured (top) and calculated (bottom) isotopic pattern of **B2**

## 9. Synthesis of lasso peptide **L3**

### 9.1. Synthesis of [2]rotaxane **S30**

#### Crown ether-*N*-Fmoc hydroxylamine **14**

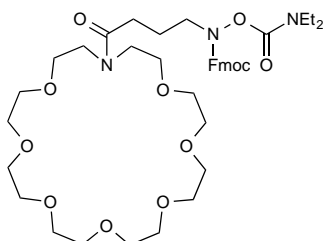

**14**

**S14** (0.61 g, 1.4 mmol, 1.1 equiv), HCTU (0.57 g, 1.4 mmol, 1.1 equiv), and NMM (275  $\mu$ L, 2.5 mmol, 2.0 equiv) were premixed in DMF (1.5 mL). 1-Aza-24-crown-8<sup>13</sup> (0.44 g, 1.3 mmol, 1.0 equiv) in DMF (1.0 mL) was added, and the mixture was stirred at RT for 1h. The reaction was diluted with DCM, and 1 M aq HCl was added. The aqueous phase was extracted with DCM (3x). The combined organic phases were washed with H<sub>2</sub>O, dried over Na<sub>2</sub>SO<sub>4</sub>, filtered and concentrated under reduced pressure. The residue was purified by preparative RP-HPLC using YMC C18 column (20 x 250 mm) with a gradient of 20 to 95% CH<sub>3</sub>CN with 0.1% TFA in 28 min. The pure product fractions were pooled and lyophilized to obtain 0.29 g of **14** (30% yield) as a pale yellow oil.

<sup>1</sup>H NMR (400 MHz, CDCl<sub>3</sub>)  $\delta$  7.74 (d, *J* = 7.5 Hz, 2H), 7.58 (d, *J* = 7.4 Hz, 2H), 7.38 (t, *J* = 7.4 Hz,

2H), 7.29 (td,  $J = 7.4$  Hz, 2H), 4.45 (d,  $J = 7.2$  Hz, 2H), 4.23 (t,  $J = 7.0$  Hz, 1H), 3.73 (t,  $J = 6.9$  Hz, 2H), 3.66-3.55 (m, 32H), 3.32 (t,  $J = 7.5$  Hz, 4H), 2.50 (t,  $J = 7.5$  Hz, 2H), 1.95 (p,  $J = 7.1$  Hz, 2H), 1.17 (t,  $J = 7.1$  Hz, 6H).

$^{13}\text{C}$  NMR (100 MHz,  $\text{CDCl}_3$ )  $\delta$  173.52, 155.96, 153.95, 143.63, 141.22, 127.69, 127.05, 125.04, 119.89, 70.80, 70.69, 70.66, 70.64, 70.58, 70.48, 70.43, 69.62, 69.38, 68.20, 50.08, 49.21, 47.12, 46.99, 42.99, 41.55, 29.92, 22.77, 14.04, 13.26.

IR (thin film) 2935, 2873, 1744, 1642, 1451, 1421, 1350, 1144, 1111  $\text{cm}^{-1}$ .

HRMS (ESI) calcd for  $\text{C}_{40}\text{H}_{60}\text{N}_3\text{O}_{12}$   $[\text{M}+\text{H}]^+$ : 774.4172, found: 774.4157.

## [2]Rotaxane **S30**

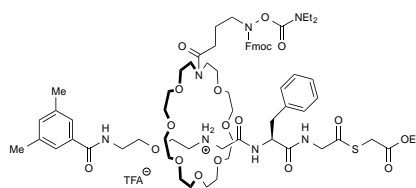

**S30**

3,5-Dimethylphenyl KAT **15** (98 mg, 0.41 mmol, 1.1 equiv), crown ether **14** (0.29 g, 0.37 mmol, 1.0 equiv), and **3** (0.24 g, 0.37 mmol, 1.0 equiv) were dissolved in  $\text{CH}_3\text{CN}$  (1.9 mL), and  $\text{HBF}_4 \cdot \text{OEt}_2$  (104  $\mu\text{L}$ , 0.82 mmol, 2.0 equiv) was added. The mixture was stirred at RT for 16 h. The reaction was quenched with  $\text{H}_2\text{O}$ . The crude material was purified by preparative HPLC using a YMC C18 column with a gradient of 40 to 95%  $\text{CH}_3\text{CN}$  with 0.1% TFA in 38 min. The pure product fractions were pooled and lyophilized to obtain 63 mg of **S30** (12% yield).

In the same purification, the peaks containing axle **S24** were also collected, and these fractions were pooled and lyophilized. The lyophilizates were repurified by preparative HPLC using a YMC C18 column with a gradient of 20 to 95%  $\text{CH}_3\text{CN}$  with 0.1% TFA in 28 min. The pure product fractions were pooled and lyophilized to obtain 93 mg of **S24** (36% yield).

$^1\text{H}$  NMR (600 MHz,  $\text{CDCl}_3$ )  $\delta$  9.53 (dd,  $J = 22.9, 8.1$  Hz, 1H), 8.77-8.73 (m, 1H), 7.73 (d,  $J = 7.6$  Hz, 2H), 7.63-7.59 (m, 1H), 7.57-7.56 (m, 2H), 7.52-7.47 (m, 1H), 7.37 (t,  $J = 7.5$  Hz, 2H), 7.33-7.26 (m, 6H), 7.21-7.18 (m, 2H), 7.14-7.10 (m, 1H), 7.09-7.06 (m, 2H), 4.85-4.79 (m, 1H), 4.42 (d,  $J = 7.0$  Hz, 2H), 4.21 (t,  $J = 7.1$  Hz, 1H), 4.14-4.10 (m, 4H), 3.99-3.83 (m, 2H), 3.75-3.29 (m, 49H), 2.98-2.93 (m, 1H), 2.39-2.32 (m, 2H), 2.30 (s, 6H), 1.95-1.90 (m, 2H), 1.23 (t,  $J = 7.1$  Hz, 3H), 1.18-1.14 (m, 6H).

$^{13}\text{C}$  NMR (150 MHz,  $\text{CDCl}_3$ )  $\delta$  195.81, 195.79, 172.69, 172.65, 172.01, 171.97, 168.54, 168.43, 165.23, 165.21, 161.01 (q,  $J = 36.5$  Hz), 156.02, 153.89, 143.55, 143.54, 141.16, 138.05, 137.67, 137.63, 134.56, 134.55, 133.00, 129.26, 129.22, 128.20, 127.70, 127.02, 126.33, 126.30, 125.00, 124.69, 119.88, 116.23 (q,  $J = 292$  Hz), 71.32, 71.27, 71.06, 70.97, 70.95, 70.83, 70.80, 70.76, 70.74, 70.72, 70.68, 70.65, 70.62, 70.56, 70.51, 70.49, 70.47, 70.45, 70.42, 70.40, 69.78, 68.17, 65.76, 61.66, 55.95, 55.76, 50.04, 49.15, 48.92, 48.22, 48.18, 47.98, 47.95, 46.93, 46.63, 46.58,

42.96, 41.52, 39.40, 37.96, 37.94, 30.80, 29.67, 29.65, 22.53, 21.13, 14.05, 13.97, 13.25.

$[\alpha]_D^{26} = -5.8^\circ$  (c 0.70,  $\text{CHCl}_3$ )

IR (thin film) 2910, 1741, 1690, 1647, 1537, 1451, 1421, 1200, 1093  $\text{cm}^{-1}$ .

HRMS (MALDI) calcd for  $\text{C}_{70}\text{H}_{100}\text{N}_7\text{O}_{19}\text{S}$   $[\text{M}+\text{H}]^+$ : 1374.6789, found: 1374.6753.

## 9.2. Synthesis of lasso peptide L3

### Peptido[2]rotaxane S31

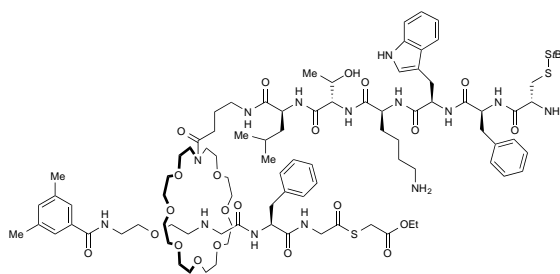

**S31**

To a solution of rotaxane **S30** (35 mg, 24  $\mu\text{mol}$ , 1.0 equiv) in DMSO (190  $\mu\text{L}$ ) was added  $\text{Et}_2\text{NH}$  (10  $\mu\text{L}$ ), and the mixture was incubated at RT for 4 min and directly added to a solution of peptide  $\alpha$ -ketoacid **7** (27 mg, 30  $\mu\text{mol}$ , 1.3 equiv) in DMSO/ $\text{H}_2\text{O}$  (6:4, 400  $\mu\text{L}$ , 0.1 M oxalic acid). The resulting mixture was incubated at 60  $^\circ\text{C}$  for 15 h and cooled to RT. Purification was performed by preparative HPLC using YMC C18 column (20 x 250 mm) with a gradient of 20 to 95%  $\text{CH}_3\text{CN}$  with 0.1% TFA in 28 min. The pure product fractions were pooled and lyophilized to obtain 13 mg of **S31** (29% yield for deprotection and KAHA ligation steps). Analytical HPLC and HRMS were used to confirm the purity and exact mass of the product.

HRMS (MALDI) calcd for  $\text{C}_{93}\text{H}_{143}\text{N}_{14}\text{O}_{22}\text{S}_3$   $[\text{M}+\text{H}]^+$ : 1903.9658, found: 1903.9656.

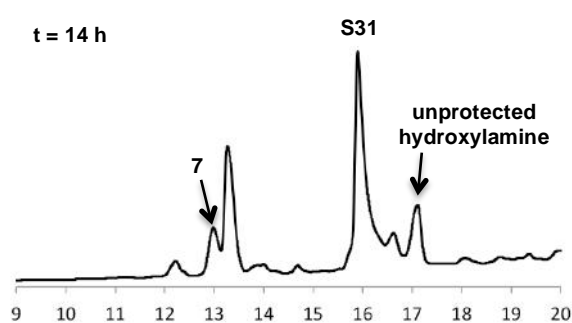

**Fig. S44.** HPLC monitoring of the KAHA ligation to form **S31**

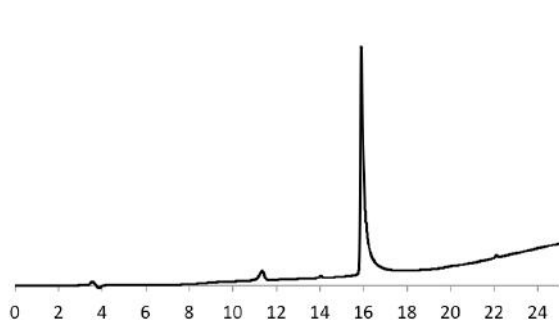

**Fig. S45.** Analytical HPLC of purified **S31**

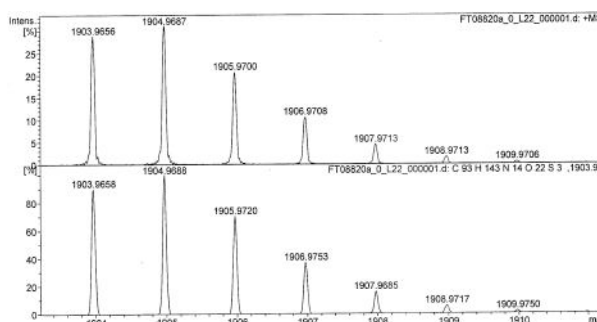

**Fig. S46.** HRMS (MALDI) of measured (top) and calculated (bottom) isotopic pattern of **S31**

### Lasso peptide **S32**

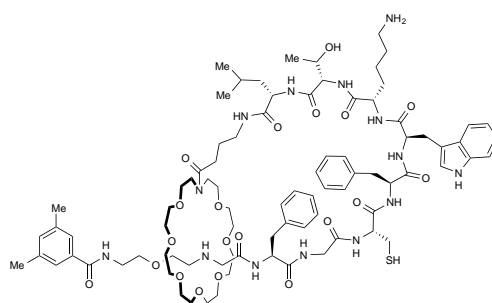

**S32**

4-Mercaptophenylacetic acid (11 mg, 63  $\mu\text{mol}$ , 10 equiv) and TCEP-HCl (36 mg, 126  $\mu\text{mol}$ , 20 equiv) were dissolved in 0.25 M sodium phosphate buffer (pH 8.0)/ $\text{CH}_3\text{CN}$  (1:1, 0.63 mL), and pH of this solution was adjusted to 7.5 by adding 1 M aq NaOH. A solution of **S31** (12 mg, 6.3  $\mu\text{mol}$ , 1.0 equiv) in 0.1 M sodium phosphate buffer (pH 7.4)/ $\text{CH}_3\text{CN}$  (1:1, 0.20 mL) was prepared, and a portion (20  $\mu\text{L}$ ) of this solution was added to the ligation buffer. The mixture was incubated at RT for 5 min, and the next portion (20  $\mu\text{L}$ ) of the solution of **S31** was added to the mixture. This addition-incubation process was repeated every 5 minutes. After complete addition, the mixture was further incubated at RT for 30 min and purified by preparative HPLC using YMC C18 column (20 x 250 mm) with a gradient of 20 to 95%  $\text{CH}_3\text{CN}$  with 0.1% TFA in 28 min. The pure product fractions were pooled and lyophilized to obtain 5.2 mg of **S32** (49% yield). Analytical HPLC and HRMS were used to confirm the purity and exact mass of the product.

**HRMS** (MALDI) calcd for  $\text{C}_{85}\text{H}_{127}\text{N}_{14}\text{O}_{20}\text{S}$   $[\text{M}+\text{H}]^+$ : 1695.9066, found: 1695.9068.

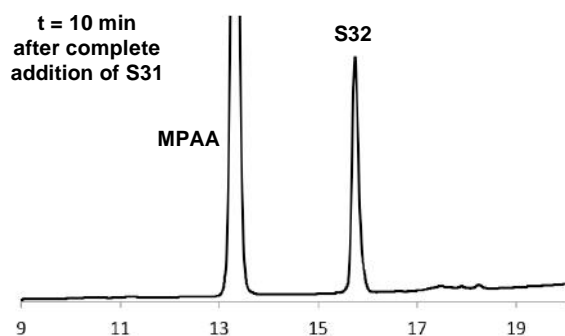

Fig. S47. HPLC monitoring of the NCL to form **S32**

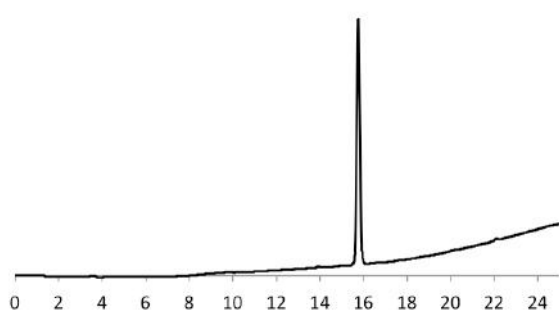

Fig. S48. Analytical HPLC of purified **S32**

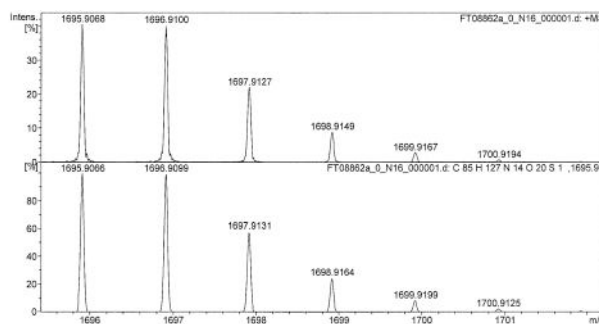

Fig. S49. HRMS (MALDI) of measured (top) and calculated (bottom) isotopic pattern of **S32**

### Cys-alkylated lasso peptide **L3**

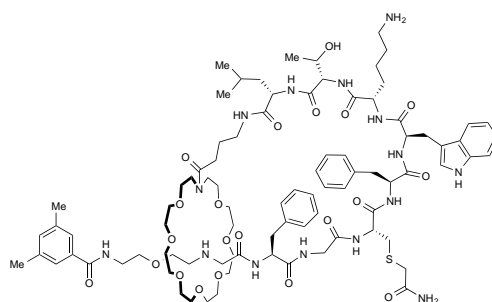

**L3**

To a solution of **S32** (7.1 mg, 4.2  $\mu\text{mol}$ , 1.0 equiv) in 0.1 M sodium phosphate buffer (pH 7.4)/ $\text{CH}_3\text{CN}$  (1:1, 327  $\mu\text{L}$ ) was added a solution of iodoacetamide (0.93 mg, 5.0  $\mu\text{mol}$ , 1.2 equiv) in  $\text{CH}_3\text{CN}$  (59  $\mu\text{L}$ ). The mixture was incubated at RT for 40 min and purified by preparative HPLC using YMC C18 column (20 x 250 mm) with a gradient of 20 to 95%  $\text{CH}_3\text{CN}$  with 0.1% TFA in 28 min. The pure product fractions were pooled and lyophilized to obtain 4.4 mg of **L3** (60% yield). Analytical HPLC and HRMS were used to confirm the purity and exact mass of the product.

**HRMS** (MALDI) calcd for  $\text{C}_{87}\text{H}_{130}\text{N}_{15}\text{O}_{21}\text{S}$   $[\text{M}+\text{H}]^+$ : 1752.9281, found: 1752.9265.

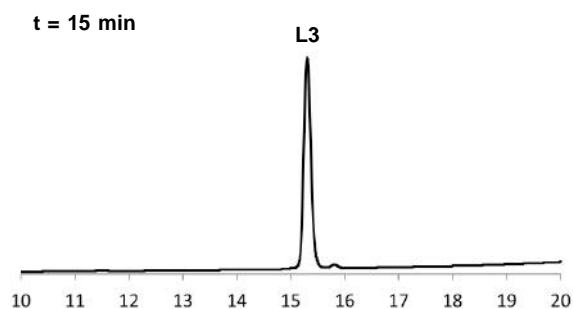

Fig. S50. HPLC monitoring of the cysteine alkylation to form L3

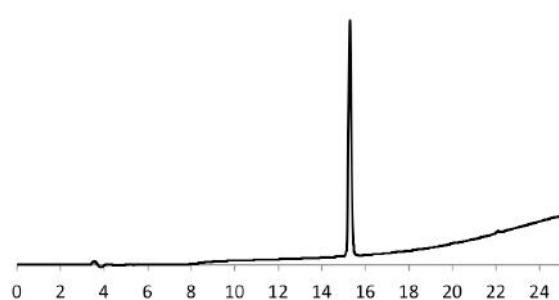

Fig. S51. Analytical HPLC of purified L3

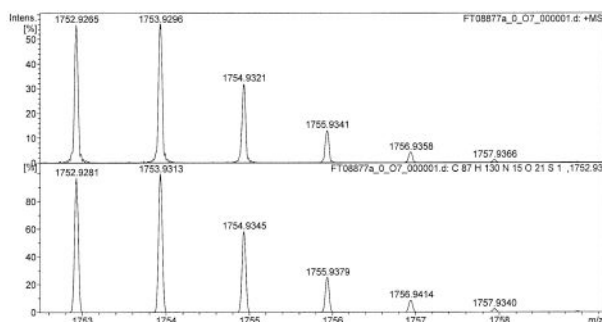

Fig. S52. HRMS (MALDI) of measured (top) and calculated (bottom) isotopic pattern of L3

## 10. Synthesis of branched-cyclic peptide B3

### KAHA ligation product S33

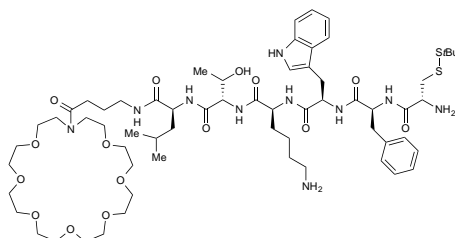

S33

To a solution of crown ether **14** (7.8 mg, 10  $\mu$ mol, 1.0 equiv) in DMSO (57  $\mu$ L) was added Et<sub>2</sub>NH (3.0  $\mu$ L), and the mixture was incubated at RT for 4 min and directly added to a solution of peptide  $\alpha$ -ketoacid **7** (11 mg, 12  $\mu$ mol, 1.2 equiv) in DMSO/H<sub>2</sub>O (6:4, 240  $\mu$ L, 0.1 M oxalic acid). The resulting mixture was incubated at 60  $^{\circ}$ C for 19 h and cooled to RT. Purification was performed by preparative HPLC using YMC C18 column (20 x 250 mm) with a gradient of 20 to 95% CH<sub>3</sub>CN with 0.1% TFA in 28 min. The pure product fractions were pooled and lyophilized to obtain 4.2 mg of **S33** (32% yield for deprotection and KAHA ligation steps). Analytical HPLC and HRMS were used to confirm the purity and exact mass of the product.

**HRMS** (MALDI) calcd for C<sub>63</sub>H<sub>103</sub>N<sub>10</sub>O<sub>15</sub>S<sub>2</sub> [M+H]<sup>+</sup>: 1303.7040, found: 1303.7036.

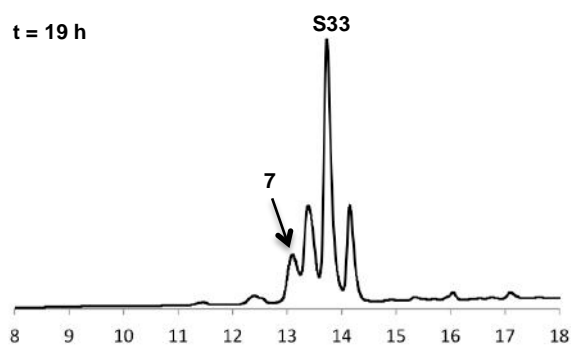

Fig. S53. HPLC monitoring of the KAHA ligation to form **S33**

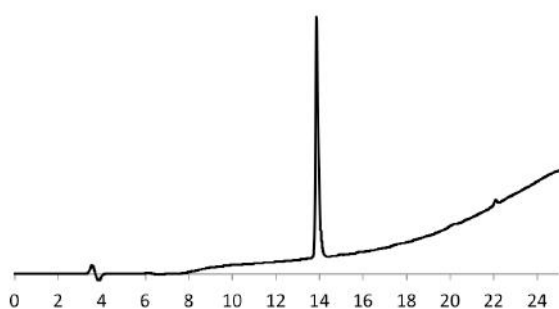

Fig. S54. Analytical HPLC of purified **S33**

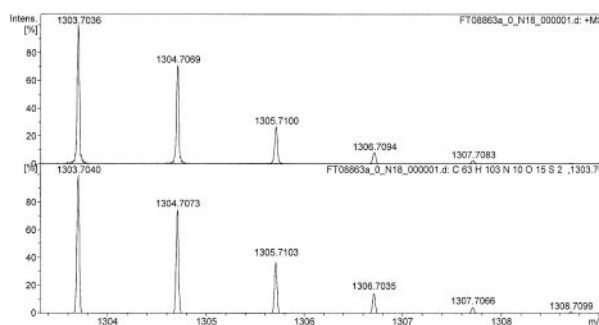

Fig. S55. HRMS (MALDI) of measured (top) and calculated (bottom) isotopic pattern of **S33**

## NCL product **S34**

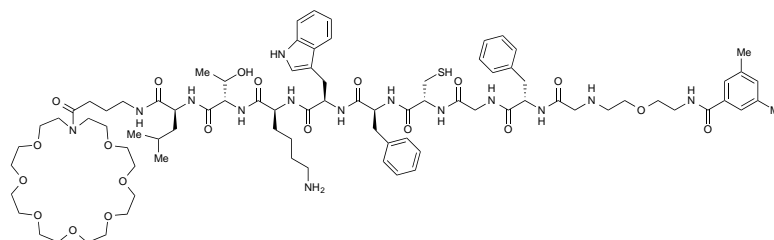

**S34**

4-Mercaptophenylacetic acid (5.4 mg, 32  $\mu\text{mol}$ , 10 equiv) and TCEP-HCl (18 mg, 64  $\mu\text{mol}$ , 20 equiv) were dissolved in 0.25 M sodium phosphate buffer (pH 8.0)/CH<sub>3</sub>CN (1:1, 0.50 mL), and pH of this solution was adjusted to 7.2 by adding 1 M aq NaOH. To this ligation buffer were added a solution of **S33** (4.2 mg, 3.2  $\mu\text{mol}$ , 1.0 equiv) in 0.1 M sodium phosphate buffer (pH 7.4)/CH<sub>3</sub>CN (1:1, 0.30 mL) followed by a solution of axle-thioester **S24** (2.1 mg, 3.5  $\mu\text{mol}$ , 1.1 equiv) in CH<sub>3</sub>CN (0.10 mL), and the mixture was incubated at RT for 1 h. Purification was performed by preparative HPLC using YMC C18 column (20 x 250 mm) with a gradient of 20 to 95% CH<sub>3</sub>CN with 0.1% TFA in 28 min. The pure product fractions were pooled and lyophilized to obtain 3.2 mg of **S34** (59% yield). Analytical HPLC and HRMS were used to confirm the purity and exact mass of the product.

**HRMS** (MALDI) calcd for C<sub>85</sub>H<sub>127</sub>N<sub>14</sub>O<sub>20</sub>S [M+H]<sup>+</sup>: 1695.9066, found: 1695.9051.

**S34**

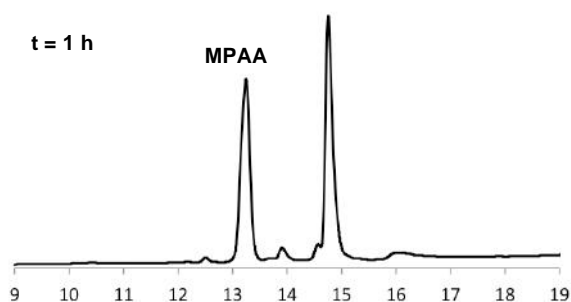

**Fig. S56.** HPLC monitoring of the NCL to form **S34**

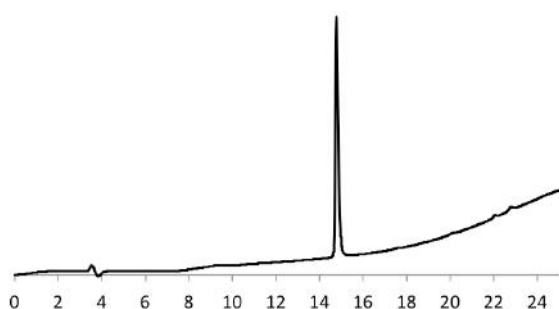

**Fig. S57.** Analytical HPLC of purified **S34**

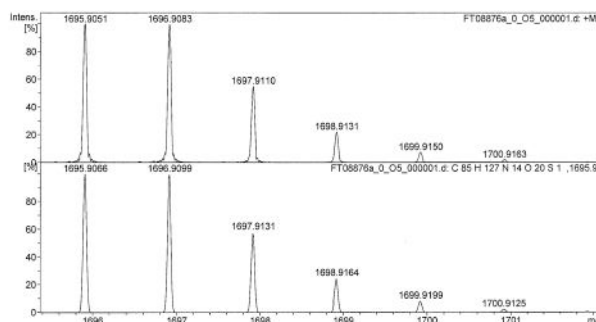

**Fig. S58.** HRMS (MALDI) of measured (top) and calculated (bottom) isotopic pattern of **S34**

### Branched-cyclic peptide **B3**

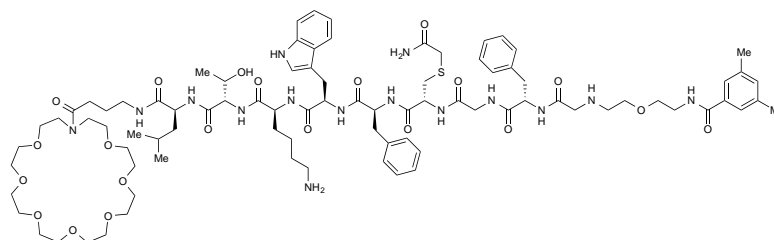

**B3**

To a solution of **S34** (3.2 mg, 1.9  $\mu\text{mol}$ , 1.0 equiv) in 0.1 M sodium phosphate buffer (pH 7.4)/ $\text{CH}_3\text{CN}$  (1:1, 148  $\mu\text{L}$ ) was added a solution of iodoacetamide (0.42 mg, 2.3  $\mu\text{mol}$ , 1.2 equiv) in  $\text{CH}_3\text{CN}$  (42  $\mu\text{L}$ ). The mixture was incubated at RT for 1.5 h and purified by preparative HPLC using YMC C18 column (20 x 250 mm) with a gradient of 20 to 95%  $\text{CH}_3\text{CN}$  with 0.1% TFA in 28 min. The pure product fractions were pooled and lyophilized to obtain 2.6 mg of **B3** (78% yield). Analytical HPLC and HRMS were used to confirm the purity and exact mass of the product.

**HRMS** (MALDI) calcd for  $\text{C}_{87}\text{H}_{130}\text{N}_{15}\text{O}_{21}\text{S}$   $[\text{M}+\text{H}]^+$ : 1752.9281, found: 1752.9272.



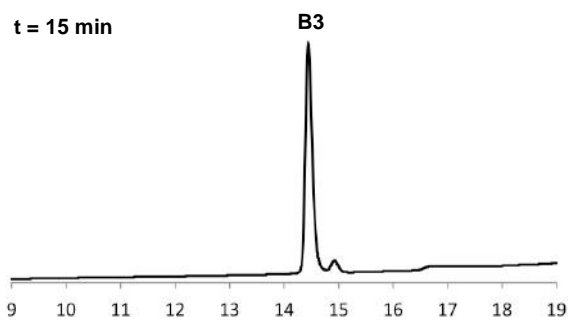

**Fig. S59.** HPLC monitoring of the cysteine alkylation to form **B3**

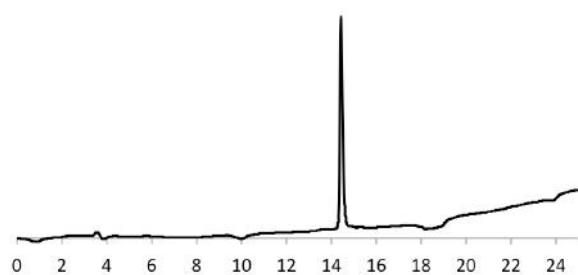

**Fig. S60.** Analytical HPLC of purified **B3**

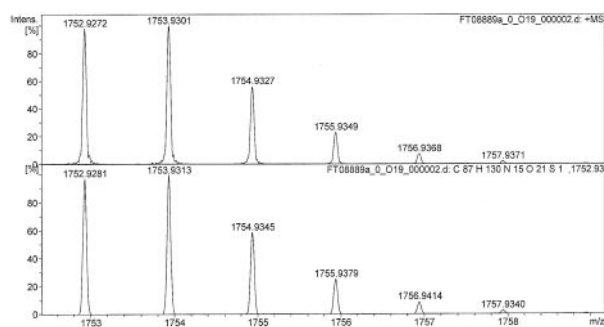

**Fig. S61.** HRMS (MALDI) of measured (top) and calculated (bottom) isotopic pattern of **B3**

## 11. Comparison of HPLC retention time

### 11.1. Lasso peptide **L1** vs Branched-cyclic peptide **B1**

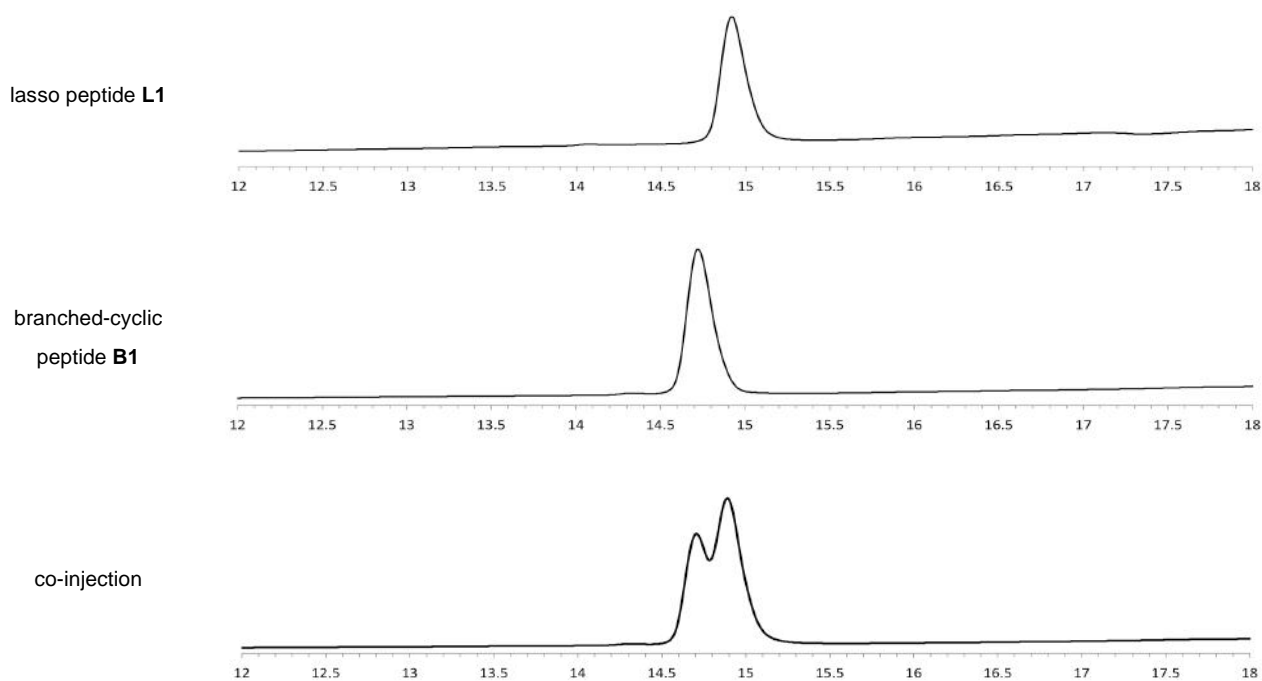

**Fig. S62.** Distinction between **L1** and **B1** by HPLC

## 11.2. Lasso peptide L2 vs Branched-cyclic peptide B2

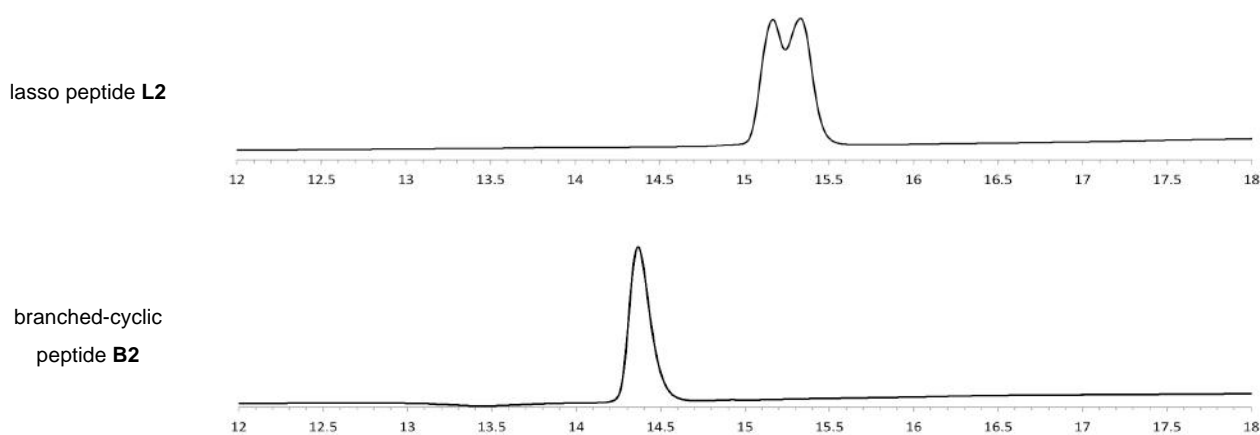

Fig. S63. Distinction between L2 and B2 by HPLC

## 11.3. Lasso peptide L3 vs Branched-cyclic peptide B3

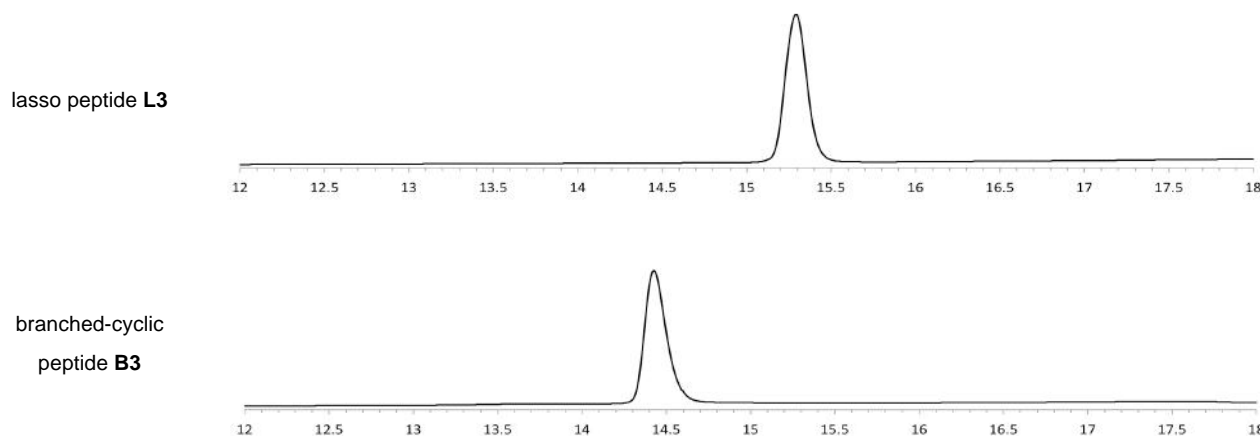

Fig. S64. Distinction between L3 and B3 by HPLC

## 12. Syntheses of lasso peptides with other peptide sequences

### 12.1. Peptide sequence from antibody Fc-region binder

#### 12.1.1. Synthesis of lasso peptide 10

##### Peptide $\alpha$ -ketoacid S35

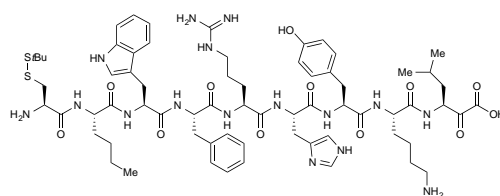

S35

Peptide  $\alpha$ -ketoacid **S35** was prepared using the protected leucine  $\alpha$ -ketoacid resin **S1** on a 0.24 mmol scale (1.4 g) with a substitution capacity of 0.17 mmol/g. After the full assembly of amino acids, the resin was treated with (95:2.5:2.5) TFA:DODT:H<sub>2</sub>O for 1.5 h and removed by filtration. The volatiles were evaporated from the filtrate under reduced pressure. The residue was triturated

with MTBE and centrifuged to obtain the crude **S35**. Purification of crude **S35** was performed by preparative HPLC using YMC C18 column (20 x 250 mm) with a gradient of 20 to 95% CH<sub>3</sub>CN with 0.1% TFA in 28 min. The pure product fractions were pooled and lyophilized to obtain 32 mg of **S35** (10% yield for peptide synthesis, resin cleavage and purification steps). Analytical HPLC and HRMS were used to confirm the purity and exact mass of the product.

**HRMS** (MALDI) calcd for C<sub>67</sub>H<sub>97</sub>N<sub>16</sub>O<sub>12</sub>S<sub>2</sub> [M+H]<sup>+</sup>: 1381.6908, found: 1381.6892.

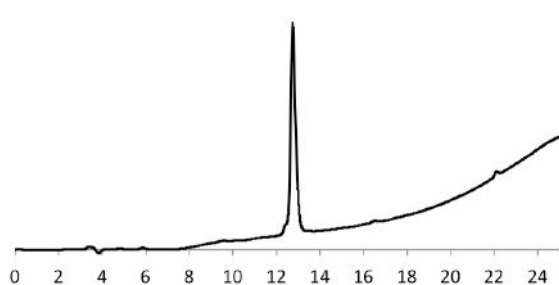

**Fig. S65.** Analytical HPLC of purified **S35**

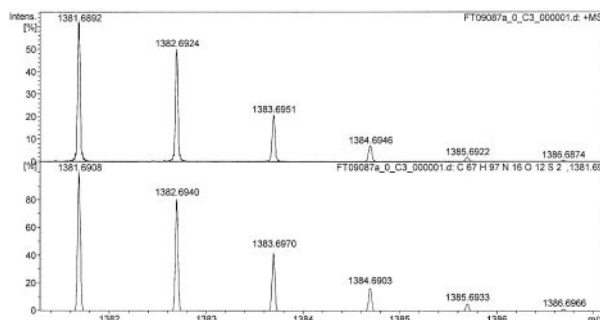

**Fig. S66.** HRMS (MALDI) of measured (top) and calculated (bottom) isotopic pattern of **S35**

### Peptido[2]rotaxane **S36**

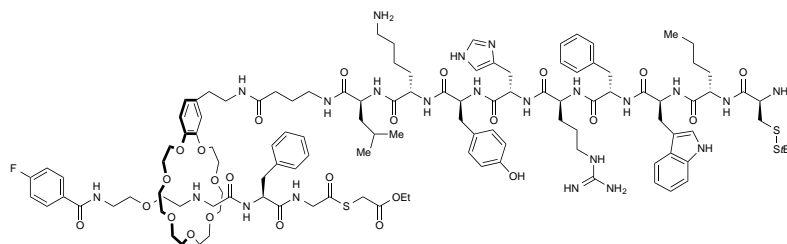

**S36**

To a solution of rotaxane **4** (13 mg, 9.2 μmol, 1.0 equiv) in DMSO (95 μL) was added Et<sub>2</sub>NH (5 μL), and the mixture was incubated at RT for 4 min and directly added to a solution of peptide α-ketoacid **S35** (17 mg, 12 μmol, 1.3 equiv) in DMSO/H<sub>2</sub>O (6:4, 268 μL, 0.1 M oxalic acid). The resulting mixture was incubated at 60 °C for 17 h and cooled to RT. Purification was performed by preparative HPLC using YMC C18 column (20 x 250 mm) with a gradient of 20 to 95% CH<sub>3</sub>CN with 0.1% TFA in 28 min. The pure product fractions were pooled and lyophilized to obtain 4.8 mg of **S36** (22% yield for deprotection and KAHA ligation steps). Analytical HPLC and HRMS were used to confirm the purity and exact mass of the product.

**HRMS** (MALDI) calcd for C<sub>118</sub>H<sub>170</sub>N<sub>22</sub>O<sub>25</sub>S<sub>3</sub> [M+H]<sup>+</sup>: 2410.1848, found: 2410.1897.

t = 16 h

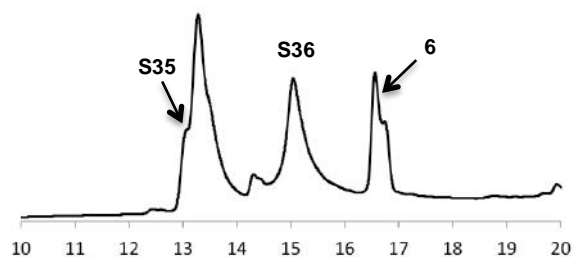Fig. S67. HPLC monitoring of the KAHA ligation to form **S36**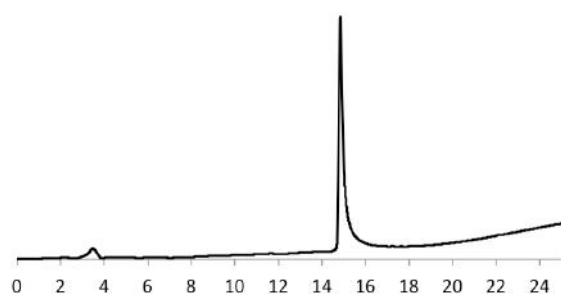Fig. S68. Analytical HPLC of purified **S36**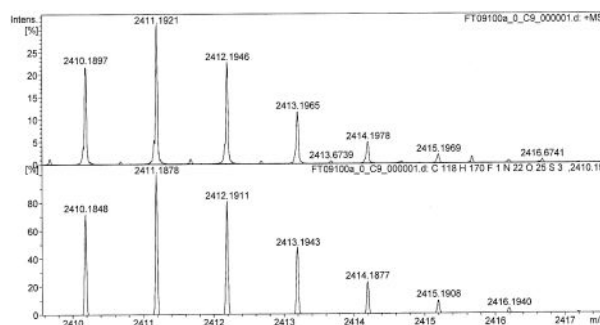Fig. S69. HRMS (MALDI) of measured (top) and calculated (bottom) isotopic pattern of **S36**

### Lasso peptide **S37**

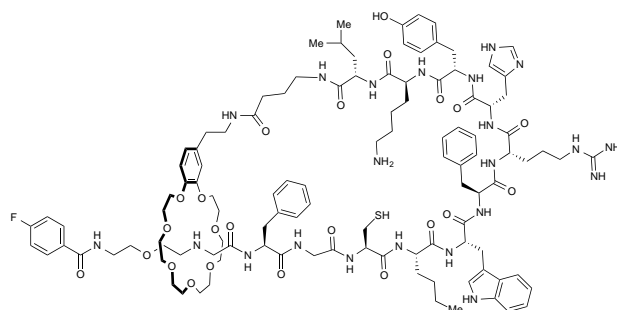**S37**

4-Mercaptophenylacetic acid (3.2 mg, 19  $\mu\text{mol}$ , 10 equiv) and TCEP-HCl (11 mg, 38  $\mu\text{mol}$ , 20 equiv) were dissolved in 0.25 M sodium phosphate buffer (pH 8.0)/CH<sub>3</sub>CN (1:1, 475  $\mu\text{L}$ ), and pH of this solution was adjusted to 7.3 by adding 1 M aq NaOH. A solution of **S36** (4.6 mg, 1.9  $\mu\text{mol}$ , 1.0 equiv) in 0.1 M sodium phosphate buffer (pH 7.4)/CH<sub>3</sub>CN (1:1, 200  $\mu\text{L}$ ) was prepared, and a portion (50  $\mu\text{L}$ ) of this solution was added to the ligation buffer. The mixture was incubated at RT for 20 min, and the next portion (50  $\mu\text{L}$ ) of the solution of **S36** was added to the mixture. This addition-incubation process was repeated every 5 minutes. After complete addition, the mixture was further incubated at RT for 40 min and purified by preparative HPLC using YMC C18 column (20 x 250 mm) with a gradient of 20 to 95% CH<sub>3</sub>CN with 0.1% TFA in 28 min. The pure product fractions were pooled and lyophilized to obtain 2.7 mg of **S37** (65% yield). Analytical HPLC and HRMS were used to confirm the purity and exact mass of the product.

**HRMS (MALDI)** calcd for  $C_{110}H_{153}FN_{22}NaO_{23}S [M+Na]^+$ : 2224.1076, found: 2224.1118.

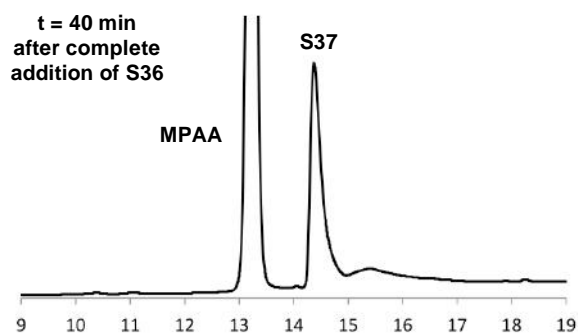

**Fig. S70.** HPLC monitoring of the NCL to form **S37**

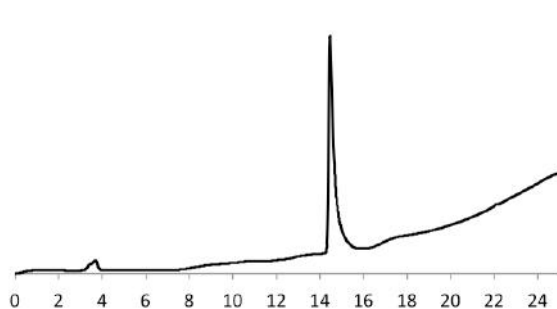

**Fig. S71.** Analytical HPLC of purified **S37**

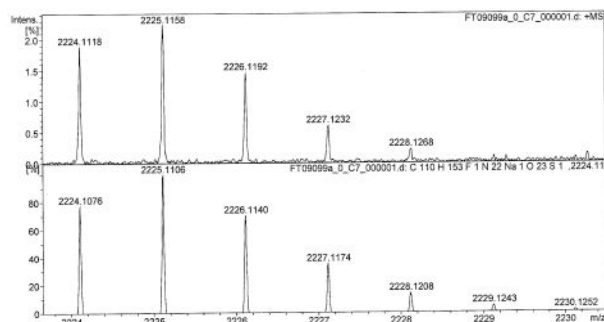

**Fig. S72.** HRMS (MALDI) of measured (top) and calculated (bottom) isotopic pattern of **S37**

### Cys-alkylated lasso peptide **10**

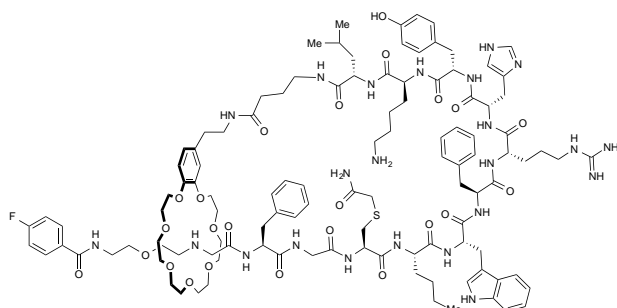

**10**

To a solution of **S37** (2.7 mg, 1.2  $\mu$ mol, 1.0 equiv) in 0.1 M sodium phosphate buffer (pH 7.4)/ $CH_3CN$  (1:1, 240  $\mu$ L) was added a solution of iodoacetamide (0.27 mg, 1.4  $\mu$ mol, 1.2 equiv) in  $CH_3CN$  (27  $\mu$ L). The mixture was incubated at RT for 40 min and purified by preparative HPLC using YMC C18 column (20 x 250 mm) with a gradient of 20 to 95%  $CH_3CN$  with 0.1% TFA in 28 min. The pure product fractions were pooled and lyophilized to obtain 1.0 mg of **10** (37% yield). Analytical HPLC and HRMS were used to confirm the purity and exact mass of the product.

**HRMS (MALDI)** calcd for  $C_{112}H_{157}FN_{23}O_{24}S [M+H]^+$ : 2259.1471, found: 2259.1504.

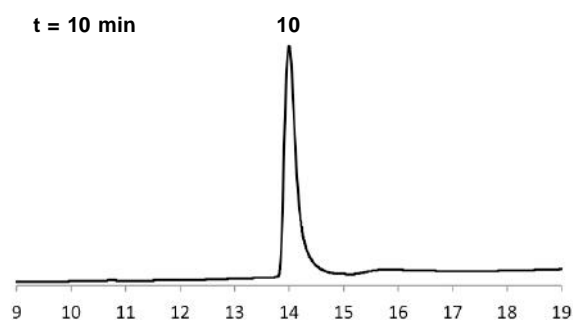

Fig. S73. HPLC monitoring of the cysteine alkylation to form **10**

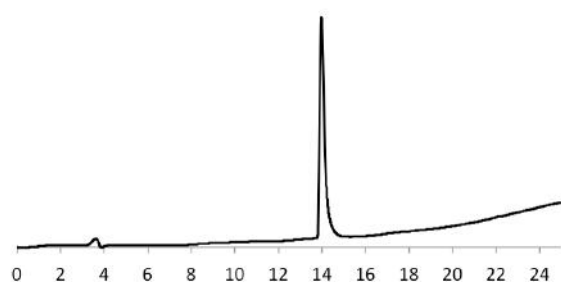

Fig. S74. Analytical HPLC of purified **10**

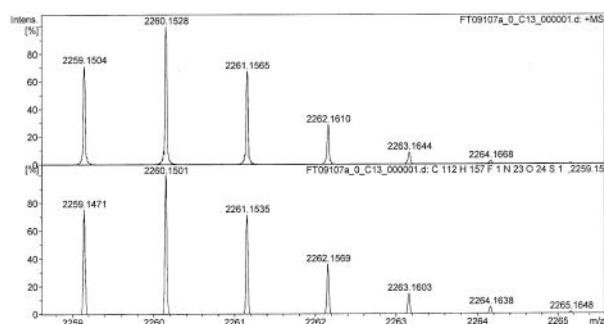

Fig. S75. HRMS (MALDI) of measured (top) and calculated (bottom) isotopic pattern of **10**

### 12.1.2. Trypsin digestion of **10**

In order to briefly confirm the formation of **10**, trypsin digestion of **10** was conducted. A solution of **10** in H<sub>2</sub>O (1  $\mu$ g/ $\mu$ L) and a solution of trypsin in H<sub>2</sub>O (1  $\mu$ g/ $\mu$ L) were prepared. A solution of 20  $\mu$ g of peptide was diluted with 50  $\mu$ L of a buffer (50 mM Tris-HCl, 1 mM CaCl<sub>2</sub>, pH 7.6). To this solution was added a solution of 1  $\mu$ g of trypsin. The mixture was incubated at RT for 4 h. The major degradation product was analyzed and identified as [2]rotaxane **S38** by HRMS (MALDI) analysis.

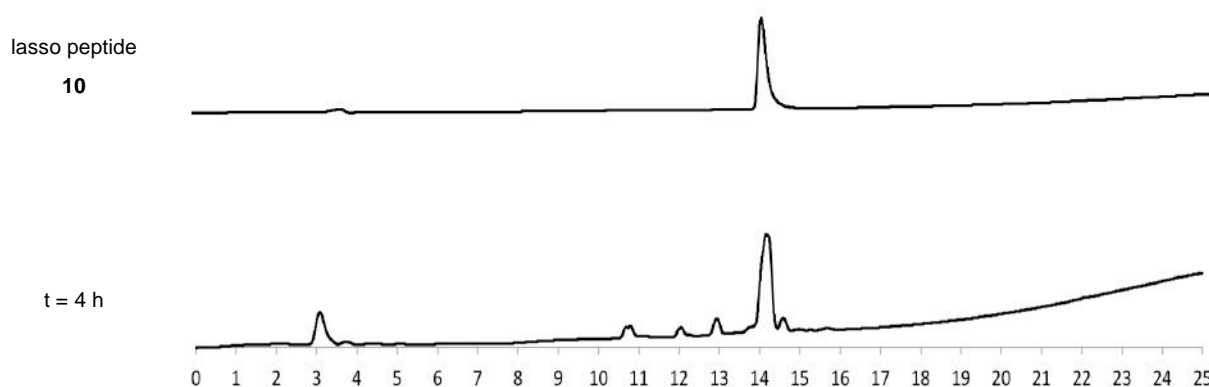

Fig. S76. Trypsin digestion of **10**

Degradation product **S38**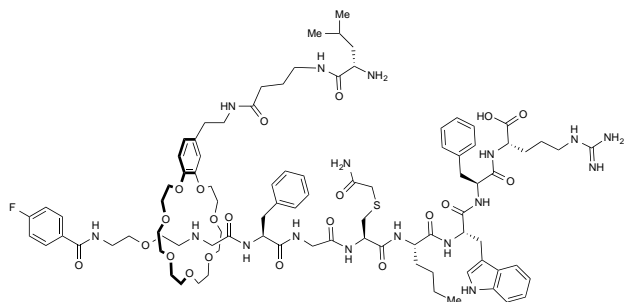

**HRMS (MALDI) calcd for C<sub>91</sub>H<sub>131</sub>FN<sub>17</sub>O<sub>21</sub>S [M+H]<sup>+</sup>: 1848.9405, found: 1848.9399.**

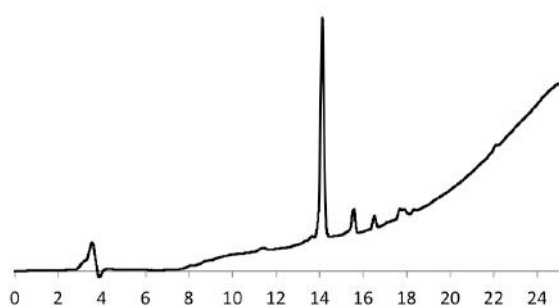

**Fig. S77.** Analytical HPLC of purified **S38**

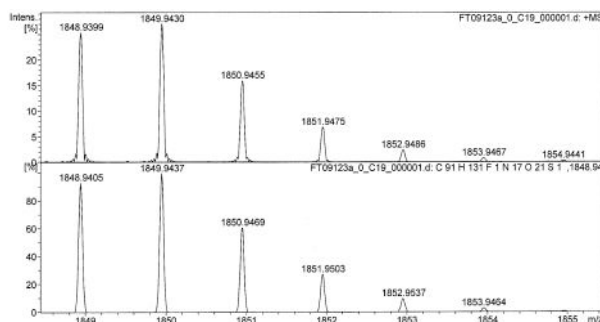

**Fig. S78.** HRMS (MALDI) of measured (top) and calculated (bottom) isotopic pattern of **S38**

## 12.2. Peptide sequence from lassomycin

### 12.2.1. Synthesis of lasso peptide 11

#### Peptide $\alpha$ -ketoacid **S39**

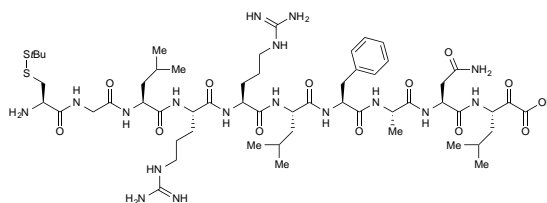

**S39**

Peptide  $\alpha$ -ketoacid **S39** was prepared using the protected leucine  $\alpha$ -ketoacid resin **S1** on a 0.10 mmol scale (0.49 g) with a substitution capacity of 0.20 mmol/g. After the full assembly of amino acids, the resin was treated with (95:2.5:2.5) TFA:DODT:H<sub>2</sub>O for 1.5 h and removed by filtration. The volatiles were evaporated from the filtrate under reduced pressure. The residue was triturated with Et<sub>2</sub>O and centrifuged to obtain the crude **S39**. Purification of crude **S39** was performed by preparative HPLC using YMC C18 column (20 x 250 mm) with a gradient of 20 to 95% CH<sub>3</sub>CN with 0.1% TFA in 28 min. The pure product fractions were pooled and lyophilized to obtain 45 mg of **S39** (36% yield for peptide synthesis, resin cleavage and purification steps). Analytical HPLC and HRMS were used to confirm the purity and exact mass of the product.

**HRMS (MALDI) calcd for C<sub>56</sub>H<sub>96</sub>N<sub>17</sub>O<sub>13</sub>S<sub>2</sub> [M+H]<sup>+</sup>: 1278.6809, found: 1278.6816.**

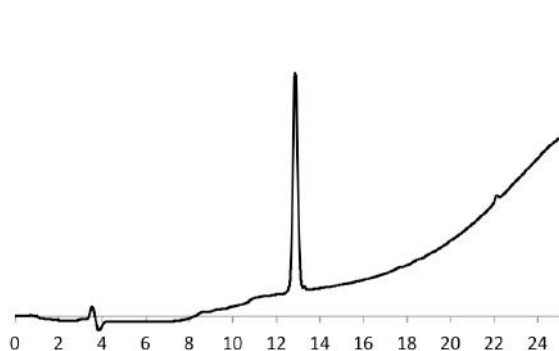Fig. S79. Analytical HPLC of purified **S39**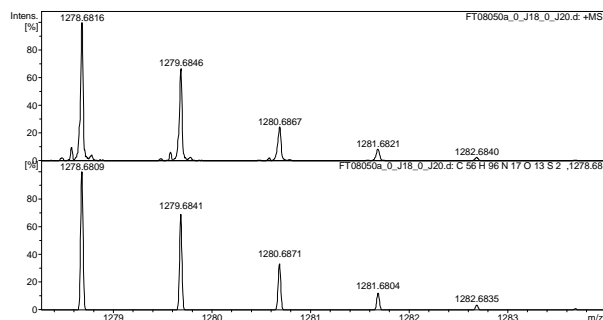Fig. S80. HRMS (MALDI) of measured (top) and calculated (bottom) isotopic pattern of **S39**

### Peptido[2]rotaxane **S40**

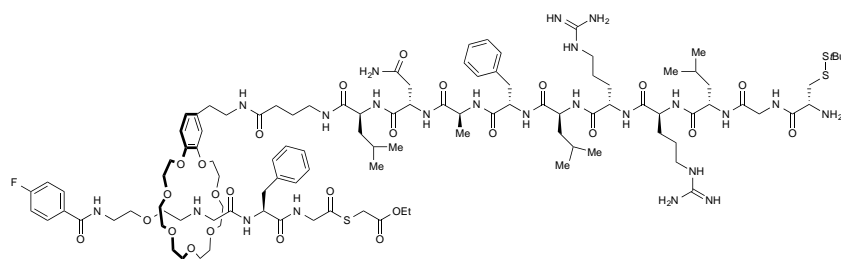**S40**

Hydroxylamine **6** (21 mg, 18  $\mu\text{mol}$ , 1.5 equiv) and  $\alpha$ -ketoacid **S39** (15 mg, 12  $\mu\text{mol}$ , 1.0 equiv) were dissolved in DMSO/H<sub>2</sub>O (6:4, 400  $\mu\text{L}$ , 0.1 M oxalic acid). The resulting mixture was incubated at 60 °C for 10 h and cooled to RT. Purification was performed by preparative HPLC using YMC C18 column (20 x 250 mm) with a gradient of 20 to 95% CH<sub>3</sub>CN with 0.1% TFA in 28 min. The pure product fractions were pooled and lyophilized to obtain 7.2 mg of **S40** (26% yield). Analytical HPLC and HRMS were used to confirm the purity and exact mass of the product.

**HRMS** (MALDI) calcd for C<sub>107</sub>H<sub>169</sub>FN<sub>23</sub>O<sub>26</sub>S<sub>3</sub> [M+H]<sup>+</sup>: 2307.1750, found: 2307.1749.

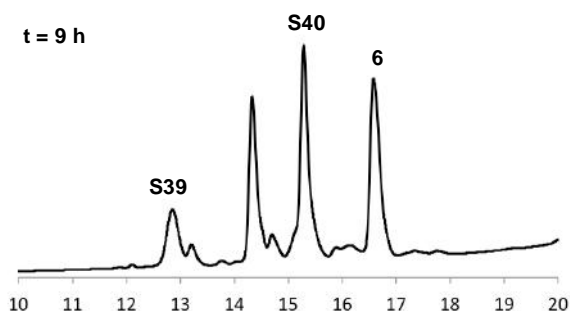Fig. S81. HPLC monitoring of the KAHA ligation to form **S40**



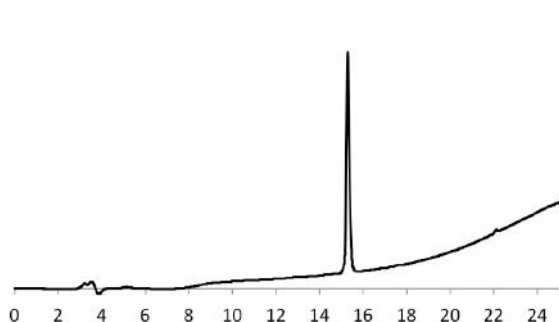

**Fig. S82.** Analytical HPLC of purified **S40**

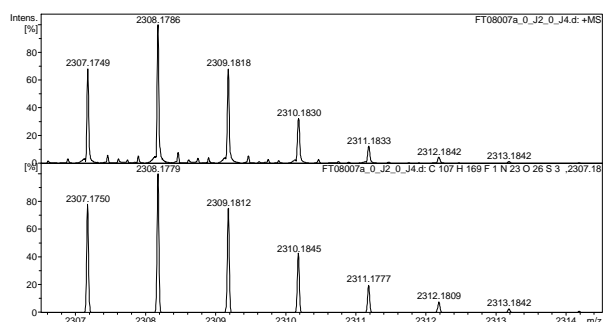

**Fig. S83.** HRMS (MALDI) of measured (top) and calculated (bottom) isotopic pattern of **S40**

### Lasso peptide **S41**

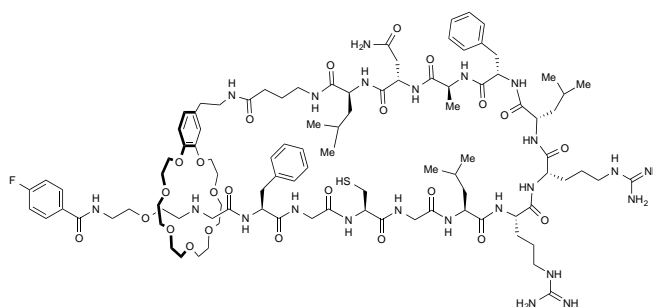

**S41**

4-Mercaptophenylacetic acid (3.5 mg, 21  $\mu\text{mol}$ , 10 equiv) and TCEP-HCl (12 mg, 42  $\mu\text{mol}$ , 20 equiv) were dissolved in 0.25 M sodium phosphate buffer (pH 8.0)/CH<sub>3</sub>CN (1:1, 600  $\mu\text{L}$ ), and pH of this solution was adjusted to 7.5 by adding 1 M aq NaOH. A solution of **S40** (4.8 mg, 2.1  $\mu\text{mol}$ , 1.0 equiv) in 0.1 M sodium phosphate buffer (pH 7.4)/CH<sub>3</sub>CN (1:1, 90  $\mu\text{L}$ ) was prepared, and a portion (30  $\mu\text{L}$ ) of this solution was added to the ligation buffer. The mixture was incubated at RT for 20 min, and the next portion (30  $\mu\text{L}$ ) of the solution of **S40** was added to the mixture. This addition-incubation process was repeated every 20 minutes. After complete addition, the mixture was further incubated at RT for 1 h and purified by preparative HPLC using YMC C18 column (20 x 250 mm) with a gradient of 20 to 95% CH<sub>3</sub>CN with 0.1% TFA in 28 min. The pure product fractions were pooled and lyophilized to obtain 1.5 mg of **S41** (34% yield). Analytical HPLC and HRMS were used to confirm the purity and exact mass of the product.

**HRMS** (MALDI) calcd for C<sub>99</sub>H<sub>153</sub>FN<sub>23</sub>O<sub>24</sub>S [M+H]<sup>+</sup>: 2099.1158, found: 2099.1167.

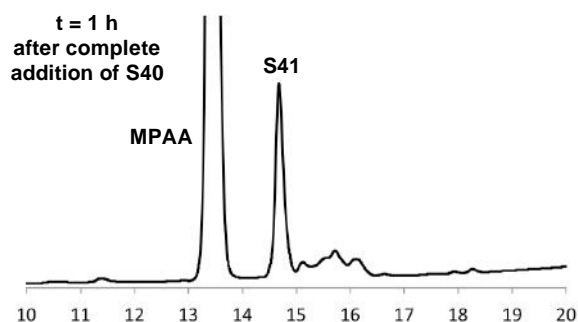

**Fig. S84.** HPLC monitoring of the NCL to form **S41**

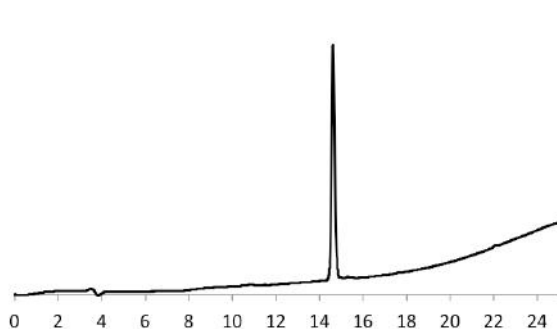

**Fig. S85.** Analytical HPLC of purified **S41**

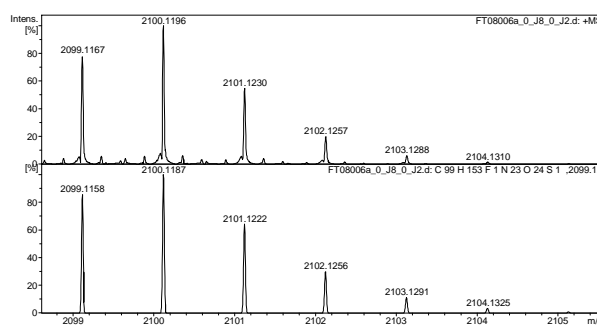

**Fig. S86.** HRMS (MALDI) of measured (top) and calculated (bottom) isotopic pattern of **S41**

### Cys-alkylated lasso peptide **11**

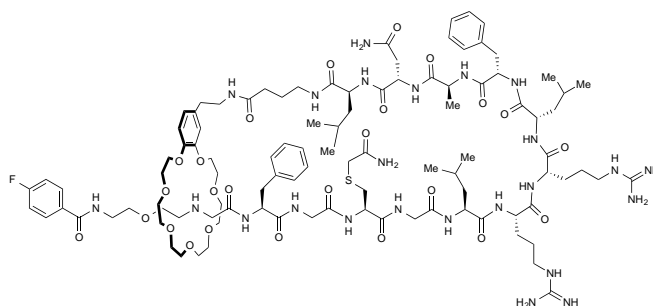

#### **11**

To a solution of **S41** (3.1 mg, 1.5  $\mu\text{mol}$ , 1.0 equiv) in 0.1 M sodium phosphate buffer (pH 7.4)/ $\text{CH}_3\text{CN}$  (1:1, 117  $\mu\text{L}$ ) was added a solution of iodoacetamide (0.33 mg, 1.8  $\mu\text{mol}$ , 1.2 equiv) in 0.1 M sodium phosphate buffer (pH 7.4)/ $\text{CH}_3\text{CN}$  (1:1, 33  $\mu\text{L}$ ). The mixture was incubated at RT for 50 min and purified by preparative HPLC using YMC C18 column (20 x 250 mm) with a gradient of 20 to 95%  $\text{CH}_3\text{CN}$  with 0.1% TFA in 28 min. The pure product fractions were pooled and lyophilized to obtain 1.7 mg of **11** (53% yield). Analytical HPLC and HRMS were used to confirm the purity and exact mass of the product.

**HRMS** (MALDI) calcd for  $\text{C}_{101}\text{H}_{156}\text{FN}_{24}\text{O}_{25}\text{S}$   $[\text{M}+\text{H}]^+$ : 2156.1373, found: 2156.1304.

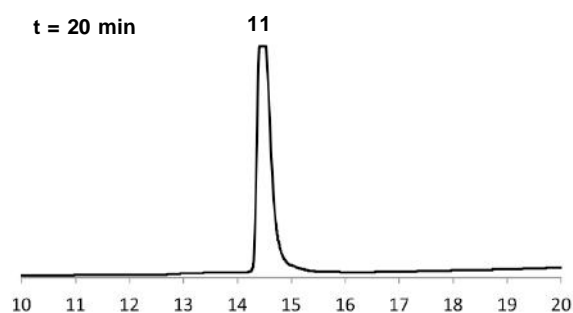

Fig. S87. HPLC monitoring of the cysteine alkylation to form **11**

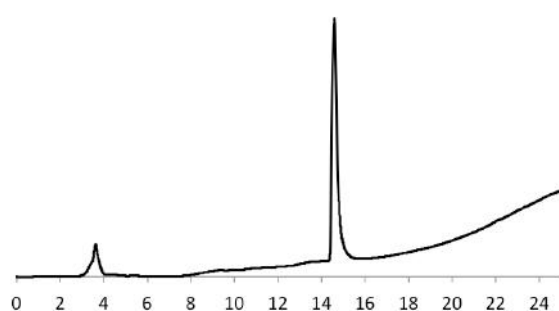

Fig. S88. Analytical HPLC of purified **11**

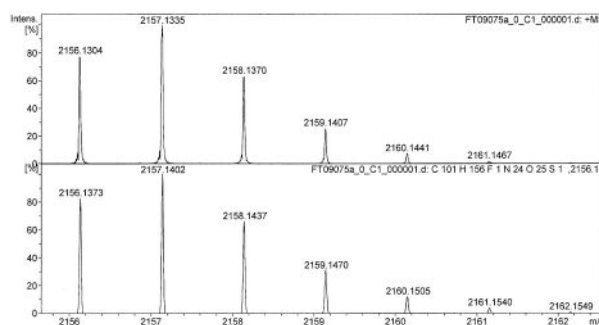

Fig. S89. HRMS (MALDI) of measured (top) and calculated (bottom) isotopic pattern of **11**

### 12.2.2. Trypsin digestion of **11**

In order to briefly confirm the formation of **11**, trypsin digestion of **11** was conducted. A solution of **11** in H<sub>2</sub>O (1 μg/μL) and a solution of trypsin in H<sub>2</sub>O (1 μg/μL) were prepared. A solution of 20 μg of peptide was diluted with 50 μL of a buffer (50 mM Tris-HCl, 1 mM CaCl<sub>2</sub>, pH 7.6). To this solution was added a solution of 1 μg of trypsin. The mixture was incubated at RT for 4 h. The major degradation product was analyzed and identified as [2]rotaxane **S42** by HRMS (MALDI) analysis.

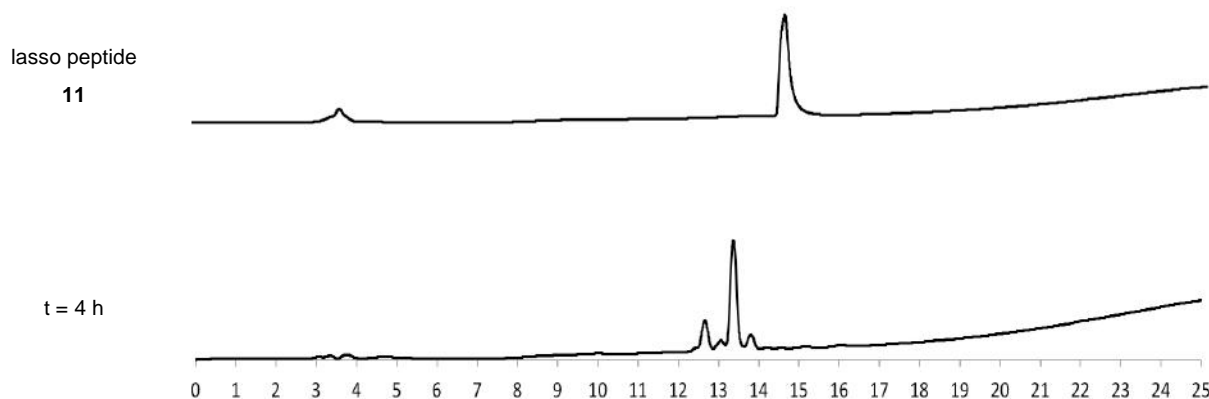

Fig. S90. Trypsin digestion of **11**

Degradation product **S42**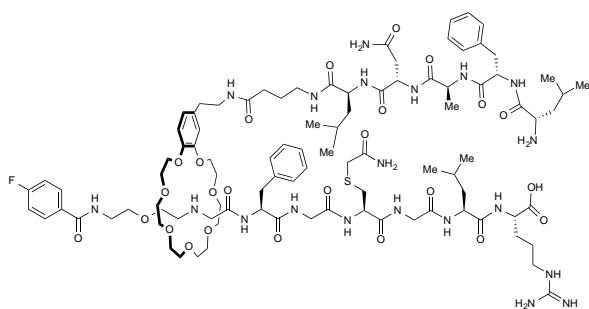

**HRMS (MALDI) calcd for C<sub>95</sub>H<sub>146</sub>FN<sub>20</sub>O<sub>25</sub>S [M+H]<sup>+</sup>: 2018.0467, found: 2018.0472.**

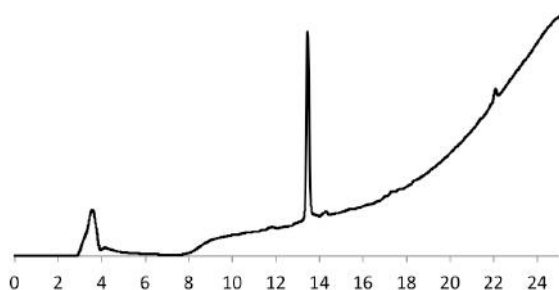

**Fig. S91.** Analytical HPLC of purified **S42**

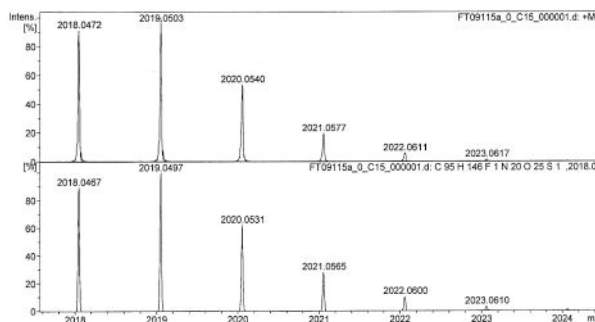

**Fig. S92.** HRMS (MALDI) of measured (top) and calculated (bottom) isotopic pattern of **S42**

## 12.3. Peptide sequence from somatostatin

### 12.3.1. Synthesis of lasso peptide 12

#### Peptide $\alpha$ -ketoacid **S43**

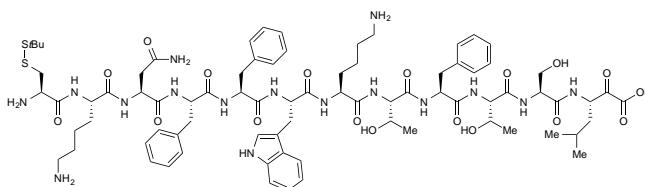

**S43**

Peptide  $\alpha$ -ketoacid **S43** was prepared using the protected leucine  $\alpha$ -ketoacid resin **S1** on a 0.10 mmol scale (0.50 g) with a substitution capacity of 0.20 mmol/g. After the full assembly of amino acids, the resin was treated with (95:2.5:2.5) TFA:DODT:H<sub>2</sub>O for 1.5 h and removed by filtration. The volatiles were evaporated from the filtrate under reduced pressure. The residue was triturated with Et<sub>2</sub>O and centrifuged to obtain the crude **S43**. Purification of crude **S43** was performed by preparative HPLC using YMC C18 column (20 x 250 mm) with a gradient of 20 to 95% CH<sub>3</sub>CN with 0.1% TFA in 28 min. The pure product fractions were pooled and lyophilized to obtain 43 mg of **S43** (26% yield for peptide synthesis, resin cleavage and purification steps). Analytical HPLC and HRMS were used to confirm the purity and exact mass of the product.

**HRMS (MALDI) calcd for C<sub>79</sub>H<sub>113</sub>N<sub>16</sub>O<sub>18</sub>S<sub>2</sub> [M+H]<sup>+</sup>: 1637.7855, found: 1637.7863.**

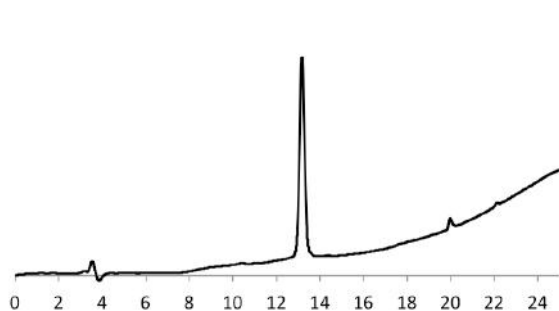Fig. S93. Analytical HPLC of purified **S43**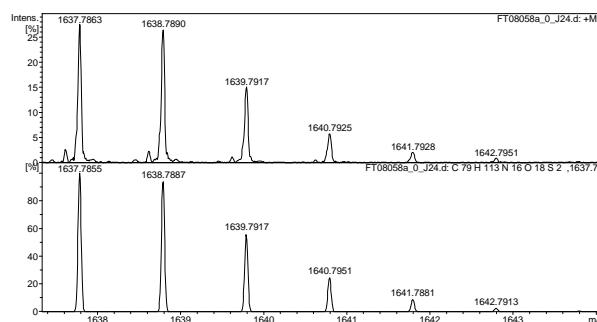Fig. S94. HRMS (MALDI) of measured (top) and calculated (bottom) isotopic pattern of **S43**

### Peptido[2]rotaxane **S44**

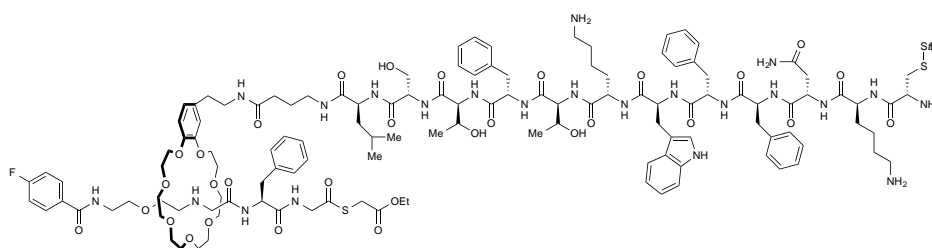**S44**

Hydroxylamine **6** (11 mg, 9.3  $\mu\text{mol}$ , 1.0 equiv) and  $\alpha$ -ketoacid **S43** (23 mg, 14  $\mu\text{mol}$ , 1.5 equiv) were dissolved in DMSO/H<sub>2</sub>O (6:4, 465  $\mu\text{L}$ , 0.1 M oxalic acid). The resulting mixture was incubated at 60 °C for 23 h and cooled to RT. Purification was performed by preparative HPLC using YMC C18 column (20 x 250 mm) with a gradient of 20 to 95% CH<sub>3</sub>CN with 0.1% TFA in 28 min. The pure product fractions were pooled and lyophilized to obtain 7.3 mg of **S44** (29% yield). Analytical HPLC and HRMS were used to confirm the purity and exact mass of the product.

**HRMS** (MALDI) calcd for C<sub>130</sub>H<sub>186</sub>FN<sub>22</sub>O<sub>31</sub>S<sub>3</sub> [M+H]<sup>+</sup>: 2666.2795, found: 2666.2788.

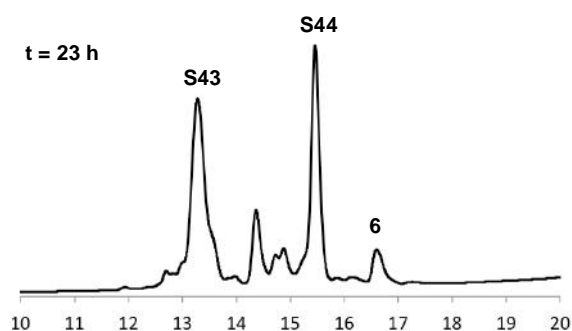Fig. S95. HPLC monitoring of the KAHA ligation to form **S44**

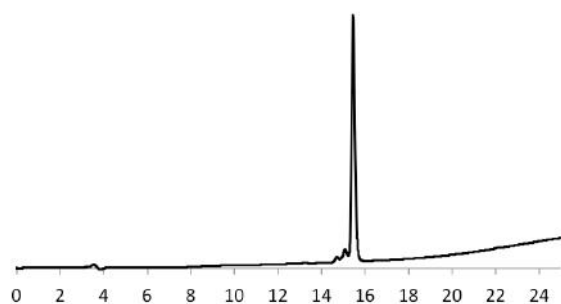

**Fig. S96.** Analytical HPLC of purified **S44**

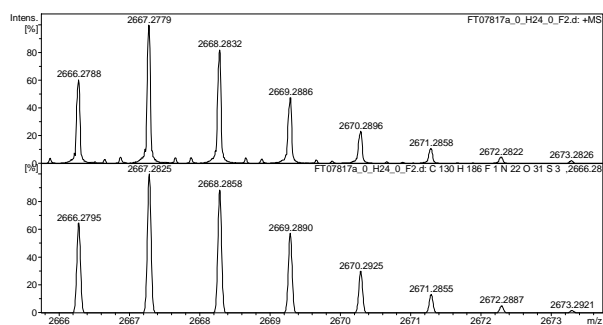

**Fig. S97.** HRMS (MALDI) of measured (top) and calculated (bottom) isotopic pattern of **S44**

## Lasso peptide **S45**

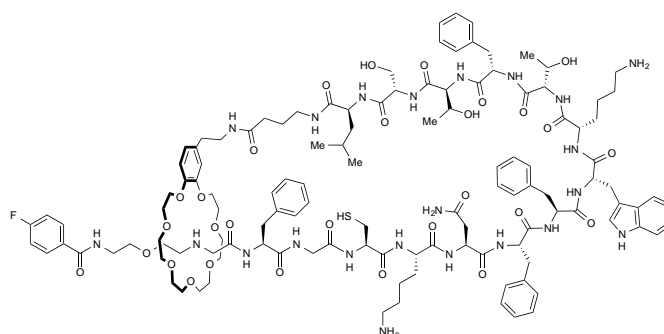

**S45**

4-Mercaptophenylacetic acid (6.6 mg, 38  $\mu\text{mol}$ , 20 equiv) and TCEP-HCl (11 mg, 38  $\mu\text{mol}$ , 20 equiv) were dissolved in 0.25 M sodium phosphate buffer (pH 8.0)/CH<sub>3</sub>CN (1:1, 1.0 mL), and pH of this solution was adjusted to 7.8 by adding 1 M aq NaOH. A solution of **S44** (5.2 mg, 1.9  $\mu\text{mol}$ , 1.0 equiv) in 0.1 M sodium phosphate buffer (pH 7.4)/CH<sub>3</sub>CN (1:1, 0.20 mL) was prepared, and a portion (50  $\mu\text{L}$ ) of this solution was added to the ligation buffer. The mixture was incubated at 40  $^{\circ}\text{C}$  for 10 min, and the next portion (50  $\mu\text{L}$ ) of the solution of **S44** was added to the mixture. This addition-incubation process was repeated every 10 minutes. After complete addition, the mixture was further incubated at 40  $^{\circ}\text{C}$  for 1.5 h and purified by preparative HPLC using YMC C18 column (20 x 250 mm) with a gradient of 20 to 95% CH<sub>3</sub>CN with 0.1% TFA in 28 min. The pure product fractions were pooled and lyophilized to obtain 2.2 mg of **S45** (47% yield). Analytical HPLC and HRMS were used to confirm the purity and exact mass of the product.

**HRMS** (MALDI) calcd for C<sub>122</sub>H<sub>169</sub>FN<sub>22</sub>NaO<sub>29</sub>S [M+Na]<sup>+</sup>: 2480.2023, found: 2480.2052.

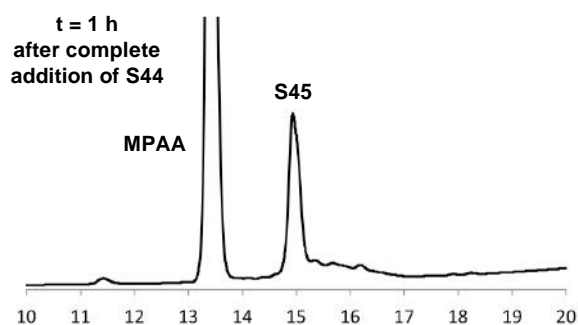

**Fig. S98.** HPLC monitoring of the NCL to form **S45**

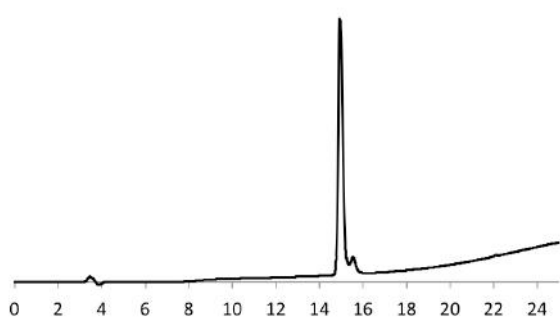

**Fig. S99.** Analytical HPLC of purified **S45**

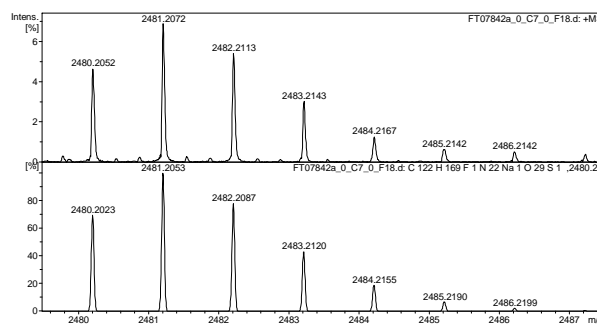

**Fig. S100.** HRMS (MALDI) of measured (top) and calculated (bottom) isotopic pattern of **S45**

## Cys-alkylated lasso peptide **12**

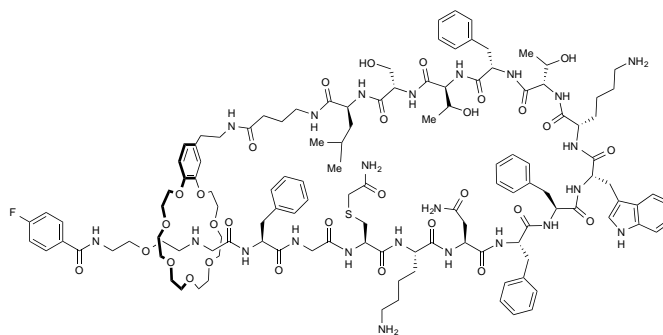

**12**

To a solution of **S45** (1.4 mg, 0.57  $\mu\text{mol}$ , 1.0 equiv) in 0.1 M sodium phosphate buffer (pH 7.4)/ $\text{CH}_3\text{CN}$  (1:1, 277  $\mu\text{L}$ ) was added a solution of iodoacetamide (0.13 mg, 0.68  $\mu\text{mol}$ , 1.2 equiv) in 0.1 M sodium phosphate buffer (pH 7.4)/ $\text{CH}_3\text{CN}$  (1:1, 13  $\mu\text{L}$ ). The mixture was incubated at RT for 20 min and purified by preparative HPLC using YMC C18 column (20 x 250 mm) with a gradient of 20 to 95%  $\text{CH}_3\text{CN}$  with 0.1% TFA in 28 min. The pure product fractions were pooled and lyophilized to obtain 0.9 mg of **12** (63% yield). Analytical HPLC and HRMS were used to confirm the purity and exact mass of the product.

**HRMS** (MALDI) calcd for  $\text{C}_{124}\text{H}_{173}\text{FN}_{23}\text{O}_{30}\text{S}$   $[\text{M}+\text{H}]^+$ : 2515.2418, found: 2515.2424.

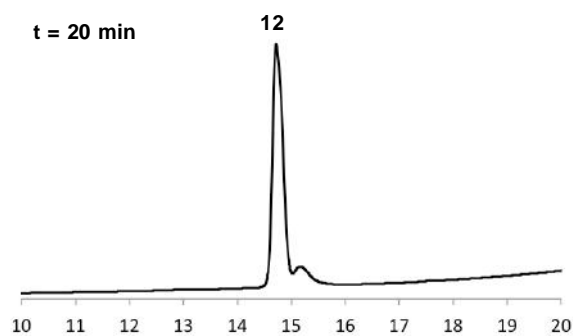

**Fig. S101.** HPLC monitoring of the cysteine alkylation to form **12**

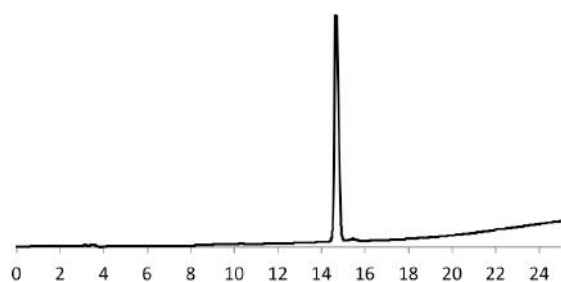

**Fig. S102.** Analytical HPLC of purified **12**

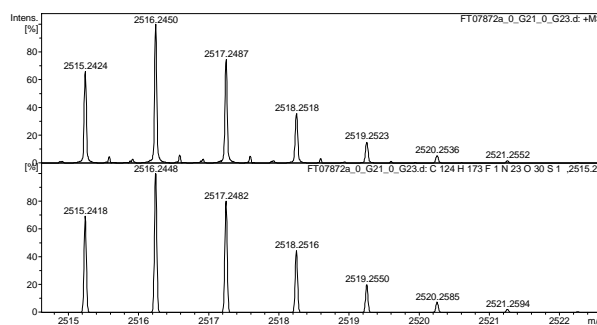

**Fig. S103.** HRMS (MALDI) of measured (top) and calculated (bottom) isotopic pattern of **12**

### 12.3.2. Trypsin digestion of **12**

In order to briefly confirm the formation of **12**, trypsin digestion of **12** was conducted. A solution of **12** in H<sub>2</sub>O (1 μg/μL) and a solution of trypsin in H<sub>2</sub>O (1 μg/μL) were prepared. A solution of 20 μg of peptide was diluted with 50 μL of a buffer (50 mM Tris-HCl, 1 mM CaCl<sub>2</sub>, pH 7.6). To this solution was added a solution of 1 μg of trypsin. The mixture was incubated at RT for 4 h. The starting peptide was degraded to two products, and these were identified as linear peptide **S46** and [2]rotaxane **S47** by HRMS (MALDI) analysis. This result strongly supported the formation of **12**.

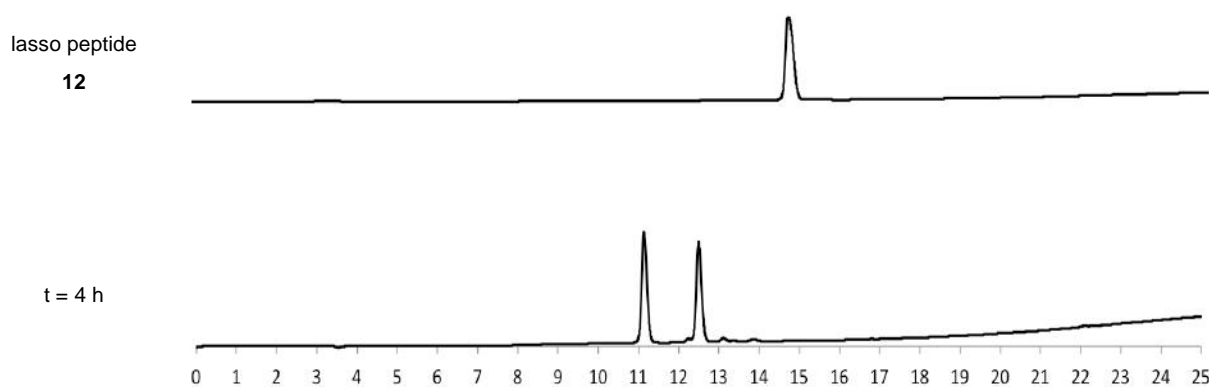

**Fig. S104.** Trypsin digestion of **12**



Degradation product **S46**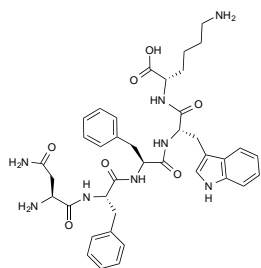

HRMS (MALDI) calcd for  $C_{39}H_{49}N_8O_7$   $[M+H]^+$ : 741.3719, found: 741.3718.

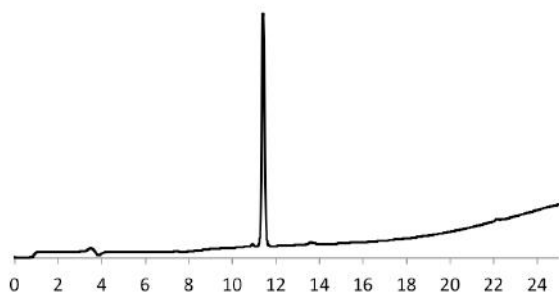

Fig. S105. Analytical HPLC of purified **S46**

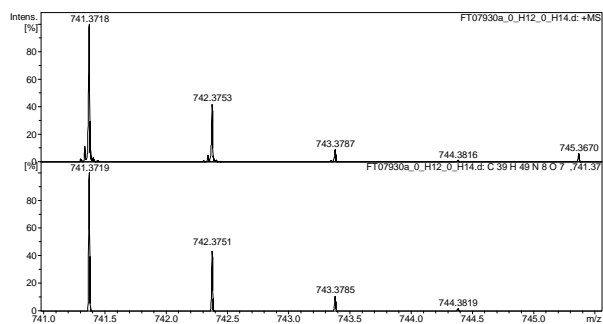

Fig. S106. HRMS (MALDI) of measured (top) and calculated (bottom) isotopic pattern of **S46**

Degradation product **S47**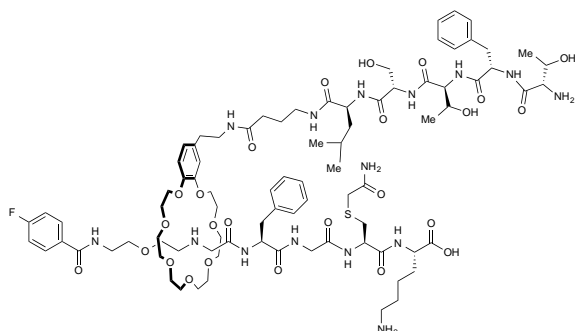

HRMS (MALDI) calcd for  $C_{85}H_{129}FN_{15}O_{25}S$   $[M+H]^+$ : 1810.8983, found: 1810.8970.

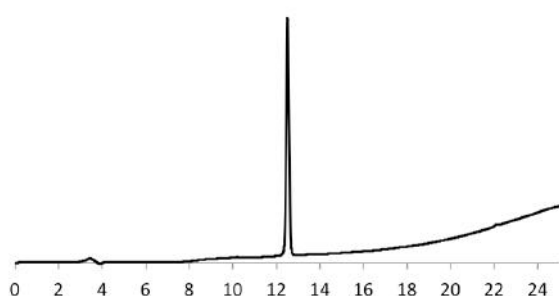

Fig. S107. Analytical HPLC of purified **S47**

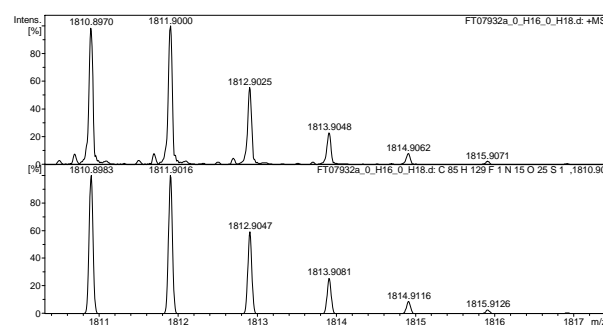

Fig. S108. HRMS (MALDI) of measured (top) and calculated (bottom) isotopic pattern of **S47**

### 13. Synthesis of cyclic peptide C1

#### 13.1. Bifunctional linear peptide S48

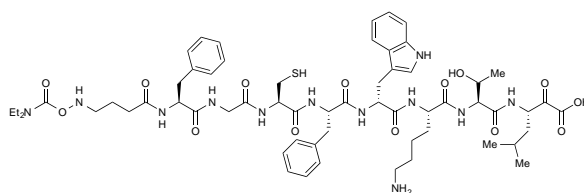

**S48**

Bifunctional linear peptide **S48** was prepared using the protected leucine  $\alpha$ -ketoacid resin **S1** on a 0.22 mmol scale (1.2 g) with a substitution capacity of 0.18 mmol/g. In addition to Fmoc amino acids listed in 1.4., *N*-Boc hydroxylamine **S13** was used for this peptide synthesis. The resin was treated with (95:2.5:2.5) TFA:DODT:H<sub>2</sub>O for 1 h and removed by filtration. The volatiles were evaporated from the filtrate under reduced pressure. The residue was triturated with Et<sub>2</sub>O and centrifuged to obtain the crude **S48**. Purification of crude **S48** was performed by preparative HPLC using YMC C18 column (20 x 250 mm) with a gradient of 20 to 95% CH<sub>3</sub>CN with 0.1% TFA in 28 min. The pure product fractions were pooled and lyophilized to obtain 20.9 mg of **S48** (8% yield for peptide synthesis, resin cleavage and purification steps). Analytical HPLC and HRMS were used to confirm the purity and exact mass of the product.

**HRMS** (MALDI) calcd for C<sub>60</sub>H<sub>85</sub>N<sub>12</sub>O<sub>14</sub>S [M+H]<sup>+</sup>: 1229.6023, found: 1229.6019.

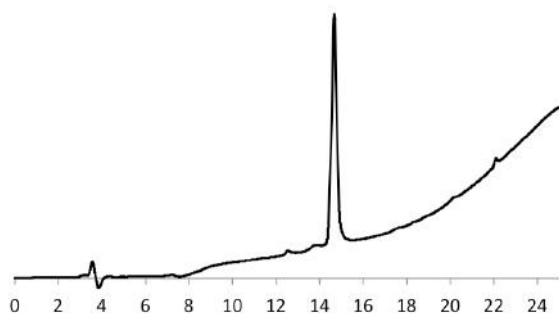

**Fig. S109.** Analytical HPLC of purified **S48**

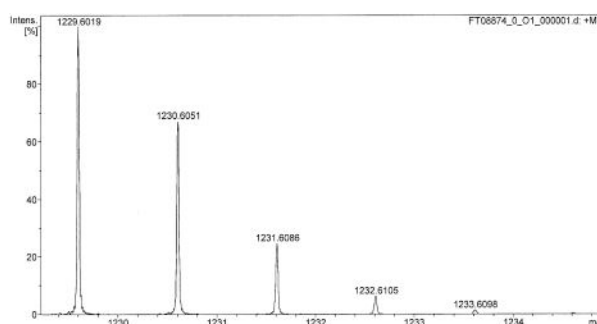

**Fig. S110.** HRMS (MALDI) of measured (top) and calculated (bottom) isotopic pattern of **S48**

#### 13.2. Cyclic peptide S49

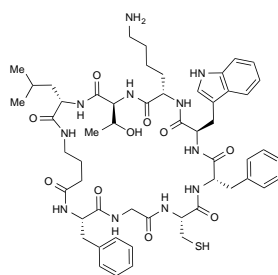

**S49**

Bifunctional linear peptide **S48** (12 mg, 9.9  $\mu$ mol) was dissolved in CH<sub>3</sub>CN/H<sub>2</sub>O (2:1, 3.3 mL, 0.1 M oxalic acid). The mixture was incubated at 70 °C for 7 h and cooled to RT. Purification was

performed by preparative HPLC using YMC C18 column (20 x 250 mm) with a gradient of 20 to 95% CH<sub>3</sub>CN with 0.1% TFA in 28 min. The pure product fractions were pooled and lyophilized to obtain 4.4 mg of **S49** (42% yield). Analytical HPLC and HRMS were used to confirm the purity and exact mass of the product.

**HRMS** (MALDI) calcd for C<sub>54</sub>H<sub>74</sub>N<sub>11</sub>O<sub>10</sub>S [M+H]<sup>+</sup>: 1068.5335, found: 1068.5332.

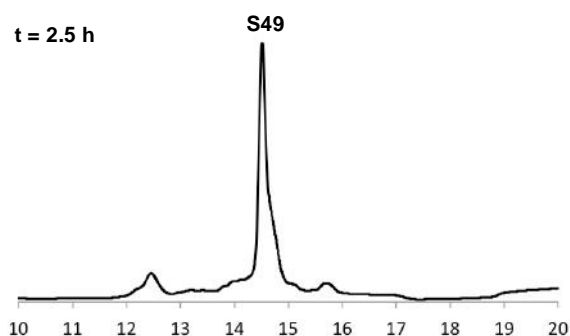

**Fig. S111.** HPLC monitoring of the KAHA cyclization to form **S49**

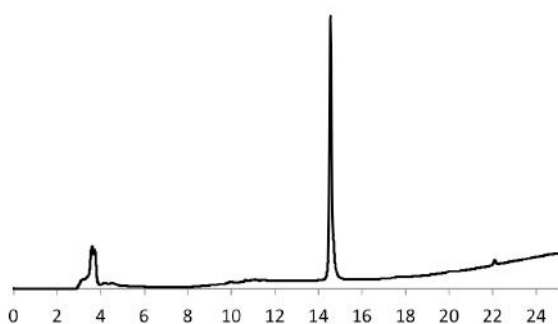

**Fig. S112.** Analytical HPLC of purified **S49**

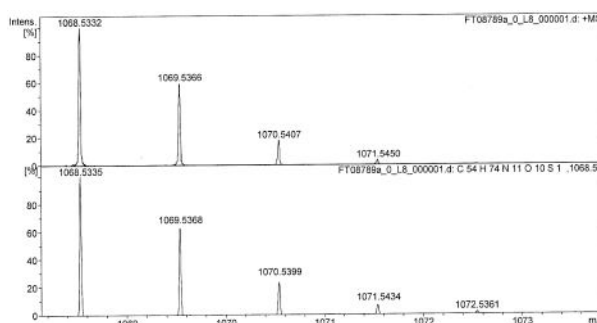

**Fig. S113.** HRMS (MALDI) of measured (top) and calculated (bottom) isotopic pattern of **S49**

### 13.3. Cyclic peptide **C1**

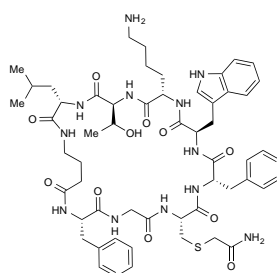

**C1**

To a solution of **S49** (4.4 mg, 4.1 μmol, 1.0 equiv) in 0.1 M sodium phosphate buffer (pH 7.4)/CH<sub>3</sub>CN (1:1, 319 μL) was added a solution of iodoacetamide (0.91 mg, 4.9 μmol, 1.2 equiv) in CH<sub>3</sub>CN (91 μL). The mixture was incubated at 37 °C for 2 h. Purification was performed by preparative HPLC using YMC C18 column (20 x 250 mm) with a gradient of 20 to 95% CH<sub>3</sub>CN with 0.1% TFA in 28 min. The pure product fractions were pooled and lyophilized to obtain 1.5 mg of **C1** (33% yield). Analytical HPLC and HRMS were used to confirm the purity and exact mass of the product.

HRMS (MALDI) calcd for  $C_{56}H_{77}N_{12}O_{11}S$   $[M+H]^+$ : 1125.5550, found: 1125.5547.

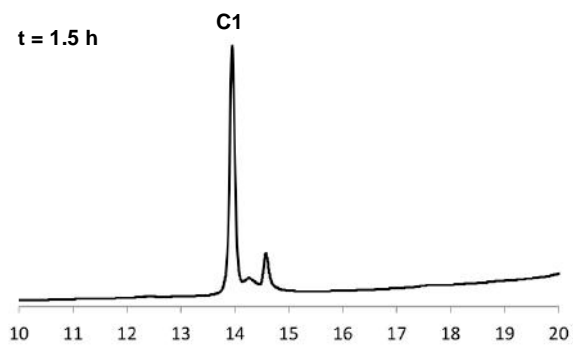

Fig. S114. HPLC monitoring of the cysteine alkylation to form C1

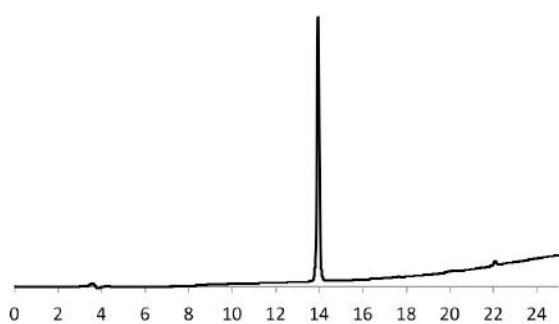

Fig. S115. Analytical HPLC of purified C1

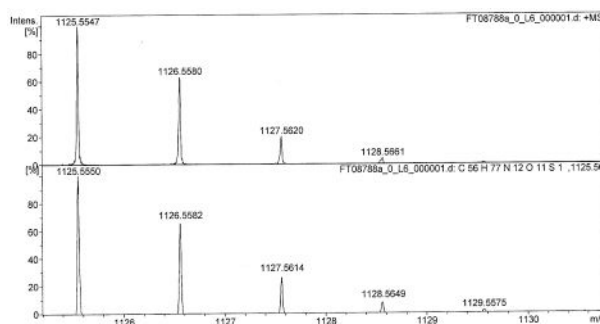

Fig. S116. HRMS (MALDI) of measured (top) and calculated (bottom) isotopic pattern of C1

*Investigation of the properties of the lasso peptides*

**Note:** Lyophilized peptides were dissolved in DMSO to make 10 mM stock solutions. The following stability assays were conducted by taking an aliquot from these stock solutions.

**14. Thermal stability assay**

A solution of 0.1 mg of lasso peptide was diluted with H<sub>2</sub>O (10% (v/v) final concentration of DMSO) and incubated at 95 °C for 8 h. Samples were cooled to RT and analyzed by analytical RP-HPLC.

**14.1. Lasso peptide L1**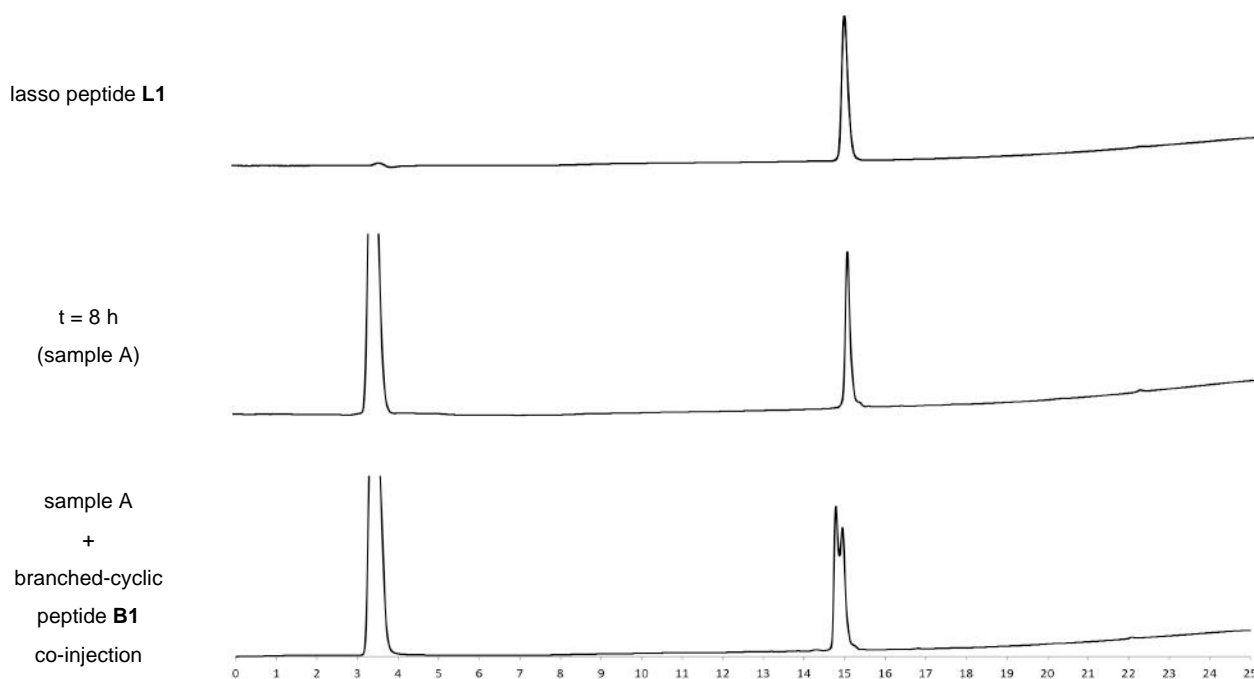

**Fig. S117.** Thermal stability assay of L1

**14.2. Lasso peptide L2**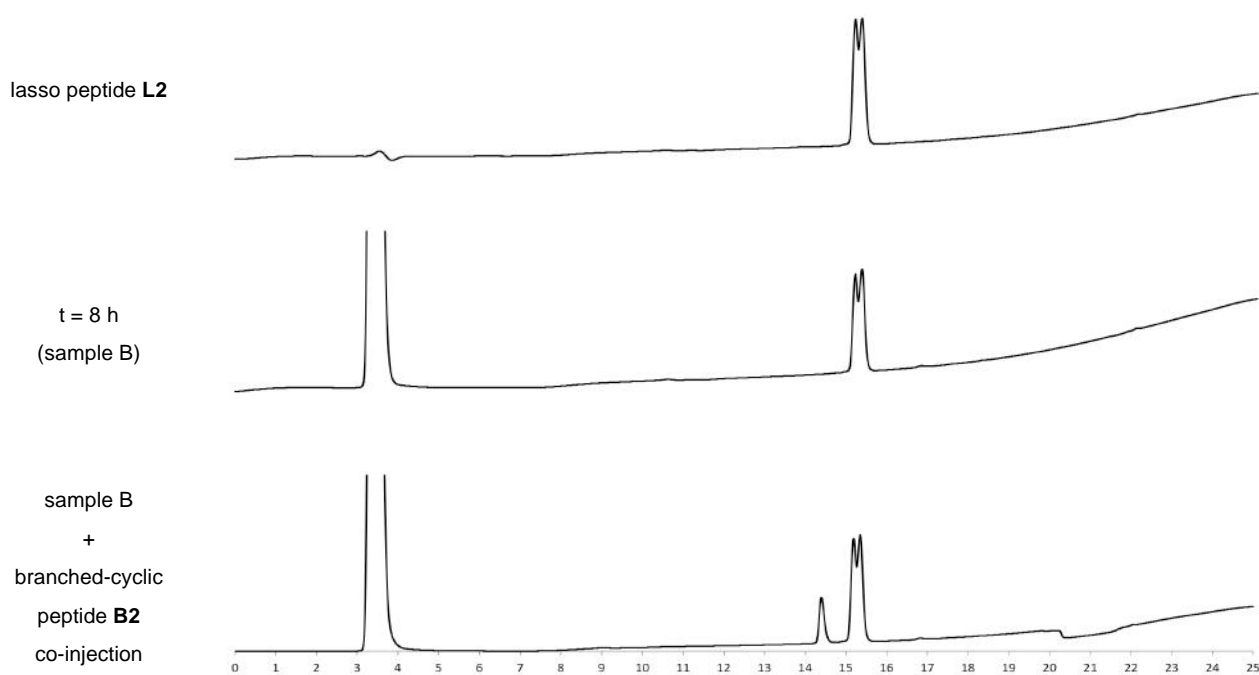**Fig. S118.** Thermal stability assay of L2**14.3. Lasso peptide L3**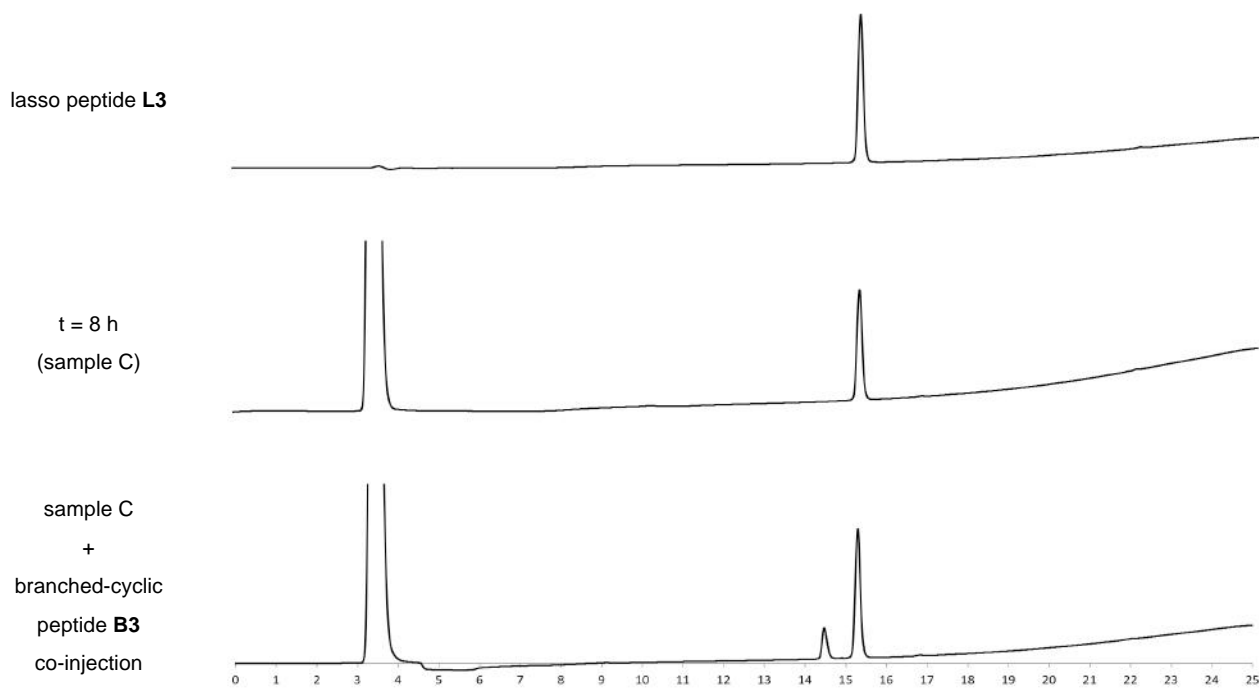**Fig. S119.** Thermal stability assay of L3

## 15. Chymotrypsin assay

A solution of 20  $\mu\text{g}$  of peptide was diluted with 51  $\mu\text{L}$  of a buffer (100 mM Tris-HCl, 10 mM  $\text{CaCl}_2$ , pH 8.2). An aliquot (10  $\mu\text{L}$ ) was taken from this solution, diluted with  $\text{H}_2\text{O}/\text{CH}_3\text{CN}$  (1:1, 10  $\mu\text{L}$ , 0.1% TFA) and injected to analytical RP-HPLC. The peak area of the peptide ( $A_0$ ) was determined by integration.

A solution of 20  $\mu\text{g}$  of peptide was diluted with 50  $\mu\text{L}$  of a buffer (100 mM Tris-HCl, 10 mM  $\text{CaCl}_2$ , pH 8.2). To this solution was added chymotrypsin dissolved in the same buffer (1.0  $\mu\text{g}/\mu\text{L}$ , 1.0  $\mu\text{L}$ ). The mixture was incubated at RT for 24 h and analyzed at selected time points: 2, 4, and 24 h for lasso peptides; 2 and 4 h for branched-cyclic peptides; 2, 4, and 12 h for cyclic peptide. For analysis, an aliquot (10  $\mu\text{L}$ ) was taken from the reaction mixture, diluted with  $\text{H}_2\text{O}/\text{CH}_3\text{CN}$  (1:1, 10  $\mu\text{L}$ , 0.1% TFA) and injected to analytical RP-HPLC. The peak area of the starting peptide ( $A_t$ ) was determined by integration. Percentage of the remaining peptide at each time point was calculated as follows:

$$\text{Peptide remaining (\%)} = \left( \frac{A_t}{A_0} \right) \times 100$$

### 15.1. Lasso peptide L1

#### 15.1.1. Analytical HPLC traces

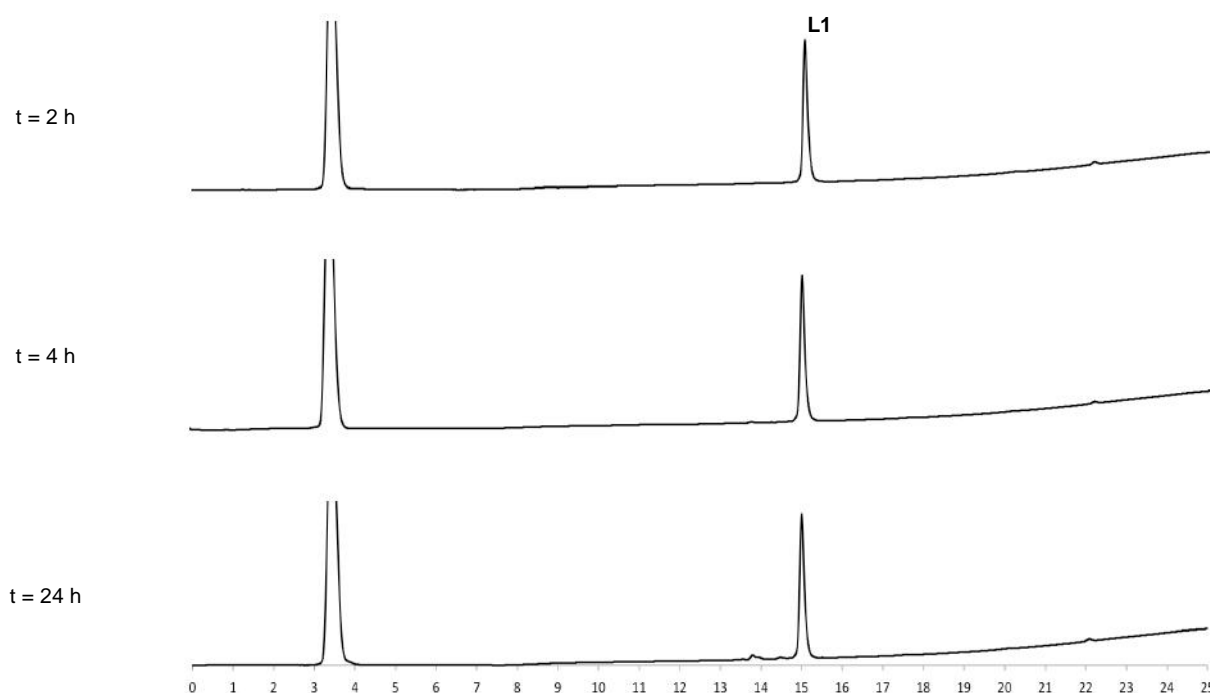

Fig. S120. Chymotrypsin assay of L1

## 15.2. Branched-cyclic peptide B1

### 15.2.1. Analytical HPLC traces

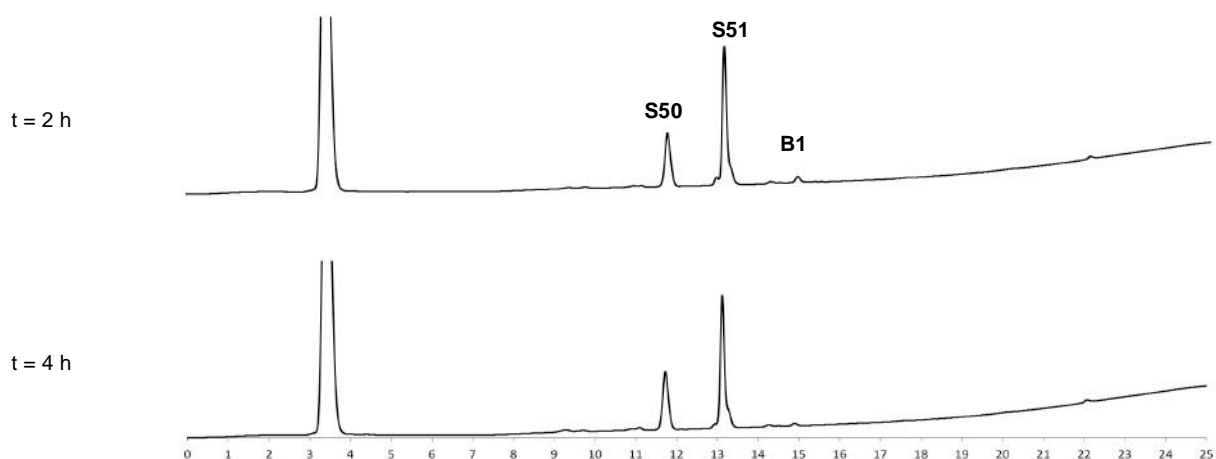

Fig. S121. Chymotrypsin assay of B1

### 15.2.2. Characterization of degradation products

#### Degradation product S50

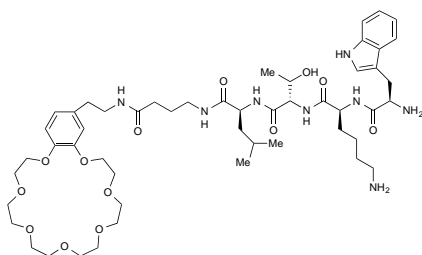

HRMS (MALDI) calcd for  $C_{51}H_{81}N_8O_{13}$   $[M+H]^+$ : 1013.5918, found: 1013.5905.

20 to 95%  $CH_3CN$  with 0.1% TFA in 17 min

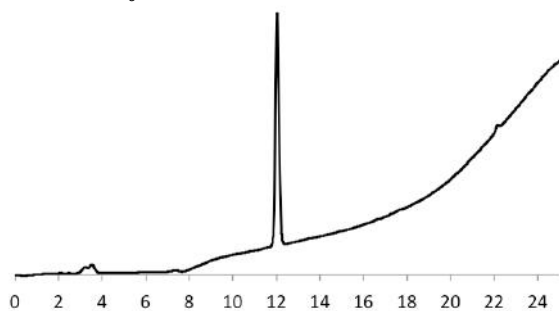

Fig. S122. Analytical HPLC of purified S50

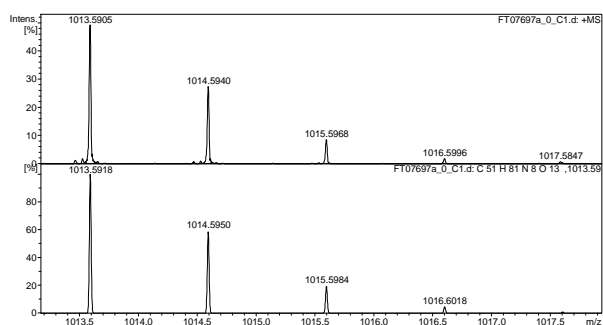

Fig. S123. HRMS (MALDI) of measured (top) and calculated (bottom) isotopic pattern of S50



Degradation product **S51**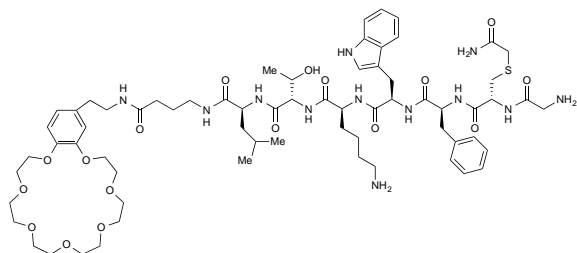

HRMS (MALDI) calcd for  $C_{67}H_{101}N_{12}O_{17}S$   $[M+H]^+$ : 1377.7123, found: 1377.7121.

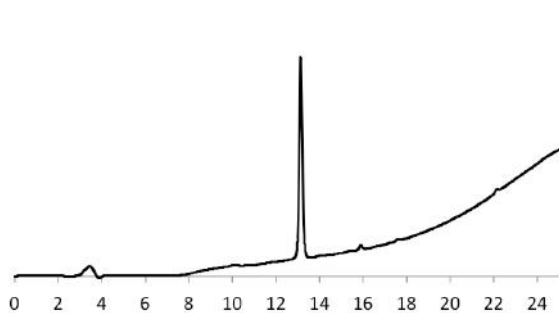

Fig. S124. Analytical HPLC of purified **S51**

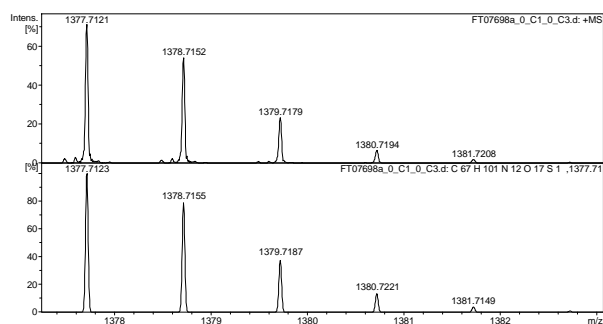

Fig. S125. HRMS (MALDI) of measured (top) and calculated (bottom) isotopic pattern of **S51**

15.3. Lasso peptide **L2**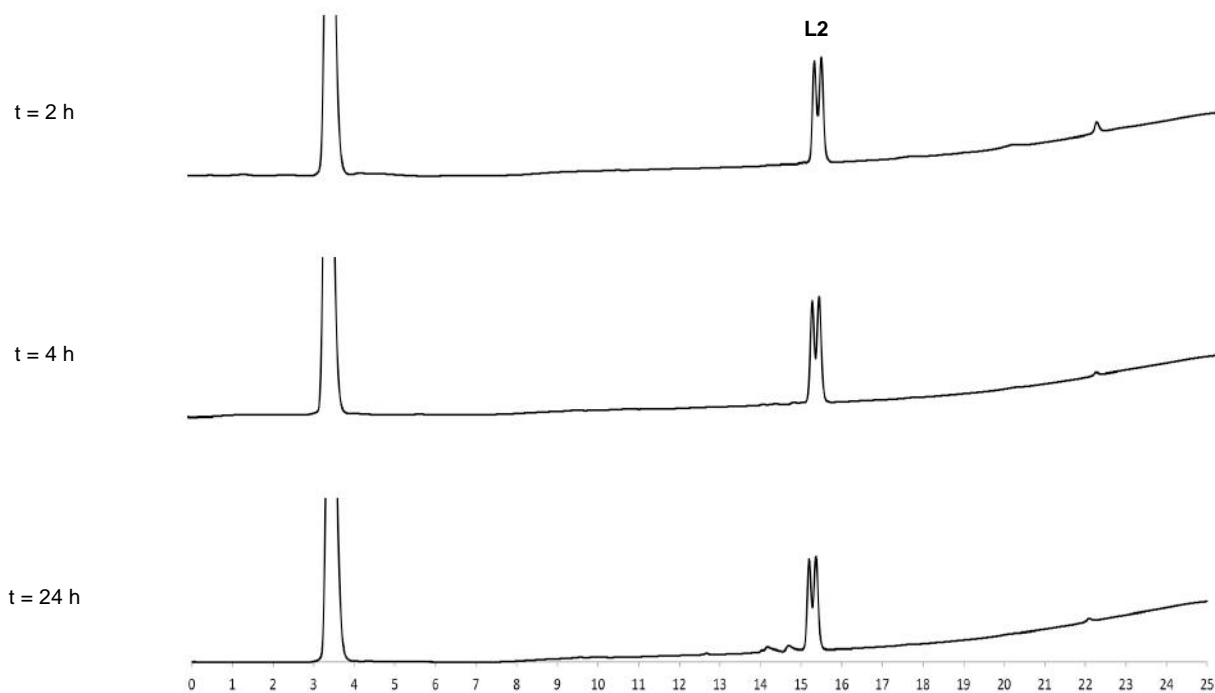

Fig. S126. Chymotrypsin assay of **L2**

## 15.4. Branched-cyclic peptide B2

### 15.4.1. Analytical HPLC traces

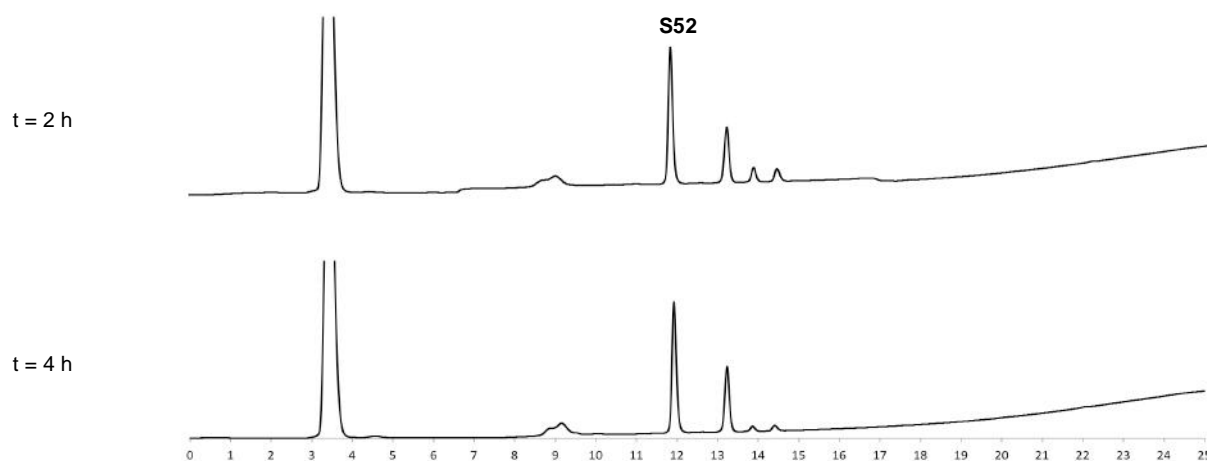

Fig. S127. Chymotrypsin assay of B2

### 15.4.2. Characterization of degradation products

#### Degradation product S52

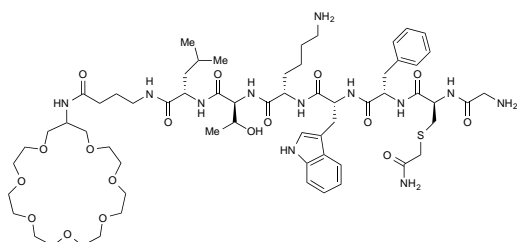

HRMS (MALDI) calcd for  $C_{62}H_{99}N_{12}O_{17}S$   $[M+H]^+$ : 1315.6966, found: 1315.6964.

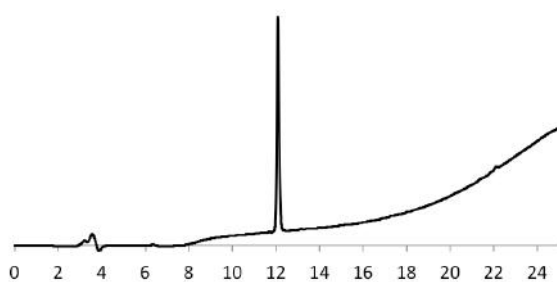

Fig. S128. Analytical HPLC of purified S52

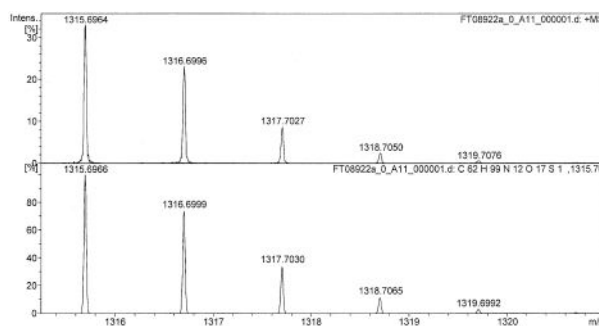

Fig. S129. HRMS (MALDI) of measured (top) and calculated (bottom) isotopic pattern of S52

## 15.5. Lasso peptide L3

## 15.5.1. Analytical HPLC traces

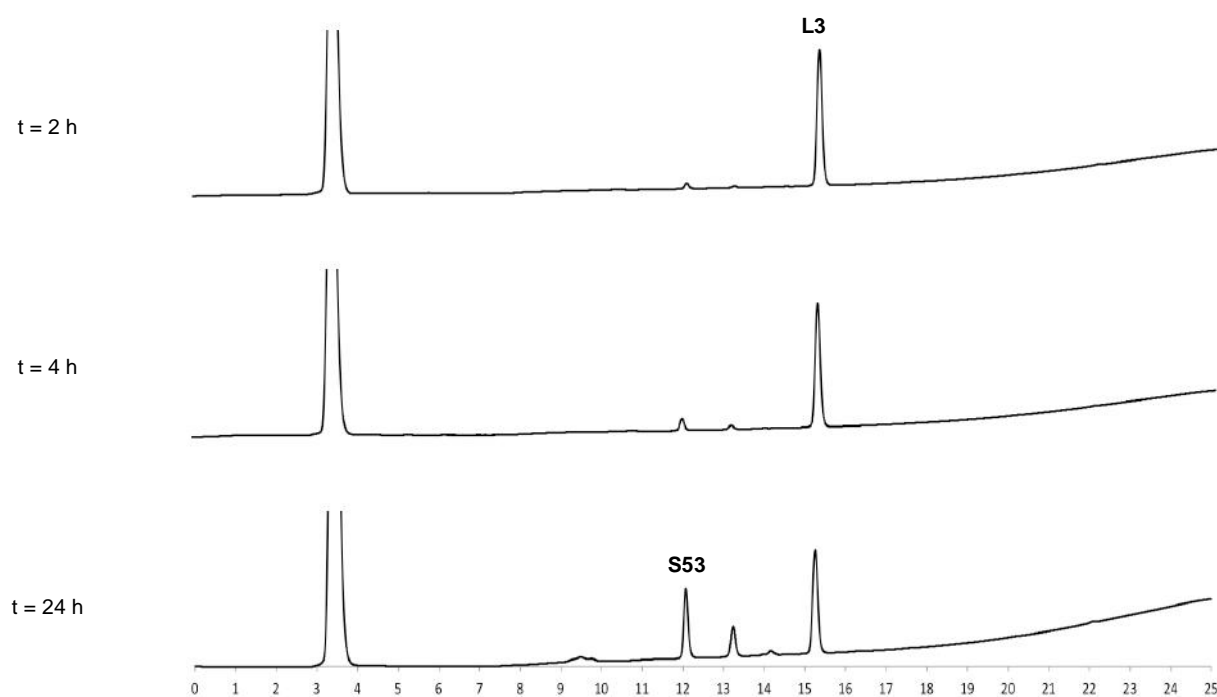

Fig. S130. Chymotrypsin assay of L3

## 15.5.2. Characterization of degradation products

## Degradation product S53

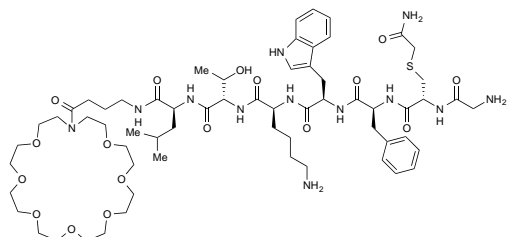

HRMS (MALDI) calcd for  $C_{63}H_{101}N_{12}O_{17}S$   $[M+H]^+$ : 1329.7123, found: 1329.7118.

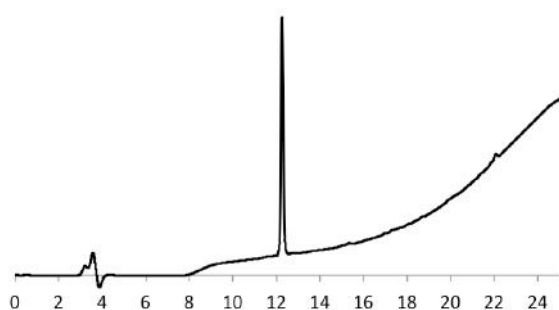

Fig. S131. Analytical HPLC of purified S53

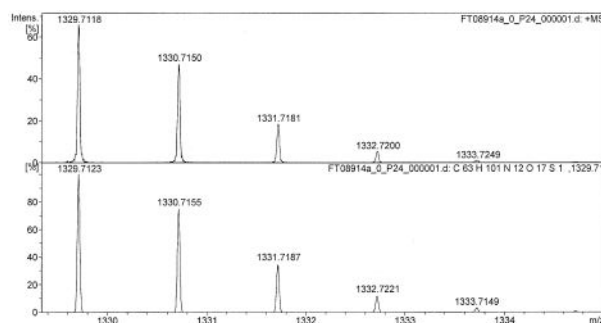

Fig. S132. HRMS (MALDI) of measured (top) and calculated (bottom) isotopic pattern of S53

**15.6. Branched-cyclic peptide B3**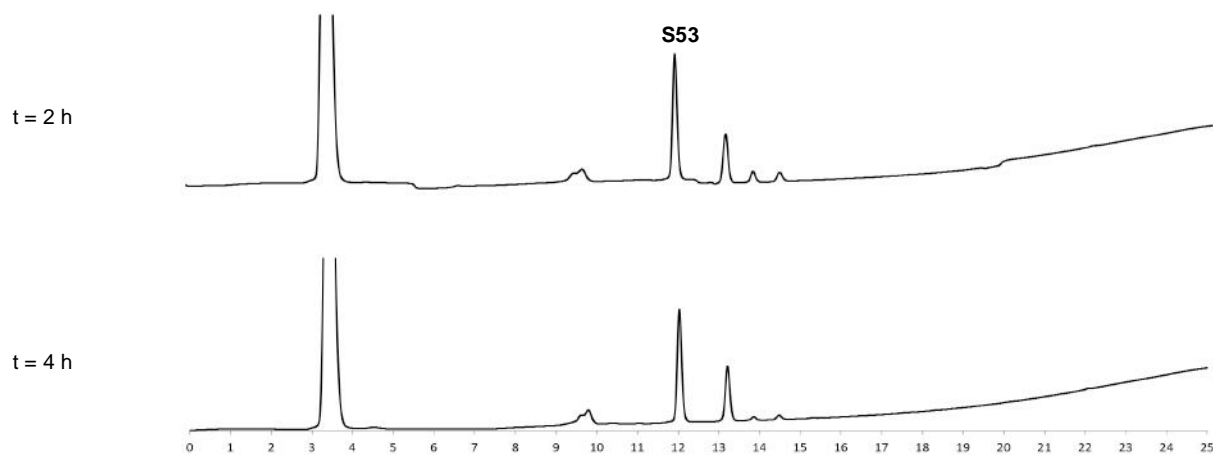**Fig. S133.** Chymotrypsin assay of B3**15.7. Cyclic peptide C1****15.7.1. Analytical HPLC traces**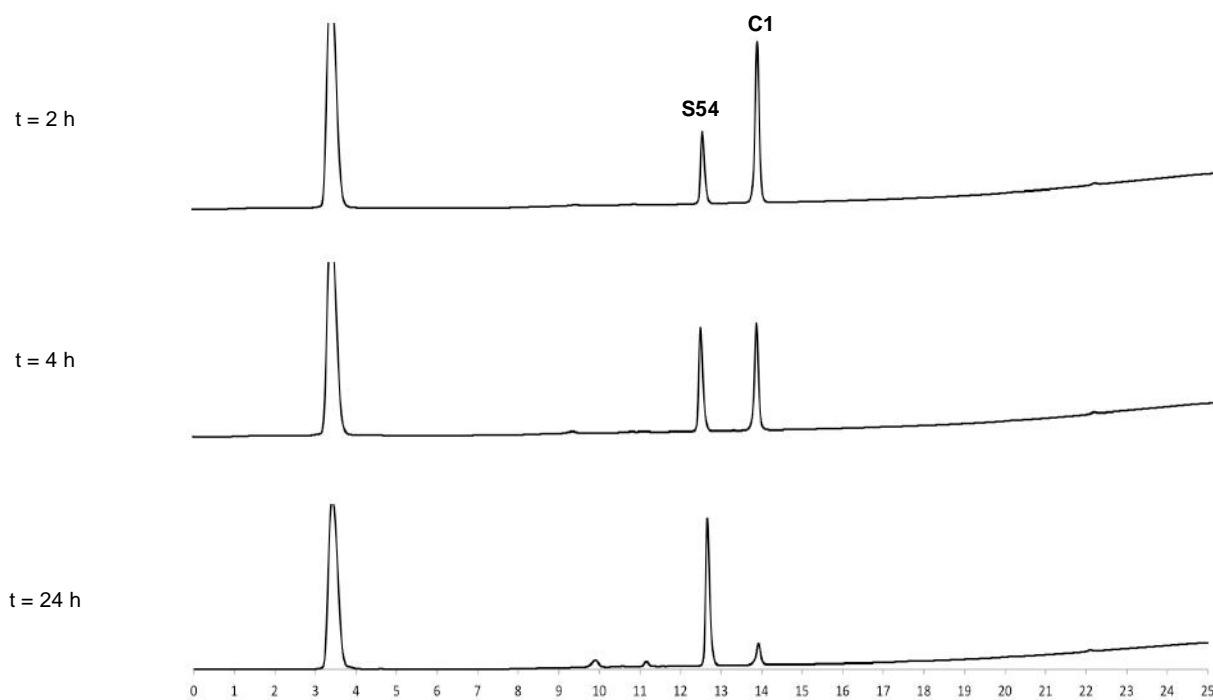**Fig. S134.** Chymotrypsin assay of C1

### 15.7.2. Characterization of degradation products

Degradation product **S54** (Shown here is a possible structure based on specificity of chymotrypsin)

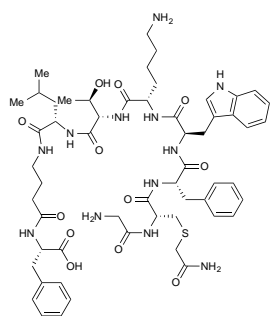

HRMS (MALDI) calcd for  $C_{56}H_{79}N_{12}O_{12}S$   $[M+H]^+$ : 1143.5656, found: 1143.5656.

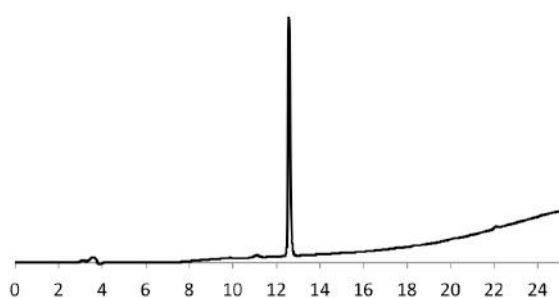

Fig. S135. Analytical HPLC of purified **S54**

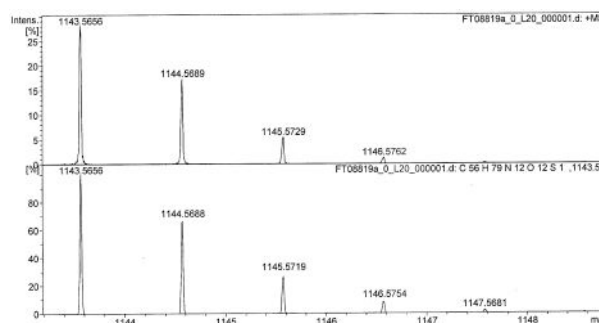

Fig. S136. HRMS (MALDI) of measured (top) and calculated (bottom) isotopic pattern of **S54**

### 15.8. Plots of time vs conversion

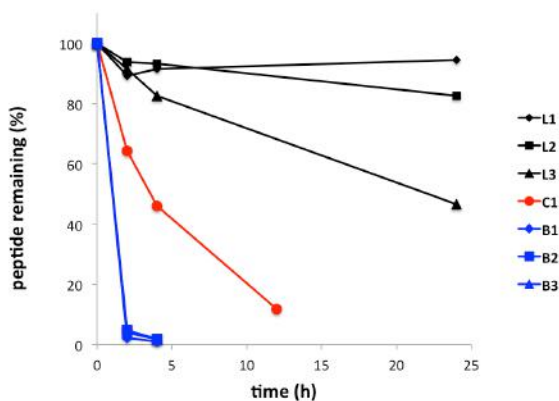

Fig. S137. Plots of time vs conversion (chymotrypsin assay)

## 16. Trypsin assay

A solution of 20  $\mu\text{g}$  of peptide was diluted with 51  $\mu\text{L}$  of a buffer (50 mM Tris-HCl, 1 mM  $\text{CaCl}_2$ , pH 7.6). An aliquot (10  $\mu\text{L}$ ) was taken from this solution, diluted with  $\text{H}_2\text{O}/\text{CH}_3\text{CN}$  (1:1, 10  $\mu\text{L}$ , 0.1% TFA) and injected to analytical RP-HPLC. The peak area of the peptide was determined by integration.

A solution of 20  $\mu\text{g}$  of peptide was diluted with 50  $\mu\text{L}$  of a buffer (50 mM Tris-HCl, 1 mM  $\text{CaCl}_2$ , pH 7.6). To this solution was added trypsin dissolved in the same buffer (1.0  $\mu\text{g}/\mu\text{L}$ , 1.0  $\mu\text{L}$ ). The mixture was incubated at RT for 8 h and analyzed at selected time points: 2, 4, and 8 h for lasso peptides and cyclic peptide; 2 and 4 h for branched-cyclic peptides. For analysis, an aliquot (10  $\mu\text{L}$ ) was taken from the reaction mixture, diluted with  $\text{H}_2\text{O}/\text{CH}_3\text{CN}$  (1:1, 10  $\mu\text{L}$ , 0.1% TFA) and injected to analytical RP-HPLC. The peak area of the starting peptide was determined by integration. Percentage of the remaining peptide was calculated as described in ESI section 15.

### 16.1. Lasso peptide L1

#### 16.1.1. Analytical HPLC traces

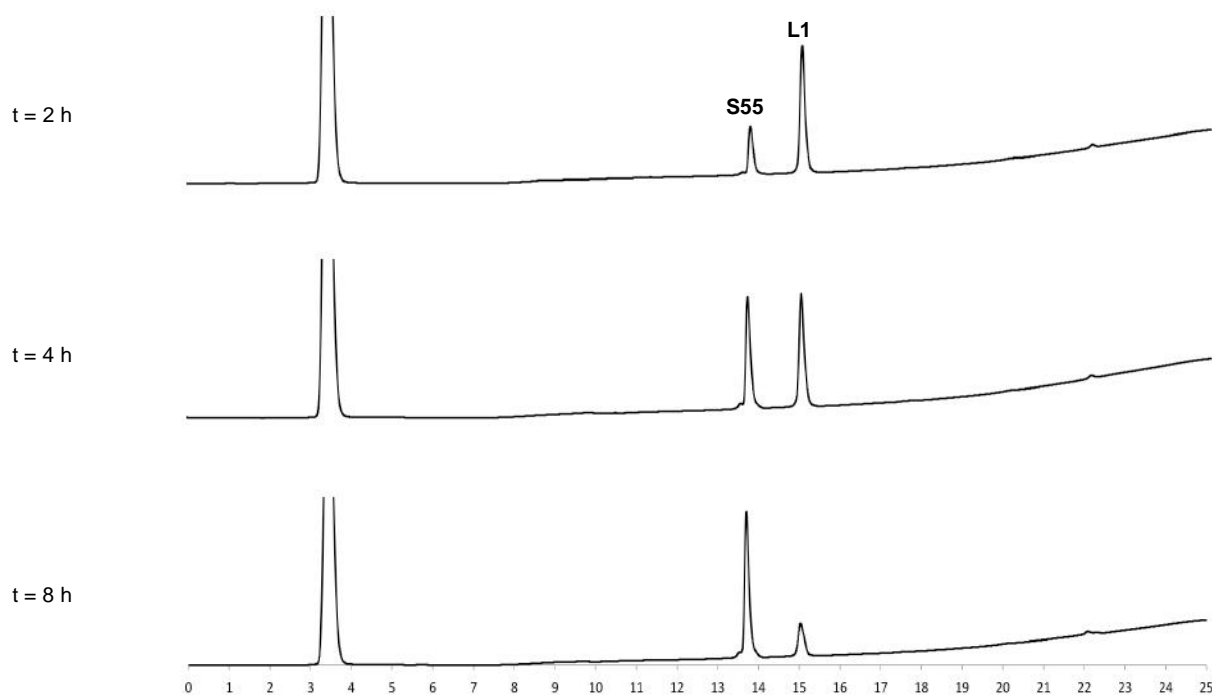

Fig. S138. Trypsin assay of L1

## 16.1.2. Characterization of degradation products

Degradation product **S55** (Shown here is a possible structure based on specificity of trypsin)

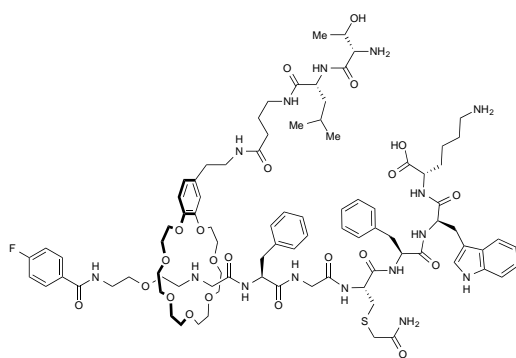

HRMS (MALDI) calcd for  $C_{89}H_{127}FN_{15}O_{22}S$   $[M+H]^+$ : 1808.8979, found: 1808.8985.

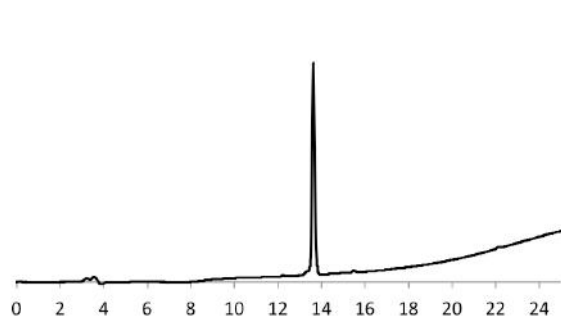

Fig. S139. Analytical HPLC of purified **S55**

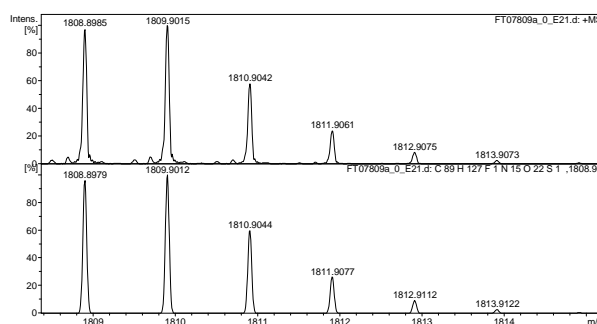

Fig. S140. HRMS (MALDI) of measured (top) and calculated (bottom) isotopic pattern of **S55**

## 16.2. Branched-cyclic peptide B1

### 16.2.1. Analytical HPLC traces

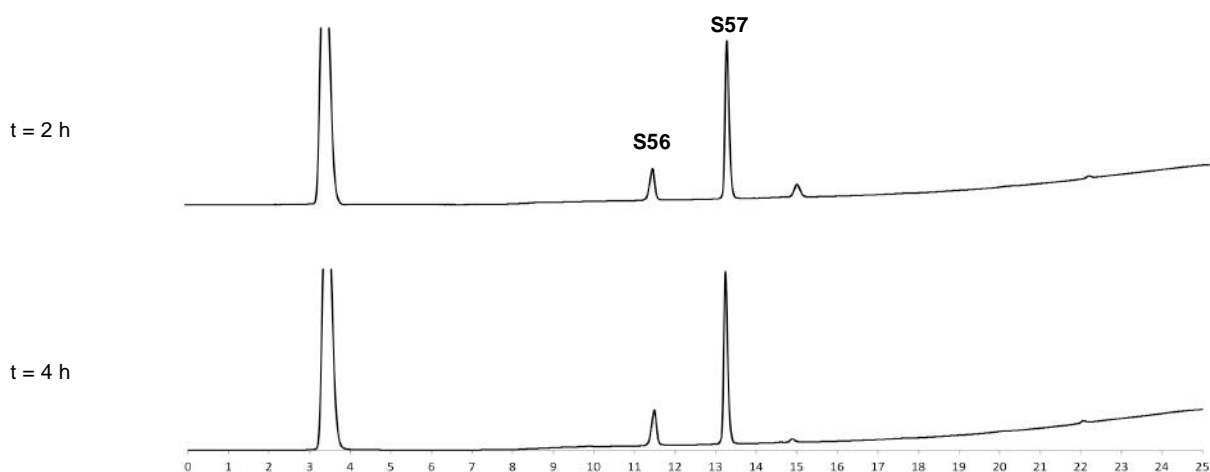

Fig. S141. Trypsin assay of **B1**

## 16.2.2. Characterization of degradation products

Degradation product **S56**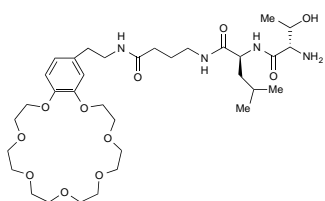

HRMS (MALDI) calcd for  $C_{34}H_{59}N_4O_{11}$   $[M+H]^+$ : 699.4175, found: 699.4166.

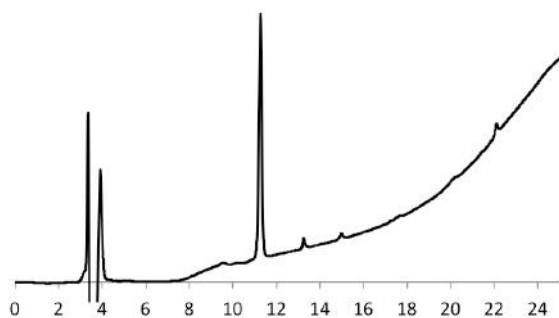

Fig. S142. Analytical HPLC of purified **S56**

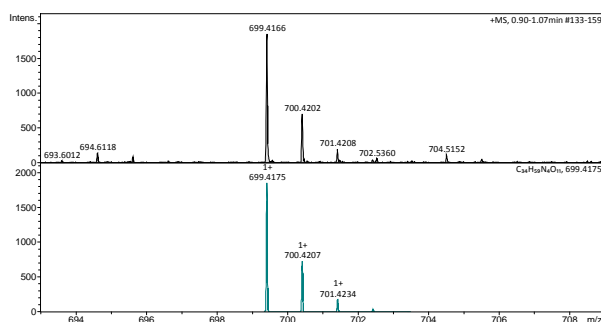

Fig. S143. HRMS (ESI) of measured (top) and calculated (bottom) isotopic pattern of **S56**

Degradation product **S57**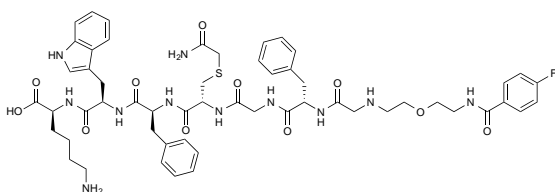

HRMS (MALDI) calcd for  $C_{55}H_{69}FN_{11}O_{11}S$   $[M+H]^+$ : 1110.4877, found: 1110.4855.

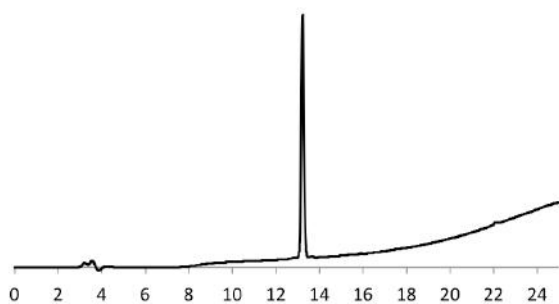

Fig. S144. Analytical HPLC of purified **S57**

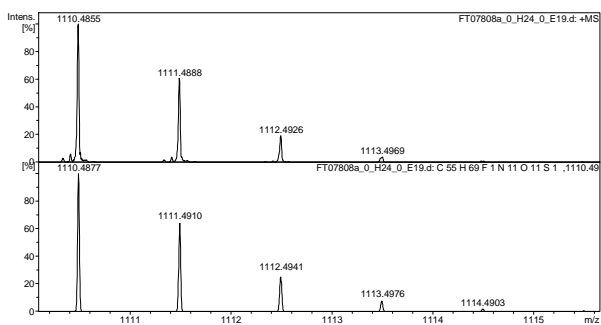

Fig. S145. HRMS (MALDI) of measured (top) and calculated (bottom) isotopic pattern of **S57**



### 16.3. Lasso peptide L2

#### 16.3.1. Analytical HPLC traces

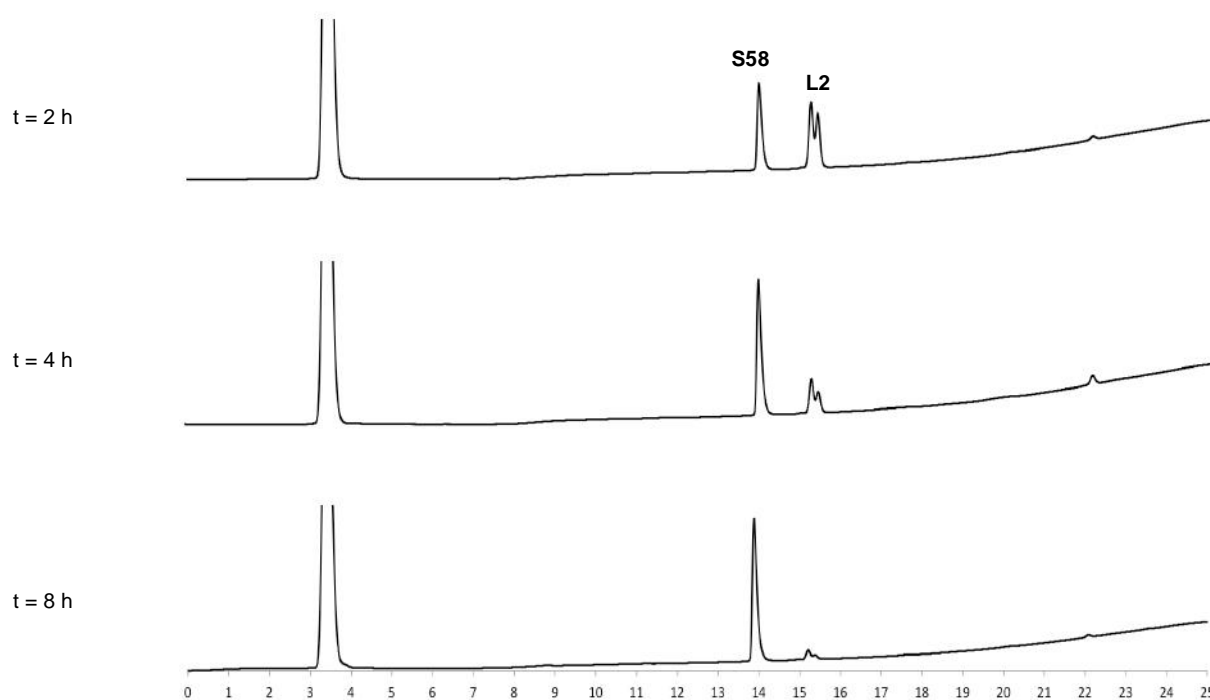

Fig. S146. Trypsin assay of L2

#### 16.3.2. Characterization of degradation products

Degradation product **S58** (Shown here is a possible structure based on specificity of trypsin)

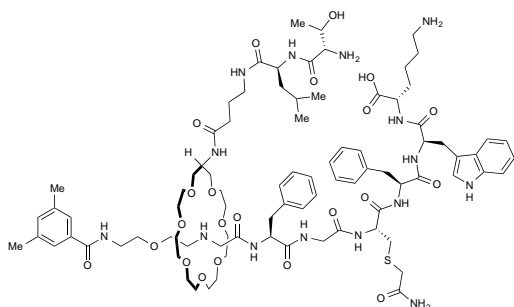

HRMS (MALDI) calcd for  $C_{86}H_{130}N_{15}O_{22}S$   $[M+H]^+$ : 1756.9230, found: 1756.9229.

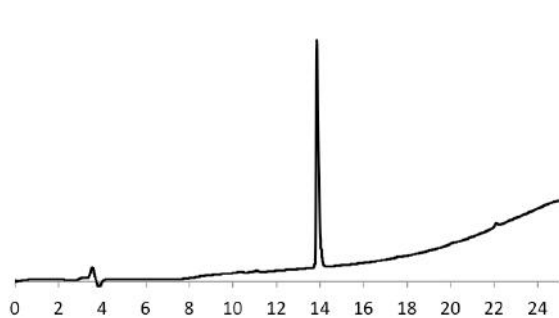

Fig. S147. Analytical HPLC of purified **S58**

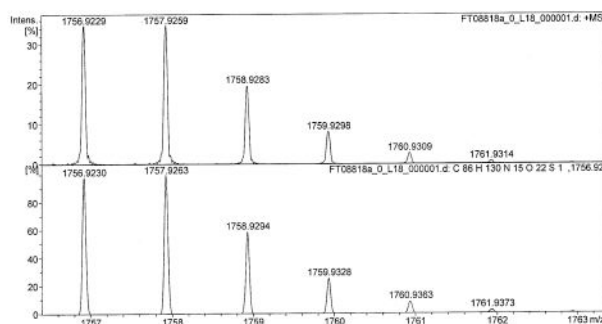

Fig. S148. HRMS (MALDI) of measured (top) and calculated (bottom) isotopic pattern of **S58**

## 16.4. Branched-cyclic peptide B2

### 16.4.1. Analytical HPLC traces

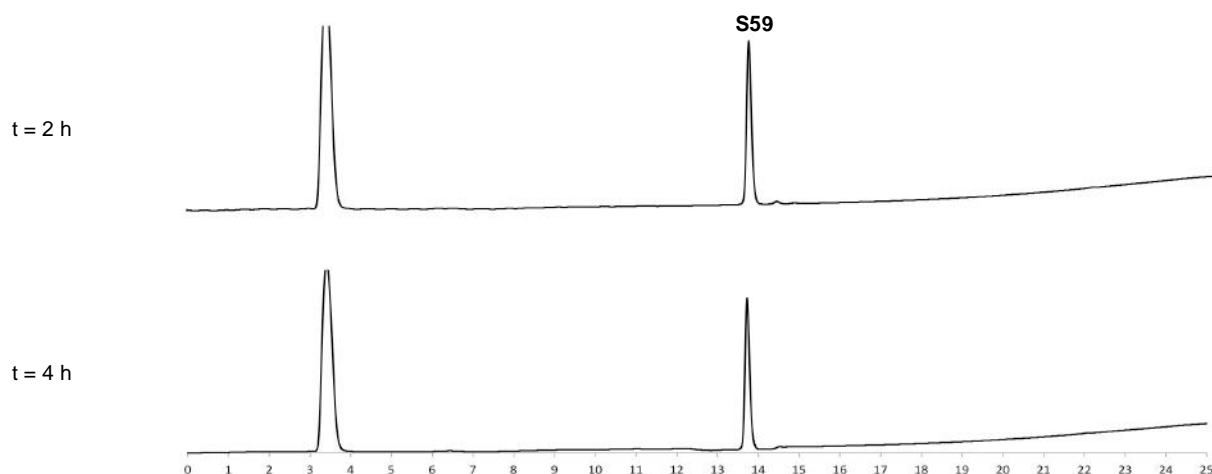

Fig. S149. Trypsin assay of B2

### 16.4.2. Characterization of degradation products

#### Degradation product S59

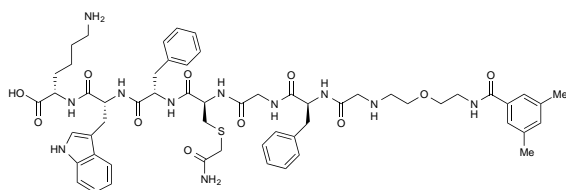

HRMS (MALDI) calcd for  $C_{57}H_{74}N_{11}O_{11}S$   $[M+H]^+$ : 1120.5284, found: 1120.5282.

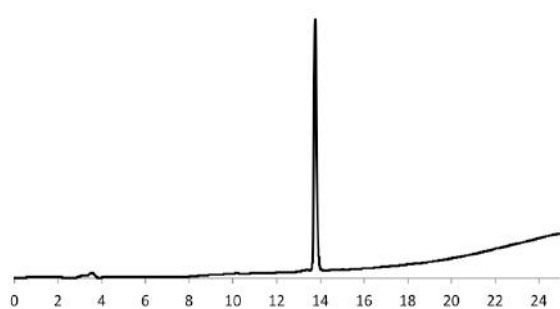

Fig. S150. Analytical HPLC of purified S59

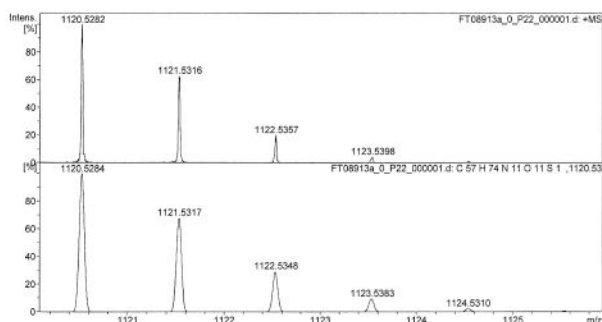

Fig. S151. HRMS (MALDI) of measured (top) and calculated (bottom) isotopic pattern of S59

## 16.5. Lasso peptide L3

### 16.5.1. Analytical HPLC traces

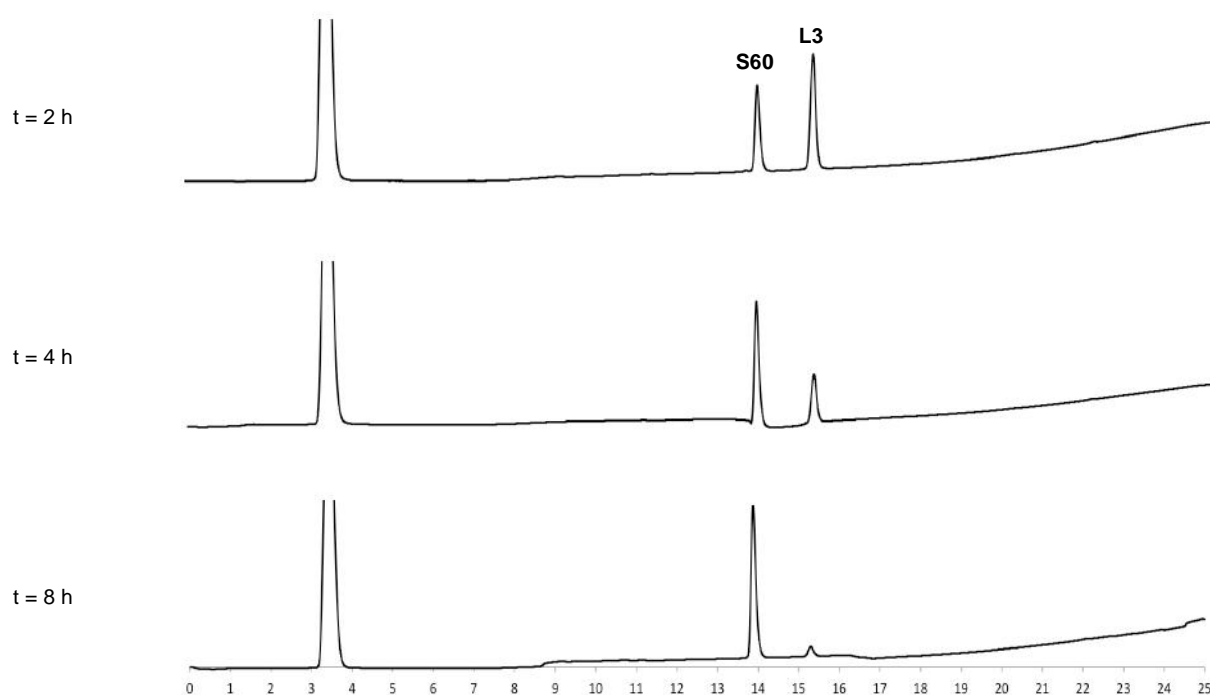

Fig. S152. Trypsin assay of L3

### 16.5.2. Characterization of degradation products

Degradation product **S60** (Shown here is a possible structure based on specificity of trypsin)

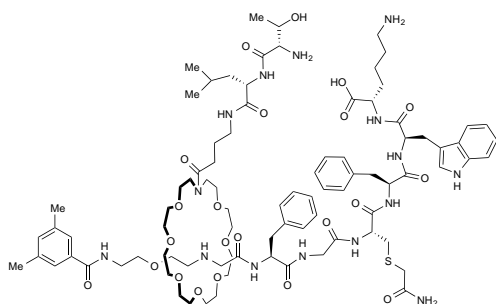

HRMS (MALDI) calcd for  $C_{87}H_{132}N_{15}O_{22}S$   $[M+H]^+$ : 1770.9387, found: 1770.9372.

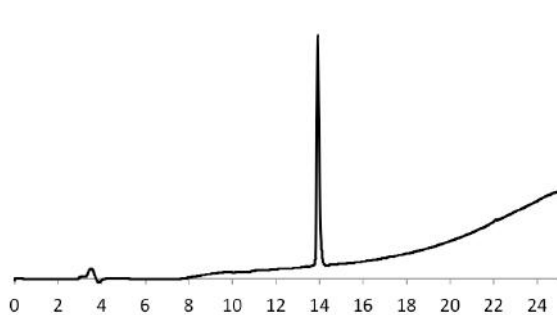

Fig. S153. Analytical HPLC of purified **S60**

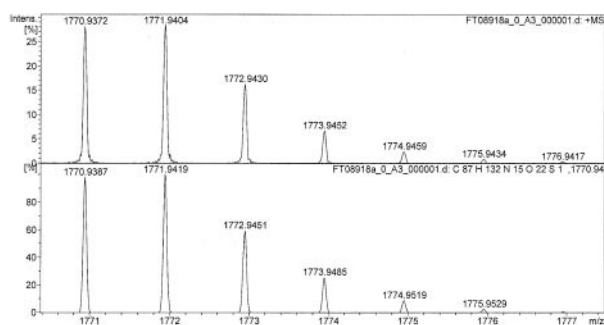

Fig. S154. HRMS (MALDI) of measured (top) and calculated (bottom) isotopic pattern of **S60**

**16.6. Branched-cyclic peptide B3**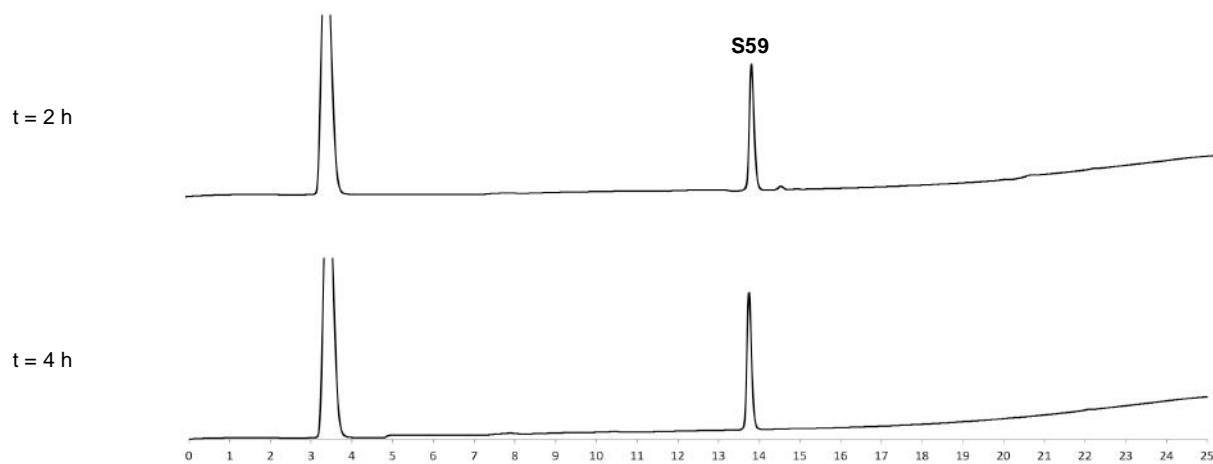**Fig. S155.** Trypsin assay of B3**16.7. Cyclic peptide C1****16.7.1. Analytical HPLC traces**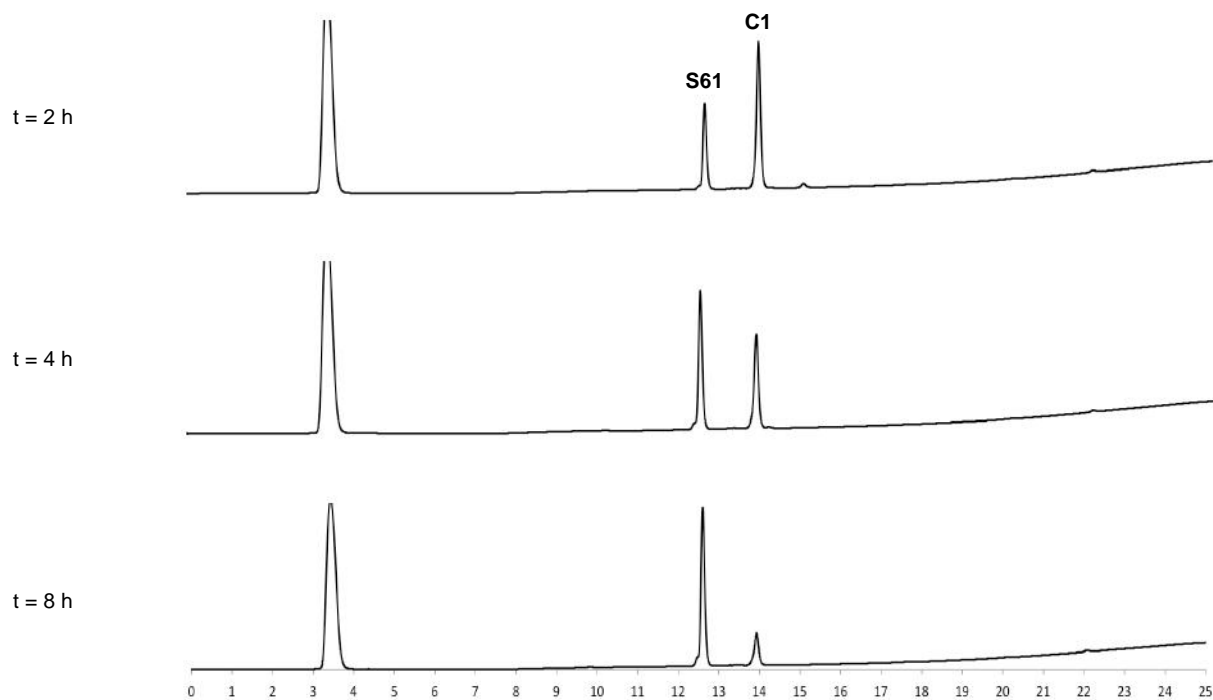**Fig. S156.** Trypsin assay of C1

### 16.7.2. Characterization of degradation products

Degradation product **S61** (Shown here is a possible structure based on specificity of trypsin)

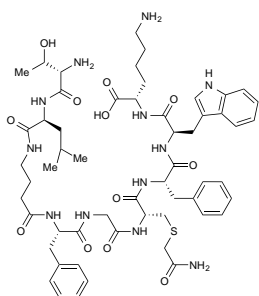

HRMS (MALDI) calcd for  $C_{56}H_{79}N_{12}O_{12}S$   $[M+H]^+$ : 1143.5656, found: 1143.5656.

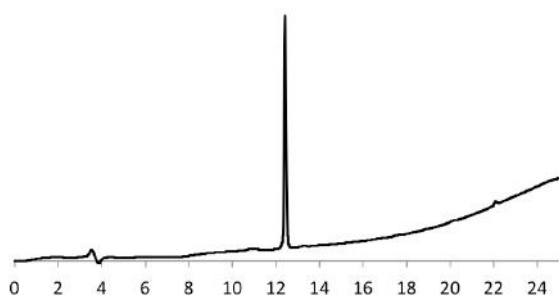

Fig. S157. Analytical HPLC of purified **S61**

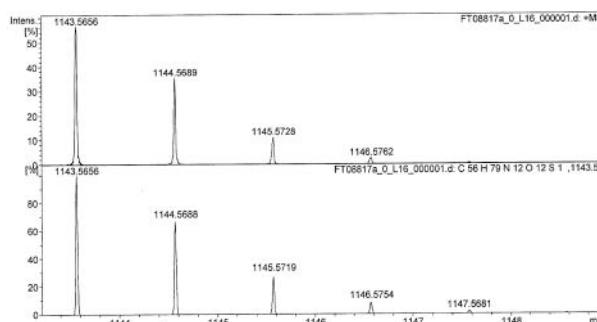

Fig. S158. HRMS (MALDI) of measured (top) and calculated (bottom) isotopic pattern of **S61**

### 16.8. Plots of time vs conversion

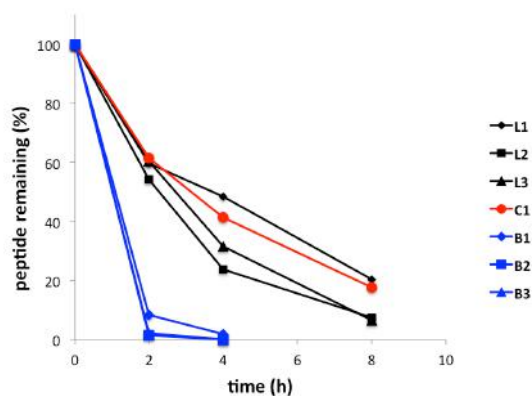

Fig. S159. Plots of time vs conversion (trypsin assay)

## 17. Proteinase K assay

A solution of 20  $\mu\text{g}$  of peptide was diluted with 51  $\mu\text{L}$  of a buffer (50 mM Tris-HCl, pH 7.6). An aliquot (10  $\mu\text{L}$ ) was taken from this solution, diluted with  $\text{H}_2\text{O}/\text{CH}_3\text{CN}$  (1:1, 10  $\mu\text{L}$ , 0.1% TFA) and injected to analytical RP-HPLC. The peak area of the peptide was determined by integration.

A solution of 20  $\mu\text{g}$  of peptide was diluted with 50  $\mu\text{L}$  of a buffer (50 mM Tris-HCl, pH 7.6). To this solution was added proteinase K dissolved in the same buffer (1.0  $\mu\text{g}/\mu\text{L}$ , 1.0  $\mu\text{L}$ ). The mixture was incubated at 37  $^\circ\text{C}$  for 8 h and analyzed at selected time points: 2, 4, and 8 h for lasso peptides and cyclic peptide; 2 and 4 h for branched-cyclic peptides. For analysis, an aliquot (10  $\mu\text{L}$ ) was taken from the reaction mixture, diluted with  $\text{H}_2\text{O}/\text{CH}_3\text{CN}$  (1:1, 10  $\mu\text{L}$ , 0.1% TFA) and injected to analytical RP-HPLC. The peak area of the starting peptide was determined by integration. Percentage of the remaining peptide was calculated as described in ESI section 15.

### 17.1. Lasso peptide L1

#### 17.1.1. Analytical HPLC traces

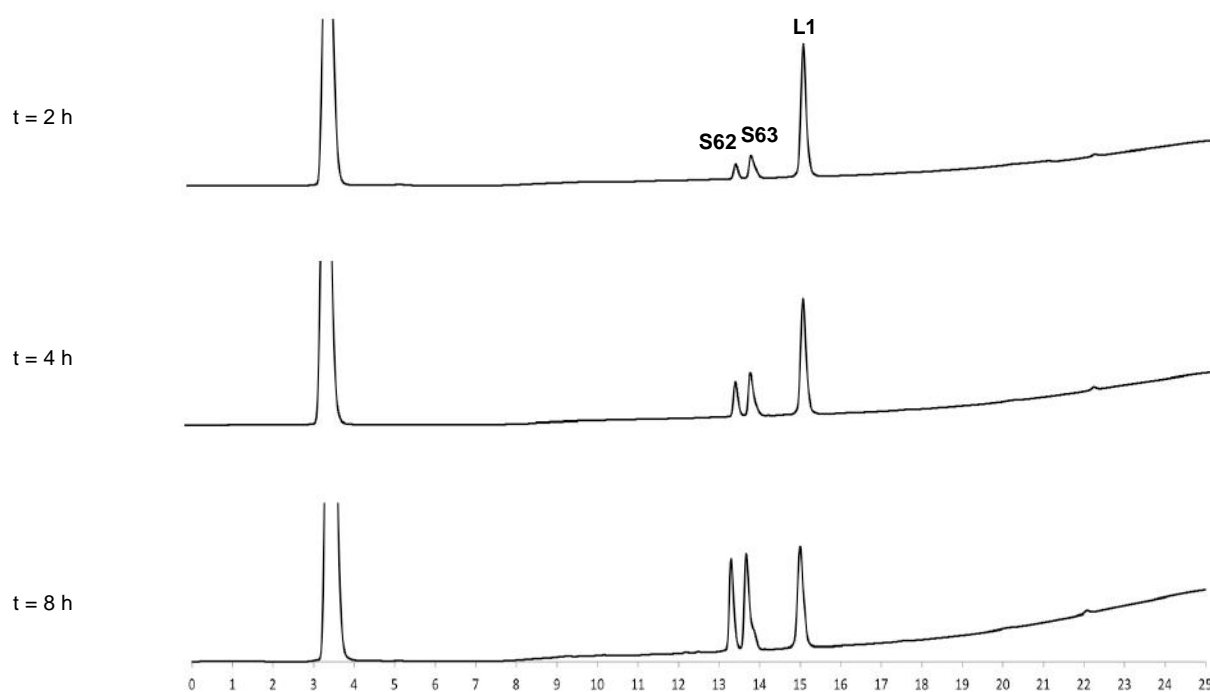

Fig. S160. Proteinase K assay of L1

## 17.1.2. Characterization of degradation products

Degradation product **S62**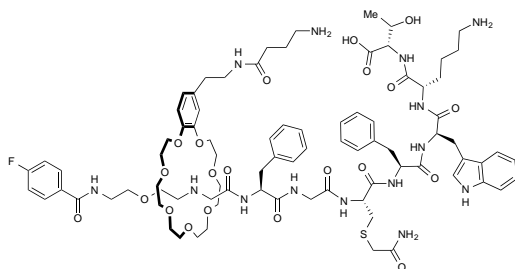

HRMS (MALDI) calcd for  $C_{83}H_{116}FN_{14}O_{21}S$   $[M+H]^+$ : 1695.8139, found: 1695.8110.

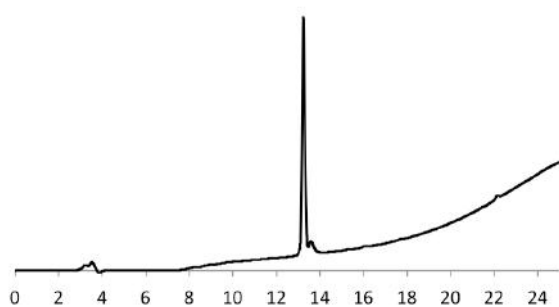

Fig. S161. Analytical HPLC of purified **S62**

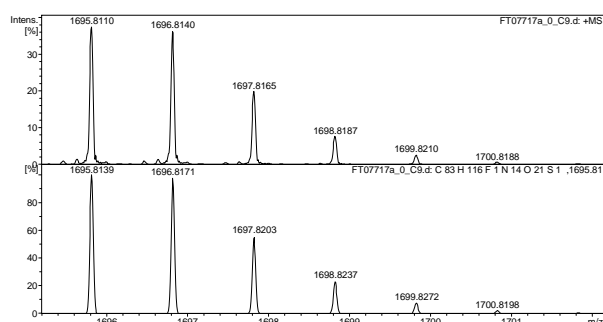

Fig. S162. HRMS (MALDI) of measured (top) and calculated (bottom) isotopic pattern of **S62**

Degradation product **S63** (Shown here is a possible structure based on specificity of proteinase K)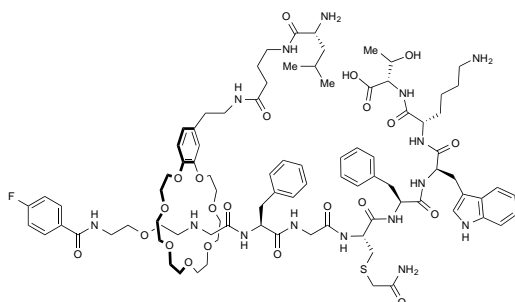

HRMS (MALDI) calcd for  $C_{89}H_{127}FN_{15}O_{22}S$   $[M+H]^+$ : 1808.8979, found: 1808.8987.

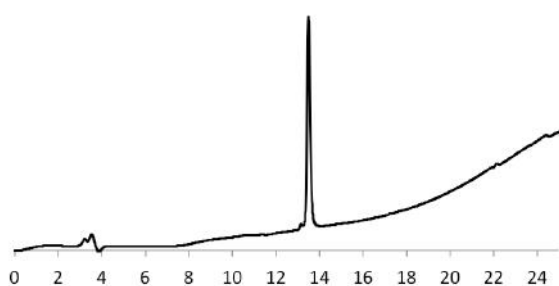

Fig. S163. Analytical HPLC of purified **S63**

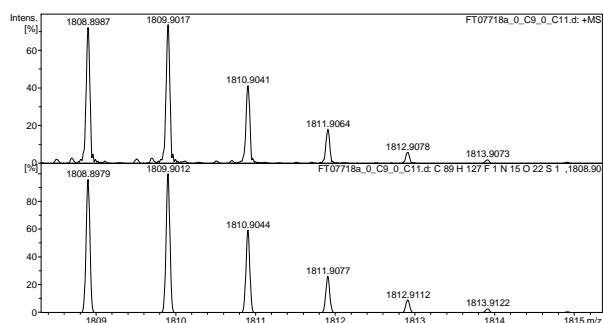

Fig. S164. HRMS (MALDI) of measured (top) and calculated (bottom) isotopic pattern of **S63**

## 17.2. Branched-cyclic peptide B1

### 17.2.1. Analytical HPLC traces

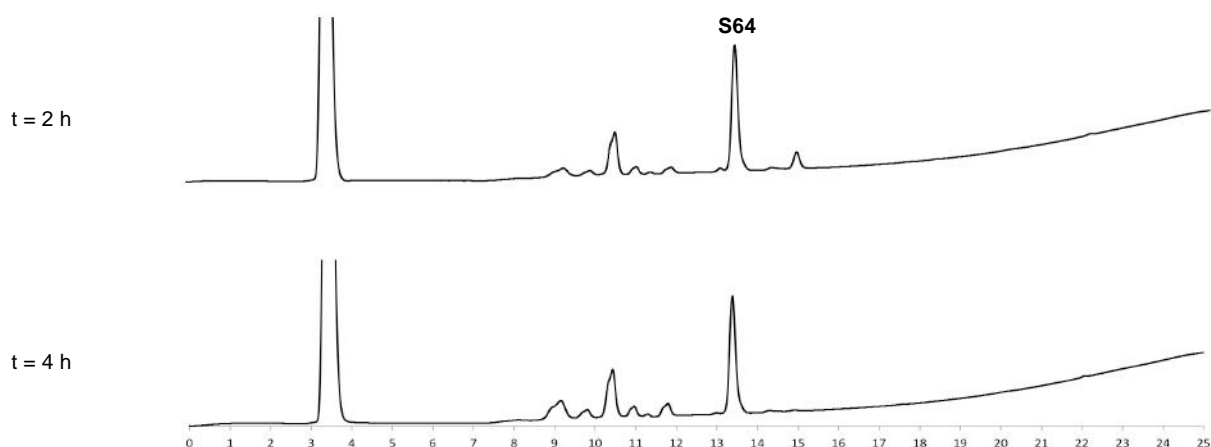

Fig. S165. Proteinase K assay of B1

### 17.2.2. Characterization of degradation products

#### Degradation product S64

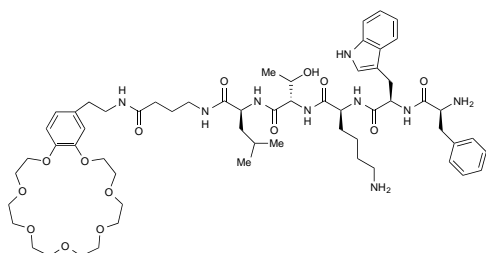

HRMS (MALDI) calcd for  $C_{60}H_{90}N_9O_{14}$   $[M+H]^+$ : 1160.6602, found: 1160.6602.

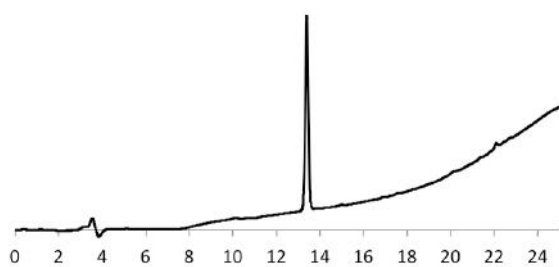

Fig. S166. Analytical HPLC of purified S64

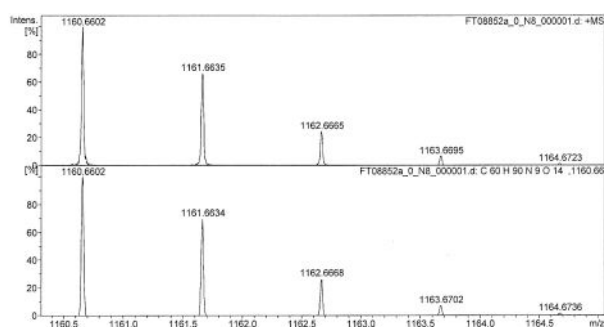

Fig. S167. HRMS (MALDI) of measured (top) and calculated (bottom) isotopic pattern of S64



### 17.3. Lasso peptide L2

#### 17.3.1. Analytical HPLC traces

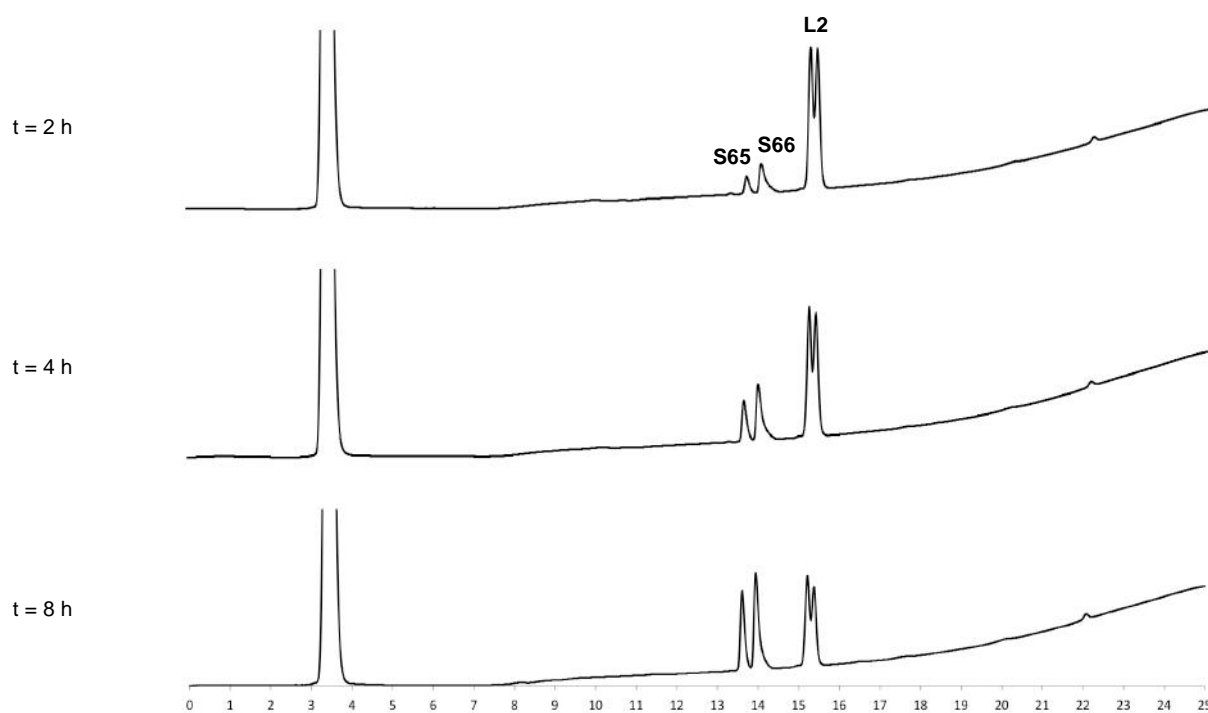

Fig. S168. Proteinase K assay of L2

#### 17.3.2. Characterization of degradation products

##### Degradation product S65

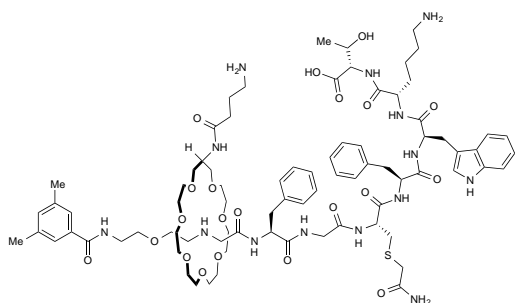

HRMS (MALDI) calcd for  $C_{80}H_{119}N_{14}O_{21}S$   $[M+H]^+$ : 1643.8389, found: 1643.8392.

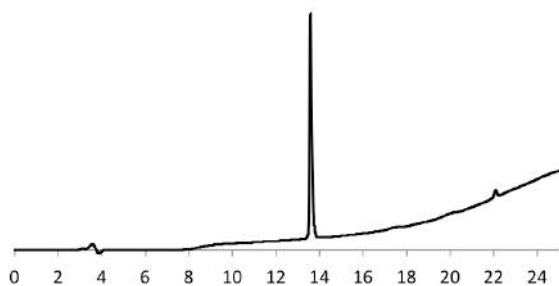

Fig. S169. Analytical HPLC of purified S65

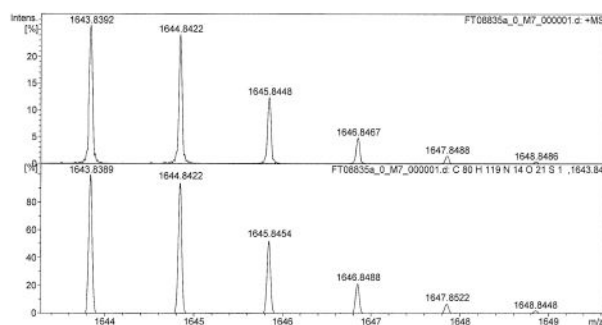

Fig. S170. HRMS (MALDI) of measured (top) and calculated (bottom) isotopic pattern of S65

Degradation product **S66** (Shown here is a possible structure based on specificity of proteinase K)

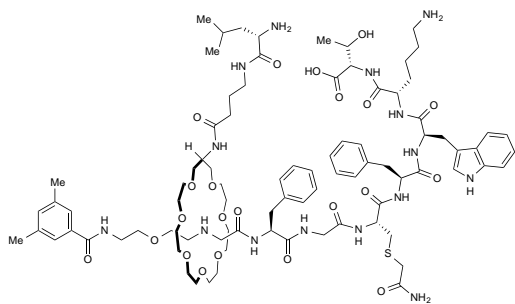

HRMS (MALDI) calcd for  $C_{86}H_{129}N_{15}NaO_{22}S$   $[M+Na]^+$ : 1778.9050, found: 1778.9042.

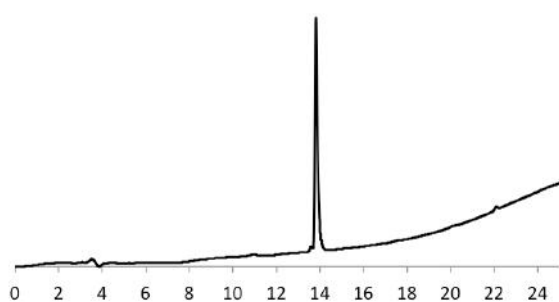

Fig. S171. Analytical HPLC of purified **S66**

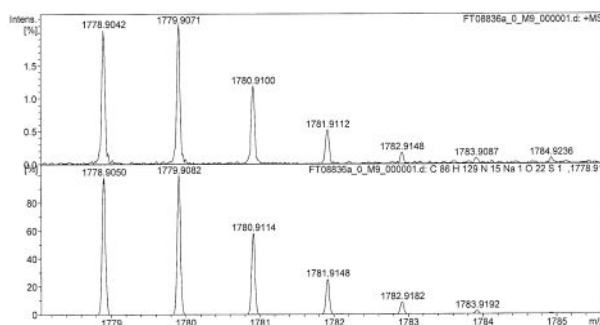

Fig. S172. HRMS (MALDI) of measured (top) and calculated (bottom) isotopic pattern of **S66**

## 17.4. Branched-cyclic peptide **B2**

### 17.4.1. Analytical HPLC traces

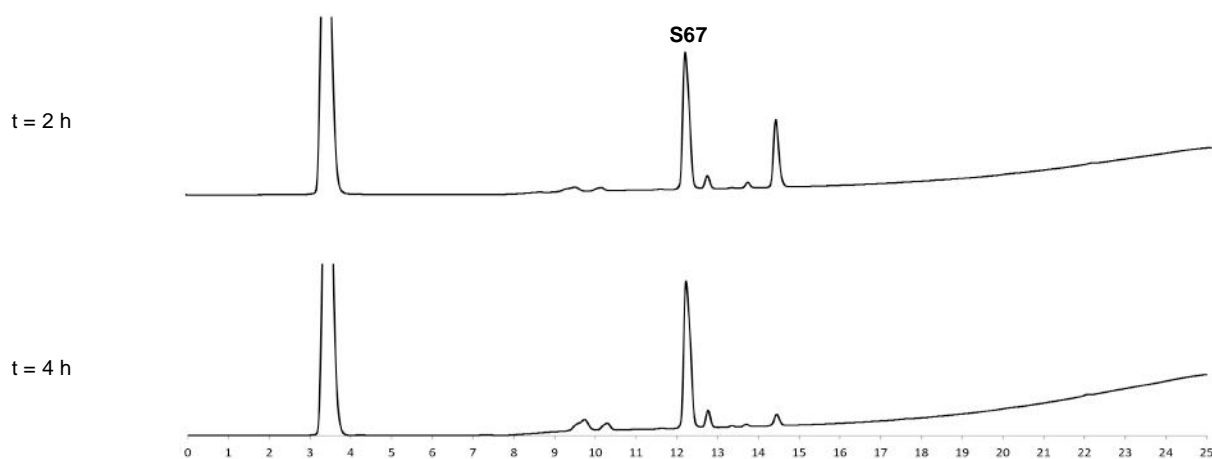

Fig. S173. Proteinase K assay of **B2**

## 17.4.2. Characterization of degradation products

### Degradation product **S67**

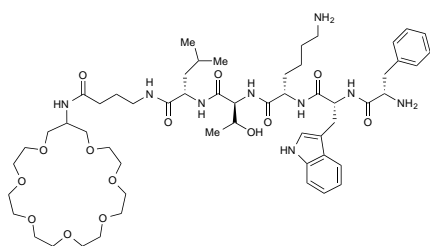

HRMS (MALDI) calcd for  $C_{55}H_{88}N_9O_{14}$   $[M+H]^+$ : 1098.6445, found: 1098.6444.

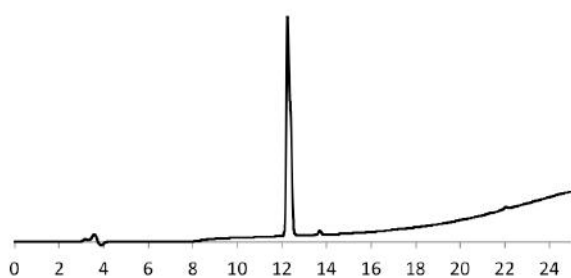

Fig. S174. Analytical HPLC of **S67** (mixture)

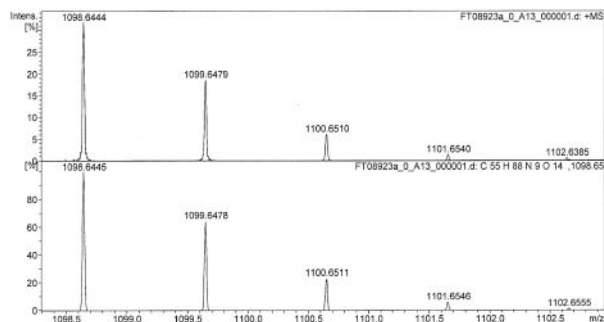

Fig. S175. HRMS (MALDI) of measured (top) and calculated (bottom) isotopic pattern of **S67**

## 17.5. Lasso peptide L3

### 17.5.1. Analytical HPLC traces

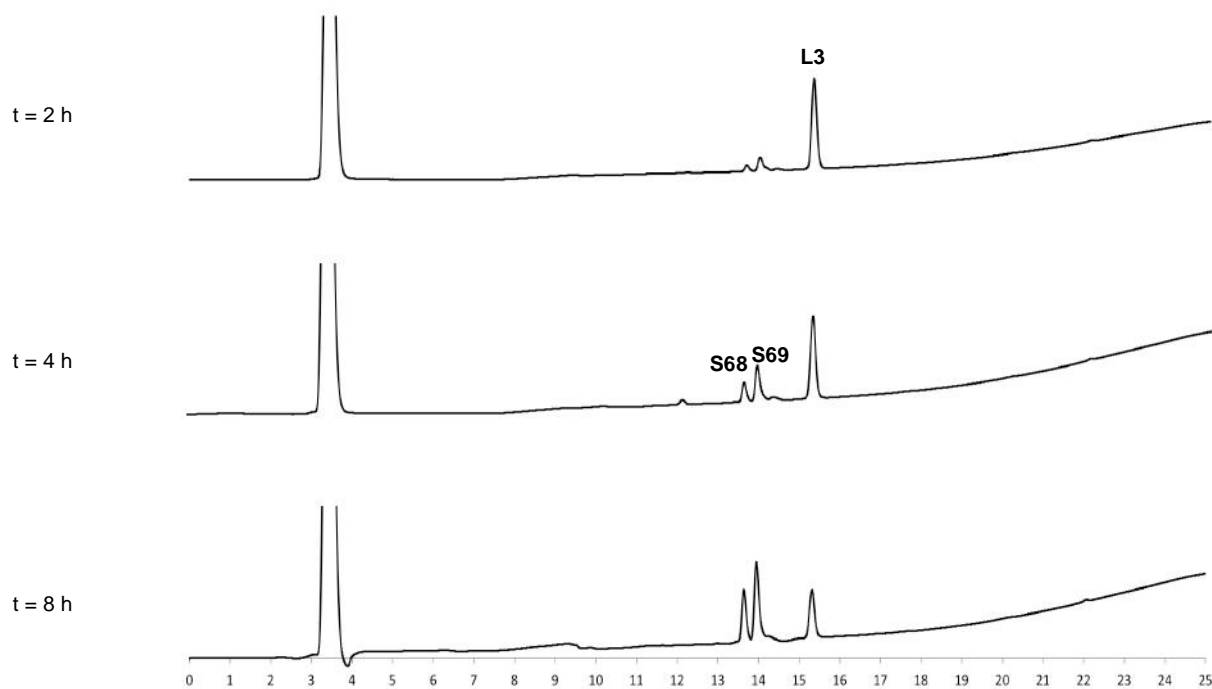

Fig. S176. Proteinase K assay of **L3**

## 17.5.2. Characterization of degradation products

Degradation product **S68**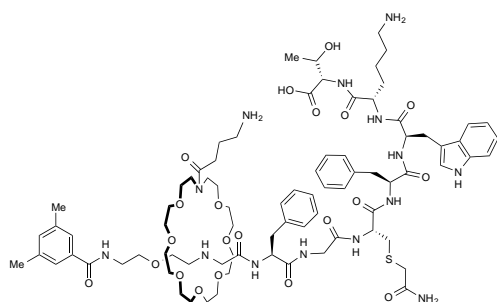

HRMS (MALDI) calcd for  $C_{81}H_{121}N_{14}O_{21}S$   $[M+H]^+$ : 1657.8546, found: 1657.8534.

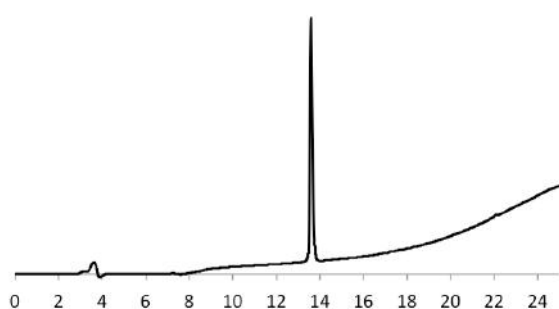

Fig. S177. Analytical HPLC of purified **S68**

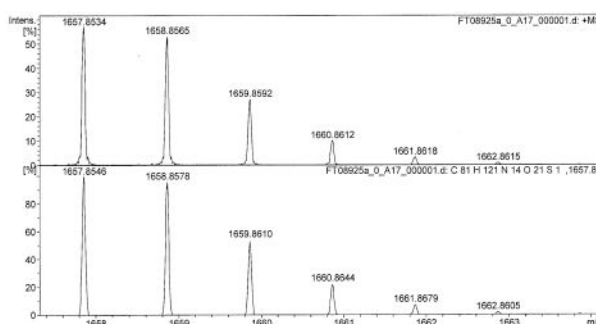

Fig. S178. HRMS (MALDI) of measured (top) and calculated (bottom) isotopic pattern of **S68**

Degradation product **S69** (Shown here is a possible structure based on specificity of proteinase K)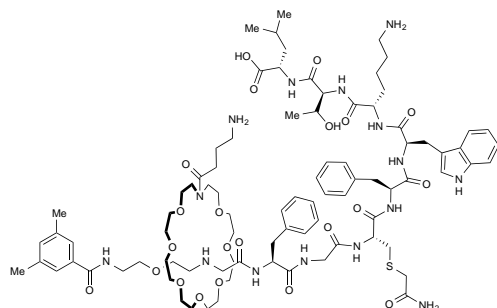

HRMS (MALDI) calcd for  $C_{87}H_{132}N_{15}O_{22}S$   $[M+H]^+$ : 1770.9387, found: 1770.9337.

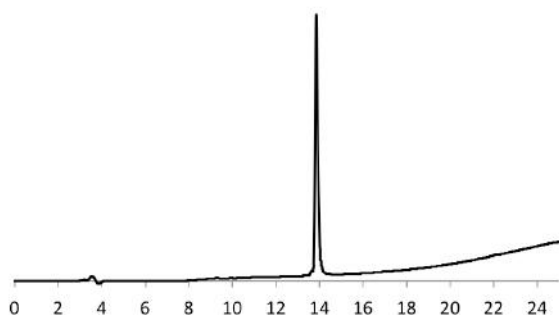

Fig. S179. Analytical HPLC of purified **S69**

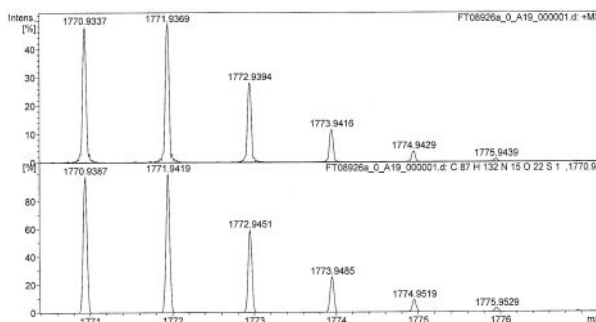

Fig. S180. HRMS (MALDI) of measured (top) and calculated (bottom) isotopic pattern of **S69**

## 17.6. Branched-cyclic peptide B3

### 17.6.1. Analytical HPLC traces

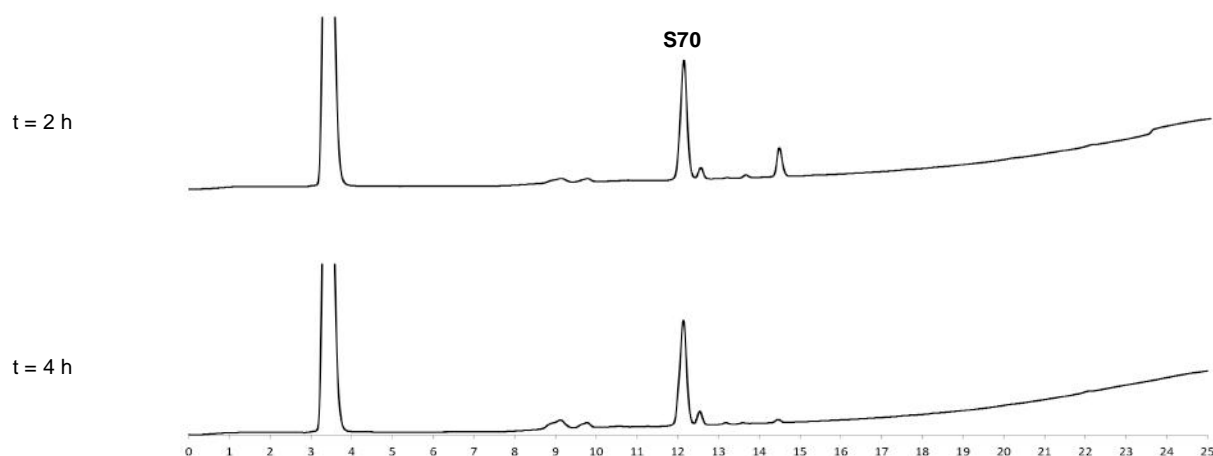

Fig. S181. Proteinase K assay of B3

### 17.6.2. Characterization of degradation products

#### Degradation product S70

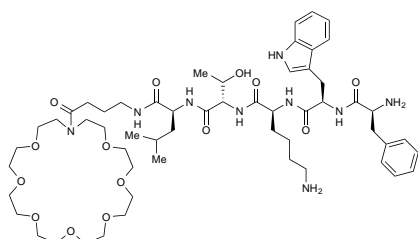

HRMS (MALDI) calcd for  $C_{56}H_{90}N_9O_{14}$   $[M+H]^+$ : 1112.6602, found: 1112.6606.

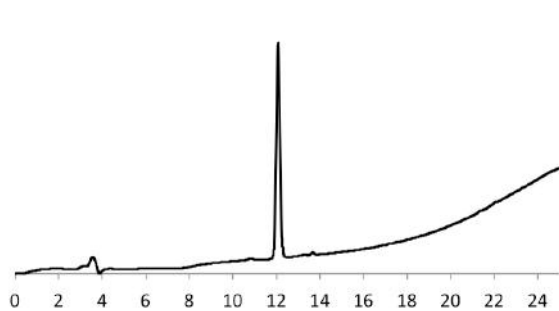

Fig. S182. Analytical HPLC of S70 (mixture)

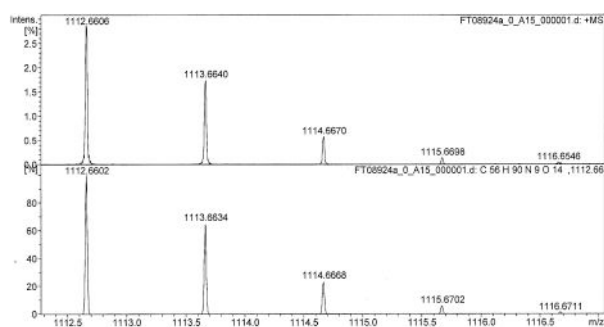

Fig. S183. HRMS (MALDI) of measured (top) and calculated (bottom) isotopic pattern of S70

## 17.7. Cyclic peptide C1

### 17.7.1. Analytical HPLC traces

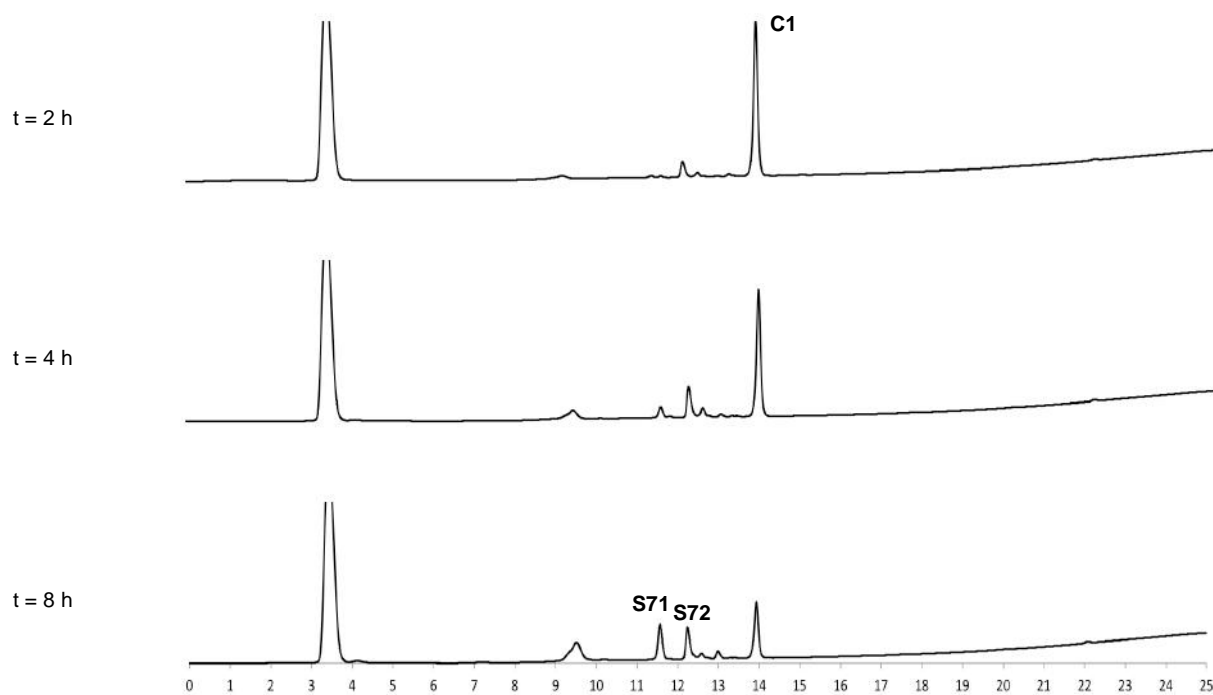

Fig. S184. Proteinase K assay of C1

### 17.7.2. Characterization of degradation products

#### Degradation product S71

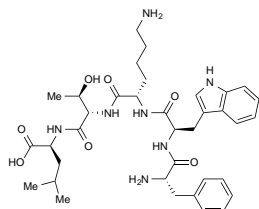

HRMS (MALDI) calcd for  $C_{36}H_{52}N_7O_7$   $[M+H]^+$ : 694.3923, found: 694.3921.

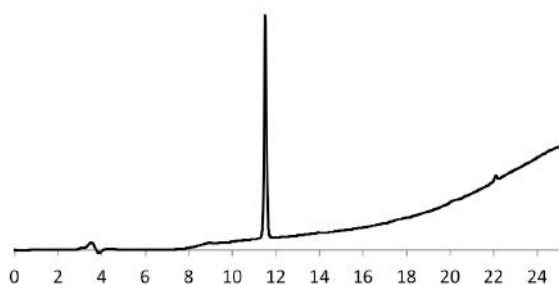

Fig. S185. Analytical HPLC of purified S71

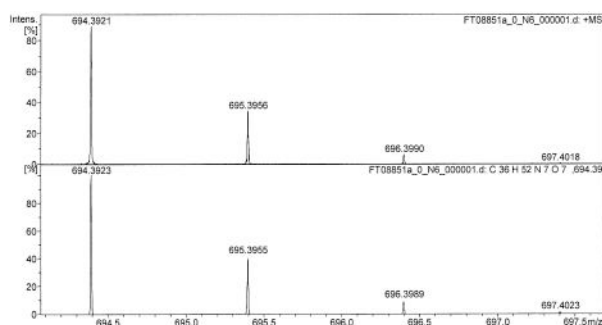

Fig. S186. HRMS (MALDI) of measured (top) and calculated (bottom) isotopic pattern of S71

Degradation product **S72** (Shown here is a possible structure based on specificity of proteinase K)

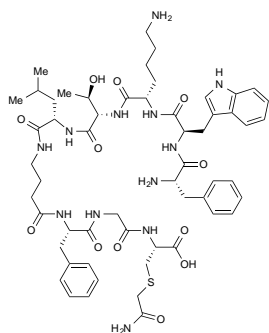

HRMS (MALDI) calcd for  $C_{56}H_{79}N_{12}O_{12}S$   $[M+H]^+$ : 1143.5656, found: 1143.5650.

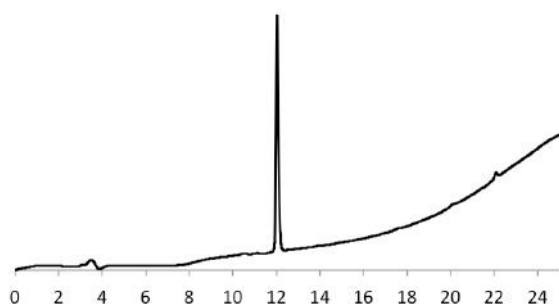

Fig. S187. Analytical HPLC of purified **S72**

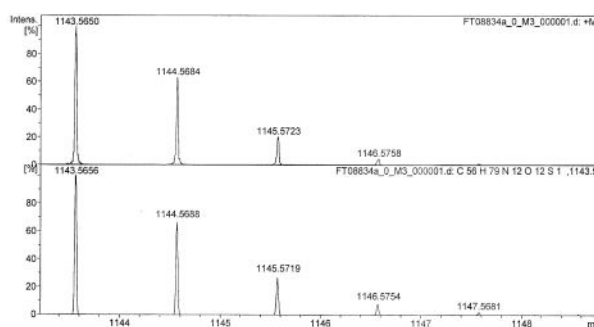

Fig. S188. HRMS (MALDI) of measured (top) and calculated (bottom) isotopic pattern of **S72**

### 17.8. Plots of time vs conversion

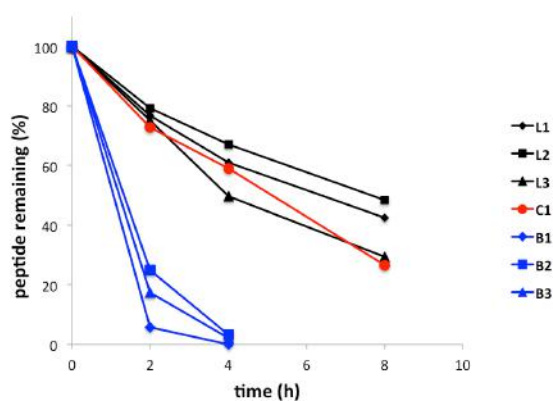

Fig. S189. Plots of time vs conversion (proteinase K assay)

## 18. Serum stability assay

### 18.1. Synthesis of linear peptide R1

#### 18.1.1. Linear peptide $\alpha$ -ketoacid **S73**

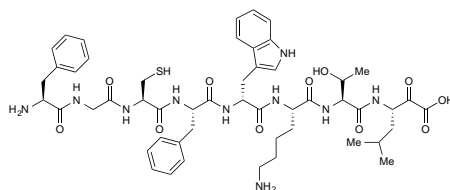

**S73**

Linear peptide  $\alpha$ -ketoacid **S73** was prepared using the protected leucine  $\alpha$ -ketoacid resin **S1** on a 0.24 mmol scale (1.4 g) with a substitution capacity of 0.17 mmol/g. After the full assembly of amino acids, a half of the resin was transferred to another fritted syringe, and Fmoc deprotection was performed with 20% piperidine in DMF (7 min x 2). The resin was treated with (95:2.5:2.5) TFA:DODT:H<sub>2</sub>O for 1 h and removed by filtration. The volatiles were evaporated from the filtrate under reduced pressure. The residue was triturated with Et<sub>2</sub>O and centrifuged to obtain the crude **S73**. Purification of crude **S73** was performed by preparative HPLC using YMC C18 column (20 x 250 mm) with a gradient of 20 to 95% CH<sub>3</sub>CN with 0.1% TFA in 28 min. The pure product fractions were pooled and lyophilized to obtain 25.2 mg of **S73** (20% yield for peptide synthesis, resin cleavage and purification steps). Analytical HPLC and HRMS were used to confirm the purity and exact mass of the product.

**HRMS** (MALDI) calcd for C<sub>51</sub>H<sub>69</sub>N<sub>10</sub>O<sub>11</sub>S [M+H]<sup>+</sup>: 1029.4863, found: 1029.4863.

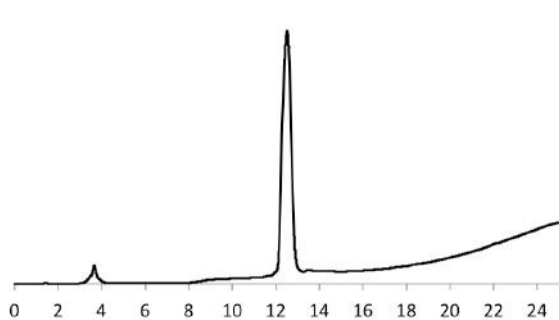

**Fig. S190.** Analytical HPLC of purified **S73**

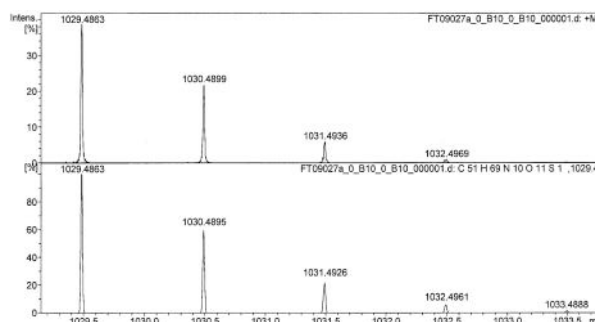

**Fig. S191.** HRMS (MALDI) of measured (top) and calculated (bottom) isotopic pattern of **S73**

#### 18.1.2. Linear peptide R1

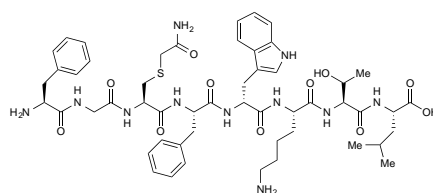

**R1**

To a solution of **S73** (11 mg, 10  $\mu$ mol, 1.0 equiv) in 0.1 M sodium phosphate buffer (pH



7.4)/CH<sub>3</sub>CN (1:1, 0.79 mL) was added a solution of iodoacetamide (2.1 mg, 11 μmol, 1.1 equiv) in 0.1 M sodium phosphate buffer (pH 7.4)/CH<sub>3</sub>CN (1:1, 0.21 mL). The mixture was incubated at RT for 30 min, and 30% H<sub>2</sub>O<sub>2</sub> in H<sub>2</sub>O (0.82 mL) was added. The mixture was further incubated at RT for 5 min and immediately purified by preparative HPLC using YMC C18 column (20 x 250 mm) with a gradient of 20 to 95% CH<sub>3</sub>CN with 0.1% TFA in 28 min. The pure product fractions were pooled and lyophilized to obtain 5.3 mg of **R1** (49% yield). Analytical HPLC and HRMS were used to confirm the purity and exact mass of the product.

**HRMS** (MALDI) calcd for C<sub>52</sub>H<sub>71</sub>N<sub>11</sub>NaO<sub>11</sub>S [M+Na]<sup>+</sup>: 1080.4947, found: 1080.4946.

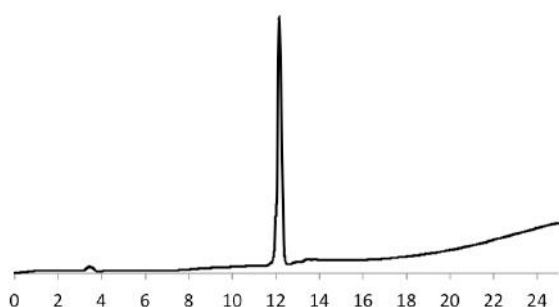

**Fig. S192.** Analytical HPLC of purified **R1**

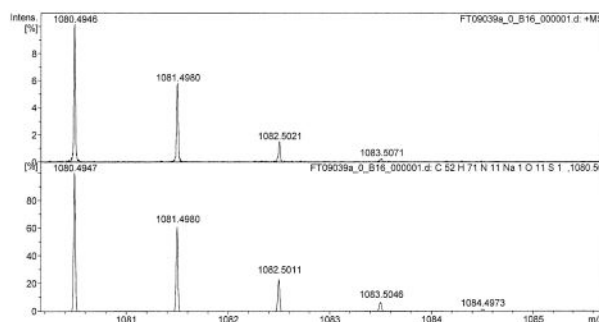

**Fig. S193.** HRMS (MALDI) of measured (top) and calculated (bottom) isotopic pattern of **R1**

## 18.2. Procedure for serum stability assay<sup>14</sup>

Serum stability was studied using male human serum type AB (Sigma). A 10 mM peptide solution (2.7 μL) was added to serum (132 μL) and incubated at 37 °C and analyzed at selected time points: 0 min, 2, 4, 8, and 24 h for all the peptides except linear peptide **R1**; 0 min, 2, 4, and 8 h for linear peptide **R1**. For analysis, an aliquot (15 μL) was taken from the reaction mixture and poured into cold MeOH (15 μL, pre-cooled in the freezer) to precipitate the serum proteins. The mixture was centrifuged, and an aliquot (7.5 μL) was taken from the supernatant and injected to analytical RP-HPLC. The peak area of the starting peptide was used to calculate percentage of the remaining peptide relative to the initial peptide sample (t = 0 min). Experiments were conducted in duplicate.

### 18.3. Plots of time vs conversion

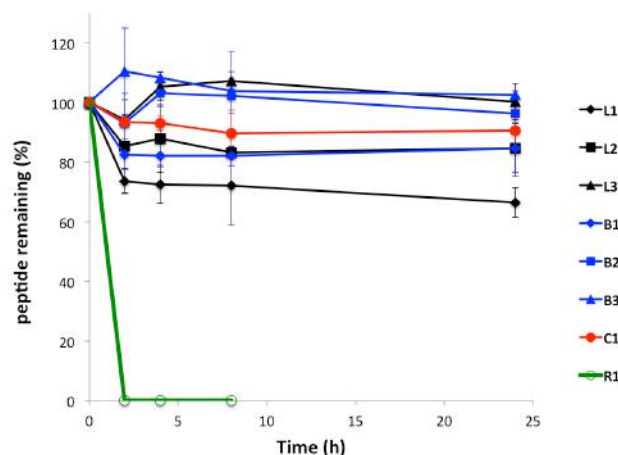

Fig. S194. Plots of time vs conversion (serum assay)

### 19. References

- [1] Dumas, A. M.; Bode, J. W. *Org. Lett.* **2012**, *14*, 2138.
- [2] Wucherpennig, T. G.; Pattabiraman, V. R.; Limberg, F. R. P.; Ruiz-Rodríguez, J.; Bode, J. W. *Angew. Chem. Int. Ed.* **2014**, *53*, 12248.
- [3] Noda, H.; Erős, G.; Bode, J. W. *J. Am. Chem. Soc.* **2014**, *136*, 5611.
- [4] Zhang, C.; Li, S.; Zhang, J.; Zhu, K.; Li, N.; Huang, F. *Org. Lett.* **2007**, *9*, 5553.
- [5] Dolomanov, O. V.; Bourhis, L. J.; Gildea, R. J.; Howard, J. A. K.; Puschmann, H. *J. Appl. Cryst.* **2009**, *42*, 339.
- [6] Sheldrick, G. M. *Acta Cryst.* **2015**, *A71*, 3.
- [7] Sheldrick, G. M. *Acta Cryst.* **2008**, *A64*, 112.
- [8] Sayyadi, N.; Skropeta, D.; Jolliffe, K. A. *Org. Lett.* **2005**, *7*, 5497.
- [9] Mazunin, D.; Broguiere, N.; Zenobi-Wong, M.; Bode, J. W. *ACS Biomater. Sci. Eng.* **2015**, *1*, 456.
- [10] Nemoto, H.; Nishiyama, T.; Akai, S. *Org. Lett.* **2011**, *13*, 2714.
- [11] Kota, R.; Samudrala, R.; Mattern, D. L. *J. Org. Chem.* **2012**, *77*, 9641.
- [12] Ebner, C.; Müller, C. A.; Markert, C.; Pfaltz, A. *J. Am. Chem. Soc.* **2011**, *133*, 4710.
- [13] Mao, H.; Thorne, J. B.; Pharr, J. S.; Gawley, R. E. *Can. J. Chem.* **2006**, *84*, 1273.
- [14] Knappe, T. A.; Manzenrieder, F.; Mas-Moruno, C.; Linne, U.; Sasse, F.; Kessler, H.; Xie, X.; Marahiel, M. A. *Angew. Chem. Int. Ed.* **2011**, *50*, 8714.

## 20. NMR spectra and HRMS data

### Alcohol S2

#### <sup>1</sup>H NMR (400 MHz, CDCl<sub>3</sub>)

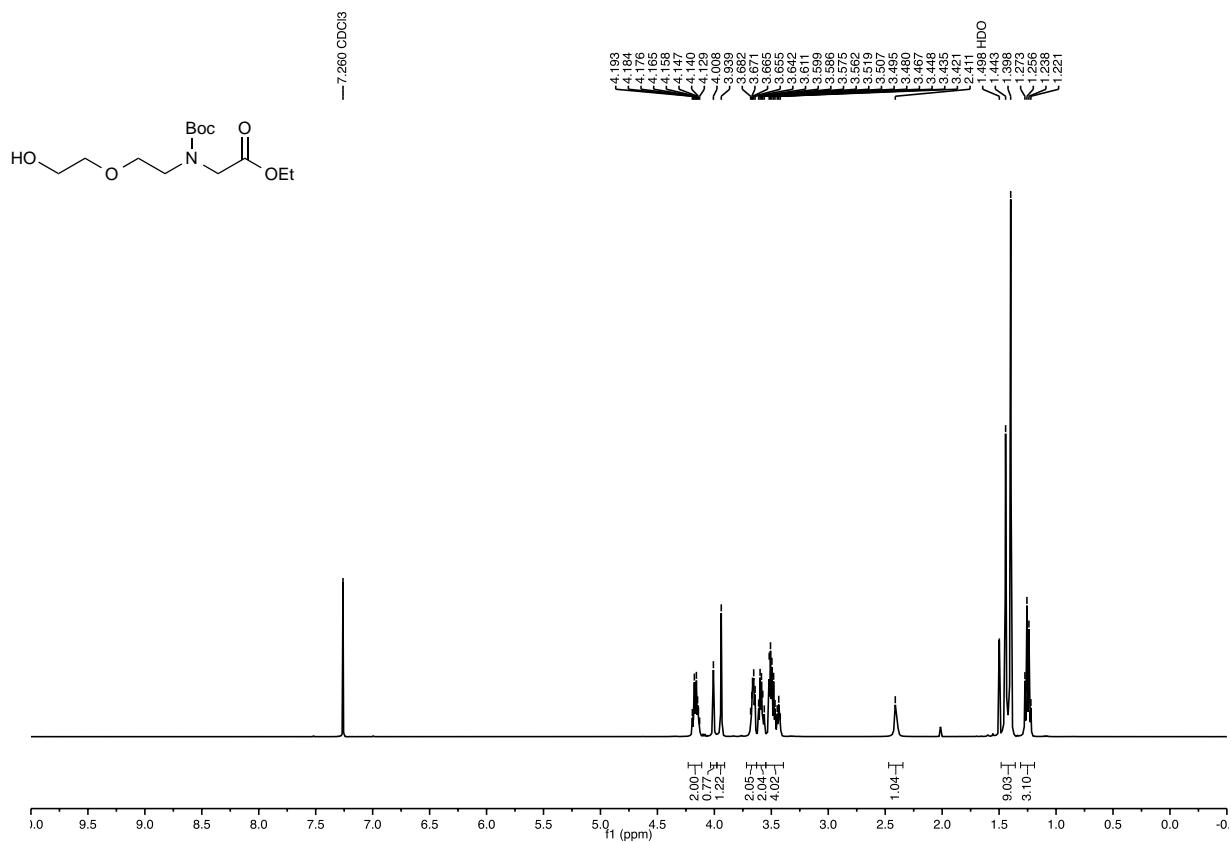

#### <sup>13</sup>C NMR (100 MHz, CDCl<sub>3</sub>)

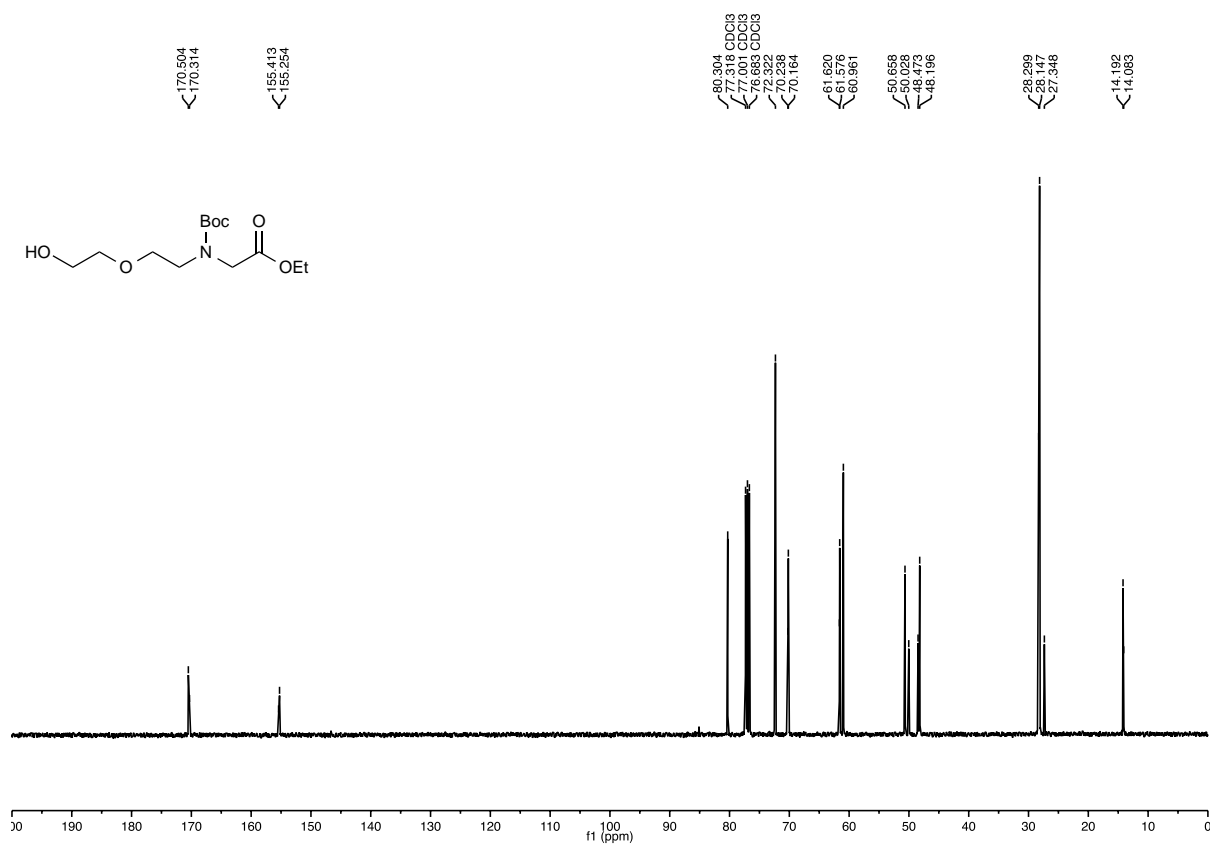

## Tosylate S3

 $^1\text{H}$  NMR (400 MHz,  $\text{CDCl}_3$ )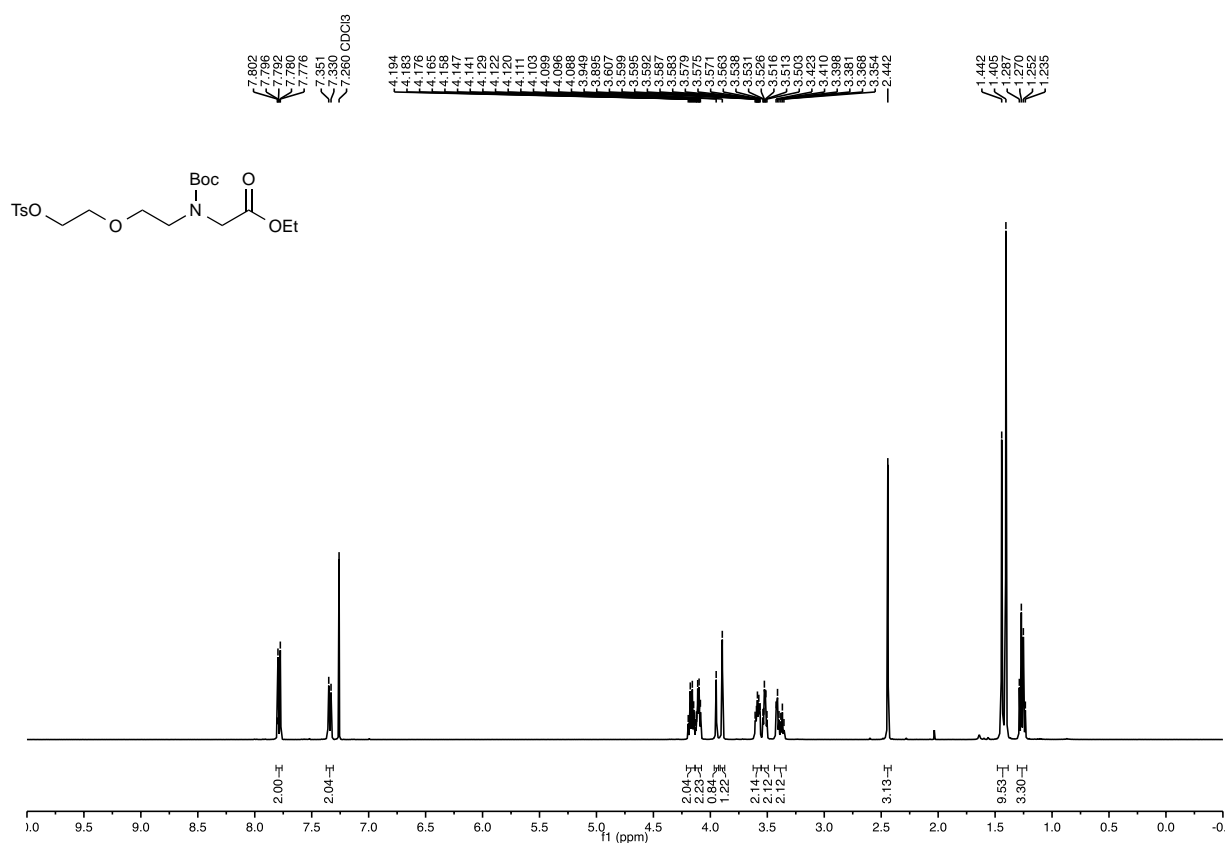 $^{13}\text{C}$  NMR (100 MHz,  $\text{CDCl}_3$ )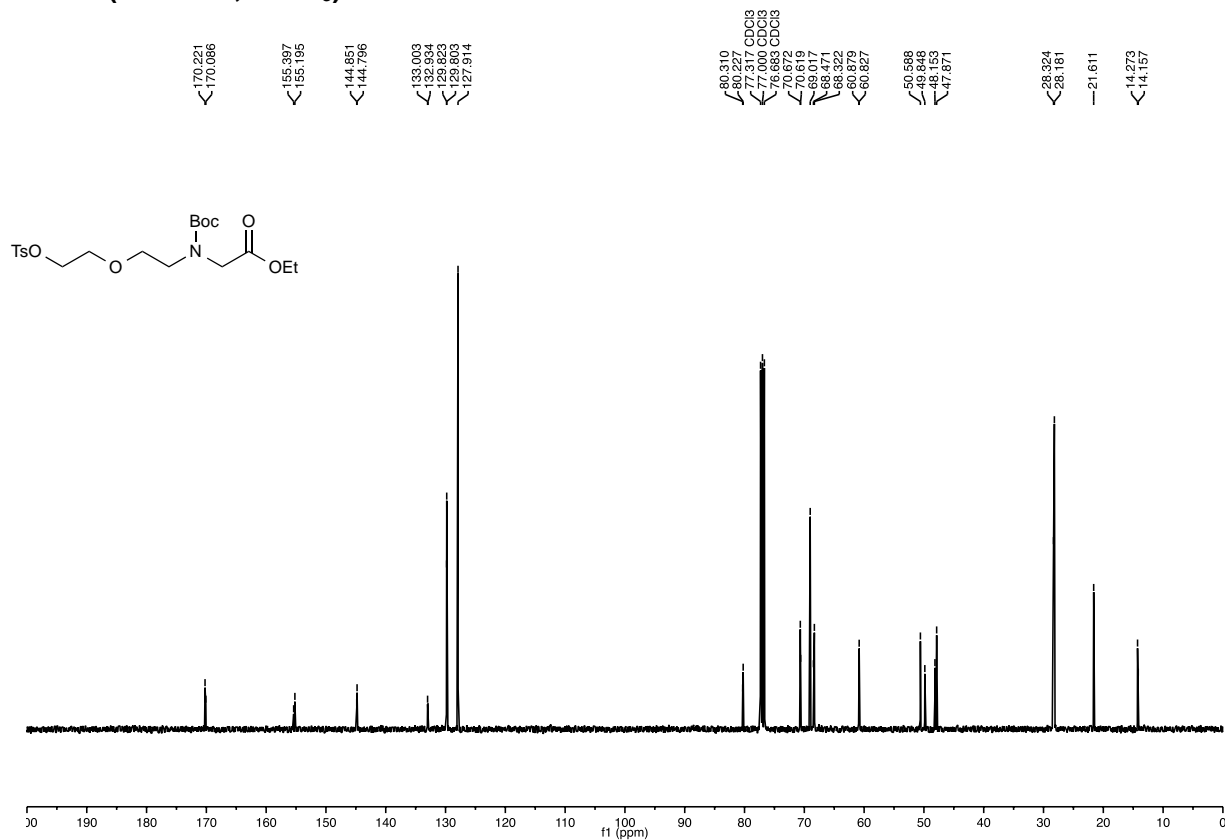

## Azide-ethyl ester S4

 $^1\text{H}$  NMR (400 MHz,  $\text{CDCl}_3$ )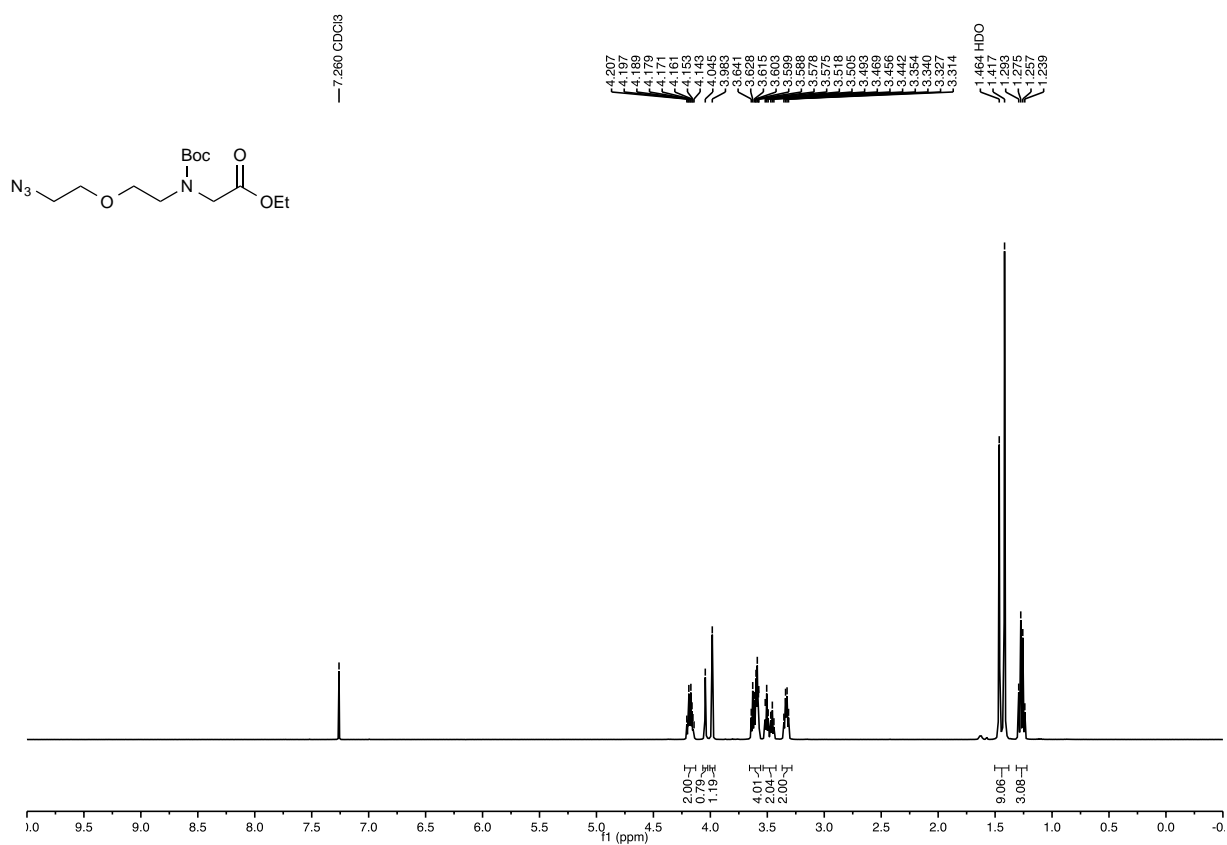 $^{13}\text{C}$  NMR (100 MHz,  $\text{CDCl}_3$ )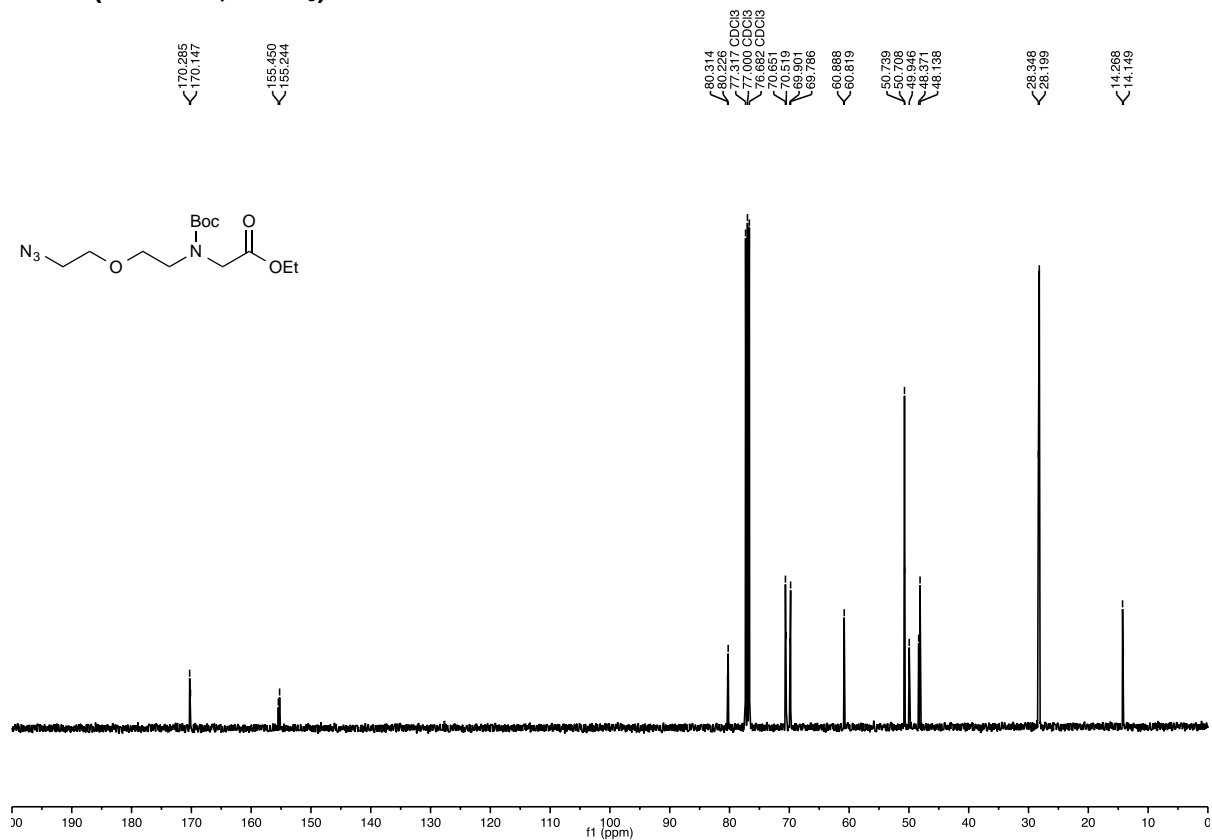

## Azide-acid S5

 $^1\text{H}$  NMR (400 MHz,  $\text{CDCl}_3$ )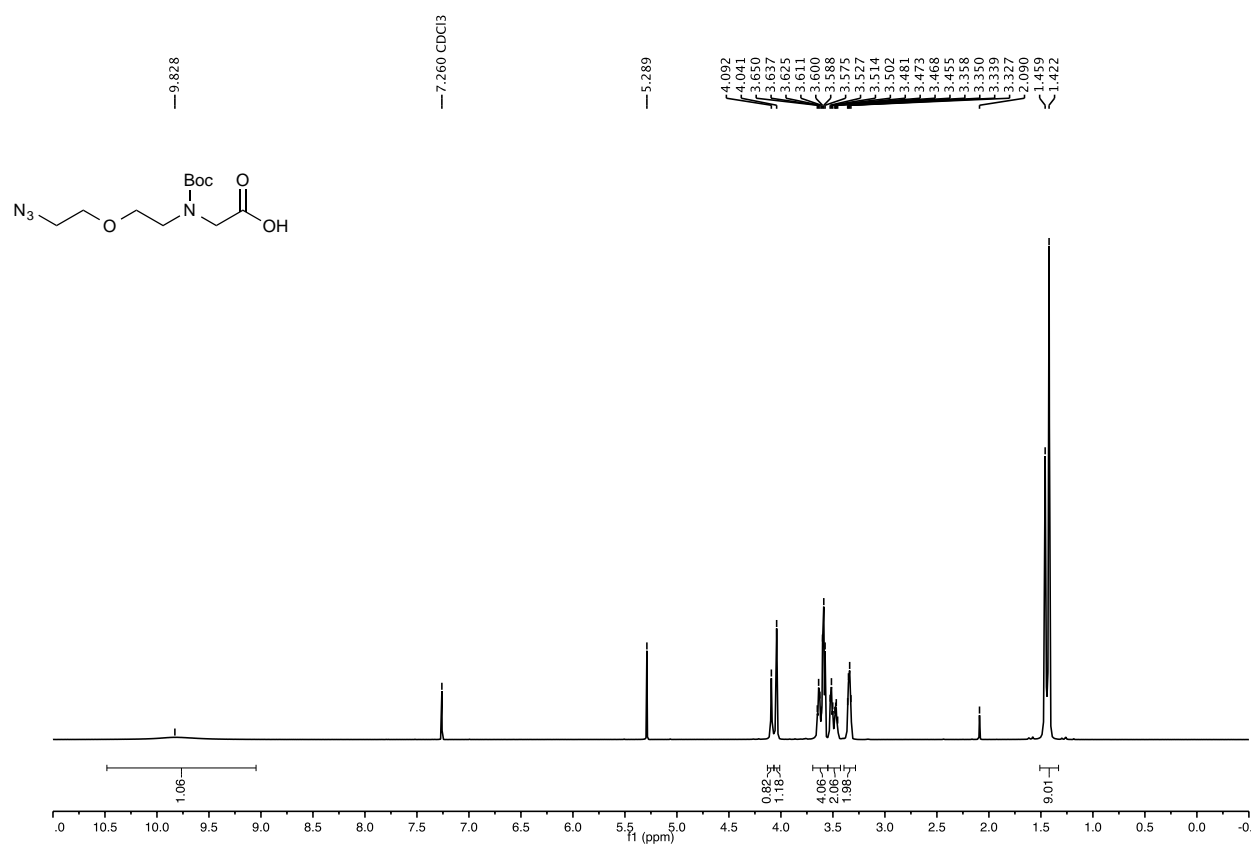 $^{13}\text{C}$  NMR (100 MHz,  $\text{CDCl}_3$ )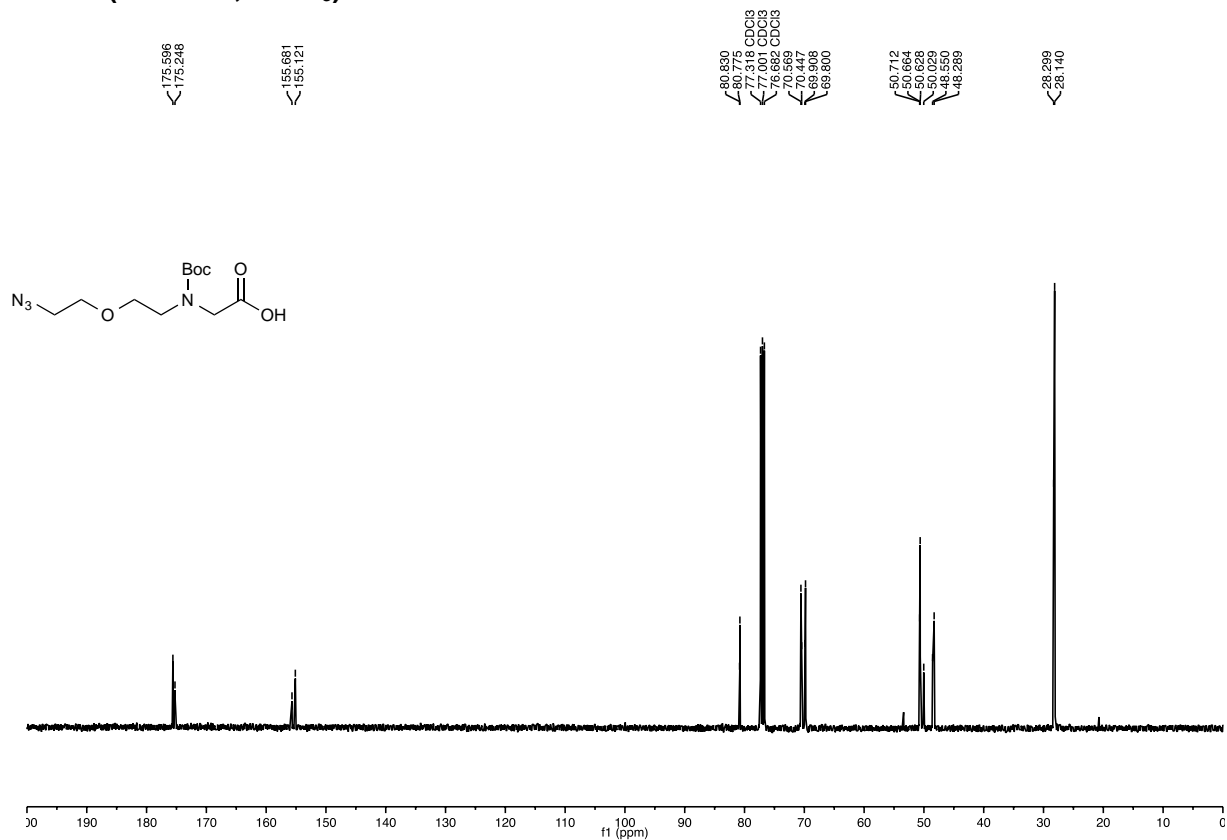

## Azide-Phe methyl ester S6

 $^1\text{H}$  NMR (400 MHz,  $\text{CDCl}_3$ )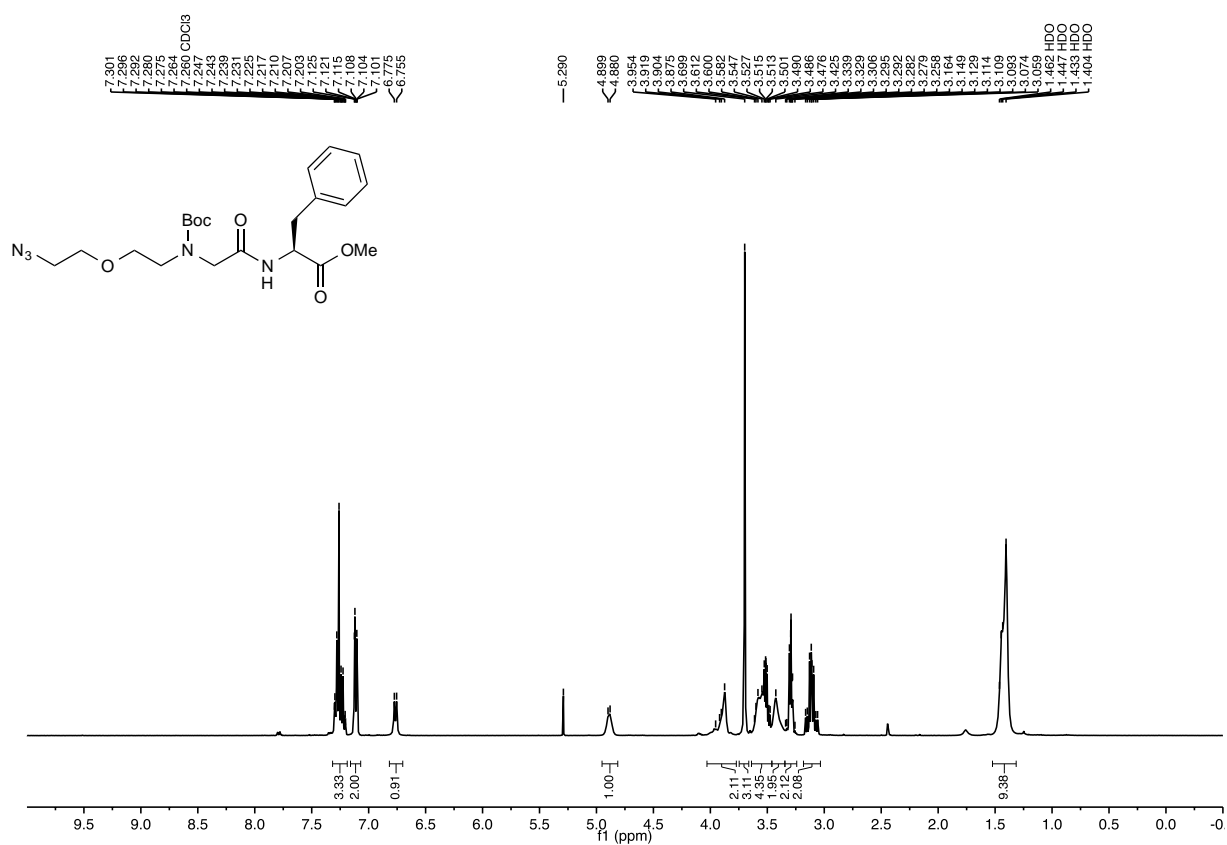 $^{13}\text{C}$  NMR (100 MHz,  $\text{CDCl}_3$ )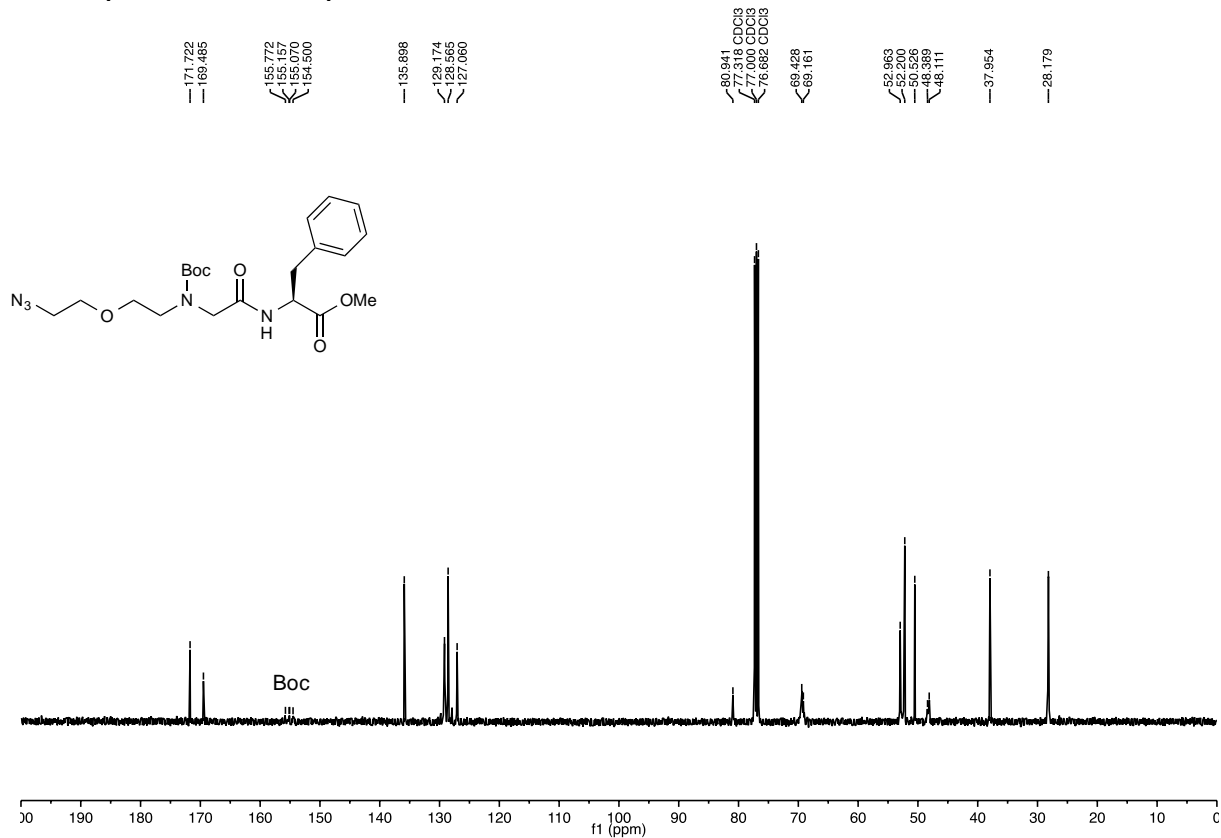

Azide-PF<sub>6</sub> salt S7<sup>1</sup>H NMR (400 MHz, CDCl<sub>3</sub>)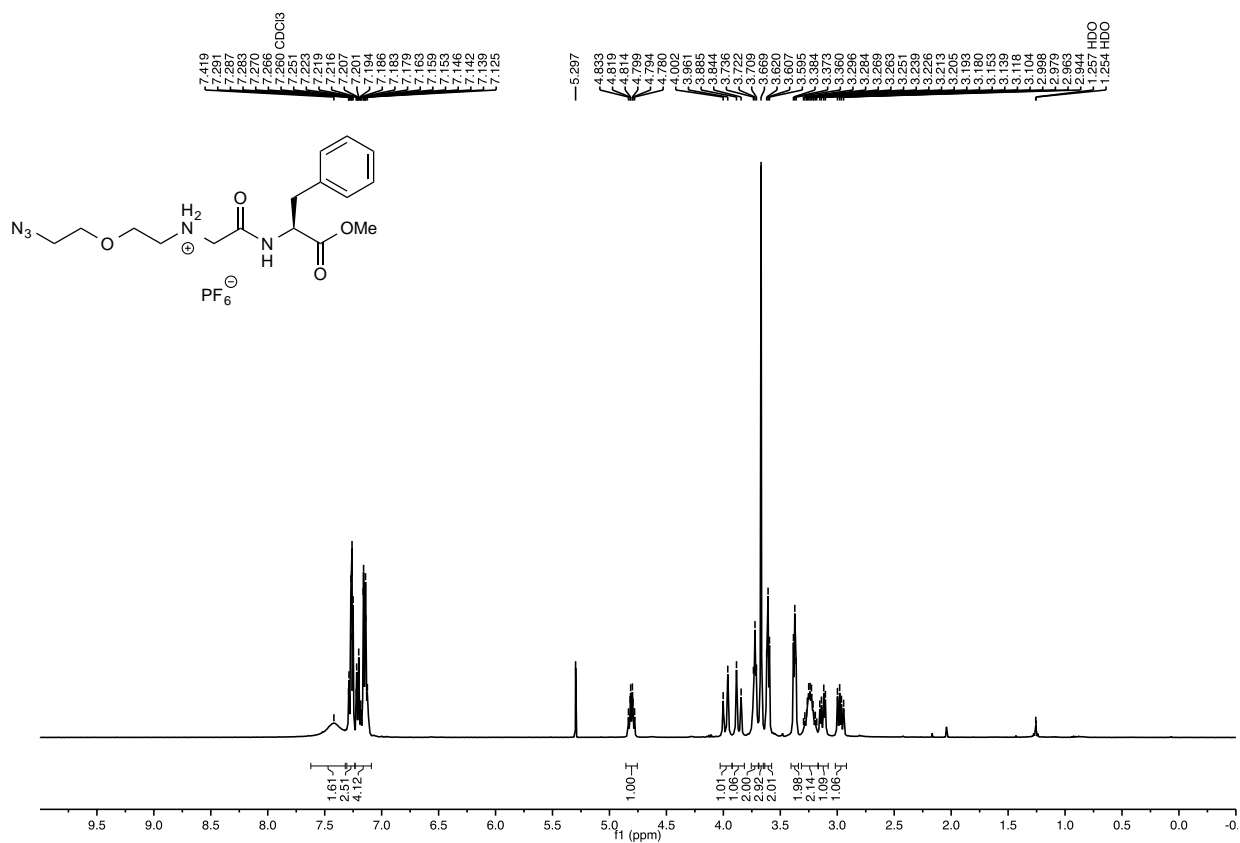<sup>13</sup>C NMR (100 MHz, CDCl<sub>3</sub>)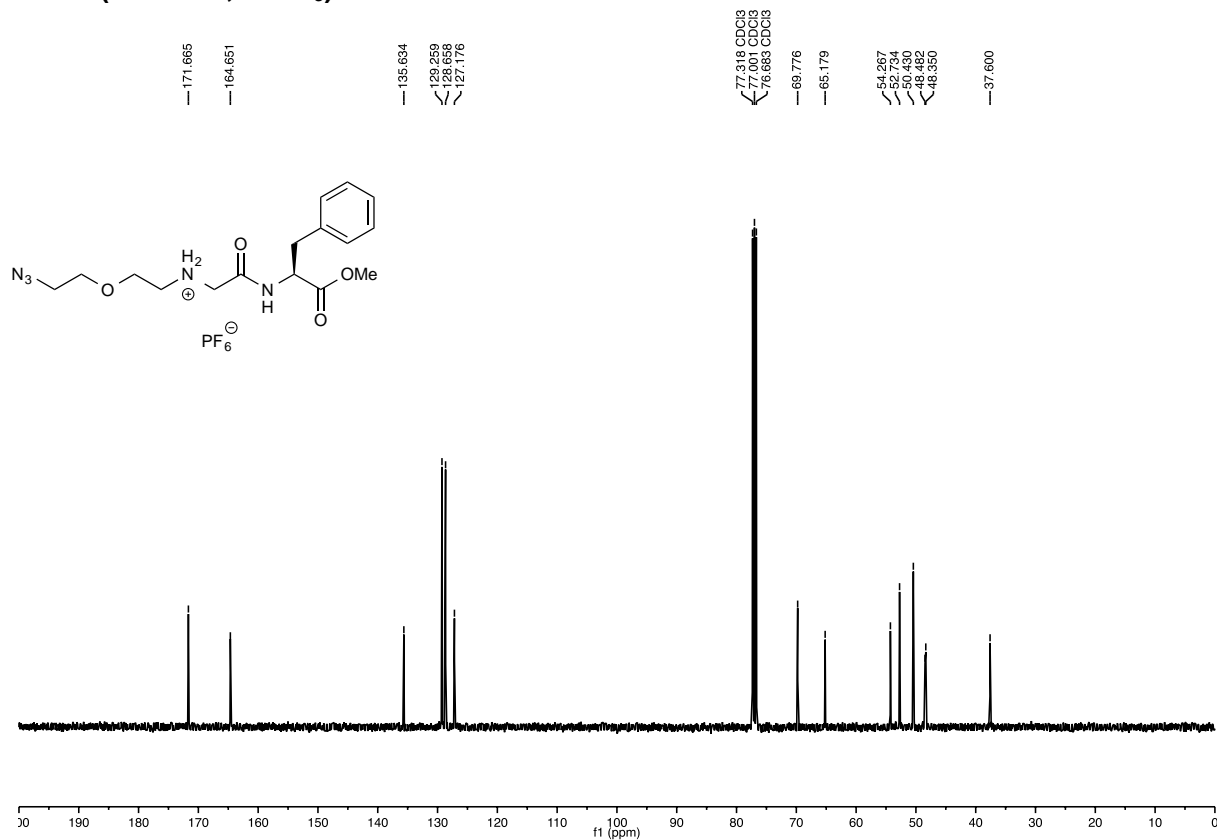



**[2]Rotaxane S9-TFA****<sup>1</sup>H NMR (400 MHz, CDCl<sub>3</sub>)**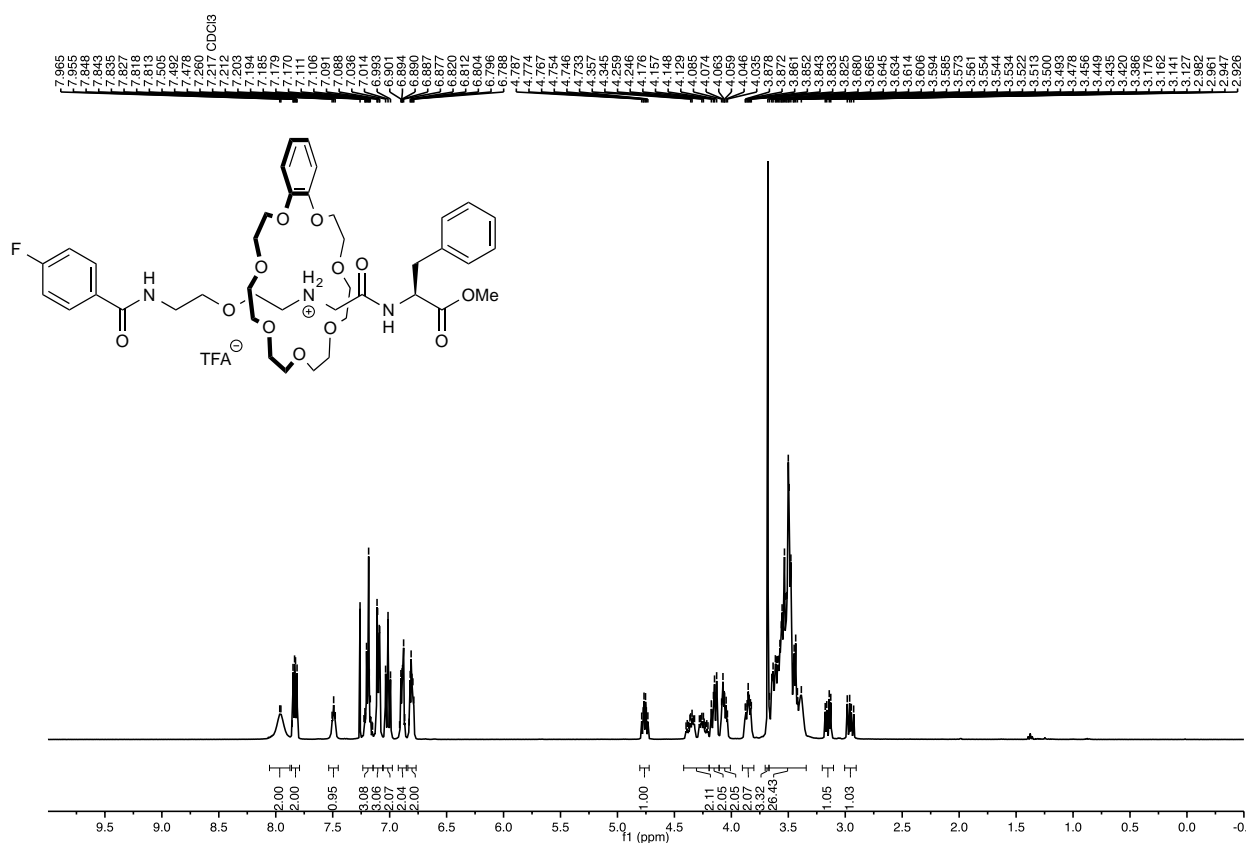**<sup>13</sup>C NMR (100 MHz, CDCl<sub>3</sub>)**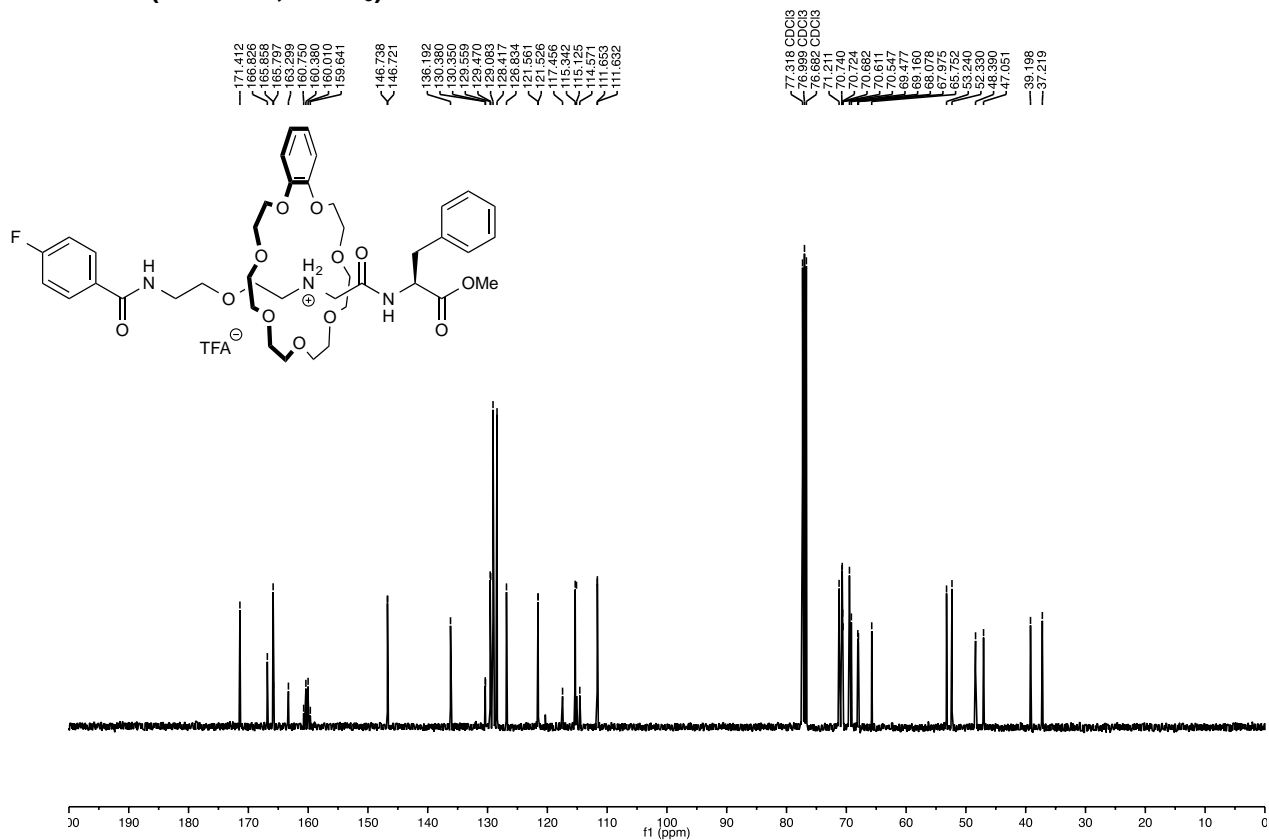

**$^{19}\text{F}$  NMR (376 MHz,  $\text{CDCl}_3$ )**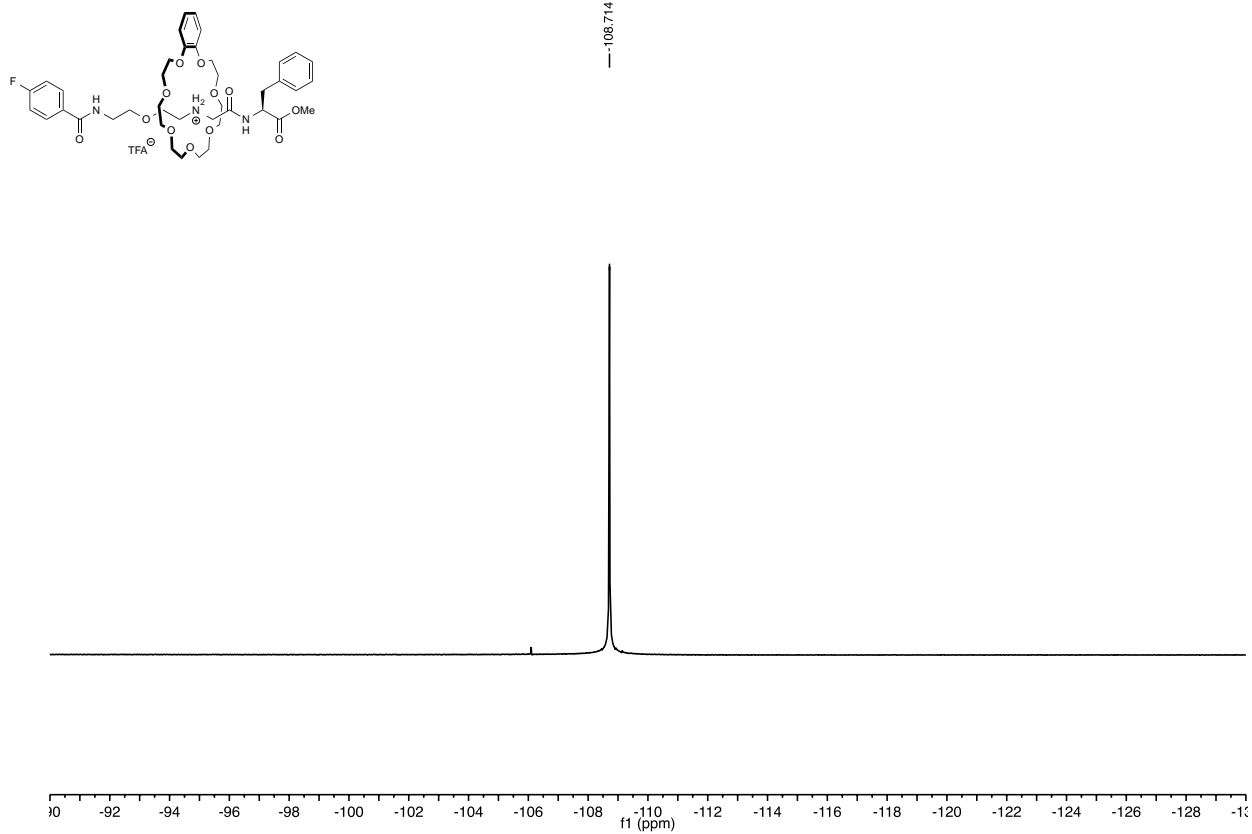

## Azide-Phe-Gly methyl ester S10

<sup>1</sup>H NMR (400 MHz, CDCl<sub>3</sub>)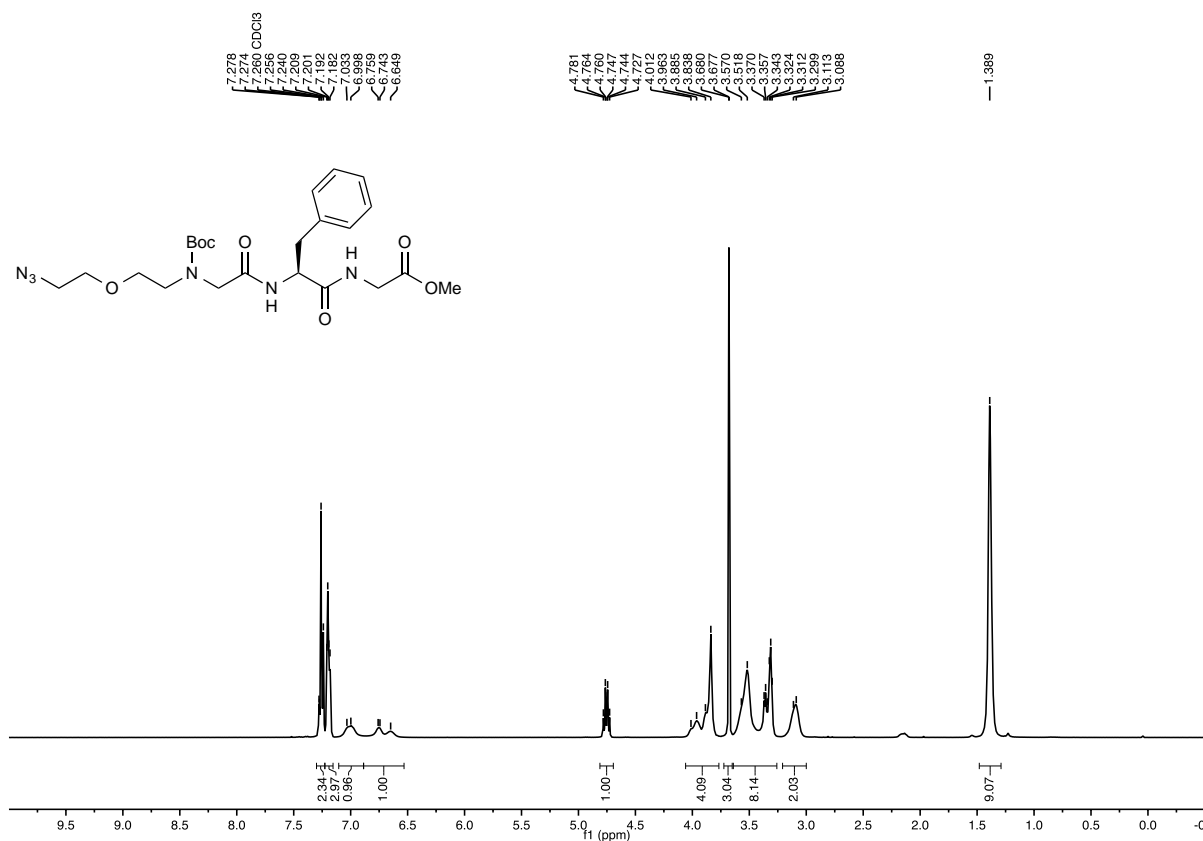<sup>13</sup>C NMR (100 MHz, CDCl<sub>3</sub>)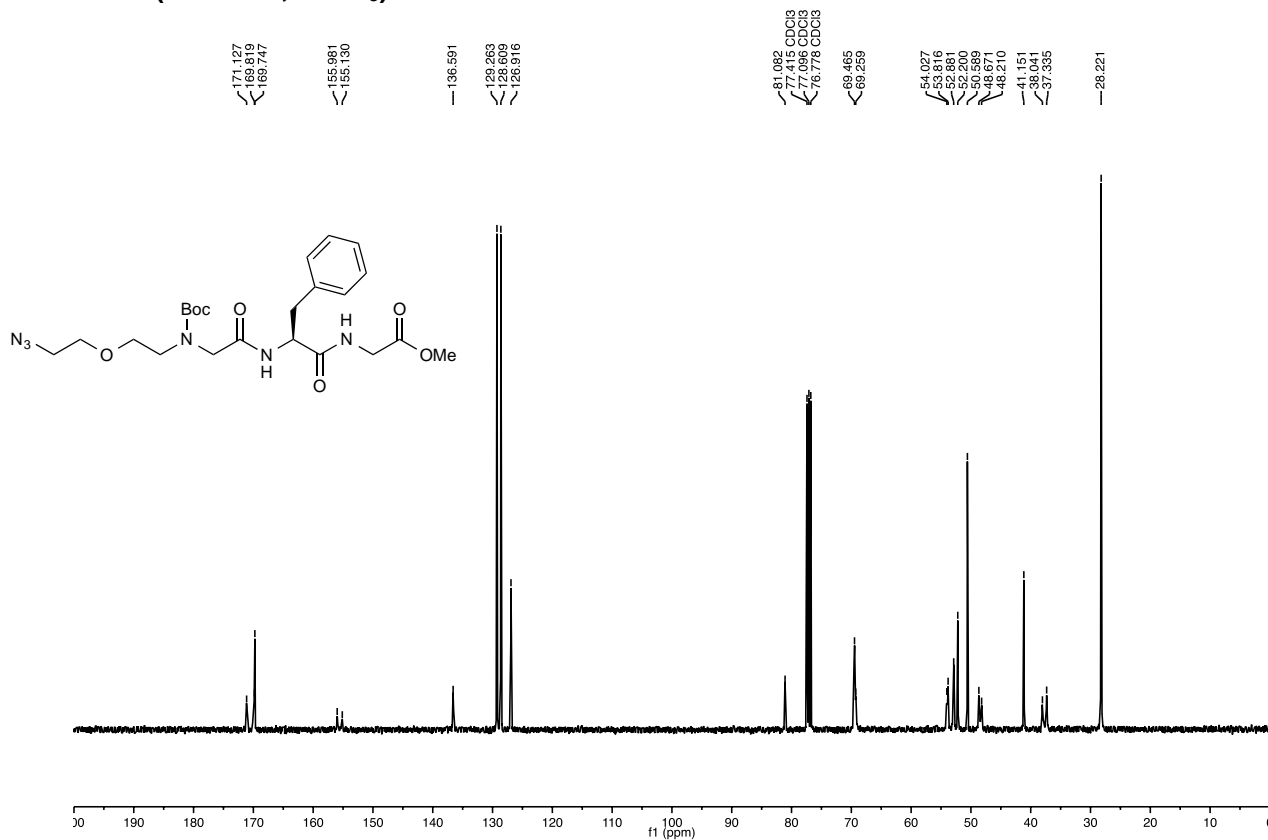

## Azide-Phe-Gly acid S11

 $^1\text{H}$  NMR (400 MHz,  $\text{CD}_3\text{CN}$ )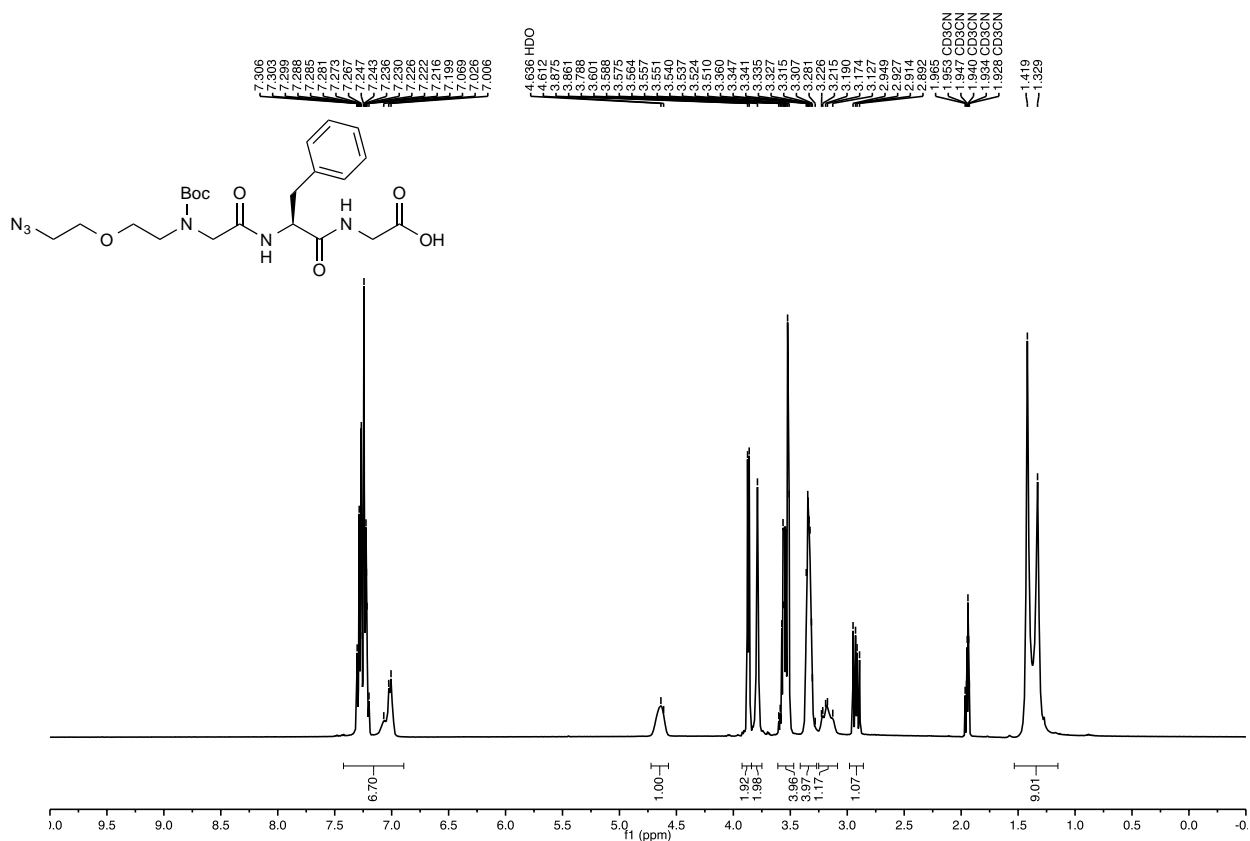 $^{13}\text{C}$  NMR (100 MHz,  $\text{CD}_3\text{CN}$ )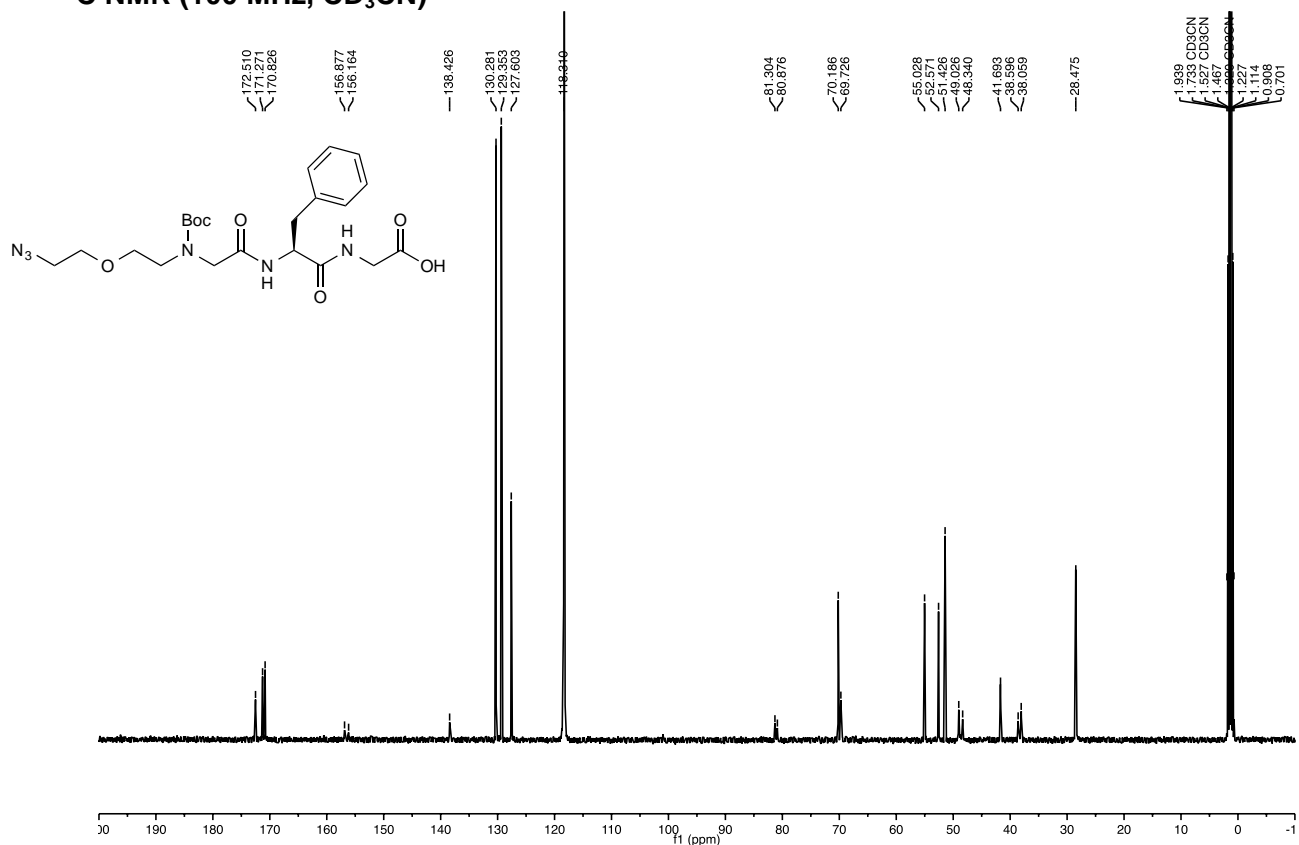

## Azide-Phe-Gly thioester S12

 $^1\text{H}$  NMR (400 MHz,  $\text{CD}_3\text{CN}$ )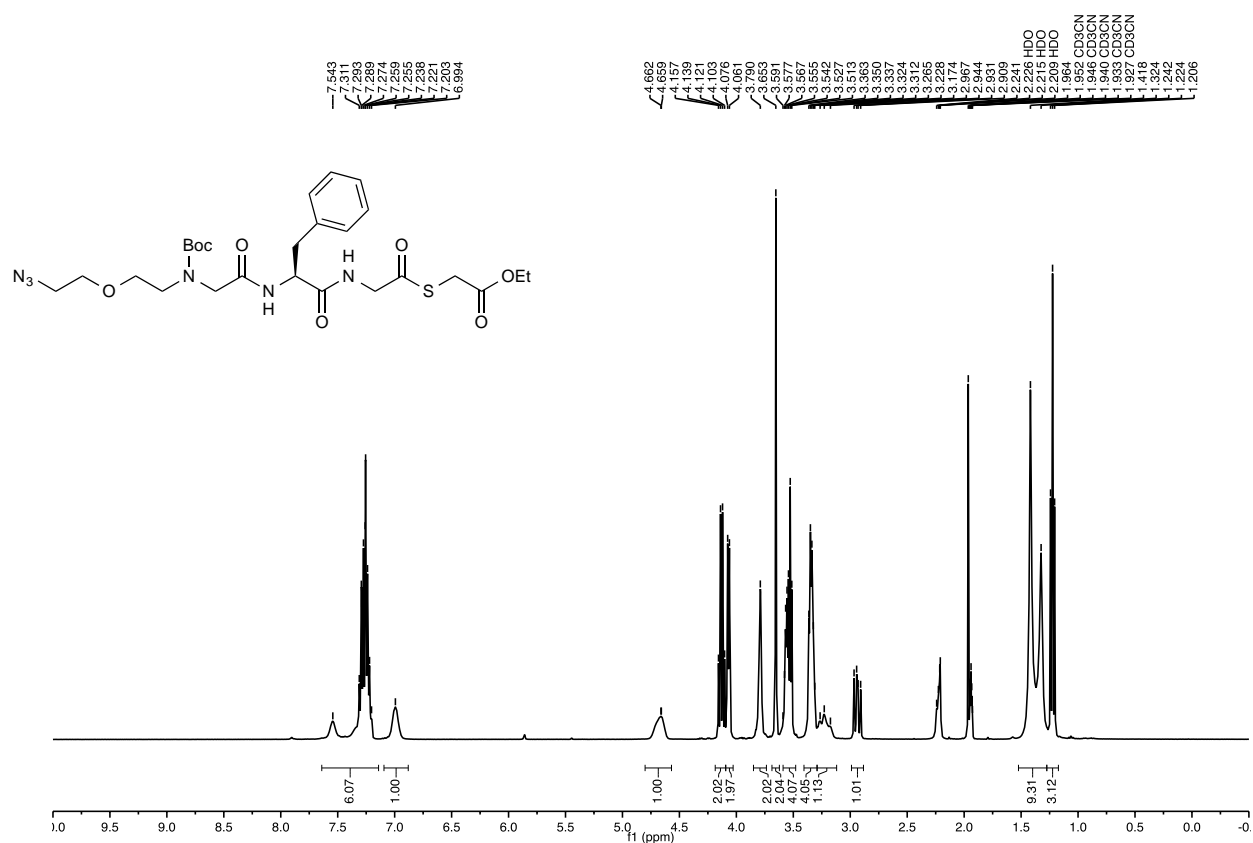 $^{13}\text{C}$  NMR (100 MHz,  $\text{CD}_3\text{CN}$ )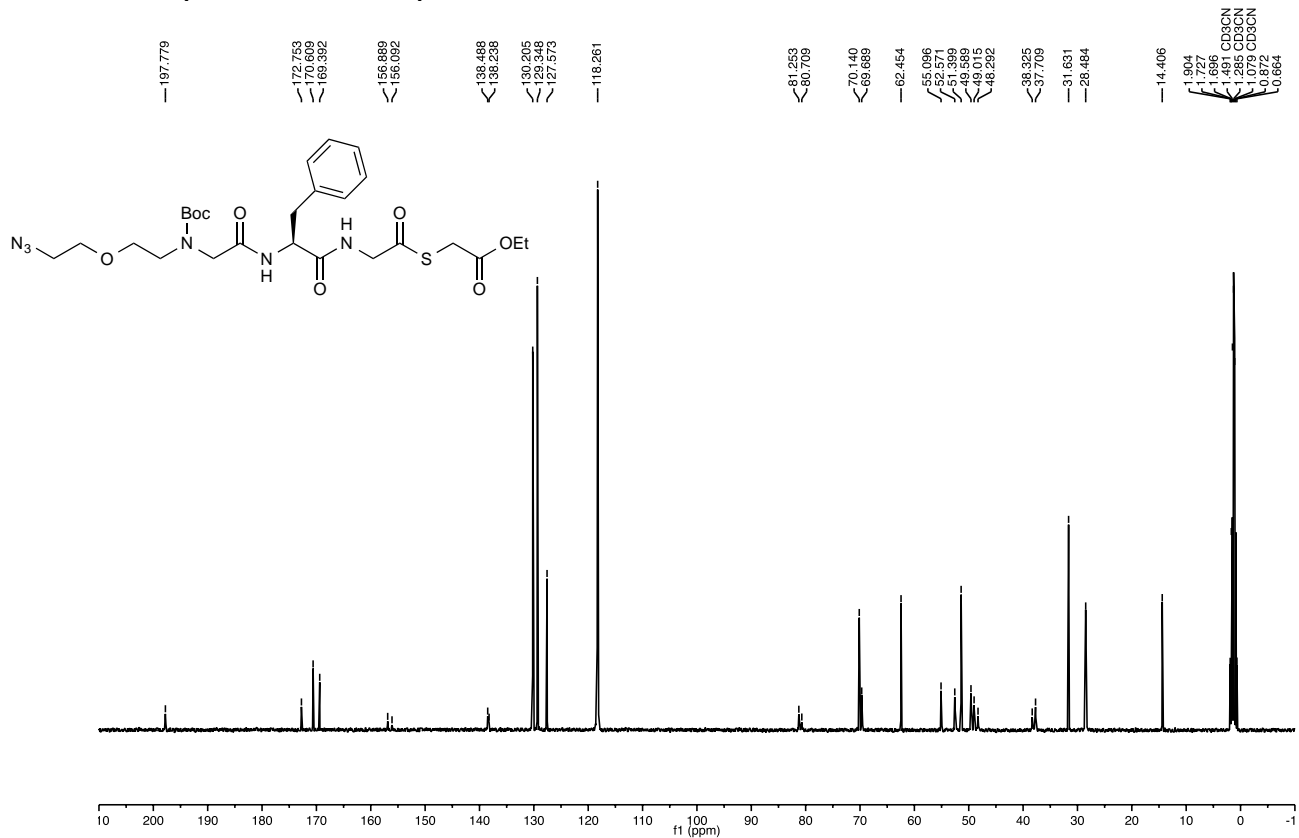

## Azide-Phe-Gly thioester TFA salt 3

<sup>1</sup>H NMR (400 MHz, CDCl<sub>3</sub>)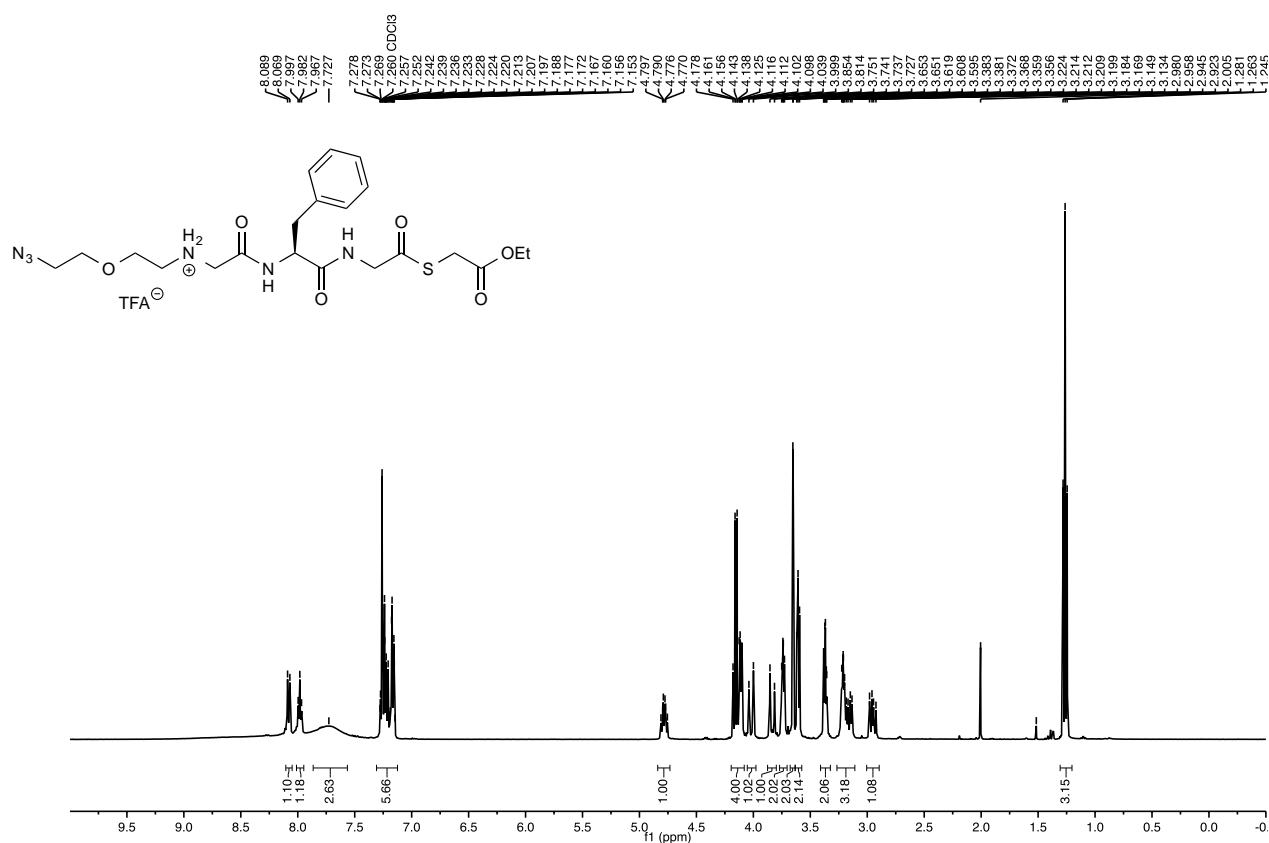<sup>13</sup>C NMR (100 MHz, CDCl<sub>3</sub>)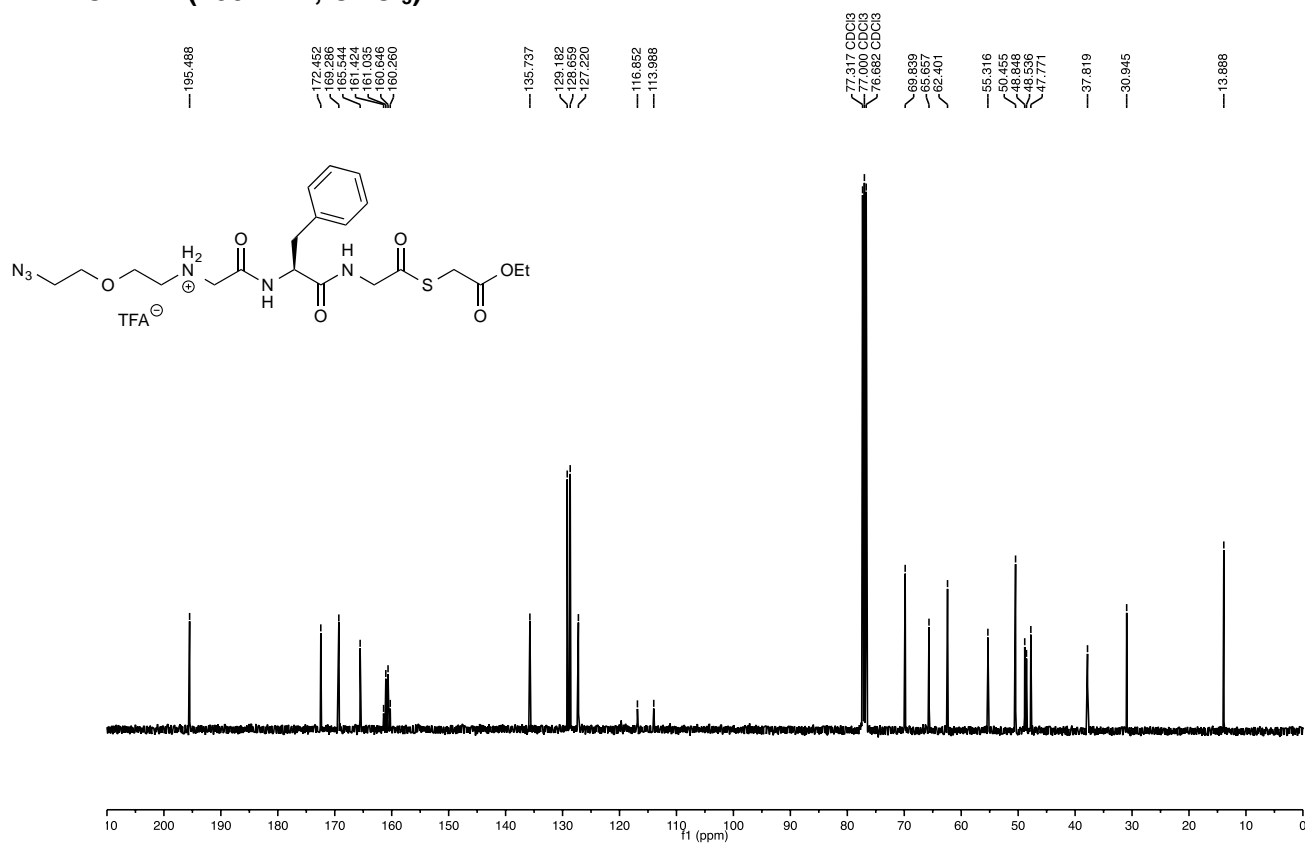

**N-Fmoc hydroxylamine S14****<sup>1</sup>H NMR (400 MHz, CDCl<sub>3</sub>)**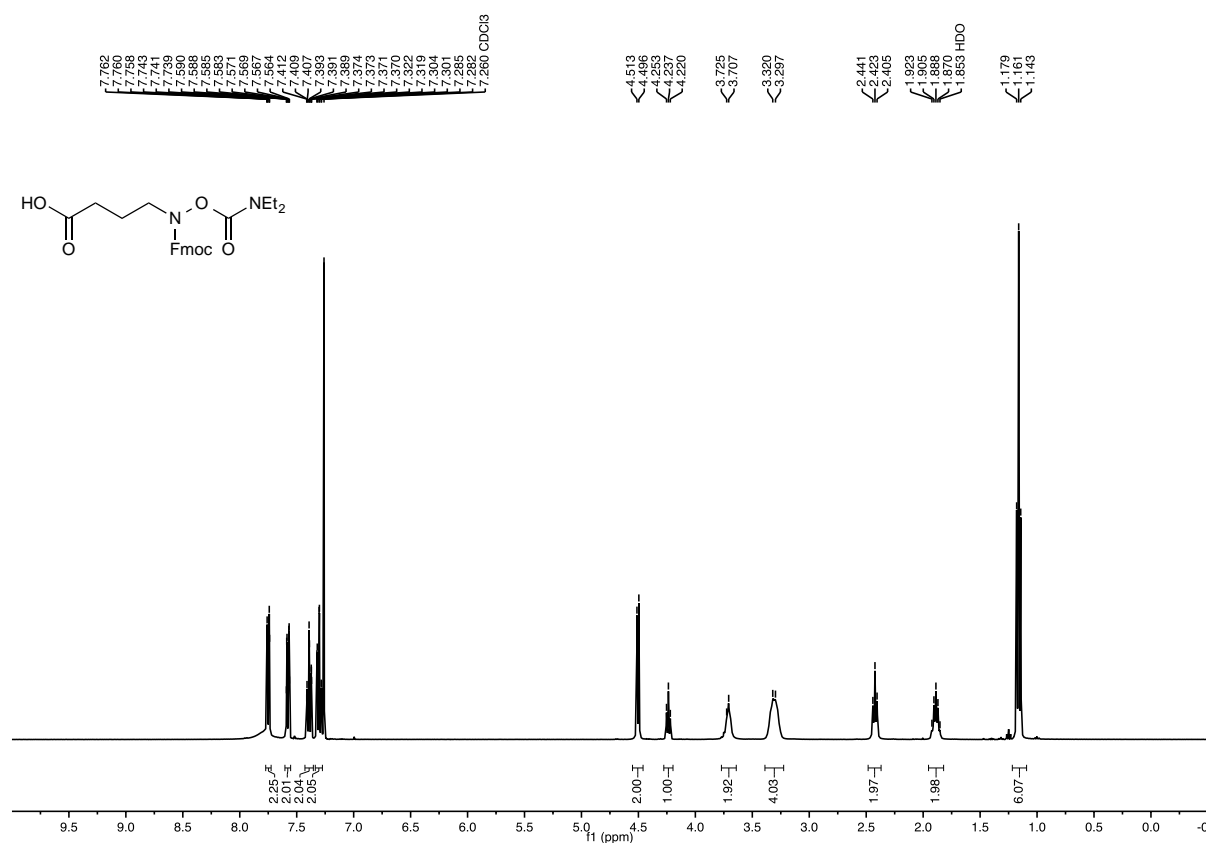**<sup>13</sup>C NMR (100 MHz, CDCl<sub>3</sub>)**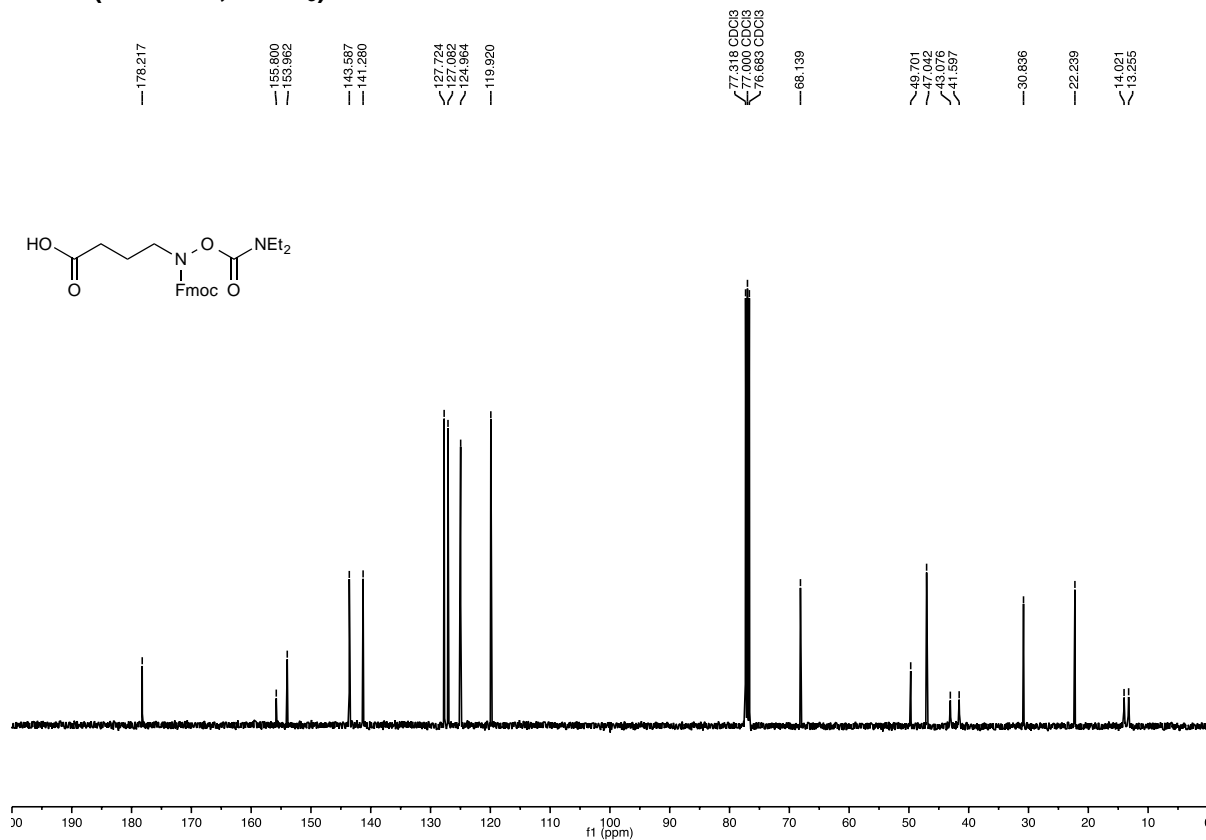

## B21C7-N-Boc amine S17

<sup>1</sup>H NMR (400 MHz, CDCl<sub>3</sub>)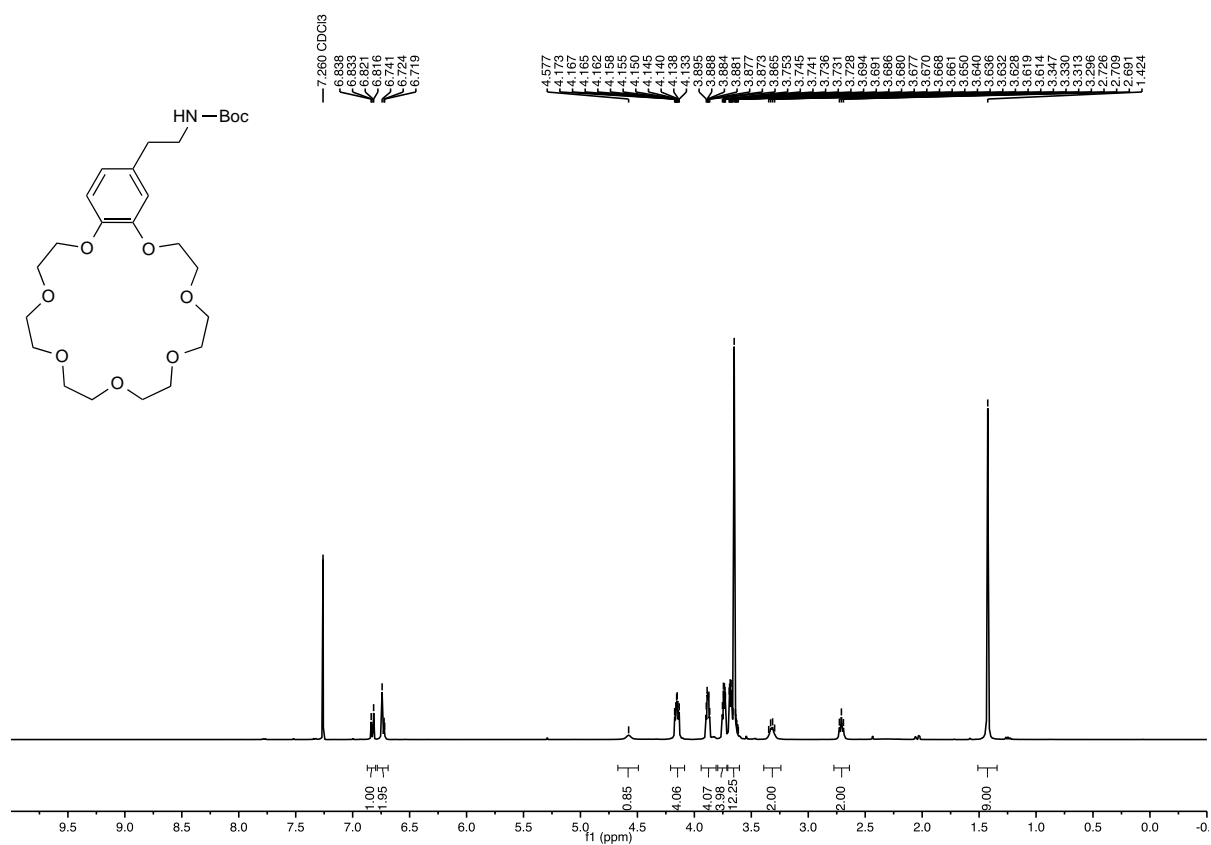<sup>13</sup>C NMR (100 MHz, CDCl<sub>3</sub>)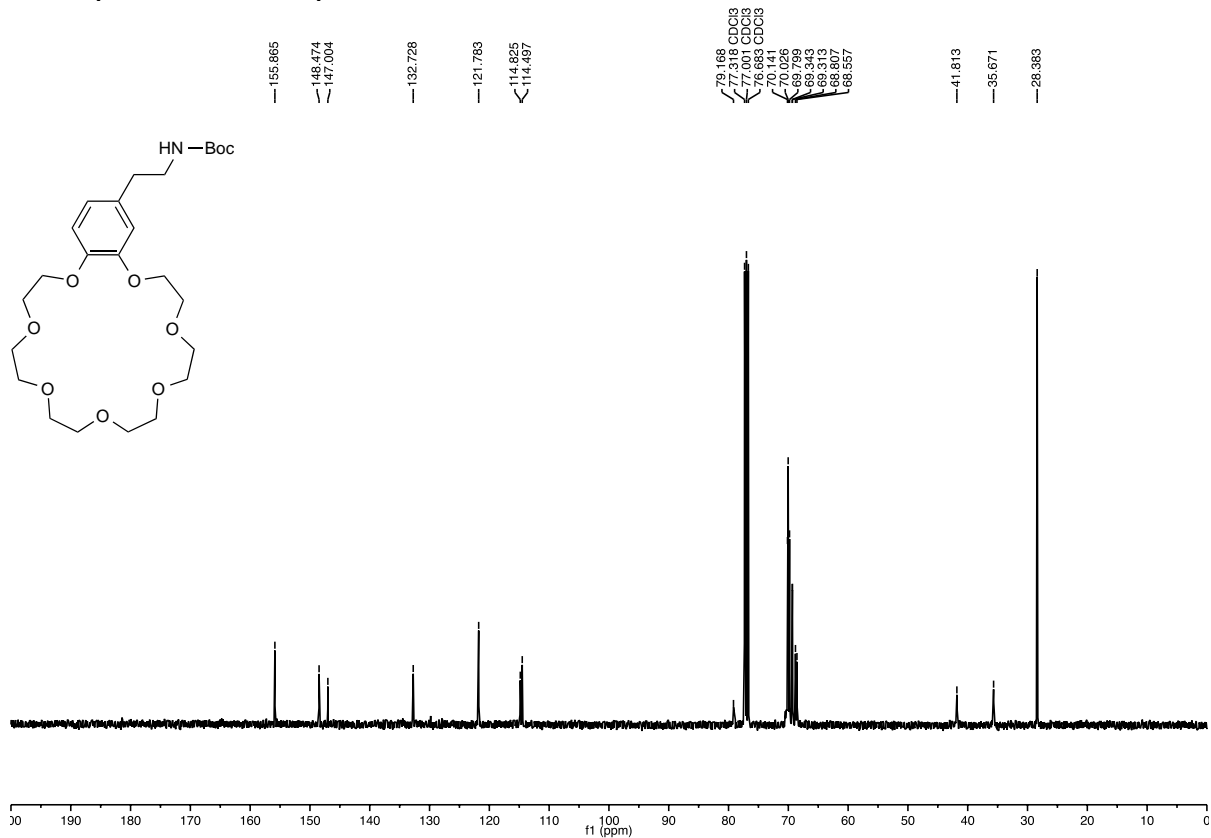



## B21C7-N-Fmoc hydroxylamine 2

 $^1\text{H}$  NMR (400 MHz,  $\text{CDCl}_3$ )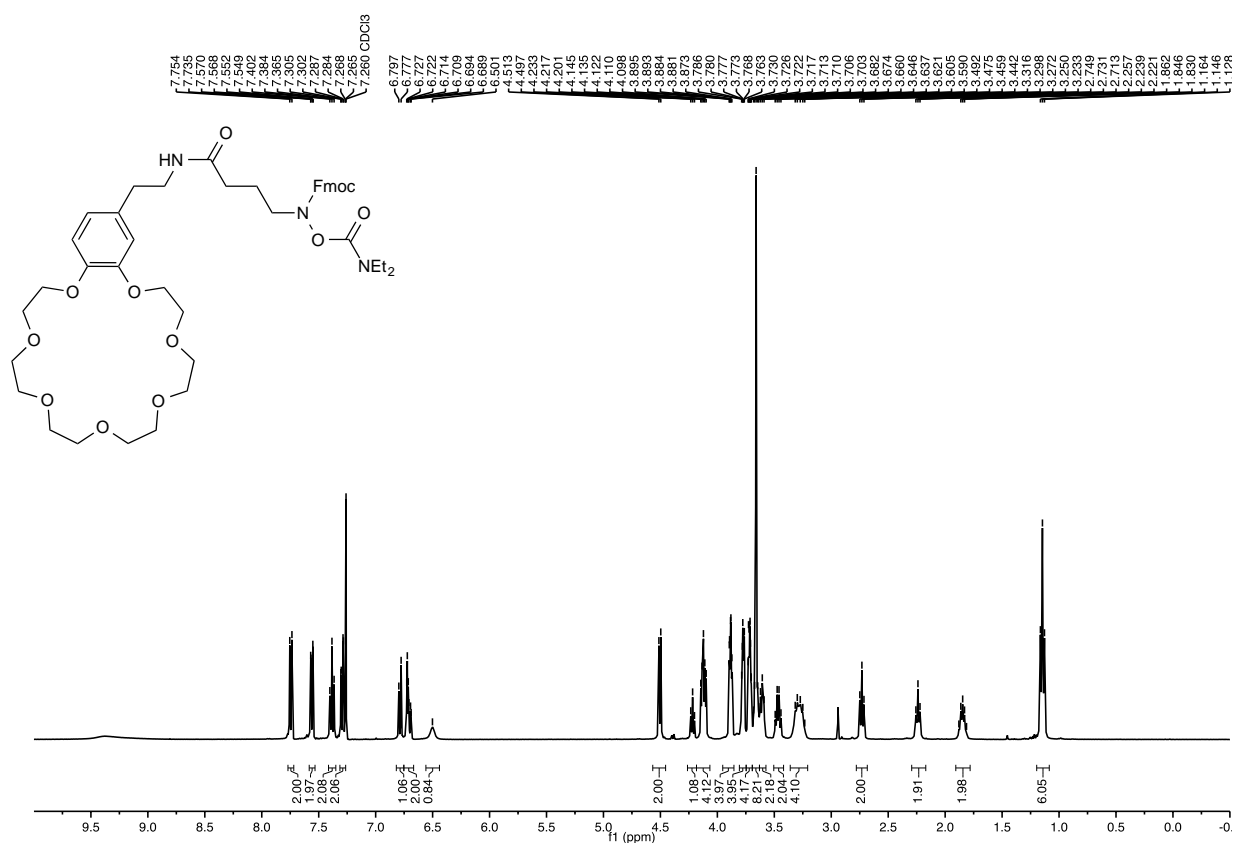 $^{13}\text{C}$  NMR (100 MHz,  $\text{CDCl}_3$ )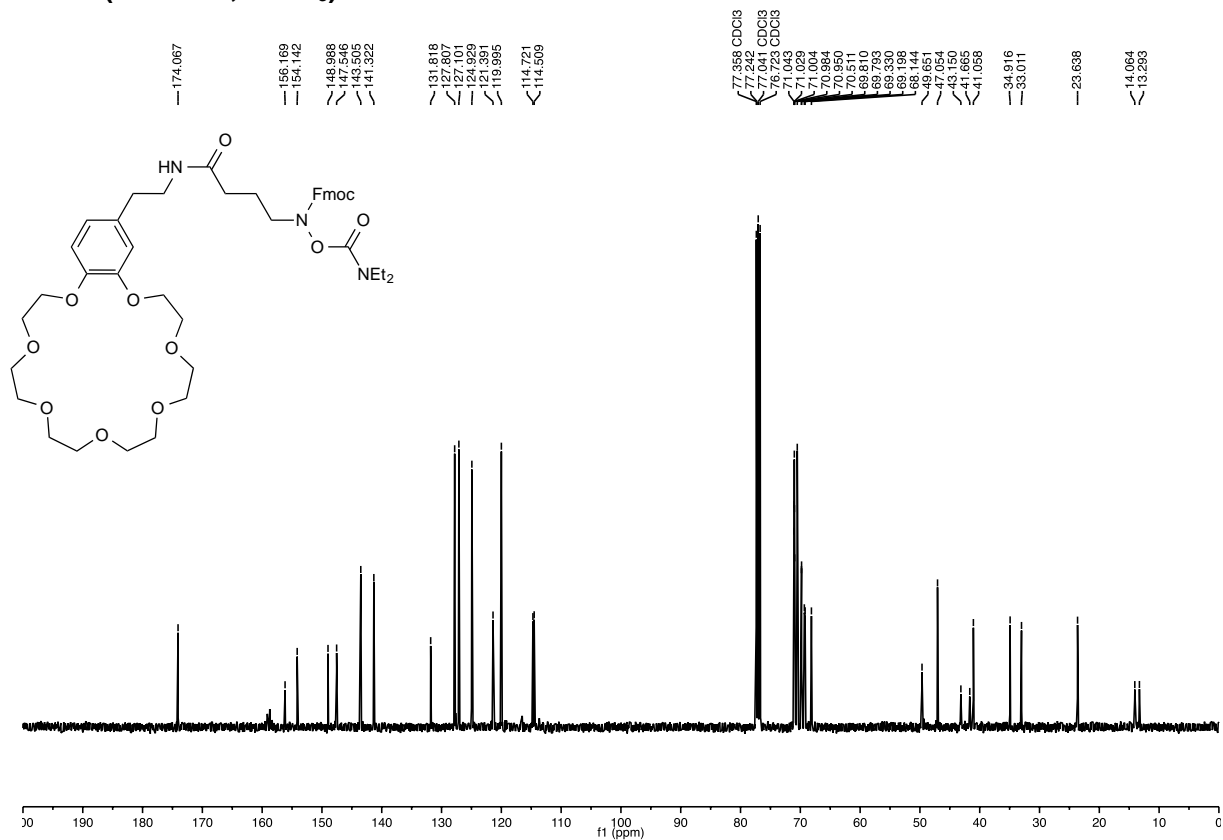

**[2]Rotaxane 4****<sup>1</sup>H NMR (400 MHz, CDCl<sub>3</sub>)**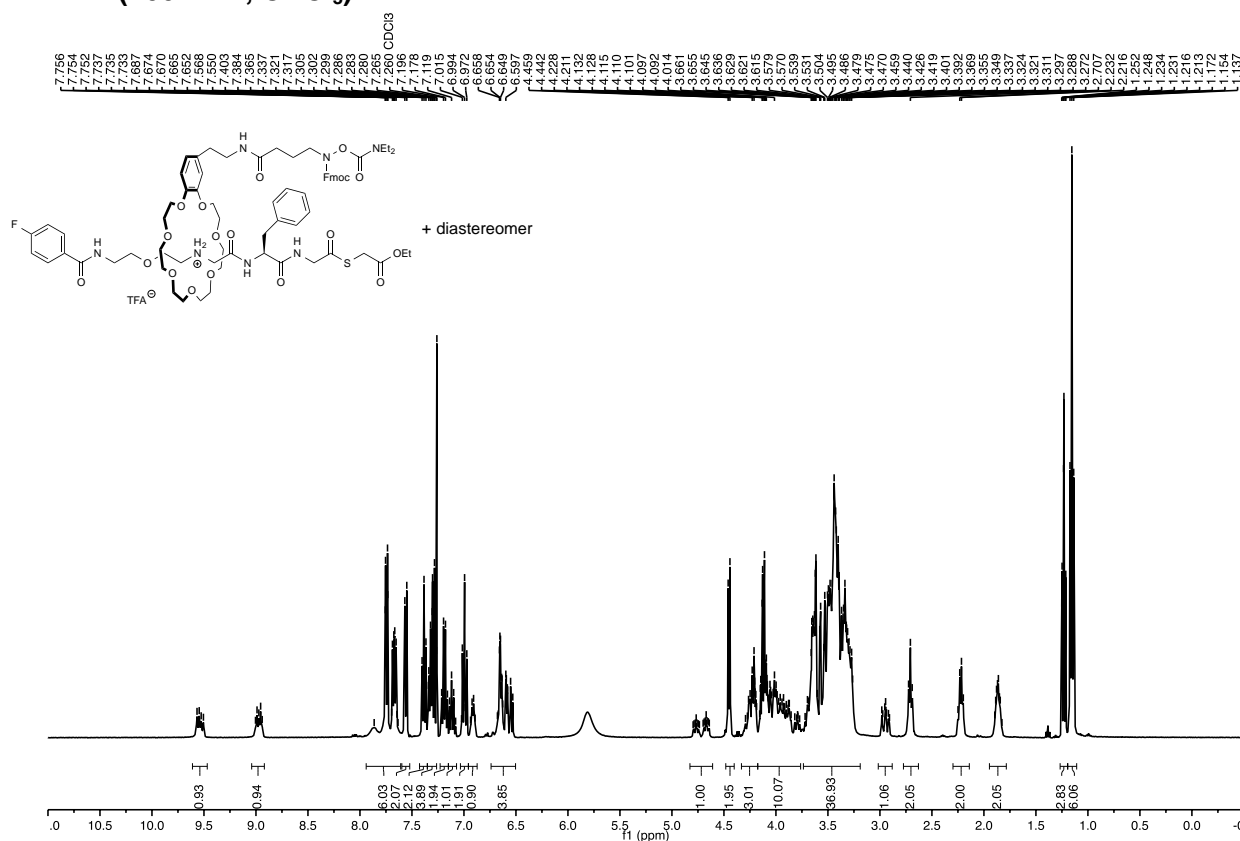**<sup>13</sup>C NMR (100 MHz, CDCl<sub>3</sub>)**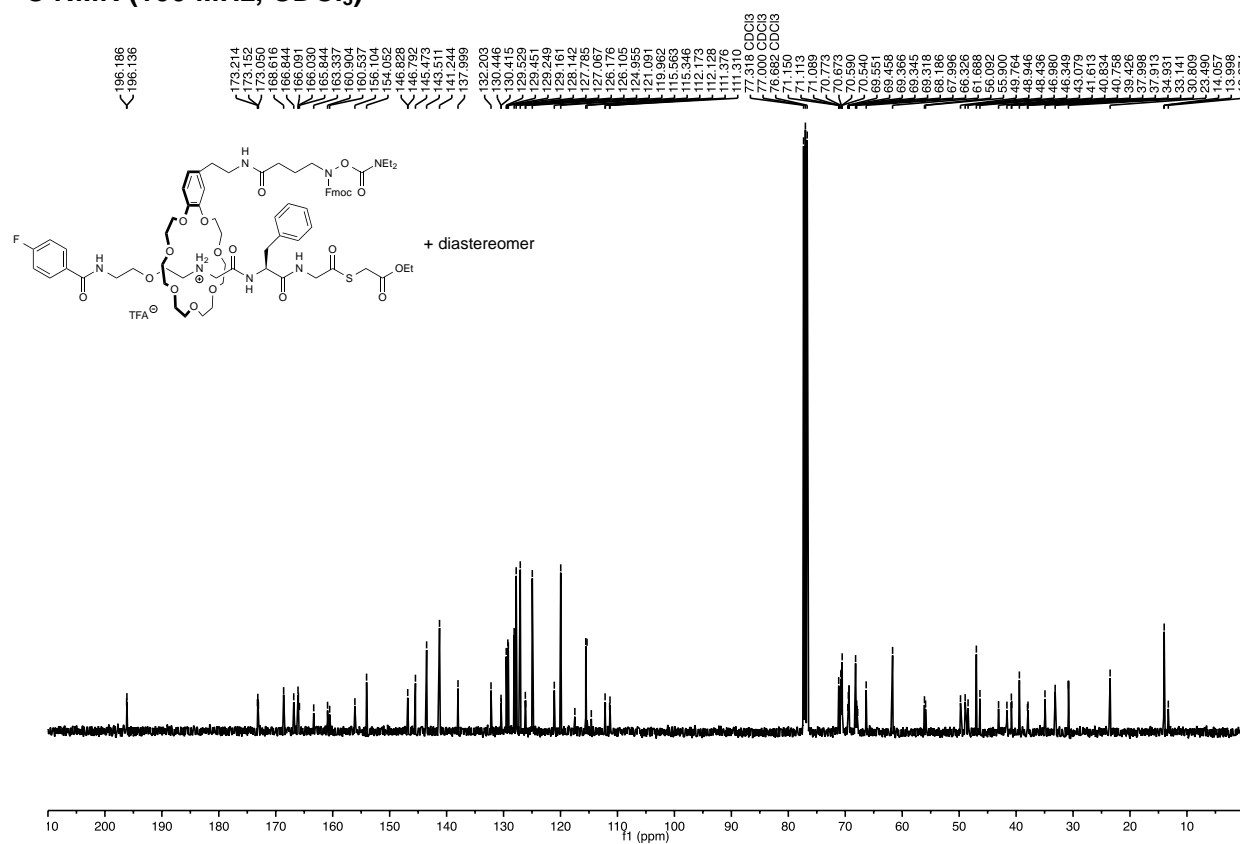

**$^{19}\text{F}$  NMR (376 MHz,  $\text{CDCl}_3$ )**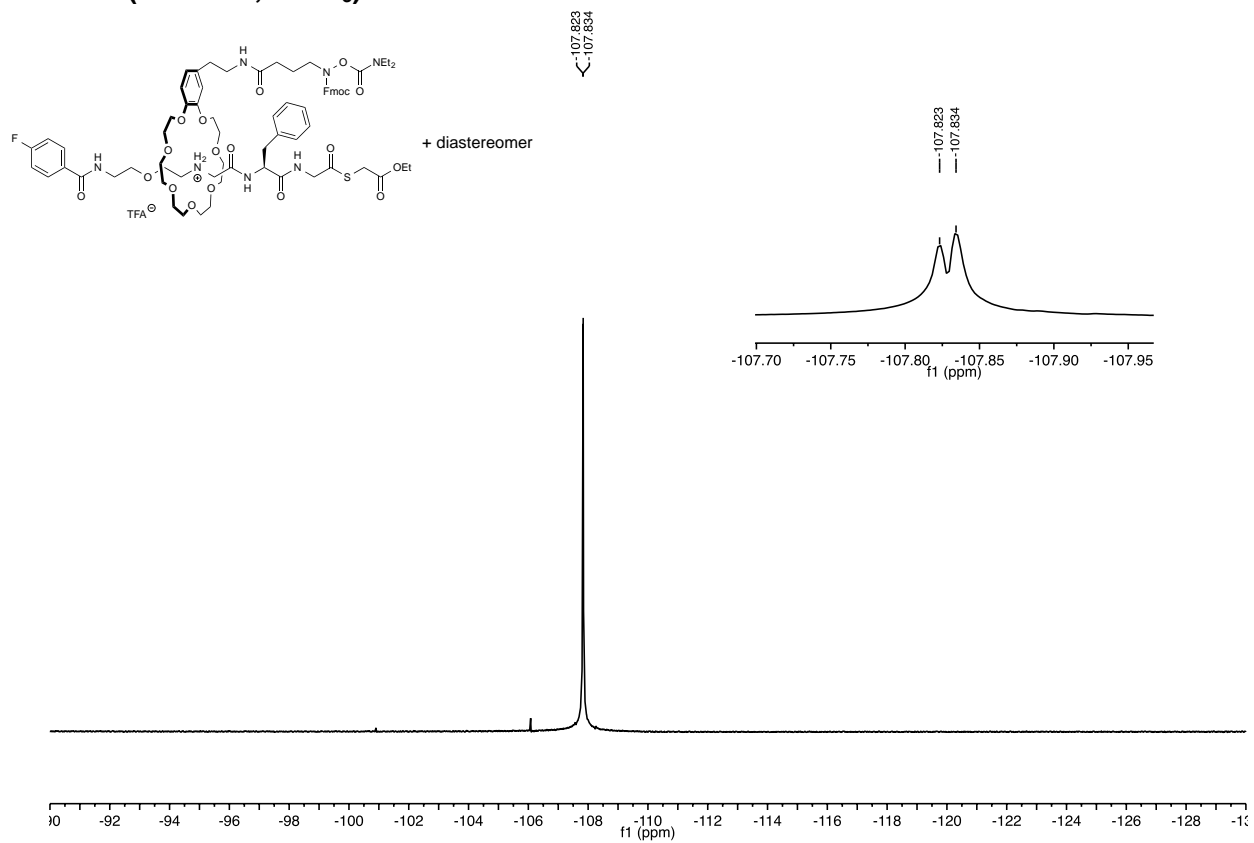

## Axle 5

 $^1\text{H}$  NMR (400 MHz,  $\text{CDCl}_3$ )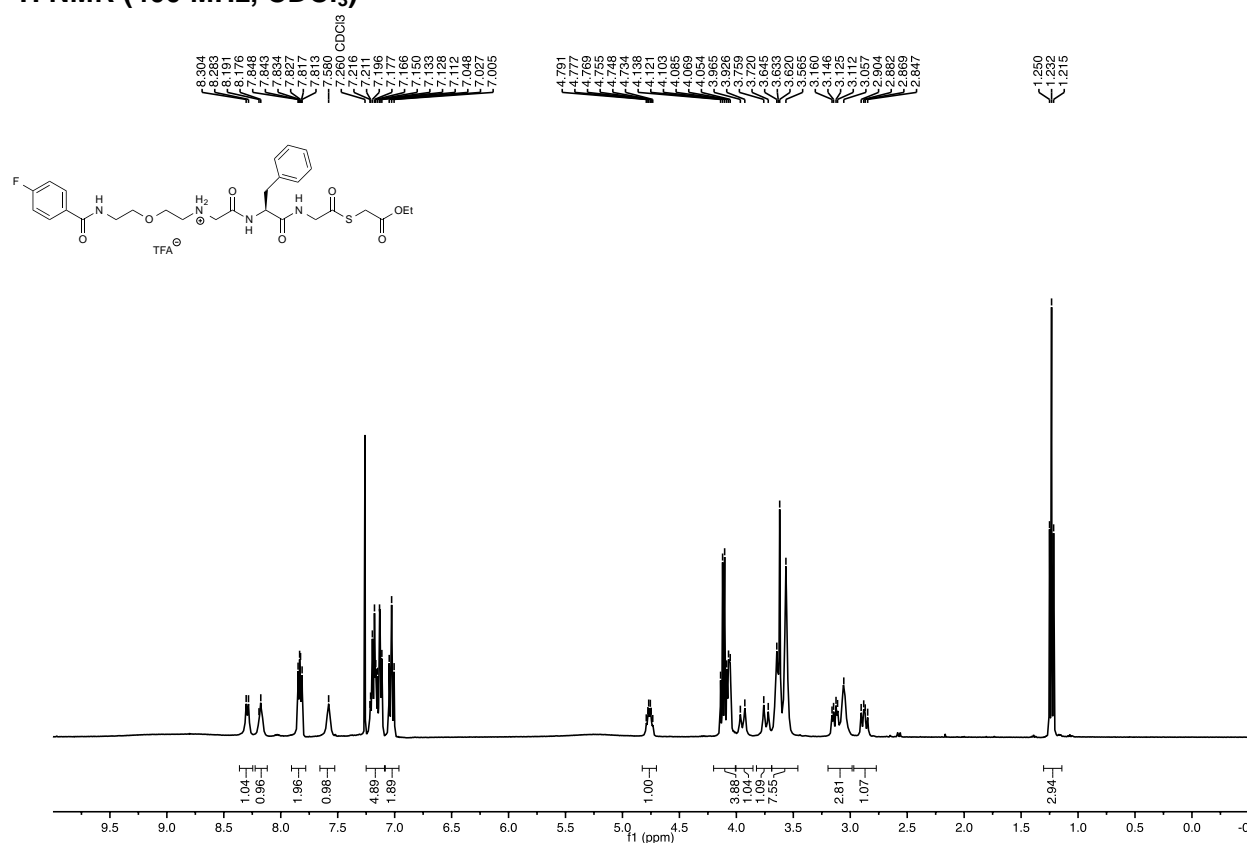 $^{13}\text{C}$  NMR (100 MHz,  $\text{CDCl}_3$ )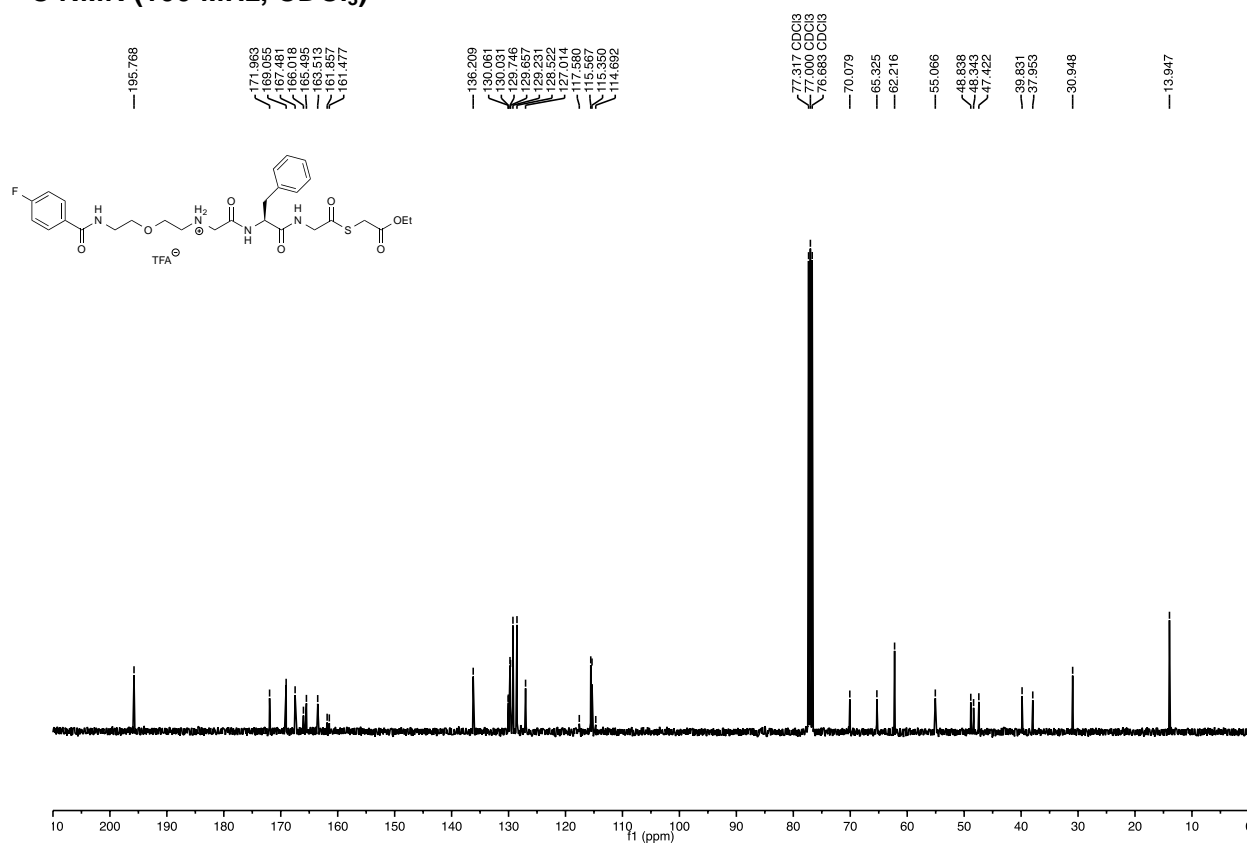

**$^{19}\text{F}$  NMR (376 MHz,  $\text{CDCl}_3$ )**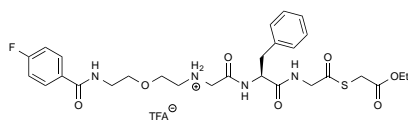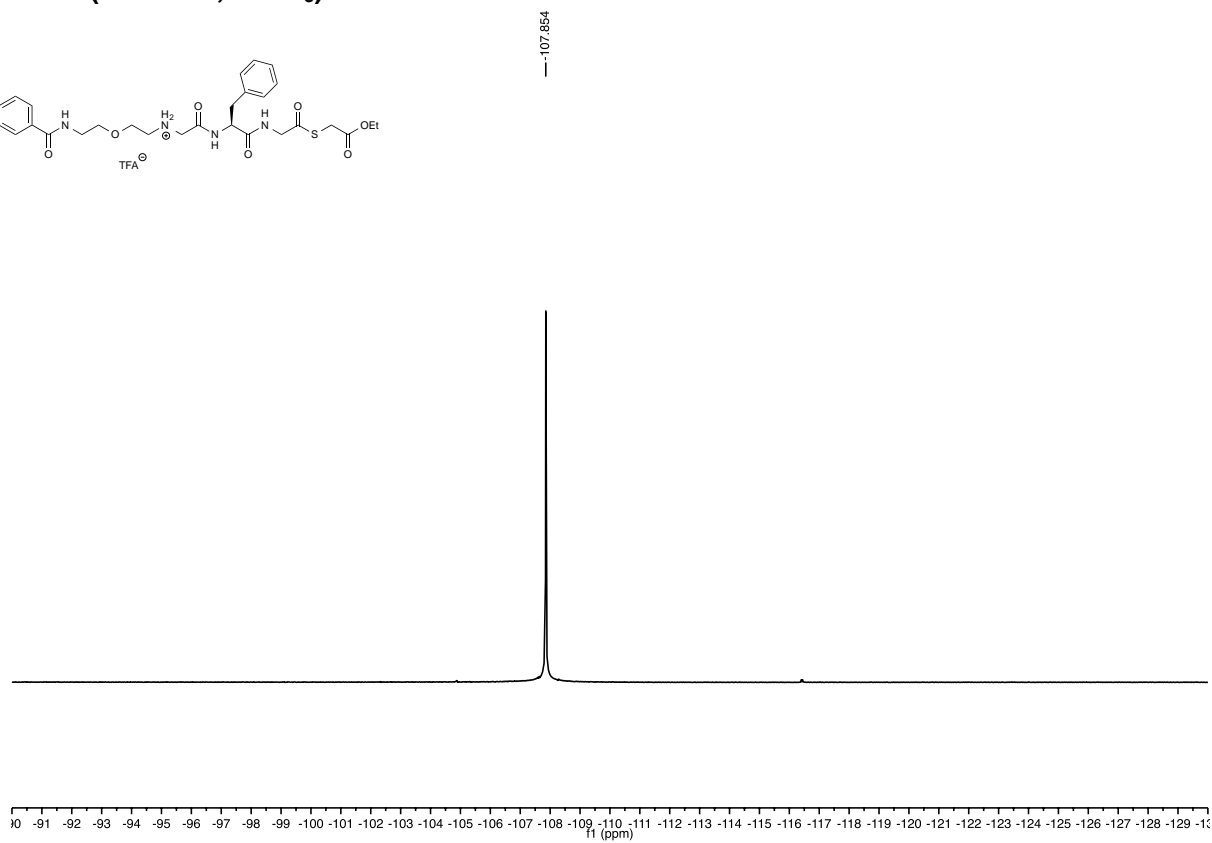

## Lasso peptide L1

 $^1\text{H}$  NMR (600 MHz,  $d_7$ -DMF)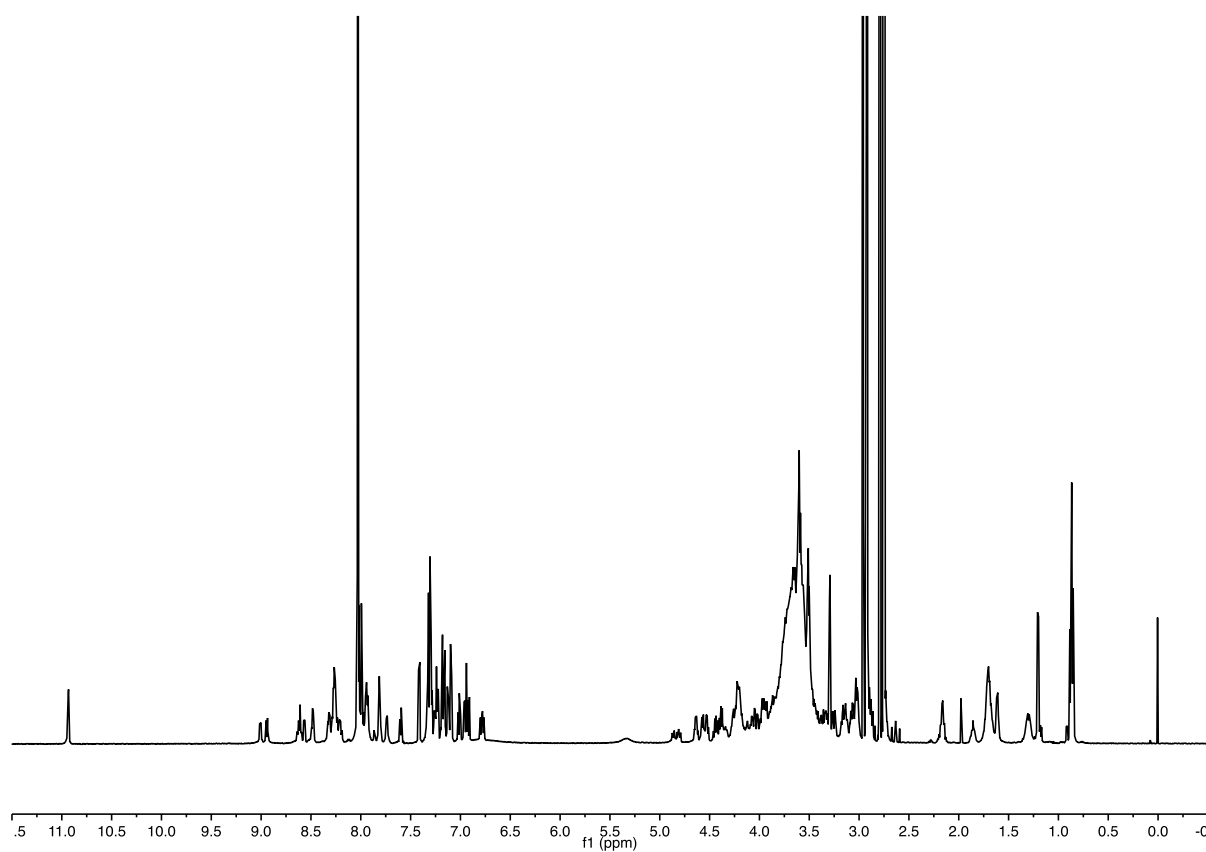 $^{13}\text{C}$  NMR (150 MHz,  $d_7$ -DMF)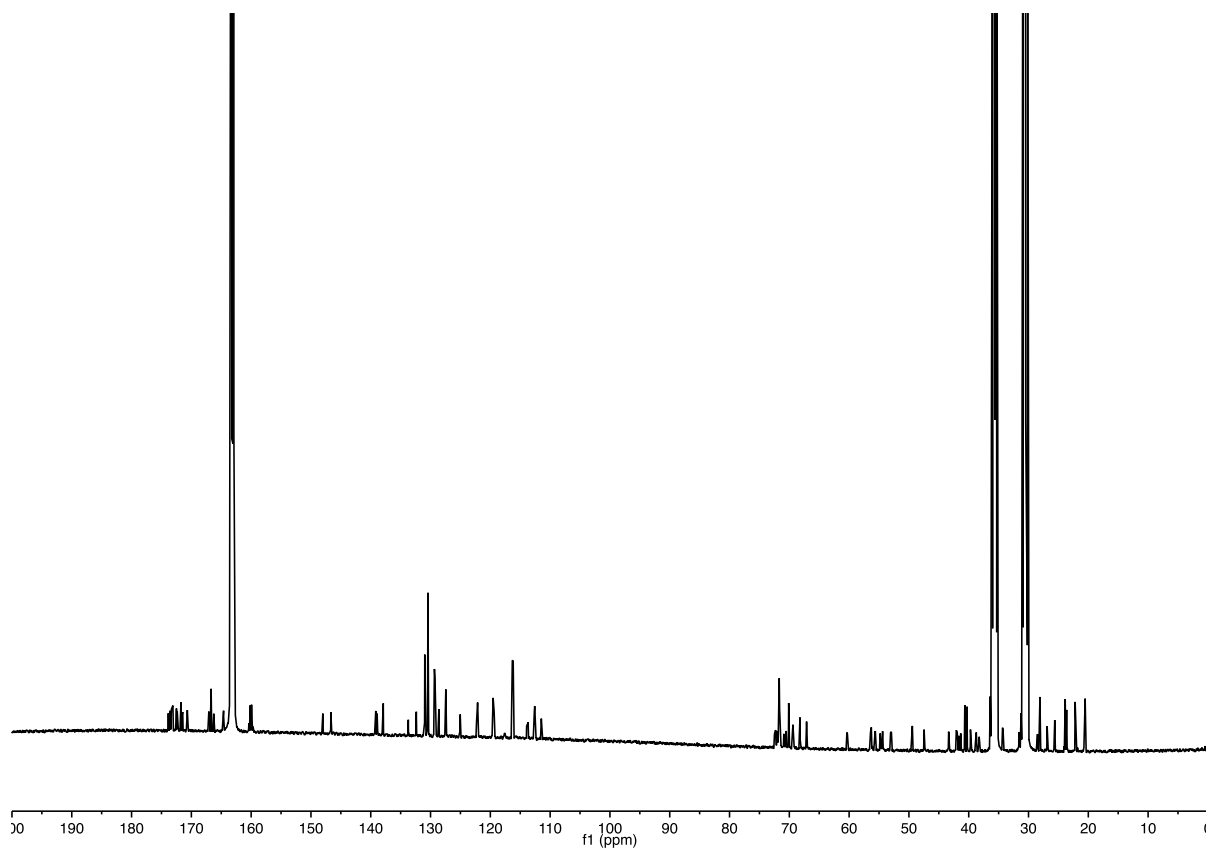

**$^{19}\text{F}$  NMR (565 MHz,  $\text{d}_7\text{-DMF}$ )**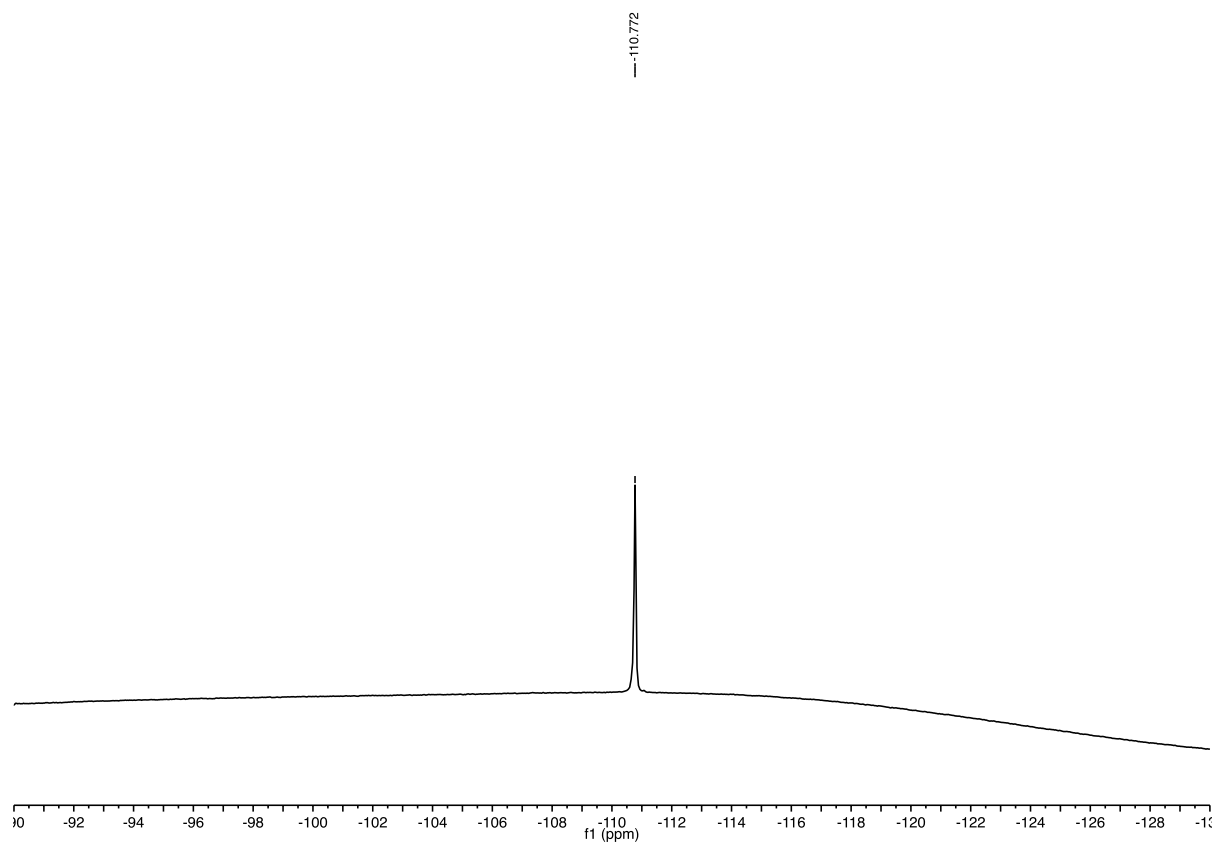 **$^1\text{H}$ - $^1\text{H}$  DQF-COSY (600 MHz,  $\text{d}_7\text{-DMF}$ )**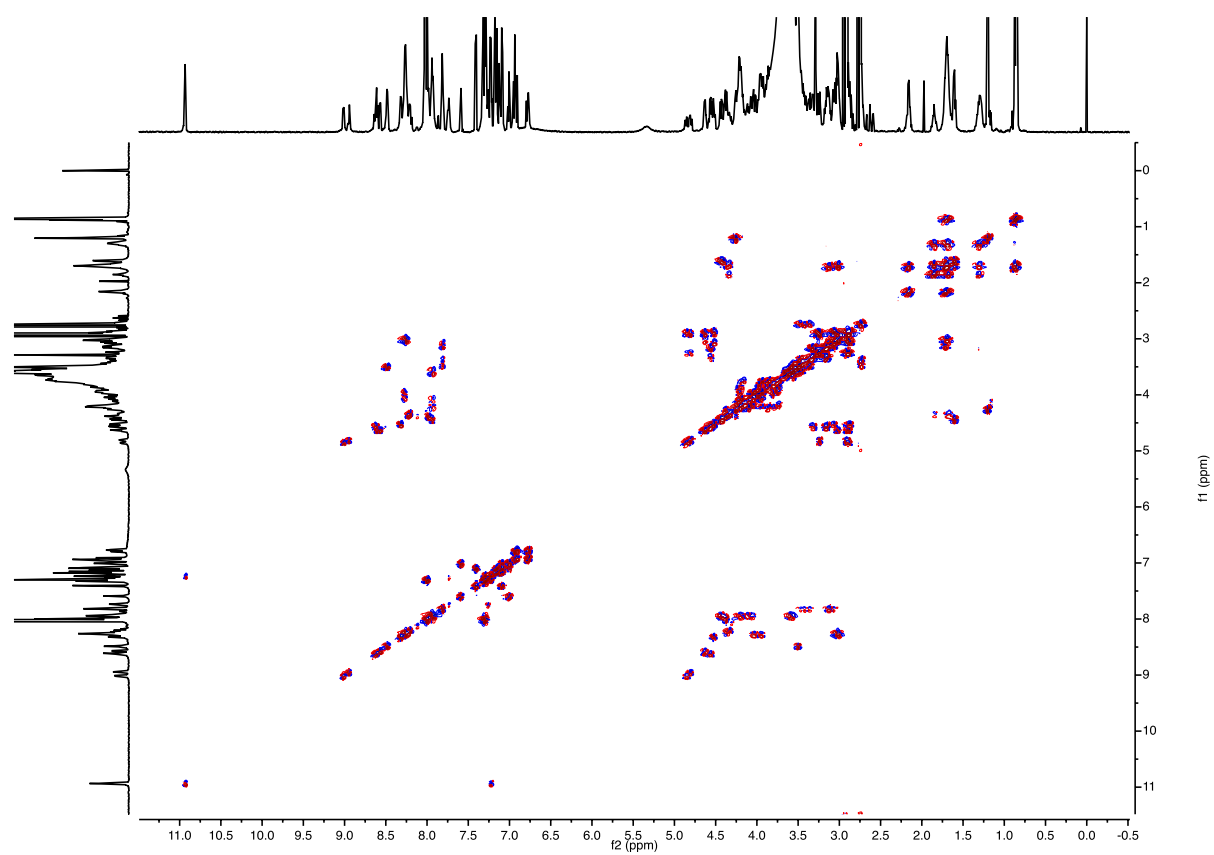

**$^1\text{H}$ - $^1\text{H}$  TOCSY (600 MHz,  $d_7$ -DMF)**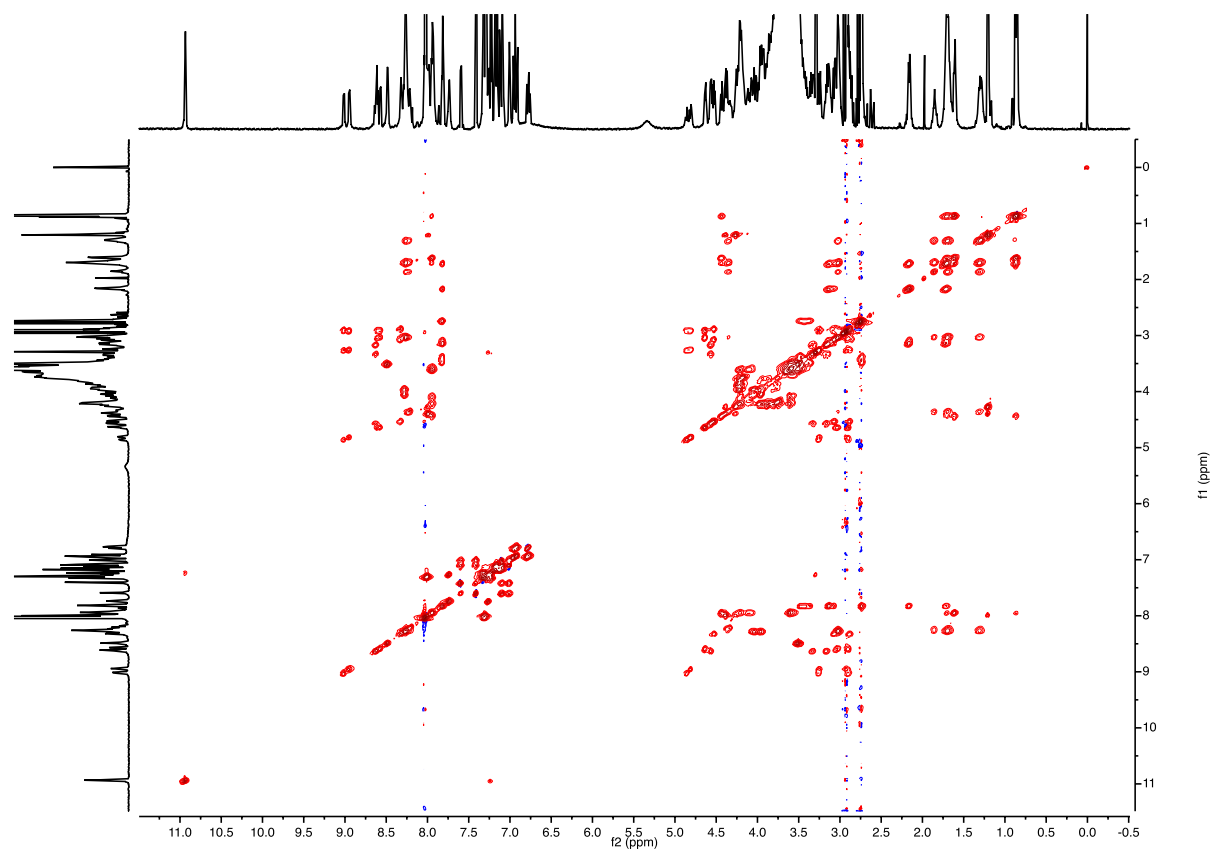 **$^1\text{H}$ - $^{13}\text{C}$  HSQC (600 MHz,  $d_7$ -DMF)**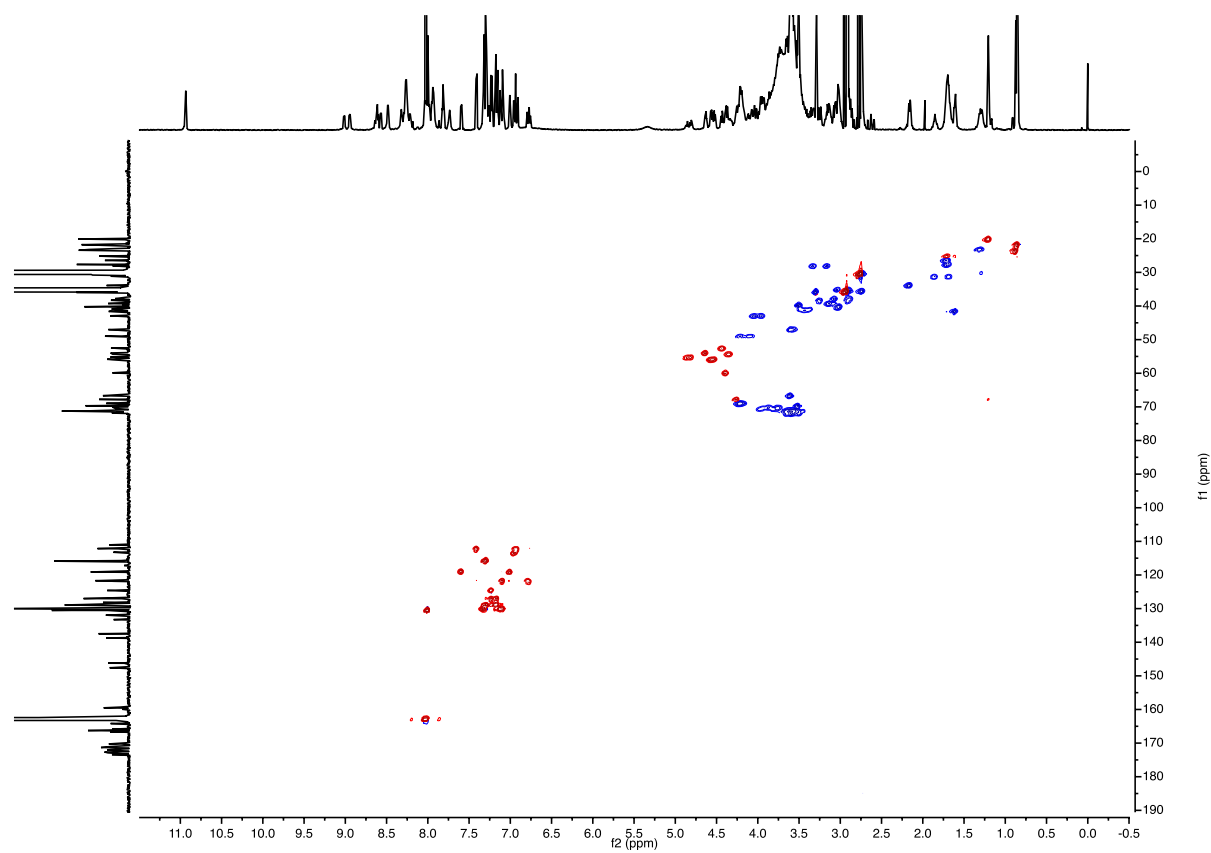



$^1\text{H}$ - $^{13}\text{C}$  HMBC (600 MHz,  $d_7$ -DMF)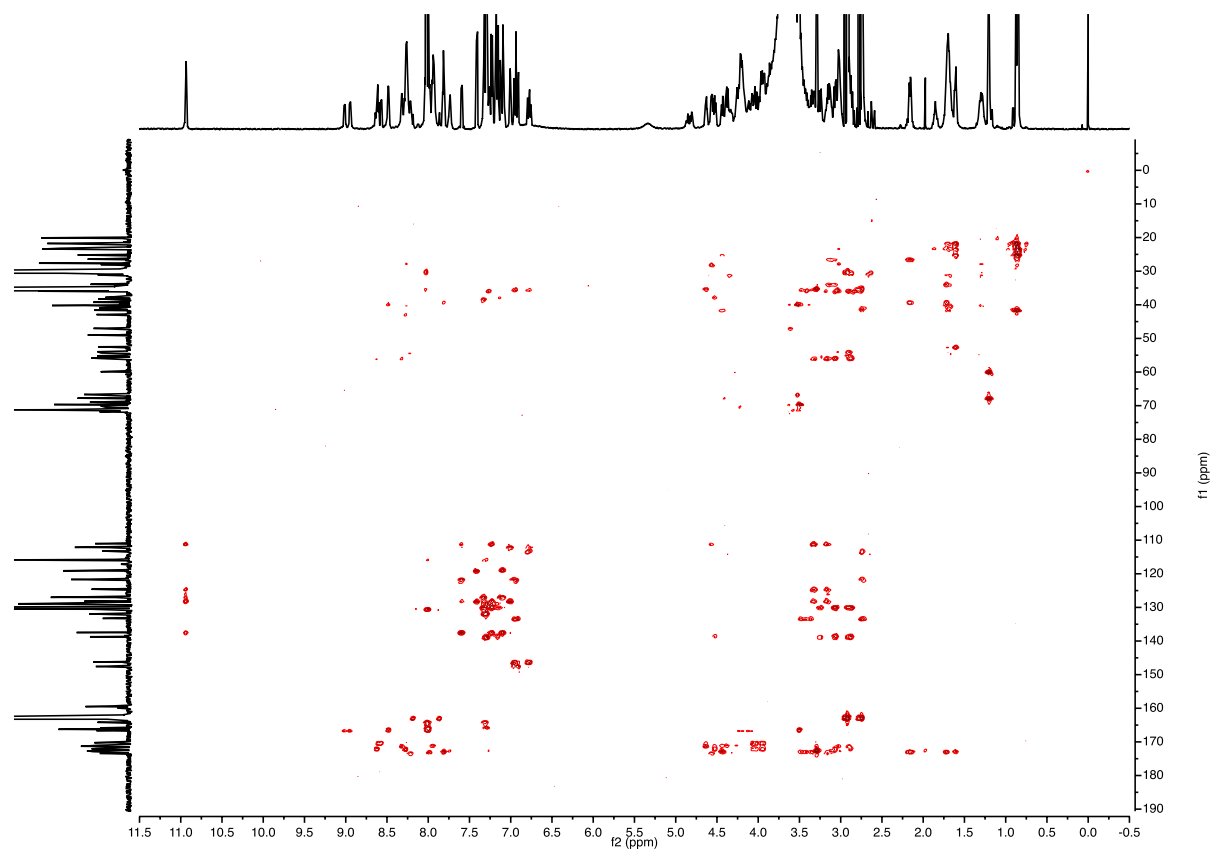 $^1\text{H}$ - $^1\text{H}$  ROESY (600 MHz,  $d_7$ -DMF)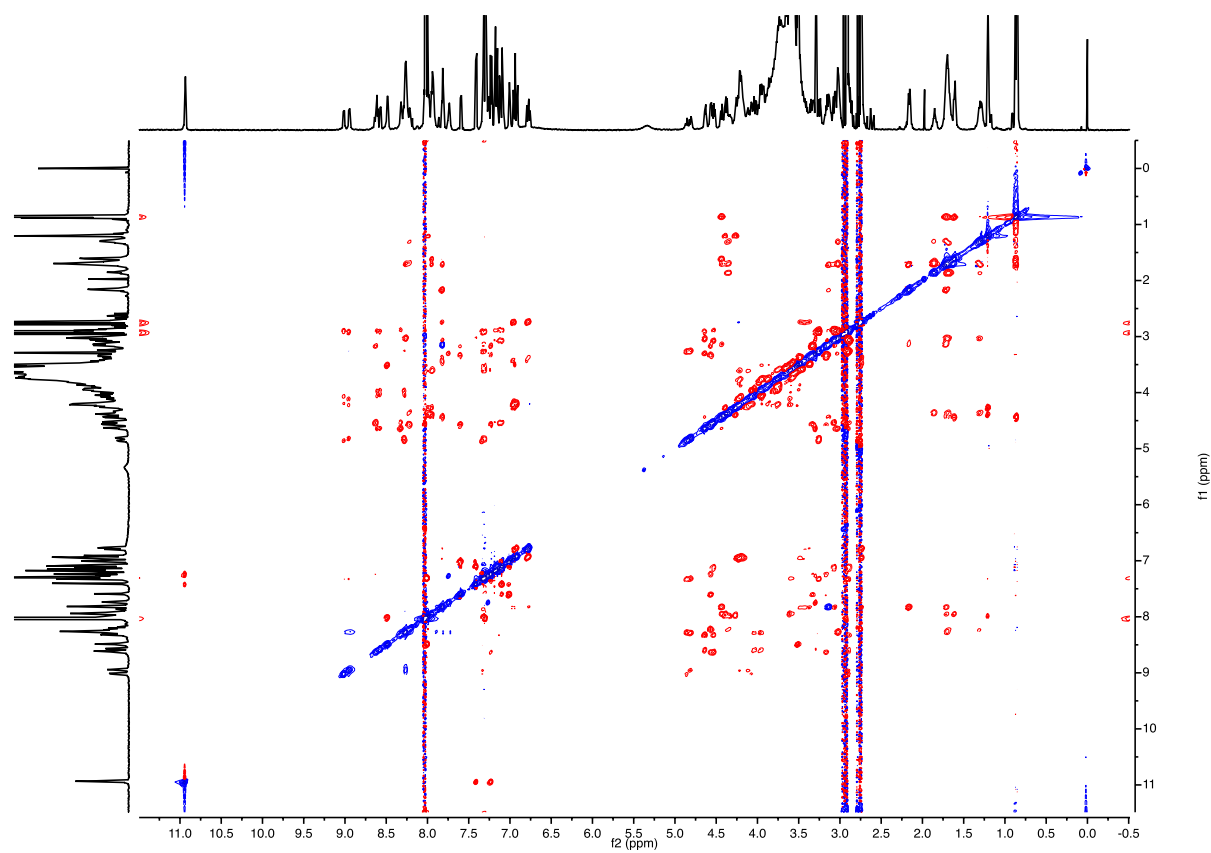

$^1\text{H}$ - $^{15}\text{N}$  HSQC ( $d_7$ -DMF)

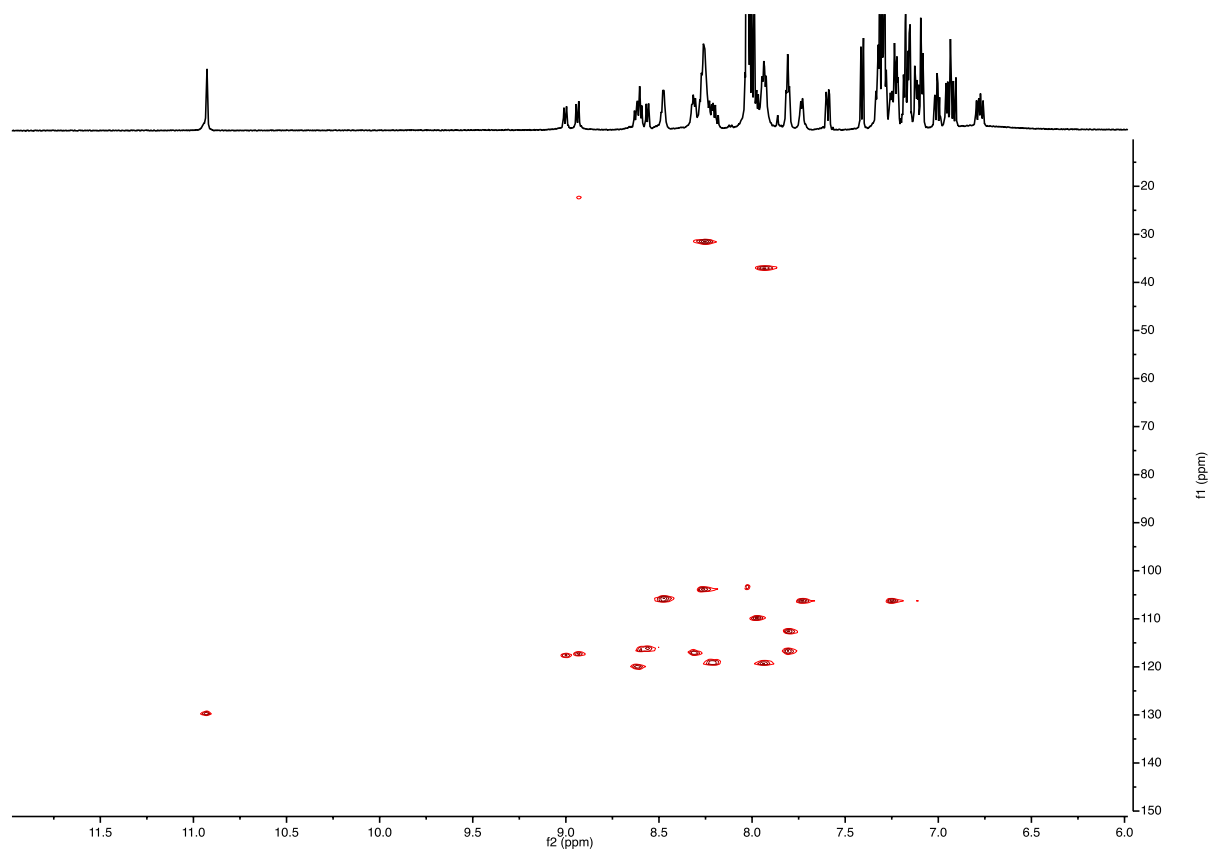

**Branched-cyclic peptide B1** **$^1\text{H}$  NMR (600 MHz,  $\text{d}_7\text{-DMF}$ )**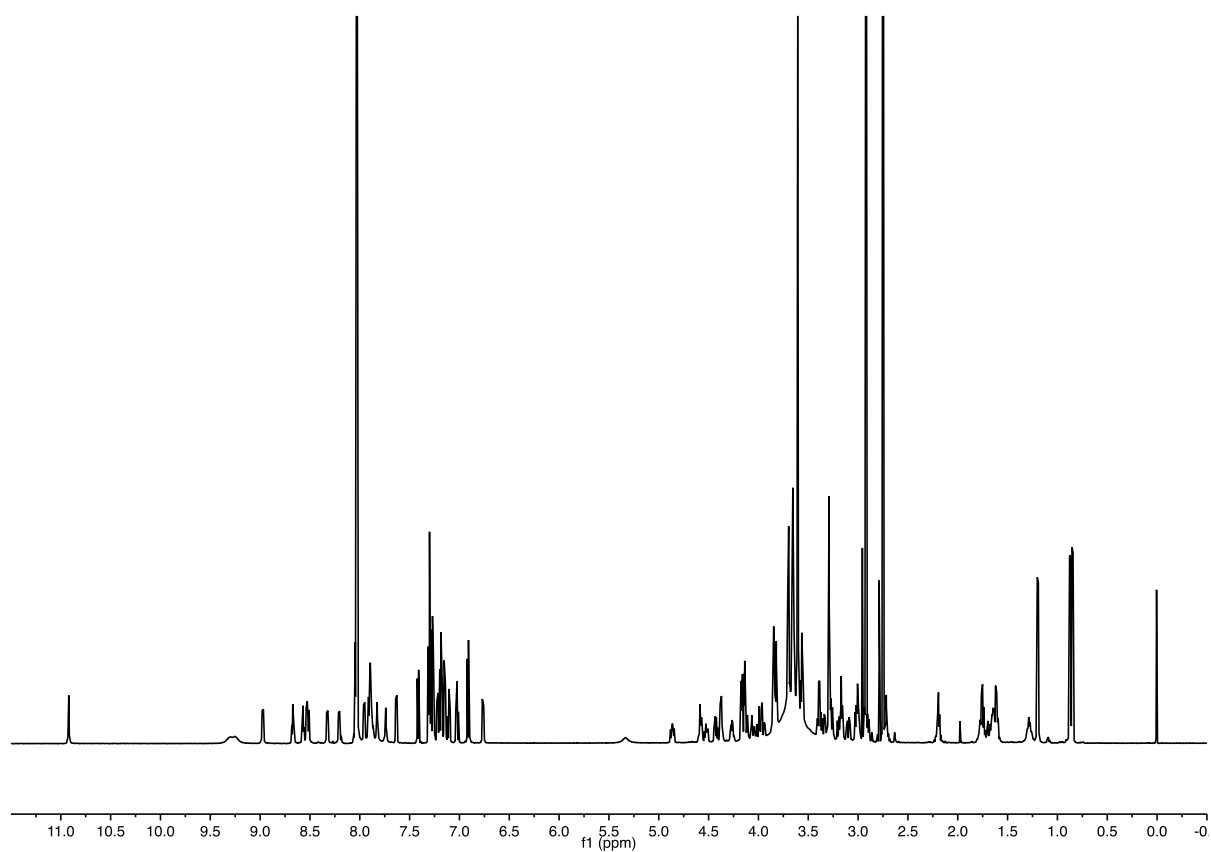 **$^{13}\text{C}$  NMR (150 MHz,  $\text{d}_7\text{-DMF}$ )**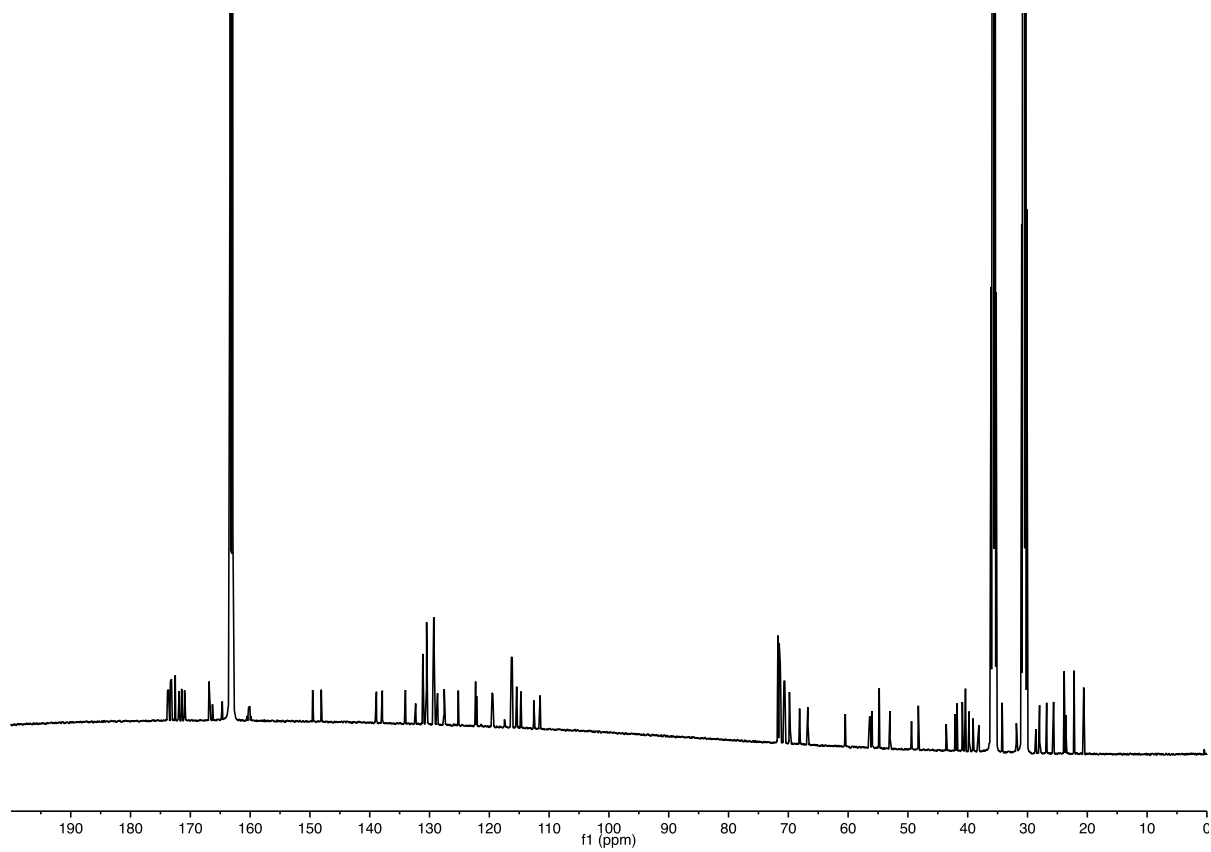

$^{19}\text{F}$  NMR (565 MHz,  $\text{d}_7\text{-DMF}$ )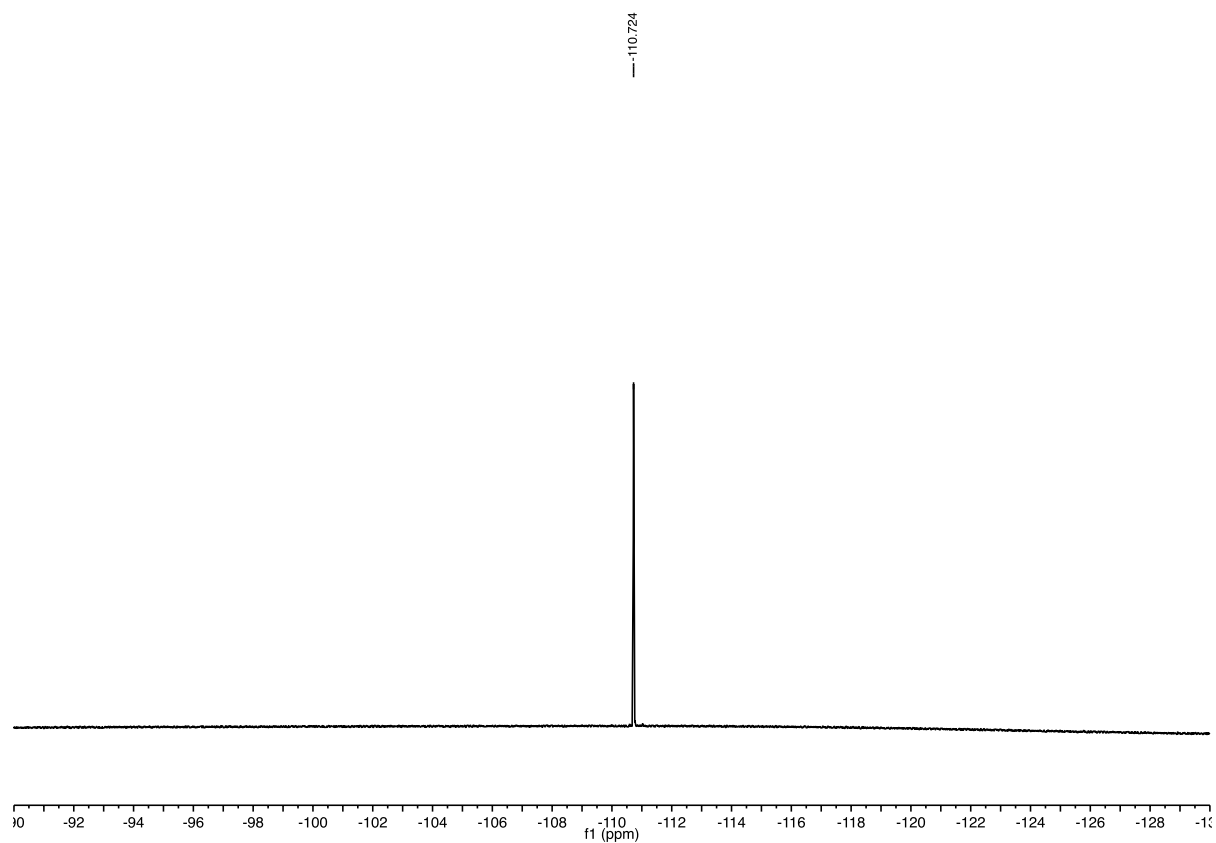 $^1\text{H}$ - $^{15}\text{N}$  HSQC ( $\text{d}_7\text{-DMF}$ )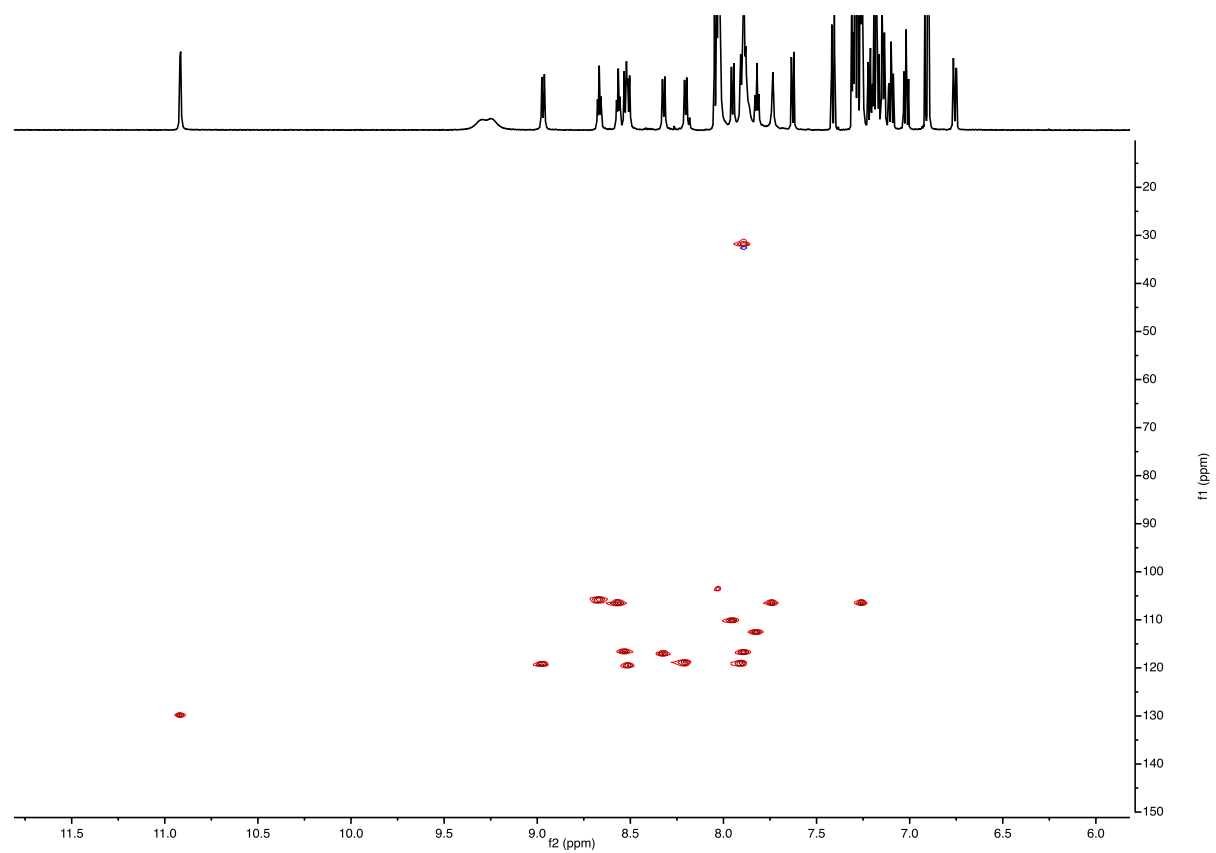

## Crown ether-diBn amine S21

 $^1\text{H}$  NMR (400 MHz,  $\text{CDCl}_3$ )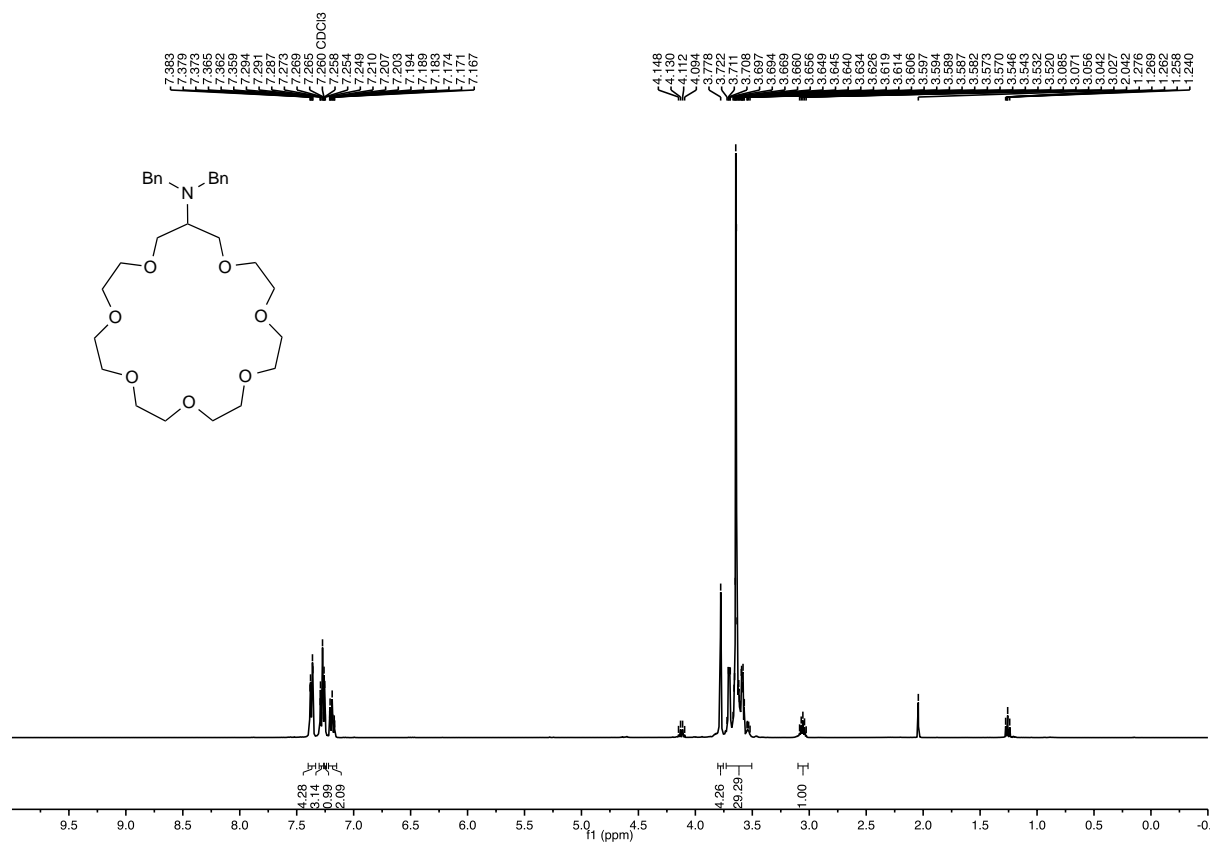 $^{13}\text{C}$  NMR (100 MHz,  $\text{CDCl}_3$ )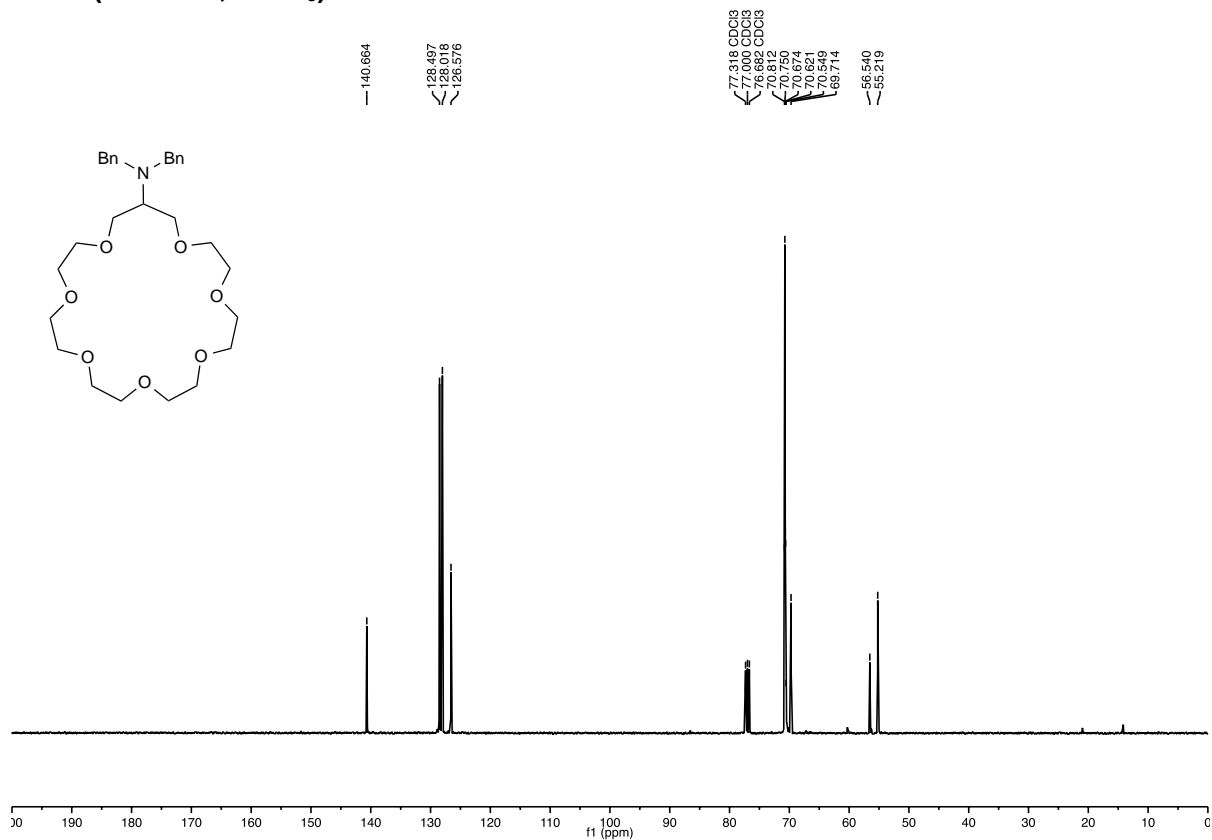

Crown ether-*N*-Fmoc hydroxylamine 13 $^1\text{H}$  NMR (400 MHz,  $\text{CDCl}_3$ )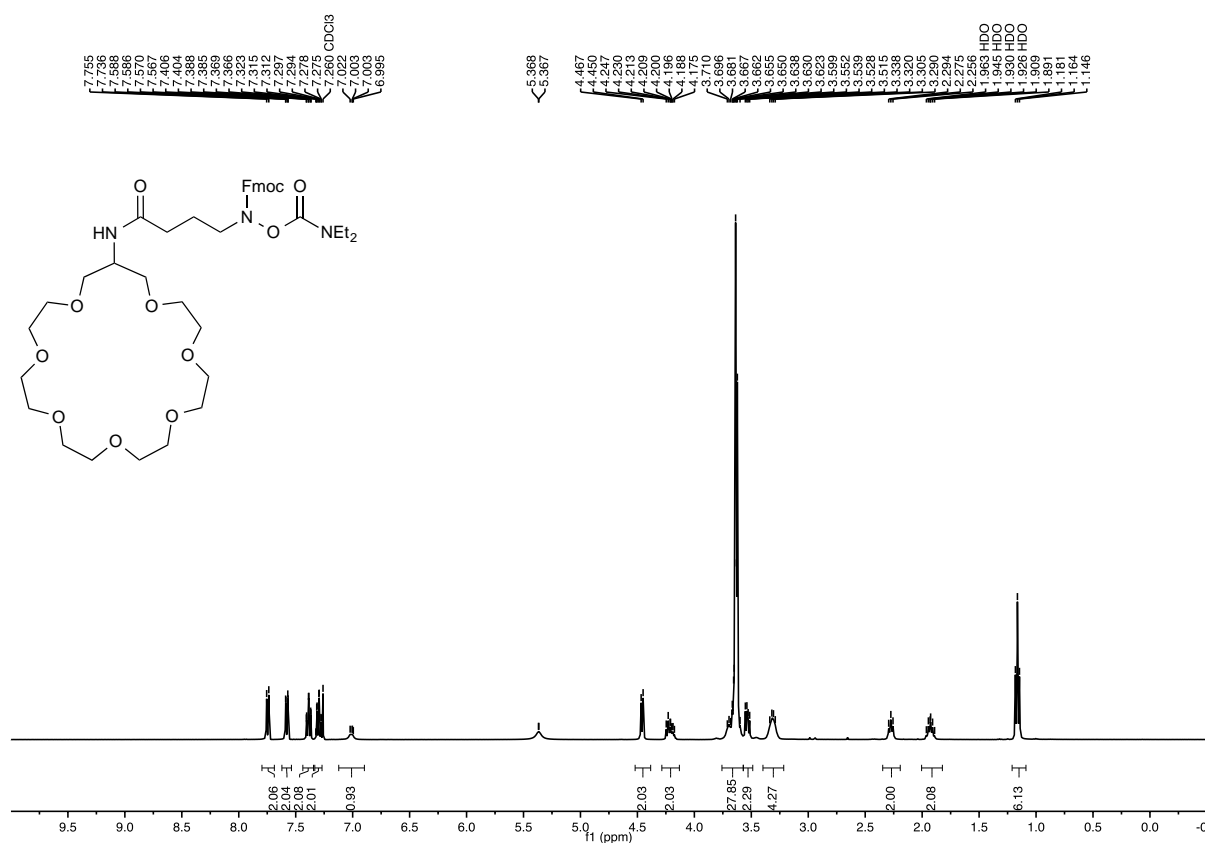 $^{13}\text{C}$  NMR (100 MHz,  $\text{CDCl}_3$ )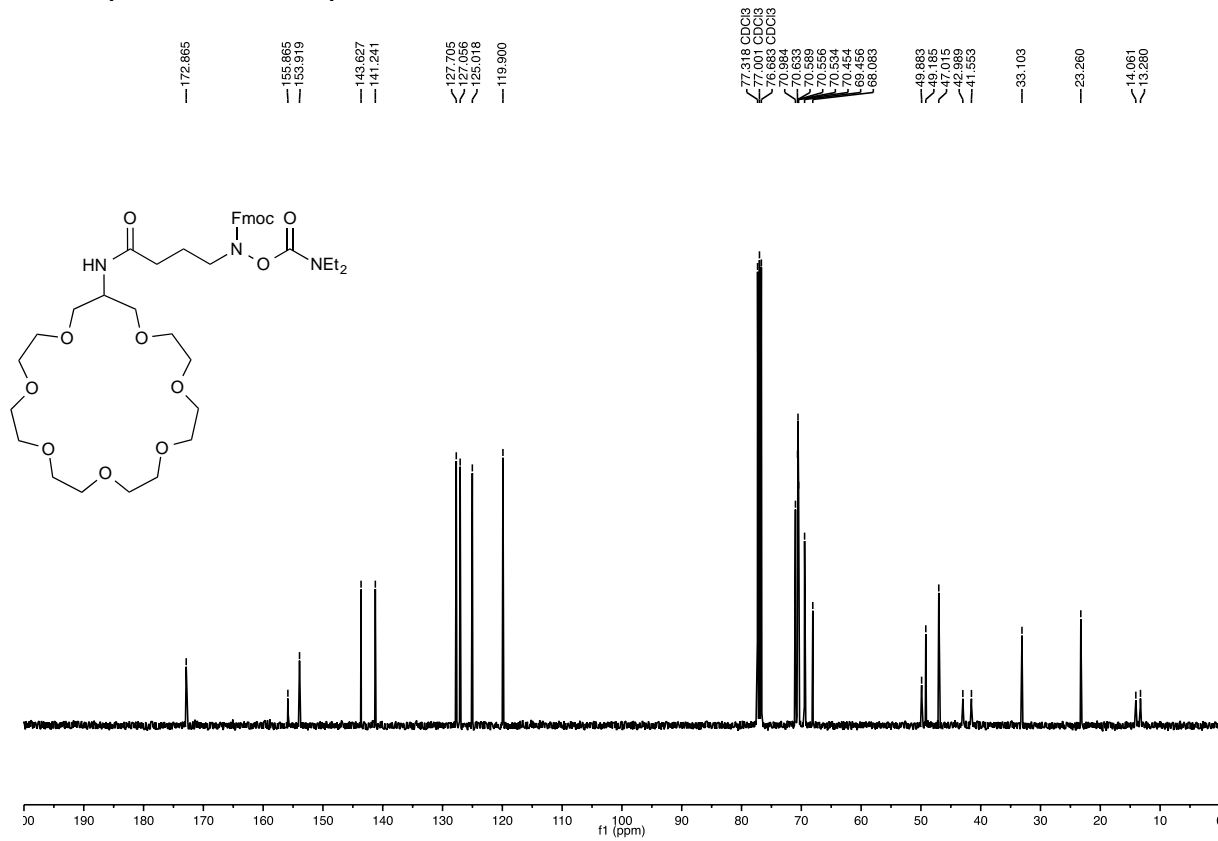

Bt-ethoxy *N,O*-acetal S22<sup>1</sup>H NMR (400 MHz, CDCl<sub>3</sub>)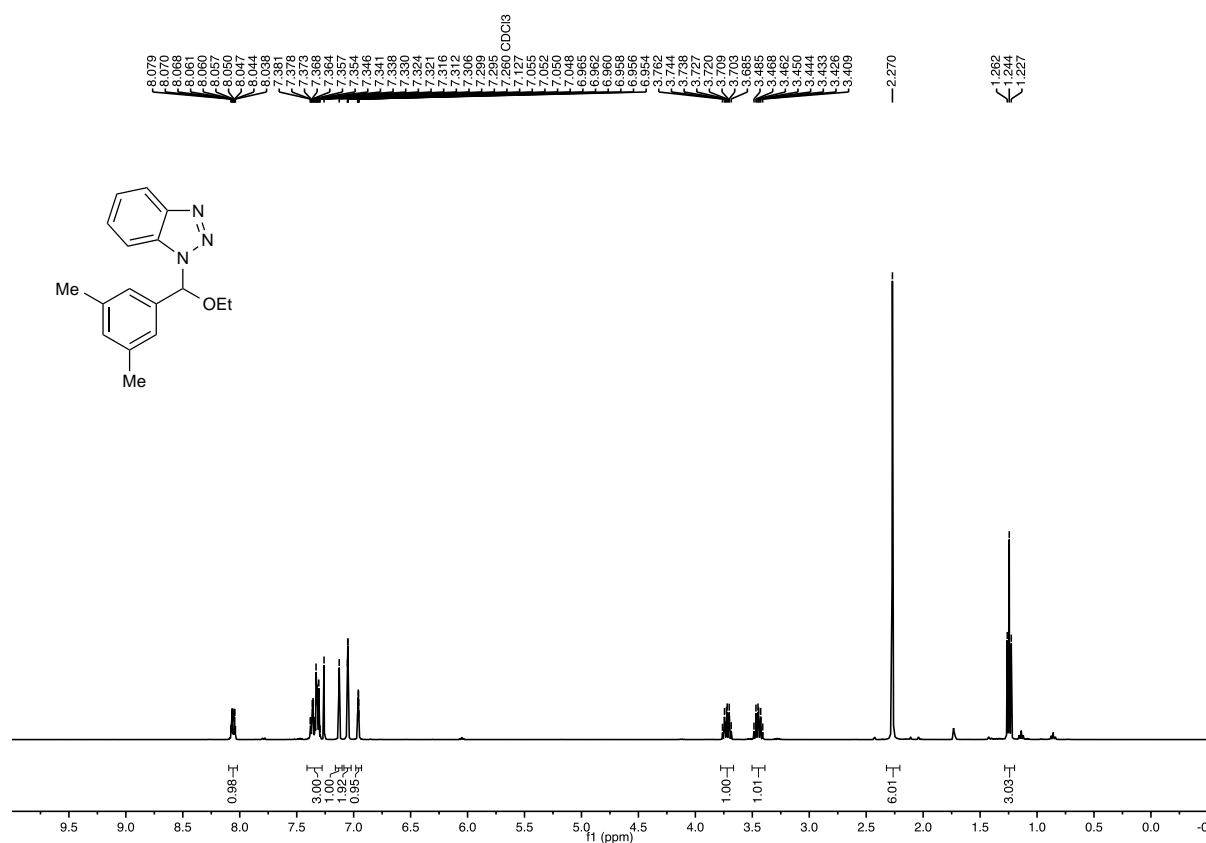<sup>13</sup>C NMR (100 MHz, CDCl<sub>3</sub>)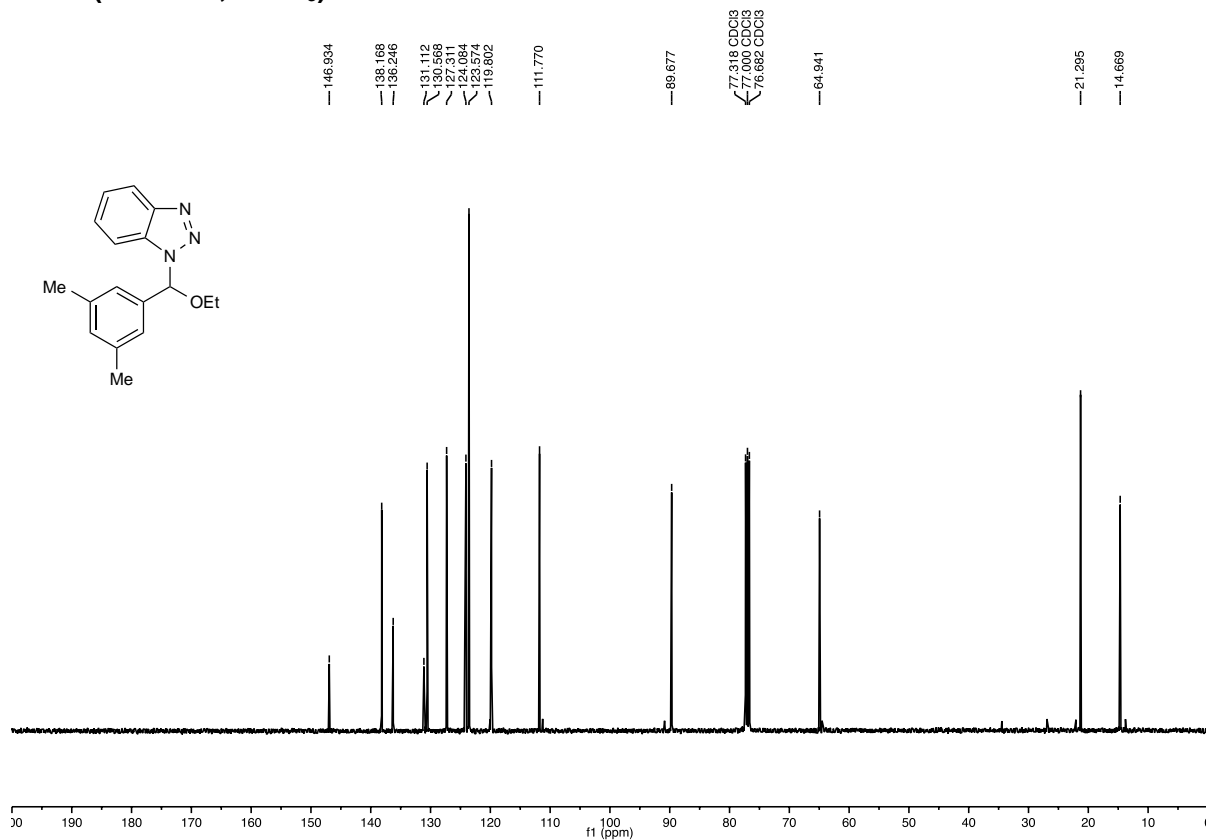

## 3,5-Dimethylphenyl KAT 15

 $^1\text{H}$  NMR (600 MHz,  $\text{d}_6$ -acetone)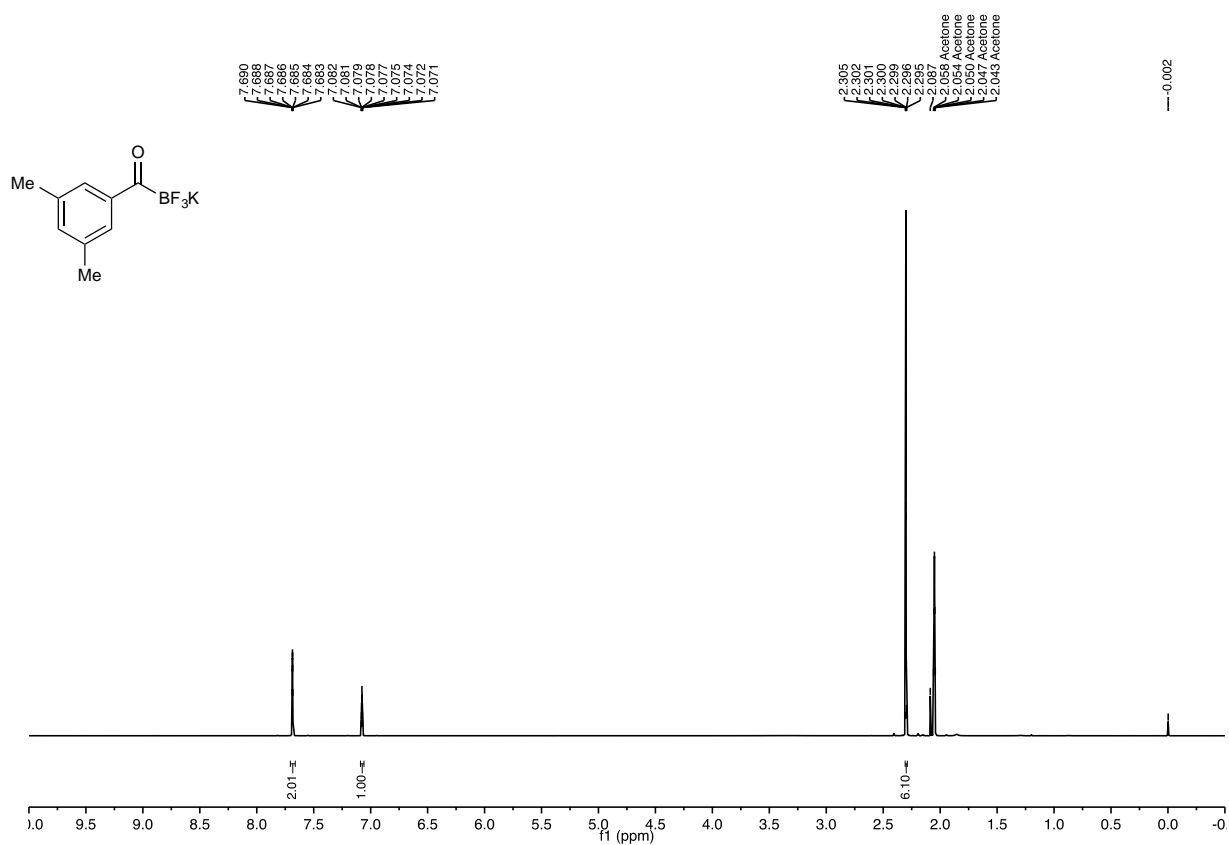 $^{13}\text{C}$  NMR (150 MHz,  $\text{d}_6$ -acetone)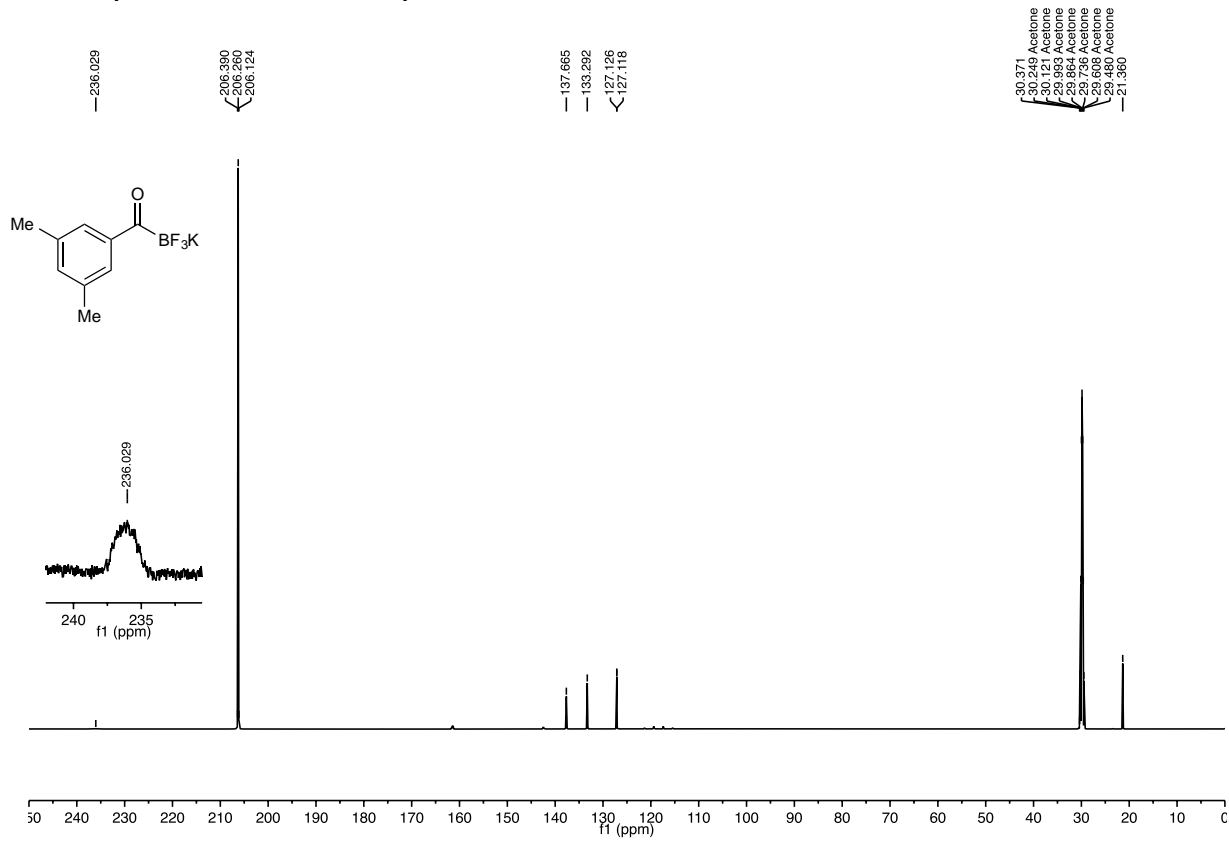



**<sup>19</sup>F NMR (470 MHz, d<sub>6</sub>-acetone)**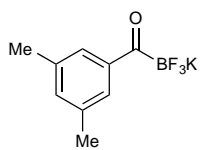

144.297  
144.379  
144.502  
144.582

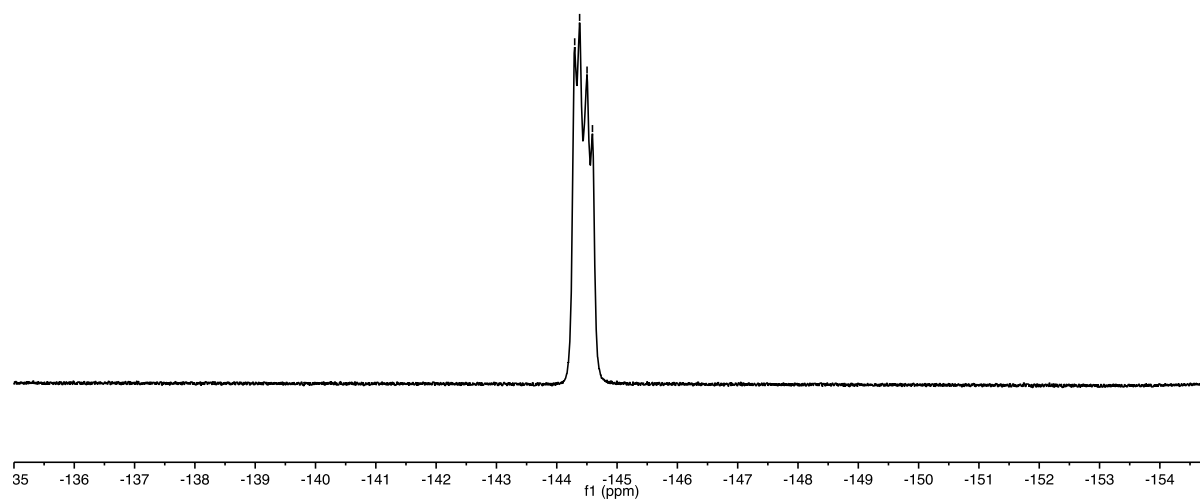**<sup>11</sup>B NMR (160 MHz, d<sub>6</sub>-acetone)**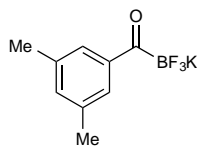

-0.331  
-0.654  
-0.978  
-1.301

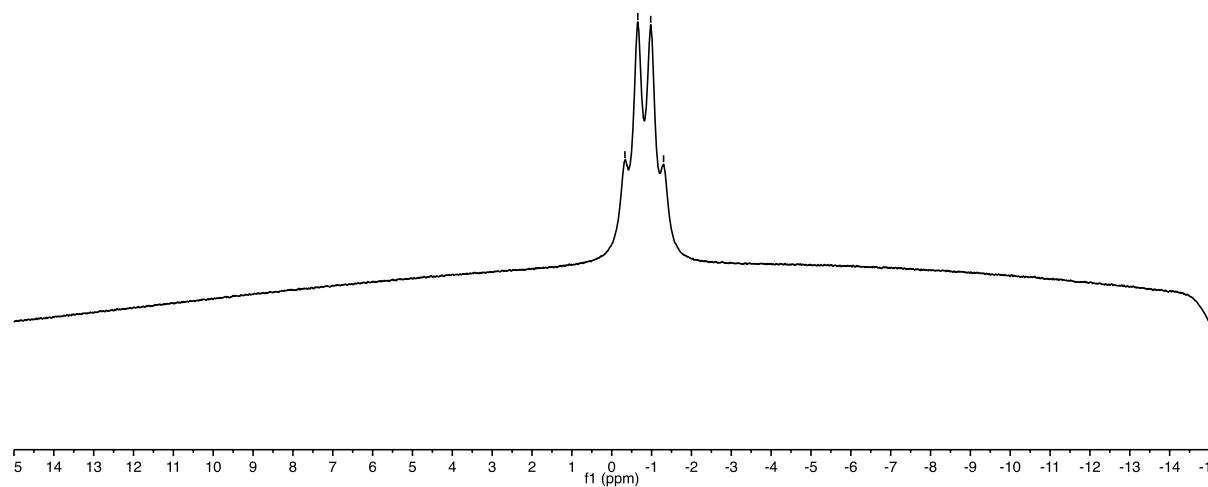

**[2]Rotaxane S23****<sup>1</sup>H NMR (600 MHz, CDCl<sub>3</sub>)**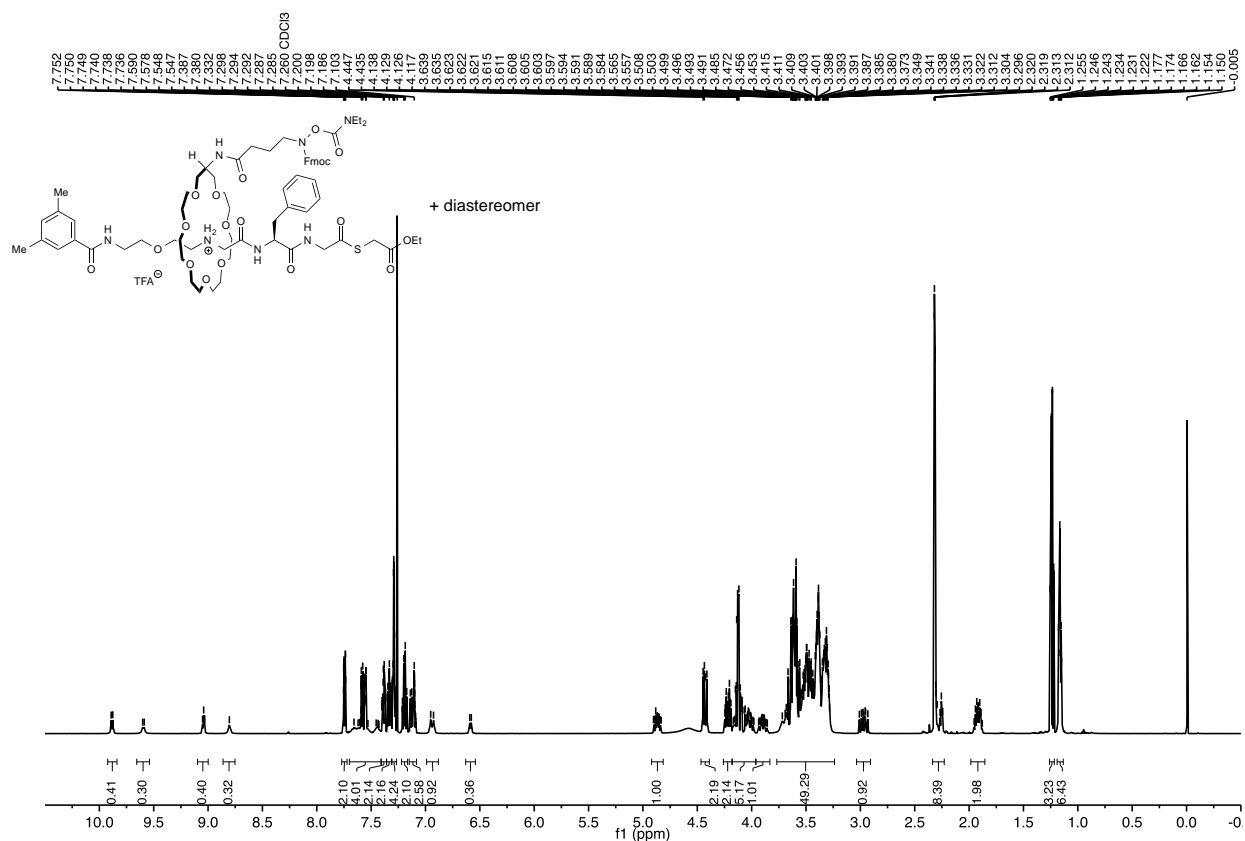**<sup>13</sup>C NMR (150 MHz, CDCl<sub>3</sub>)**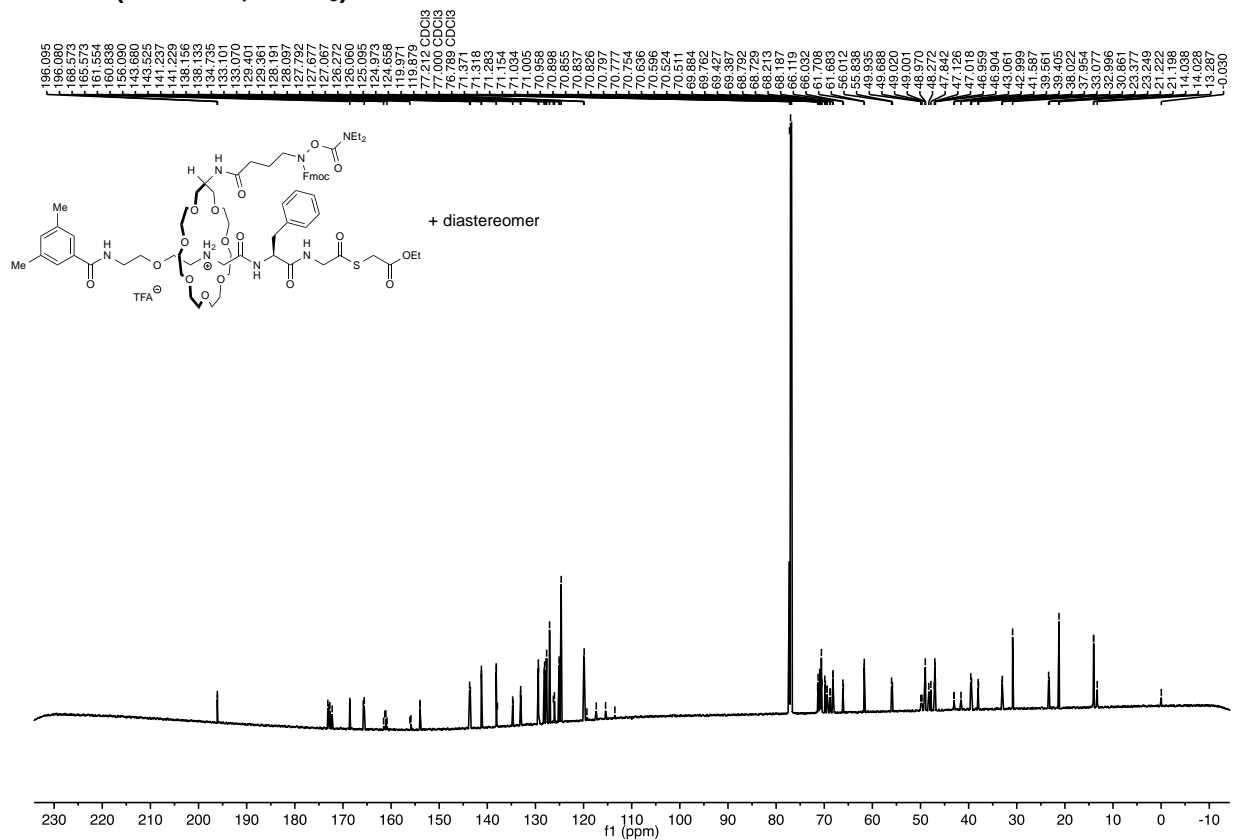

## Axle S24

 $^1\text{H}$  NMR (400 MHz,  $\text{CDCl}_3$ )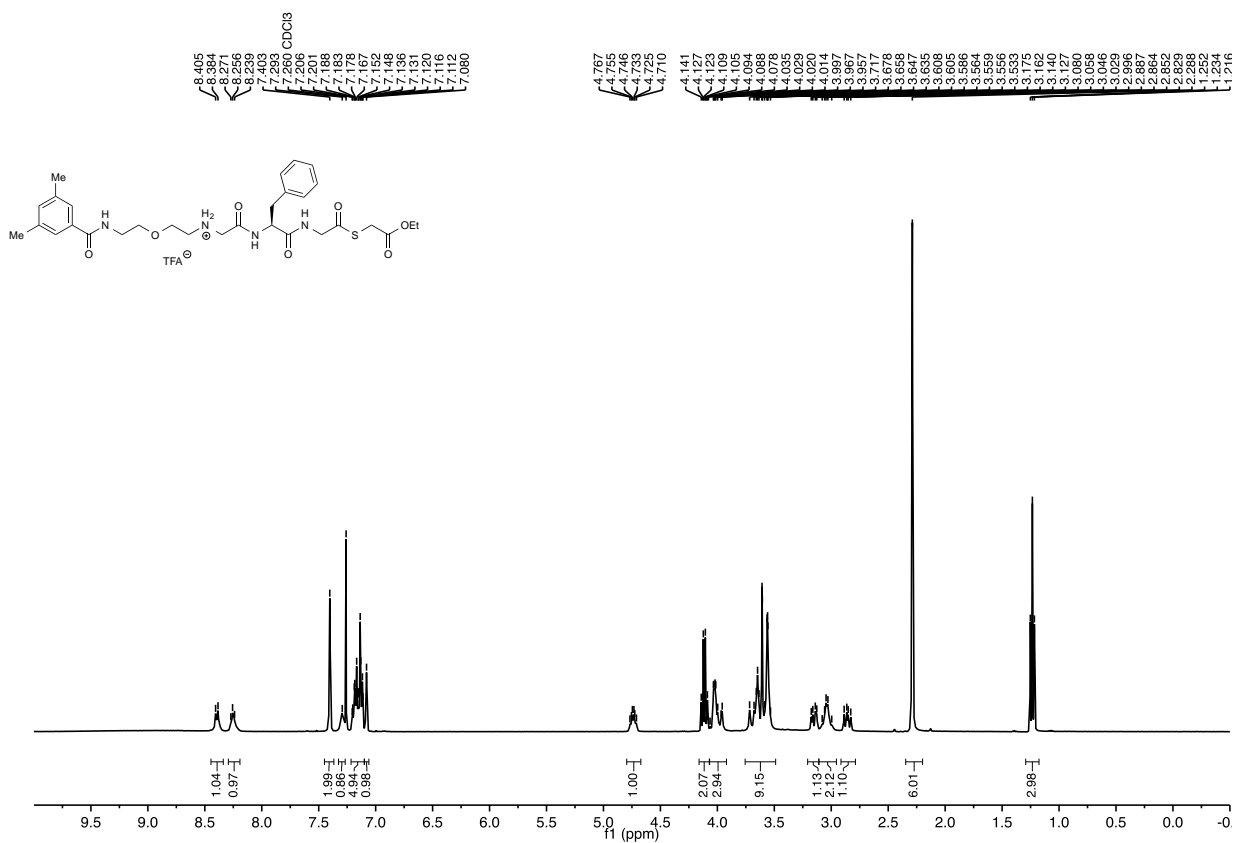 $^{13}\text{C}$  NMR (100 MHz,  $\text{CDCl}_3$ )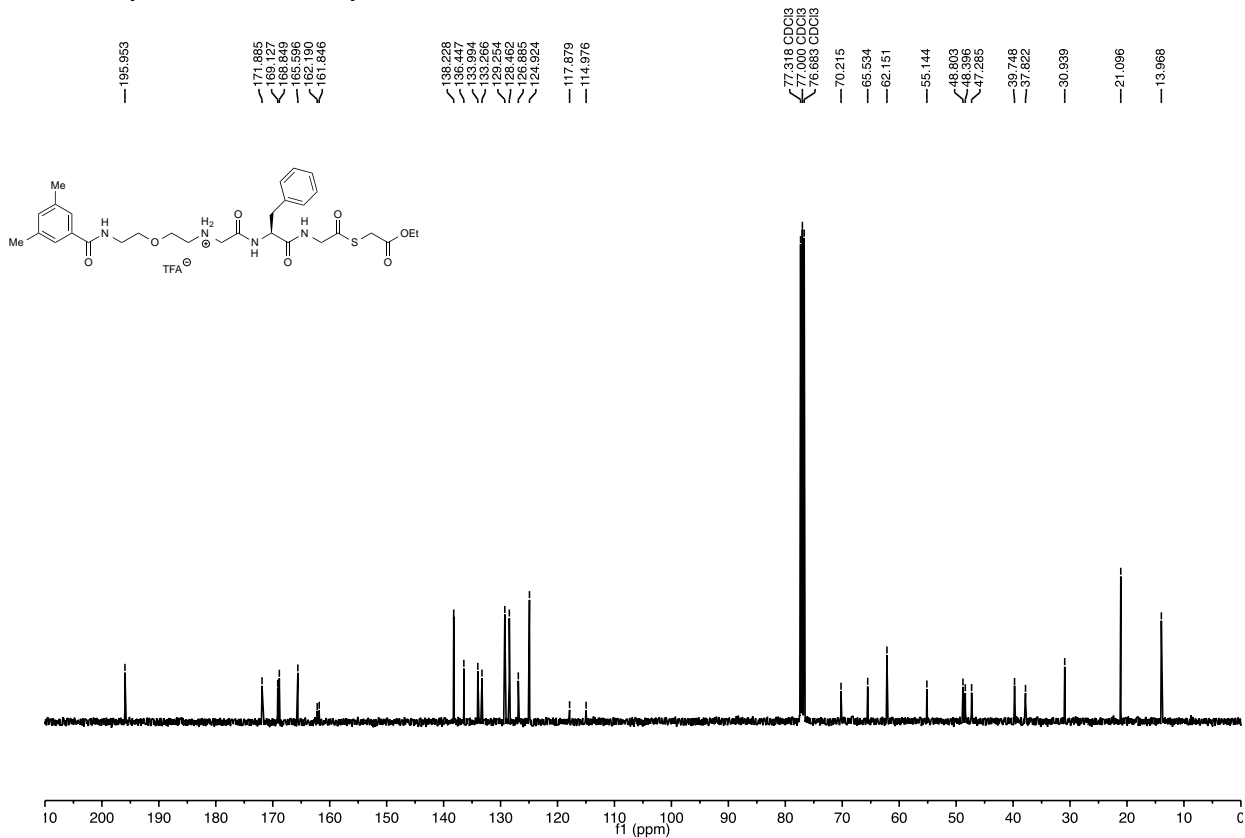

Crown ether *N*-Fmoc hydroxylamine 14 $^1\text{H}$  NMR (400 MHz,  $\text{CDCl}_3$ )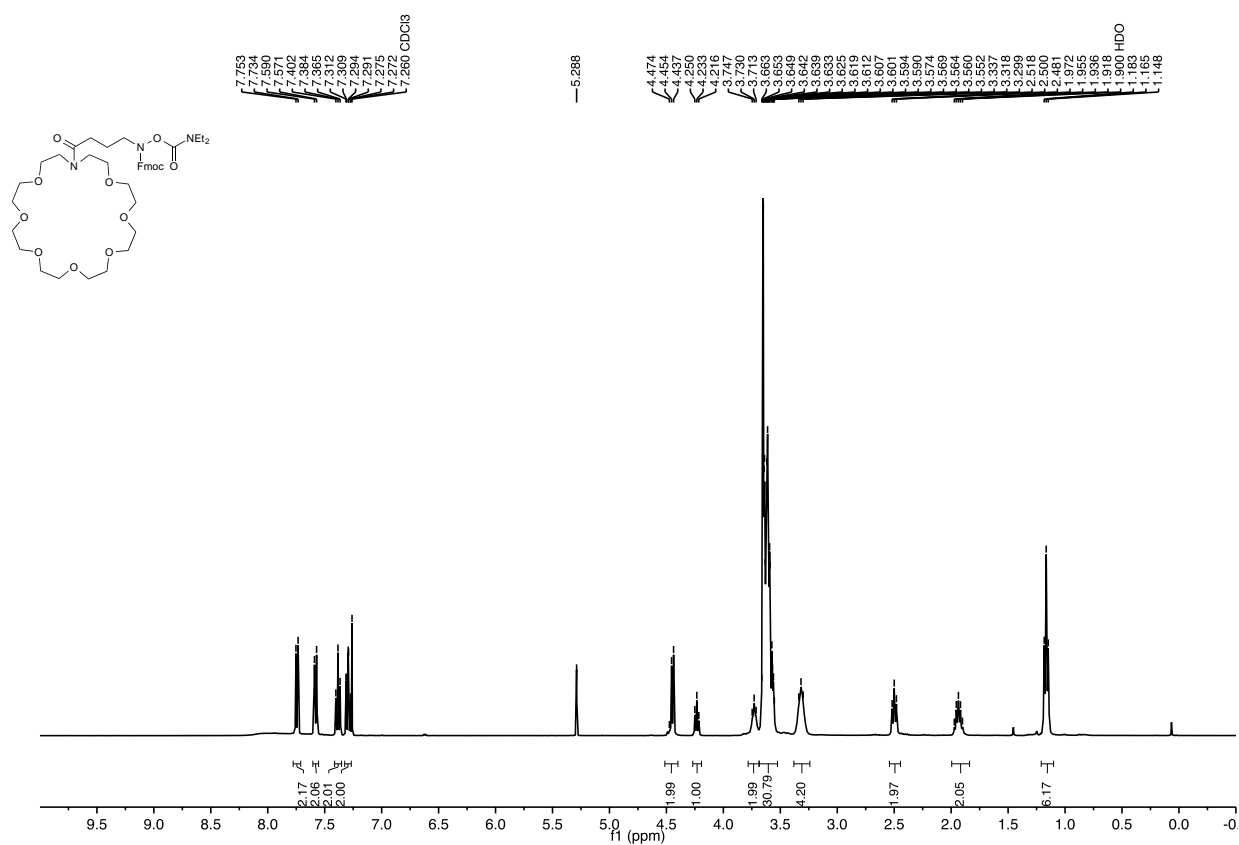 $^{13}\text{C}$  NMR (100 MHz,  $\text{CDCl}_3$ )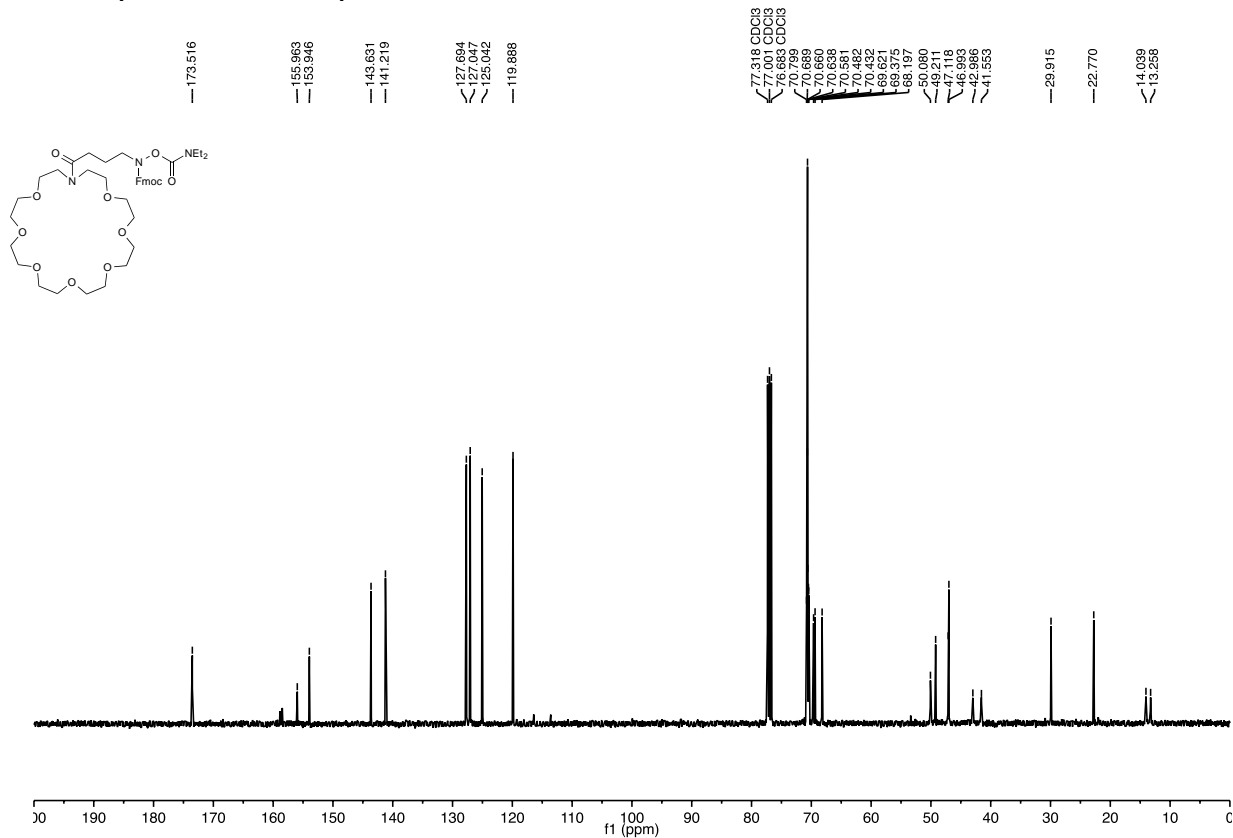

**[2]Rotaxane S31****<sup>1</sup>H NMR (600 MHz, CDCl<sub>3</sub>)**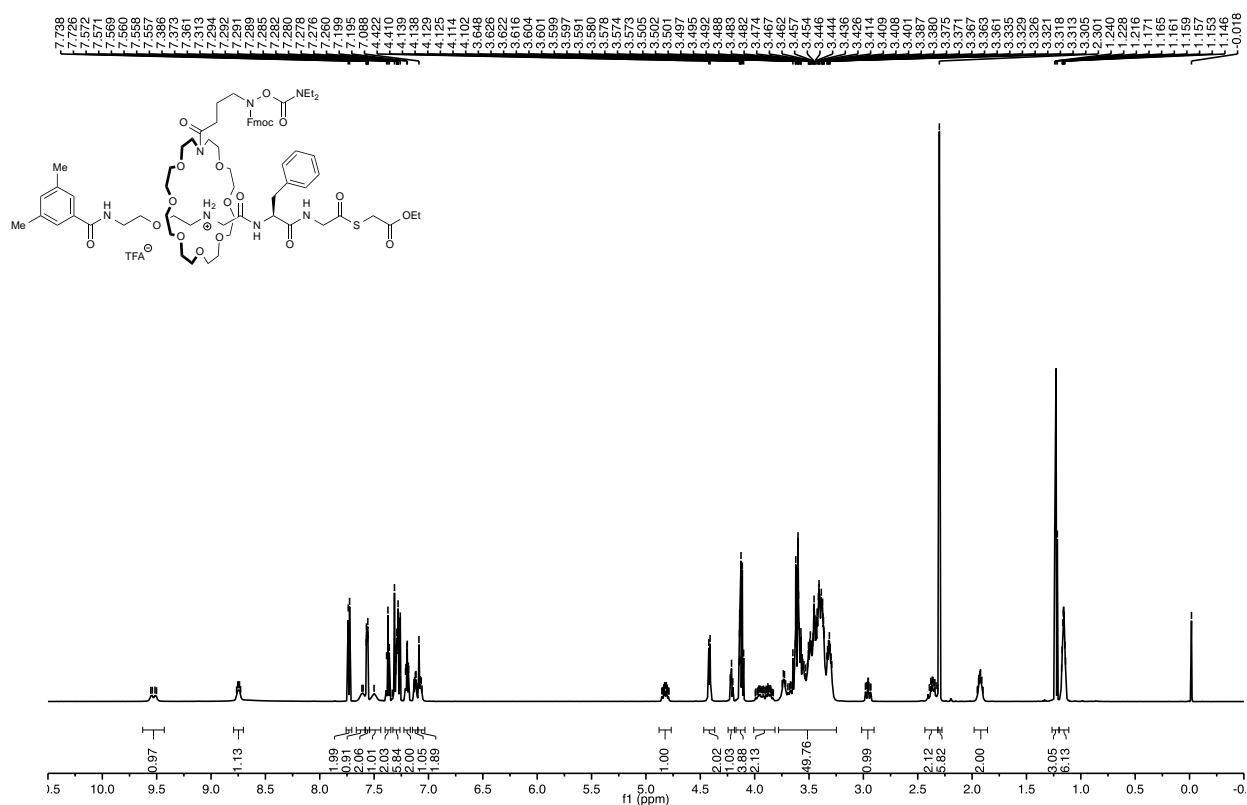**<sup>13</sup>C NMR (150 MHz, CDCl<sub>3</sub>)**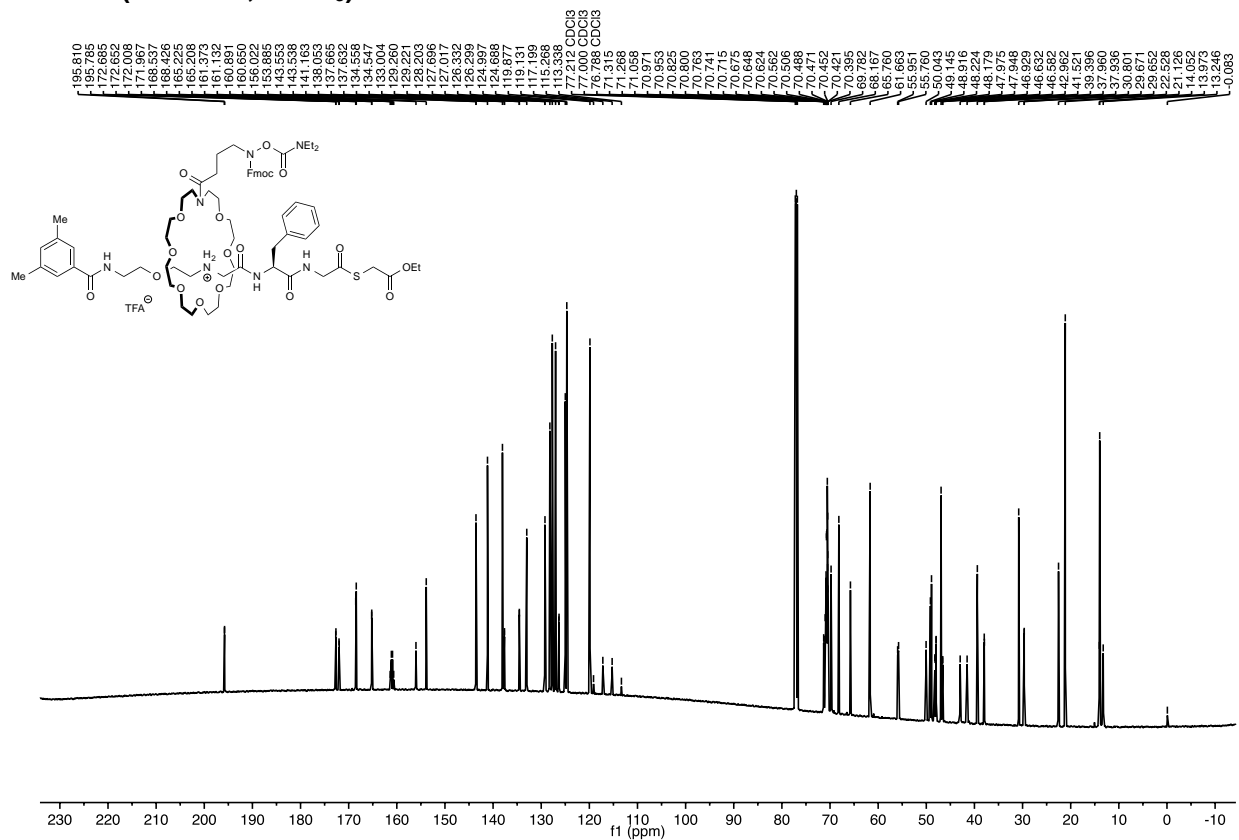

Peptide  $\alpha$ -ketoacid 7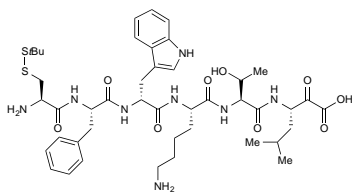

**Box 1:** Full scale spectra with internal reference peaks (ESI: Na-PFHA 408.9481, 794.9069, 1180.8657, 1566.8246); **Box 2:** Measured isotopic pattern of the product peak; **Box 3:** Calculated isotopic pattern of the product peak.

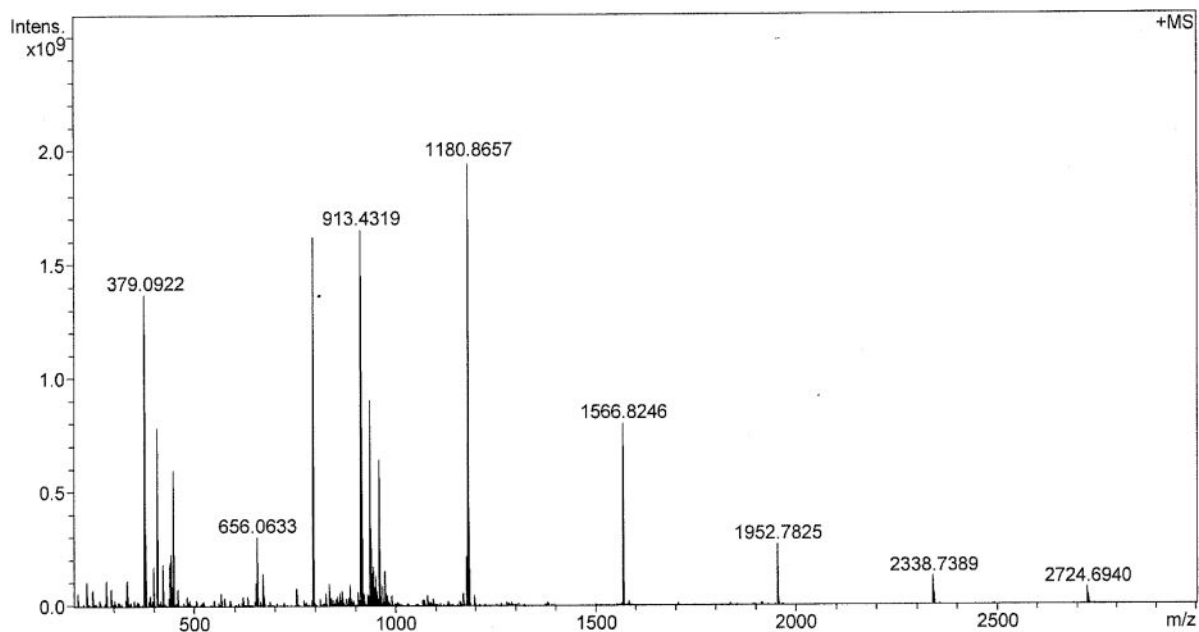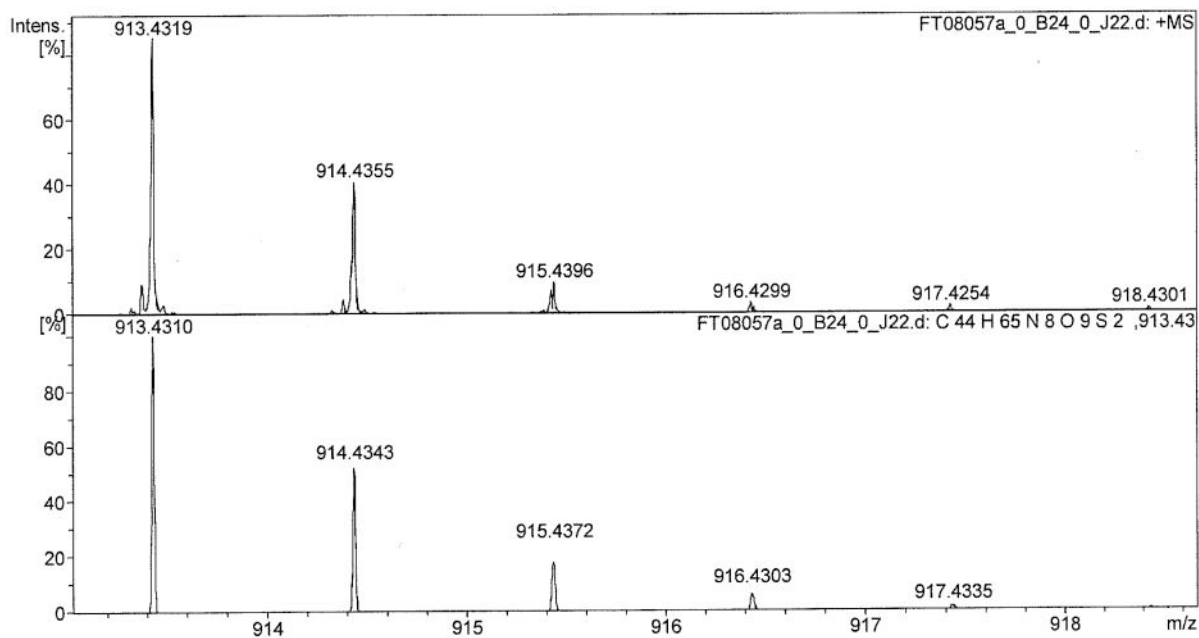

## Unprotected hydroxylamine 6

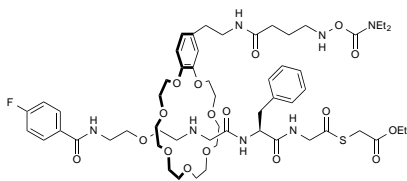

**Box 1:** Full scale spectra with internal reference peaks (ESI: Na-PFHA 408.9481, 794.9069, 1190.8657, 1566.8246); **Box 2:** Measured isotopic pattern of the product peak; **Box 3:** Calculated isotopic pattern of the product peak.

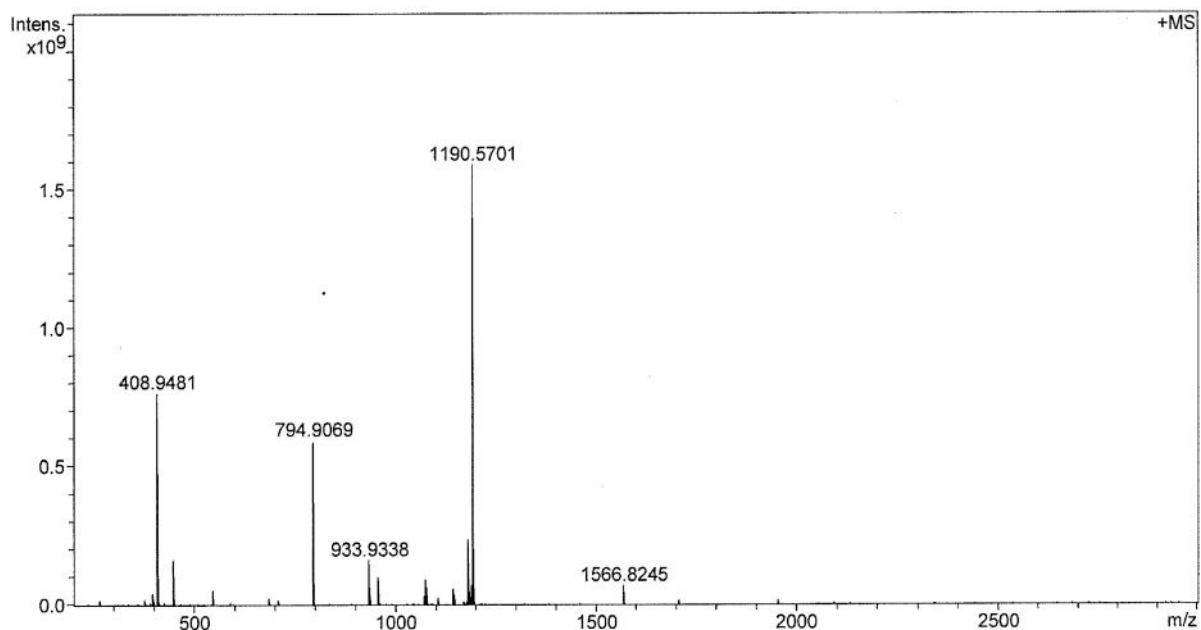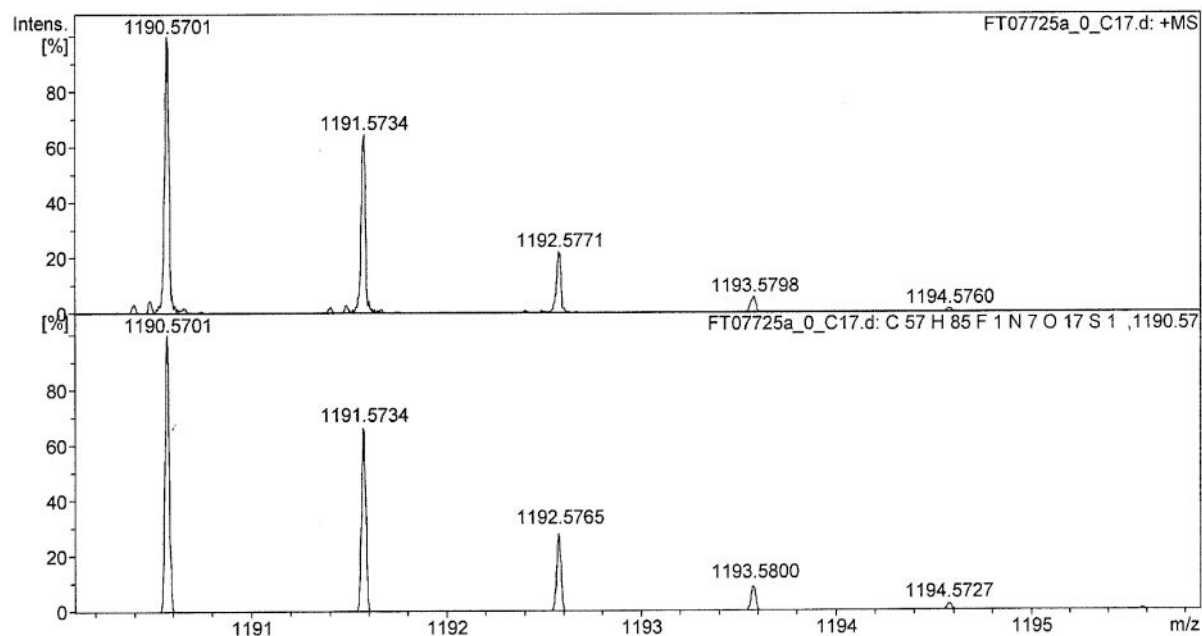

Peptido[2]rotaxane **8**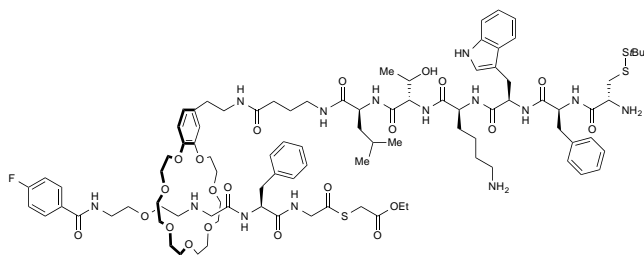

**Box 1:** Full scale spectra with internal reference peaks (ESI: Na-PFHA 1566.8246, 1952.7834, 2338.7423, 3110.6599); **Box 2:** Measured isotopic pattern of the product peak; **Box 3:** Calculated isotopic pattern of the product peak.

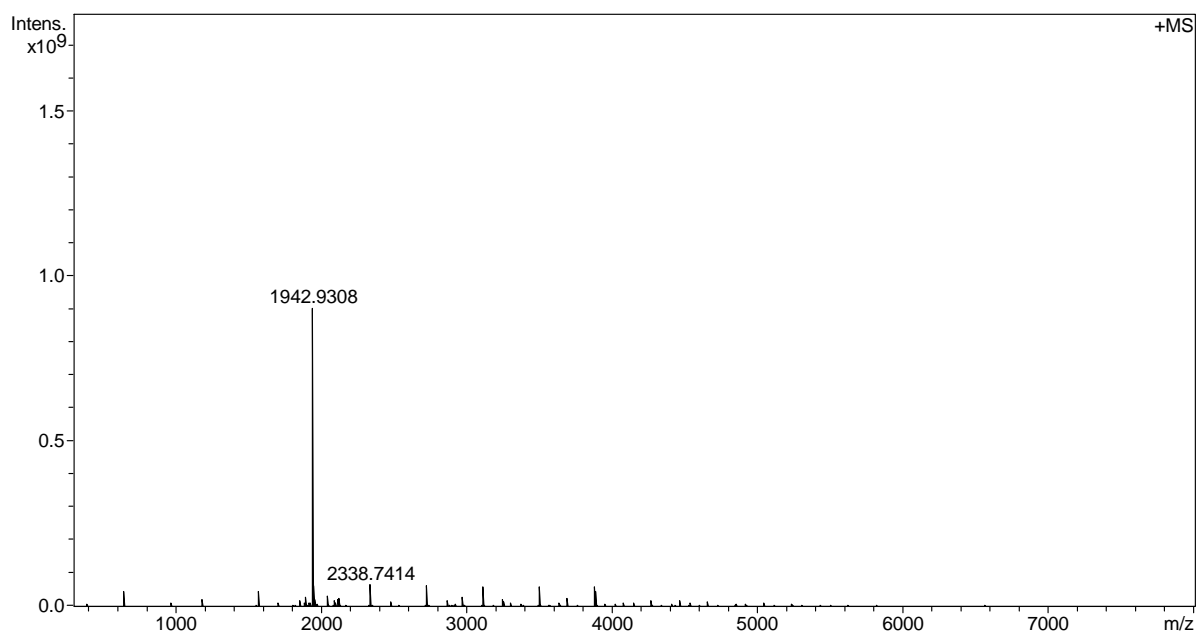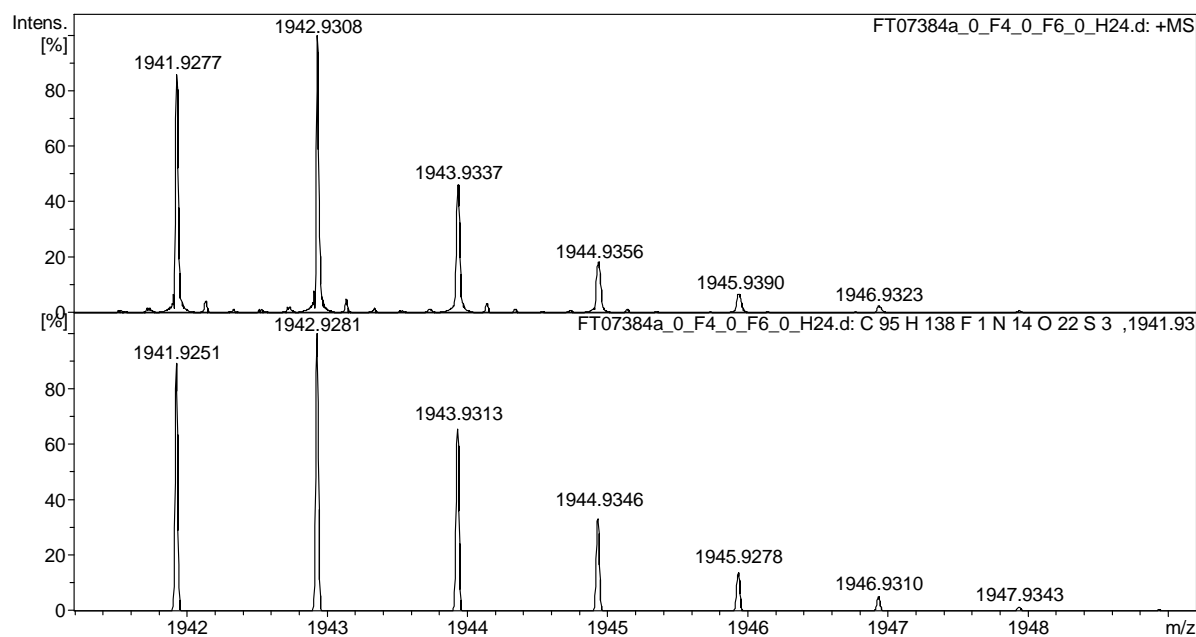



## Lasso peptide 9

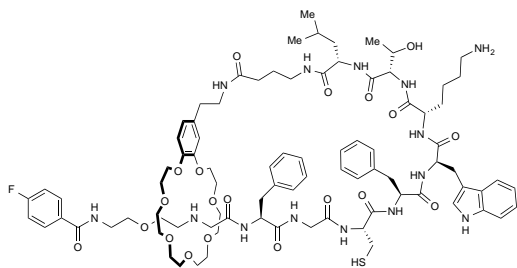

**Box 1:** Full scale spectra with internal reference peaks (ESI: Na-PFHA 408.9481, 794.9069, 1180.8657, 1566.8246, 1952.7834); **Box 2:** Measured isotopic pattern of the product peak; **Box 3:** Calculated isotopic pattern of the product peak.

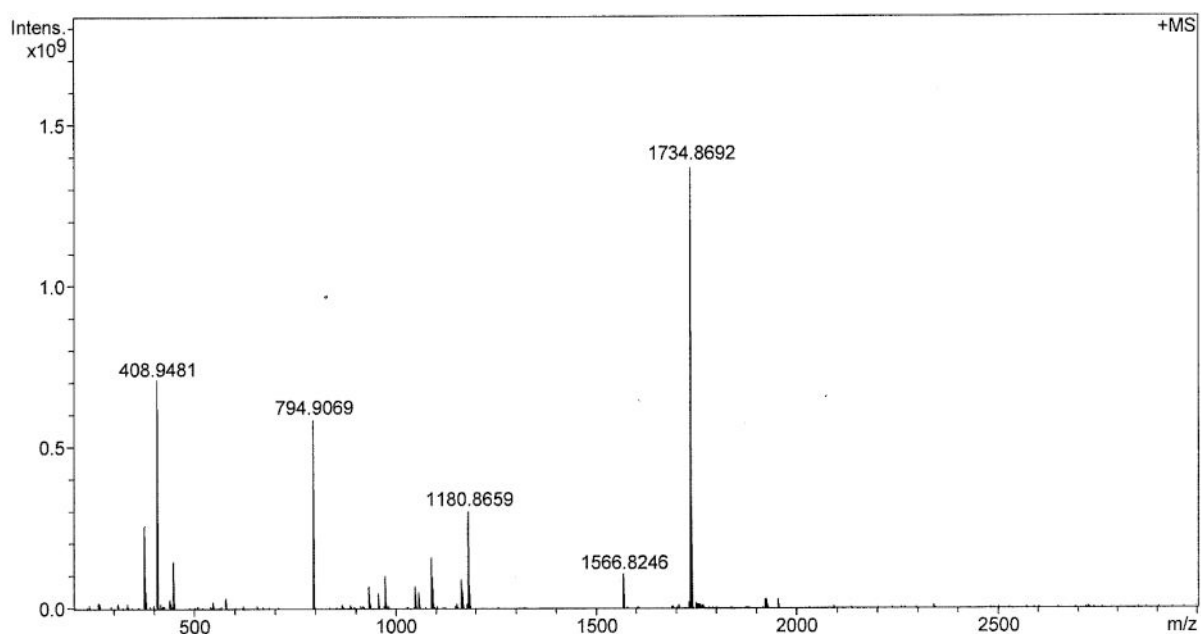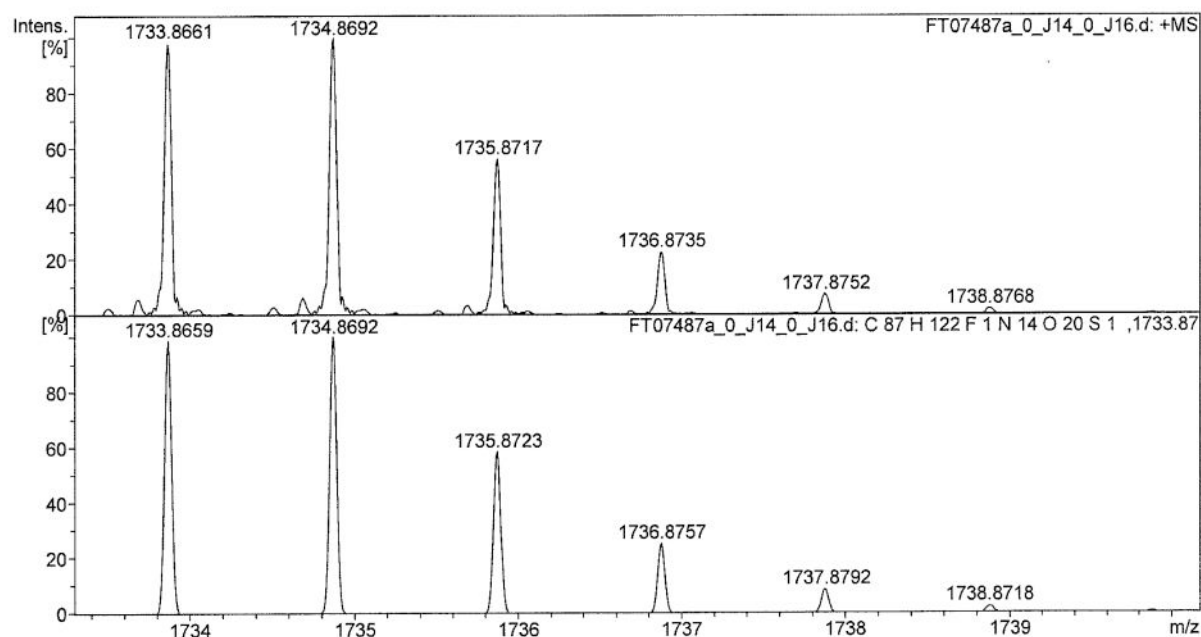

**Cys-alkylated lasso peptide L1**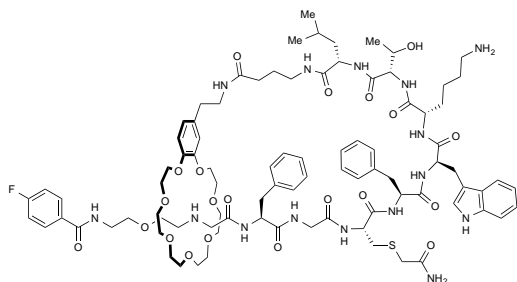

**Box 1:** Full scale spectra with internal reference peaks (ESI: Na-PFHA 408.9481, 794.9069, 1180.8657, 1566.8246, 1952.7834); **Box 2:** Measured isotopic pattern of the product peak; **Box 3:** Calculated isotopic pattern of the product peak.

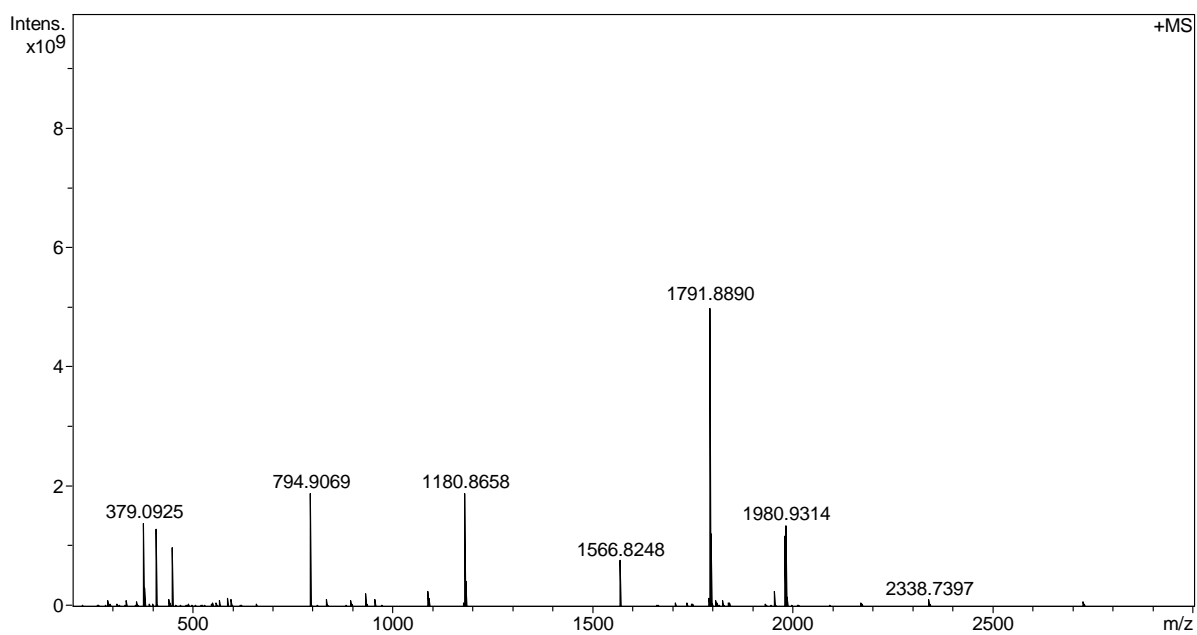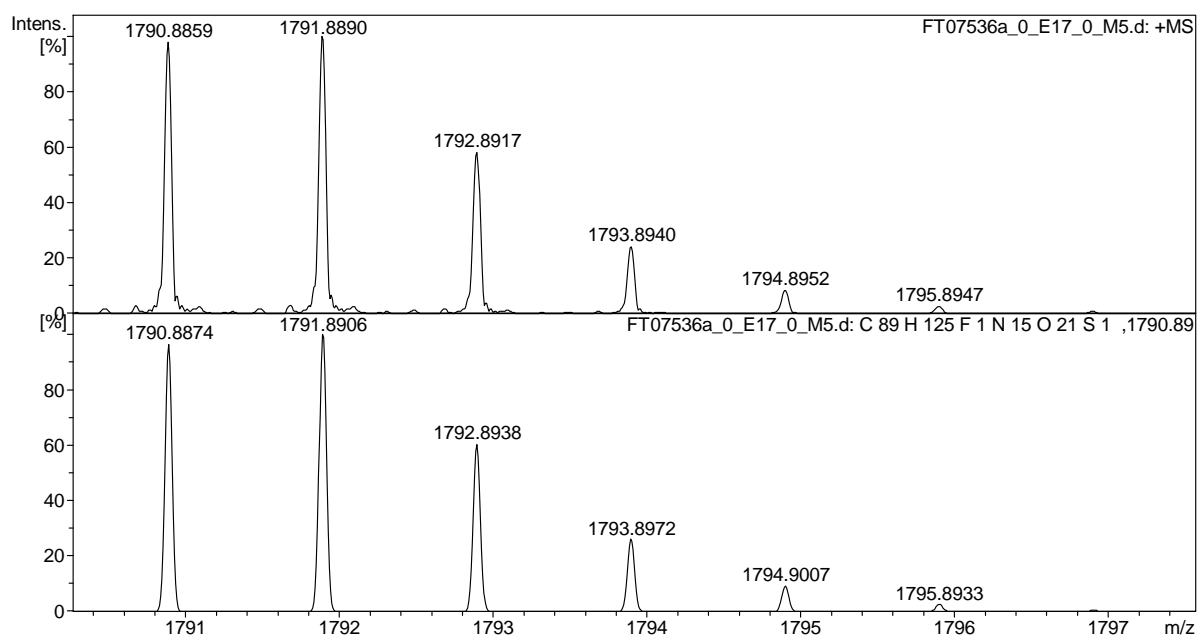



## KAHA ligation product S19

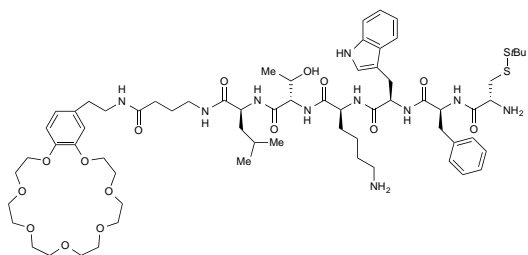

**Box 1:** Full scale spectra with internal reference peaks (ESI: Na-PFHA 408.9481, 794.9069, 1180.8657, 1566.8246); **Box 2:** Measured isotopic pattern of the product peak; **Box 3:** Calculated isotopic pattern of the product peak.

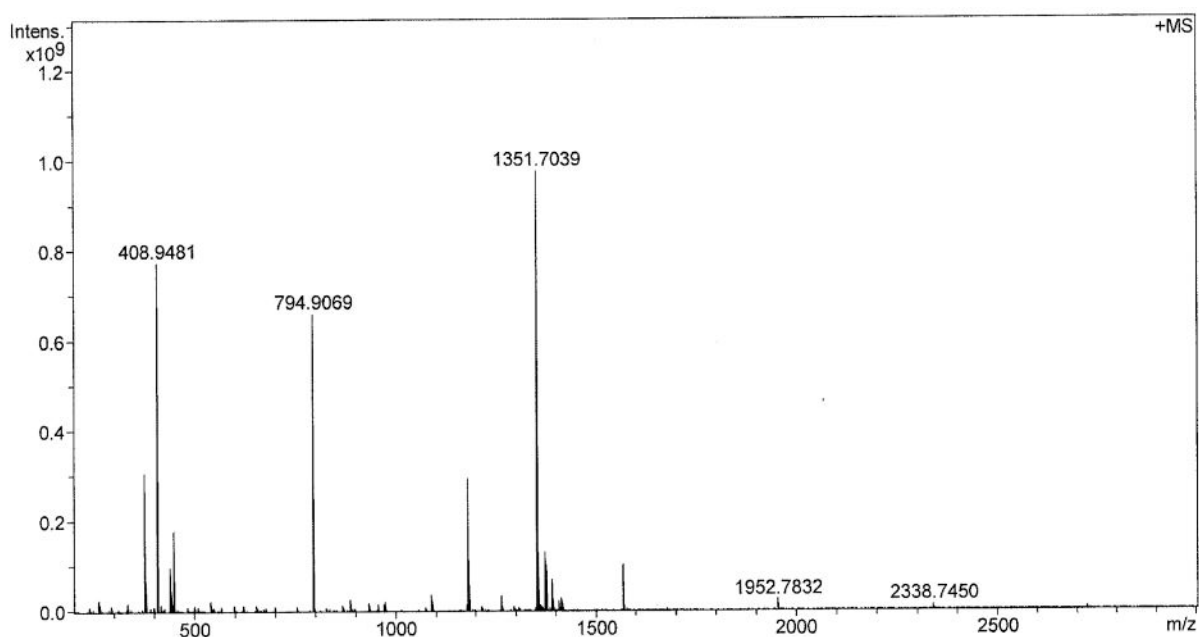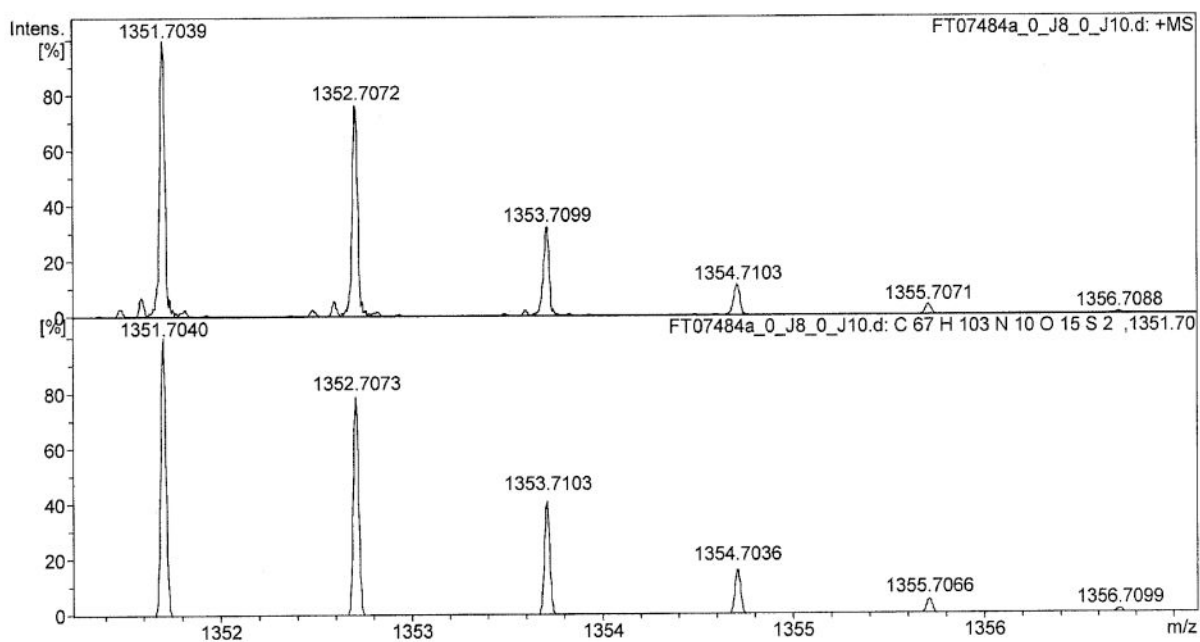

## NCL product S20

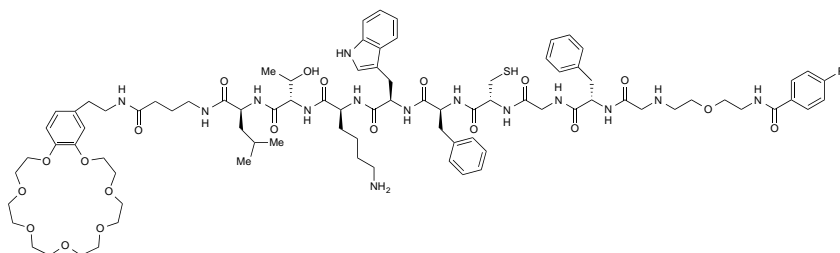

**Box 1:** Full scale spectra with internal reference peaks (ESI: Na-PFHA 408.9481, 794.9069, 1180.8657, 1566.8246, 1952.7834); **Box 2:** Measured isotopic pattern of the product peak; **Box 3:** Calculated isotopic pattern of the product peak.

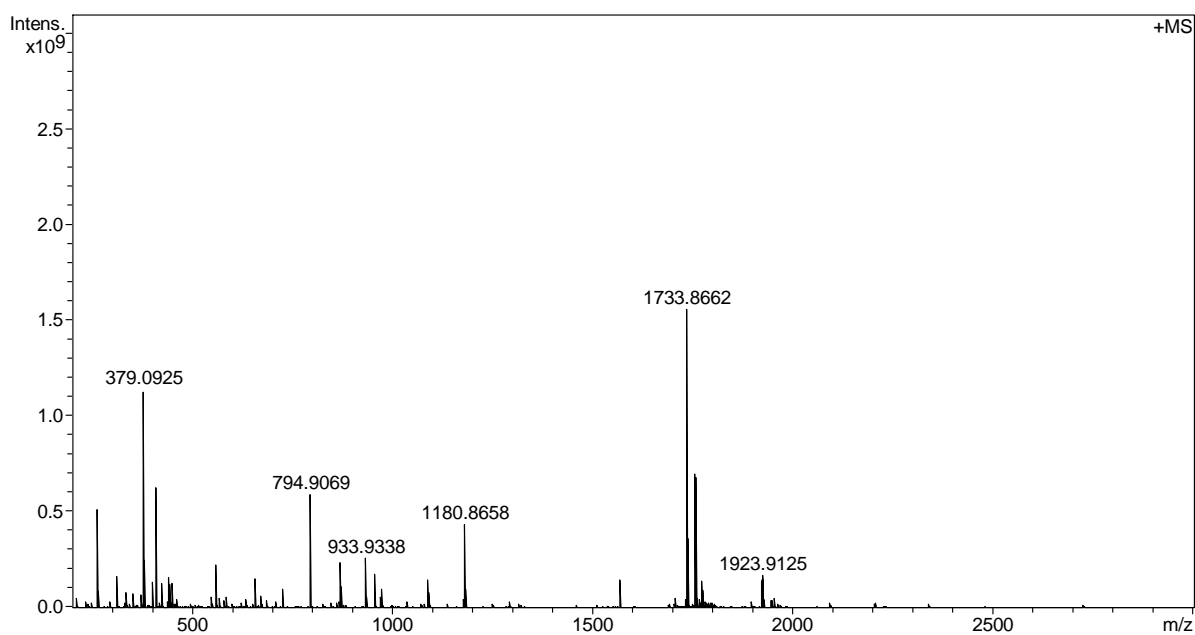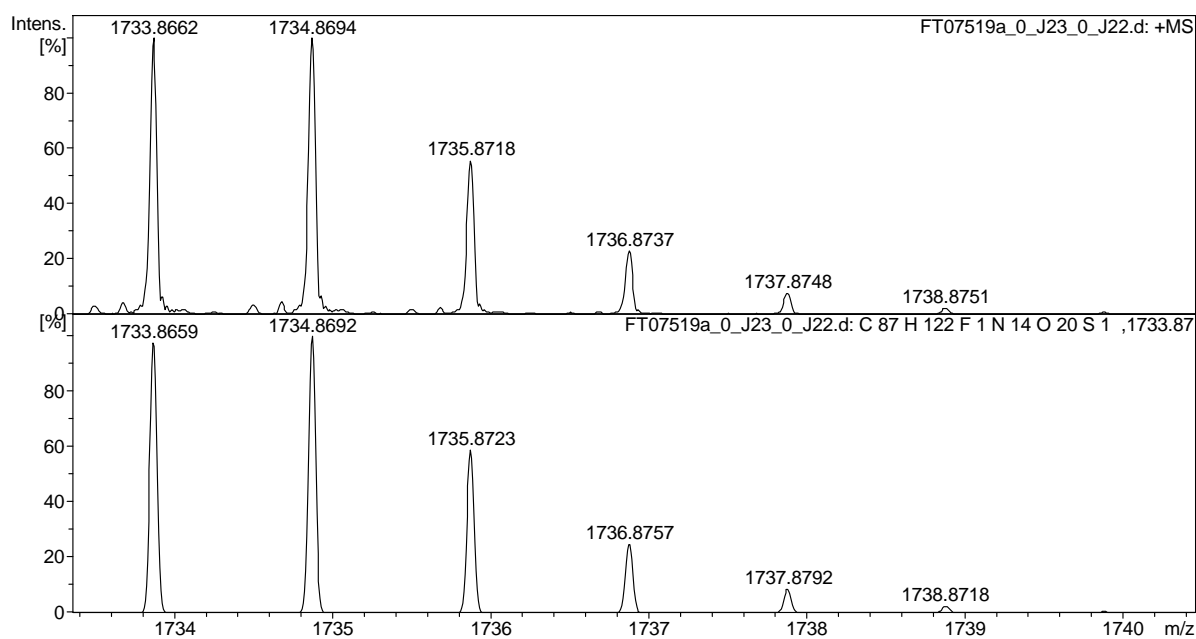



**[2]Rotaxane S25**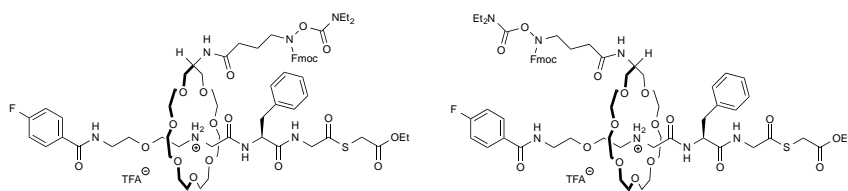

**Box 1:** Full scale spectra with internal reference peaks (ESI: Na-PFHA 408.9481, 794.9069, 1180.8657, 1566.8246); **Box 2:** Measured isotopic pattern of the product peak; **Box 3:** Calculated isotopic pattern of the product peak.

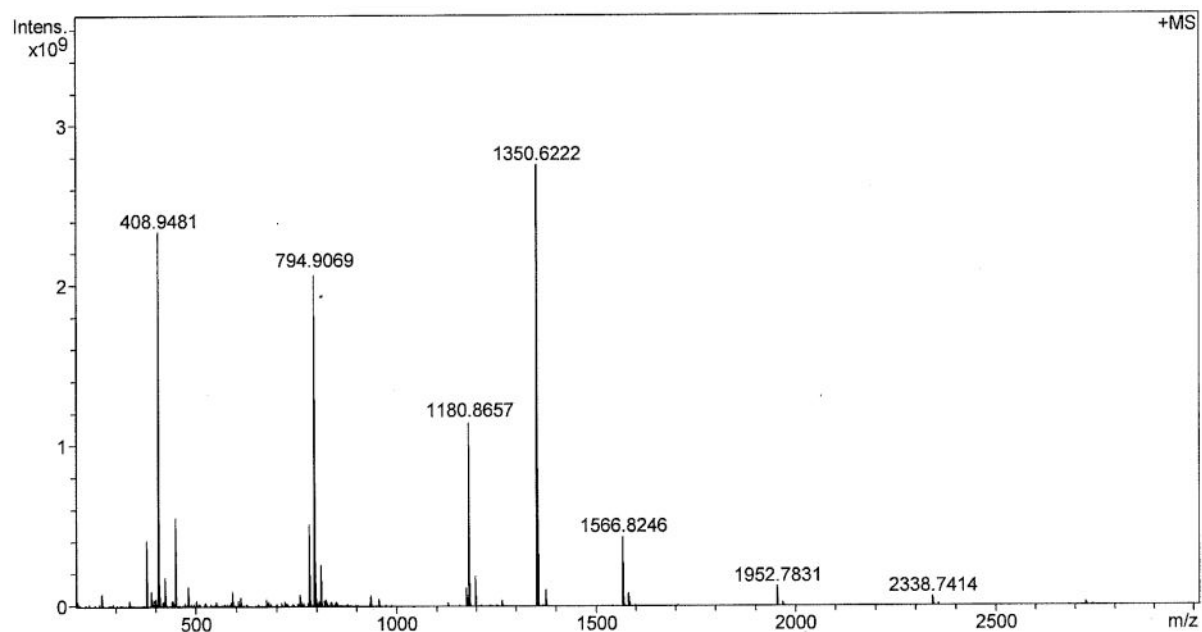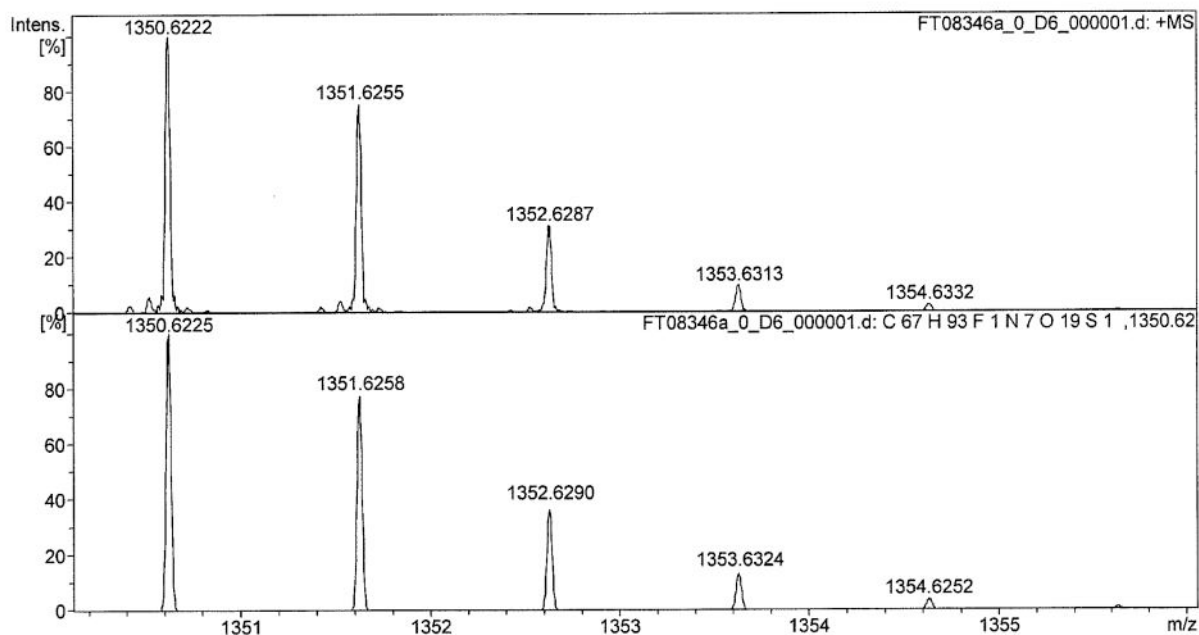

## Peptido[2]rotaxane S26

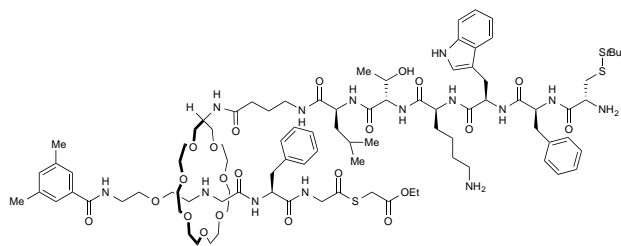

**Box 1:** Full scale spectra with internal reference peaks (ESI: Na-PFHA 794.9069, 1180.8657, 1566.8246, 1952.7834, 2338.7423, 2724.7011); **Box 2:** Measured isotopic pattern of the product peak; **Box 3:** Calculated isotopic pattern of the product peak.

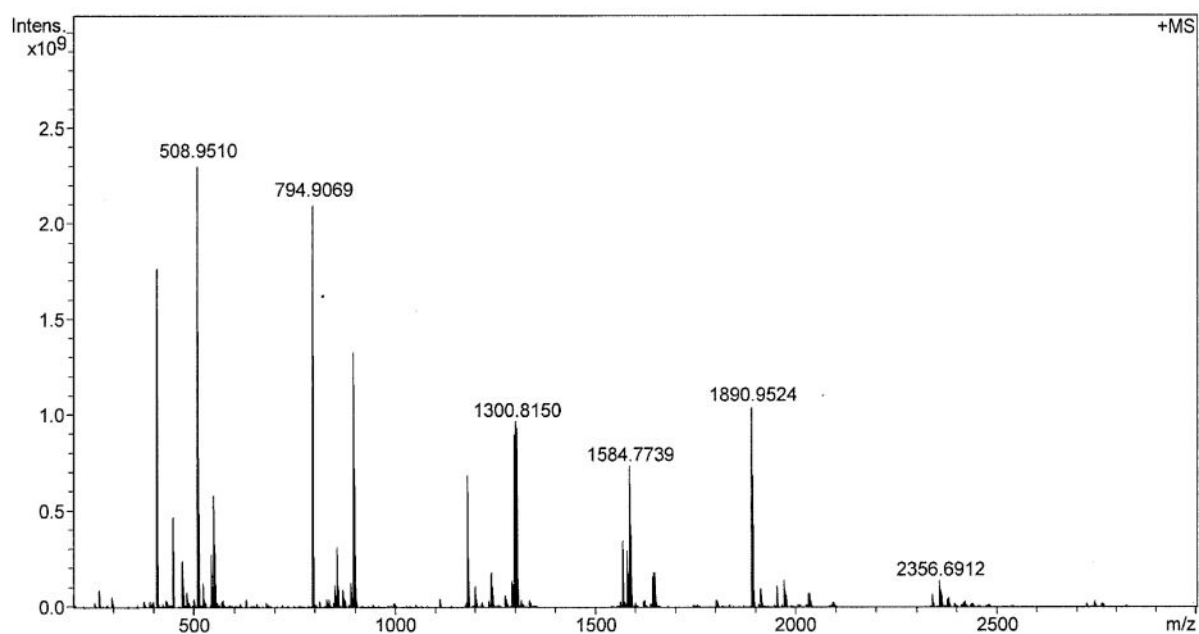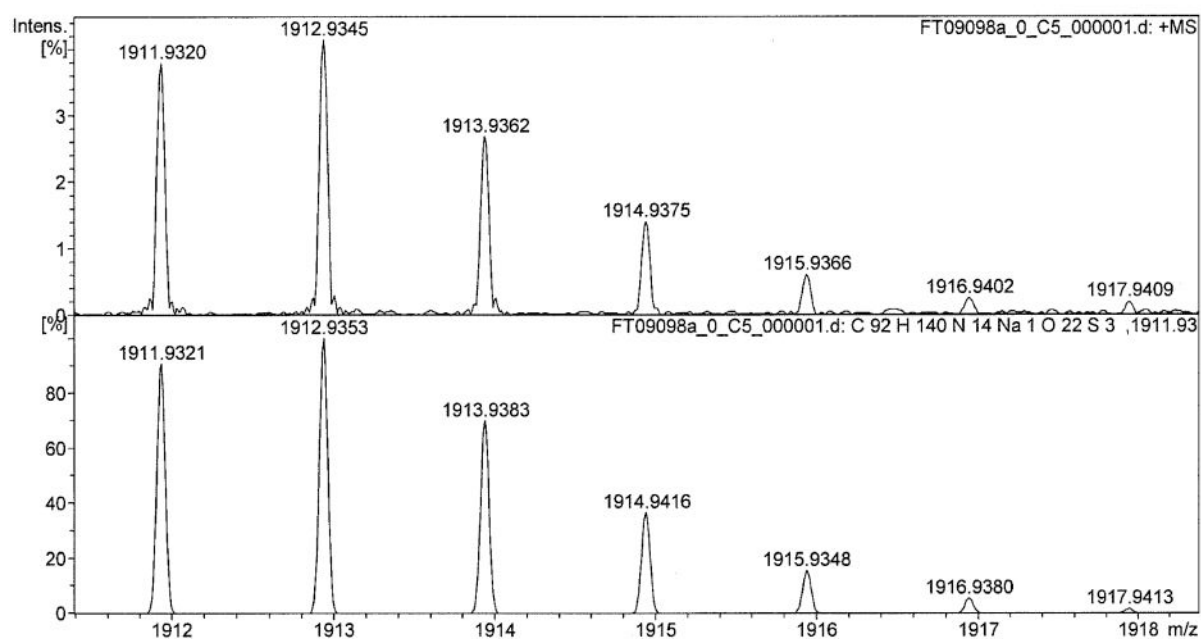



## Lasso peptide S27

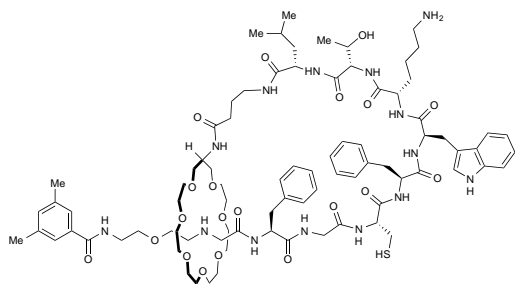

**Box 1:** Full scale spectra with internal reference peaks (ESI: Na-PFHA 408.9481, 794.9069, 1180.8657, 1566.8246, 1952.7834); **Box 2:** Measured isotopic pattern of the product peak; **Box 3:** Calculated isotopic pattern of the product peak.

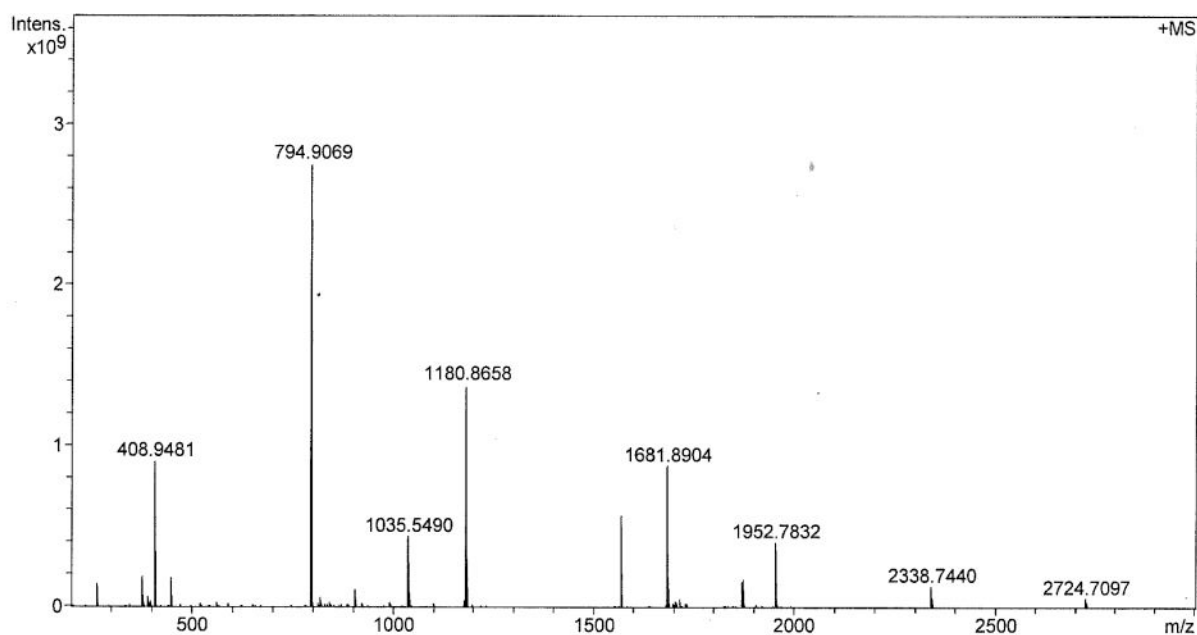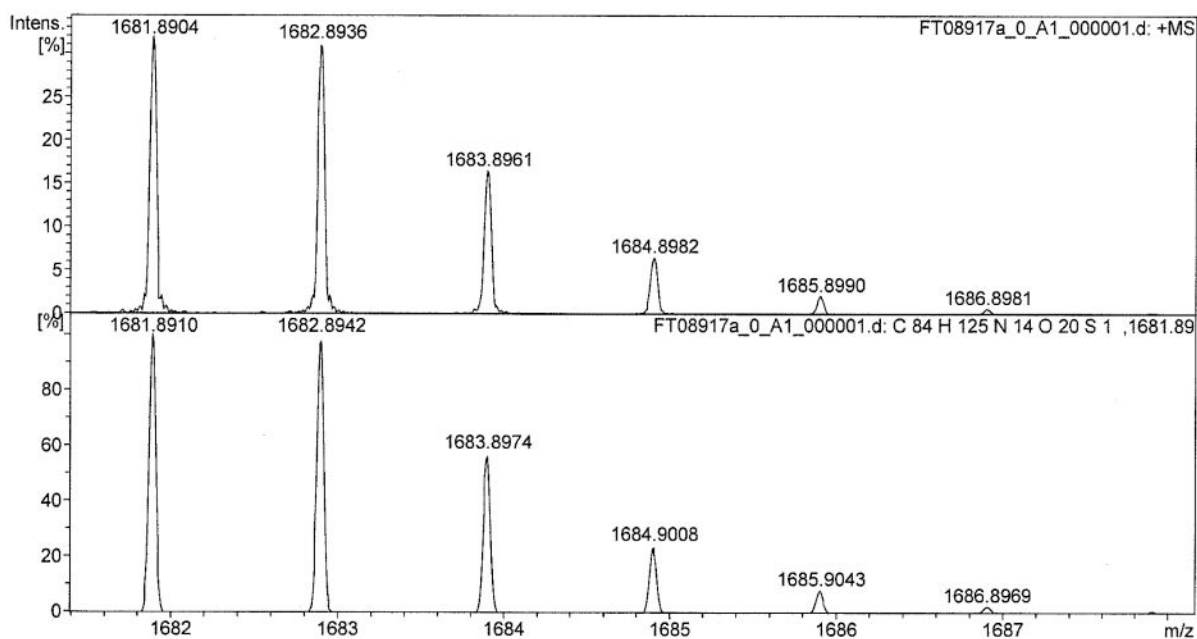

**Cys-alkylated lasso peptide L2**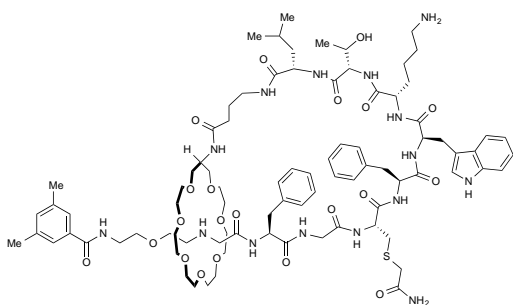

**Box 1:** Full scale spectra with internal reference peaks (ESI: Na-PFHA 408.9481, 794.9069, 1180.8657, 1566.8246, 1952.7834, 2338.7423); **Box 2:** Measured isotopic pattern of the product peak; **Box 3:** Calculated isotopic pattern of the product peak.

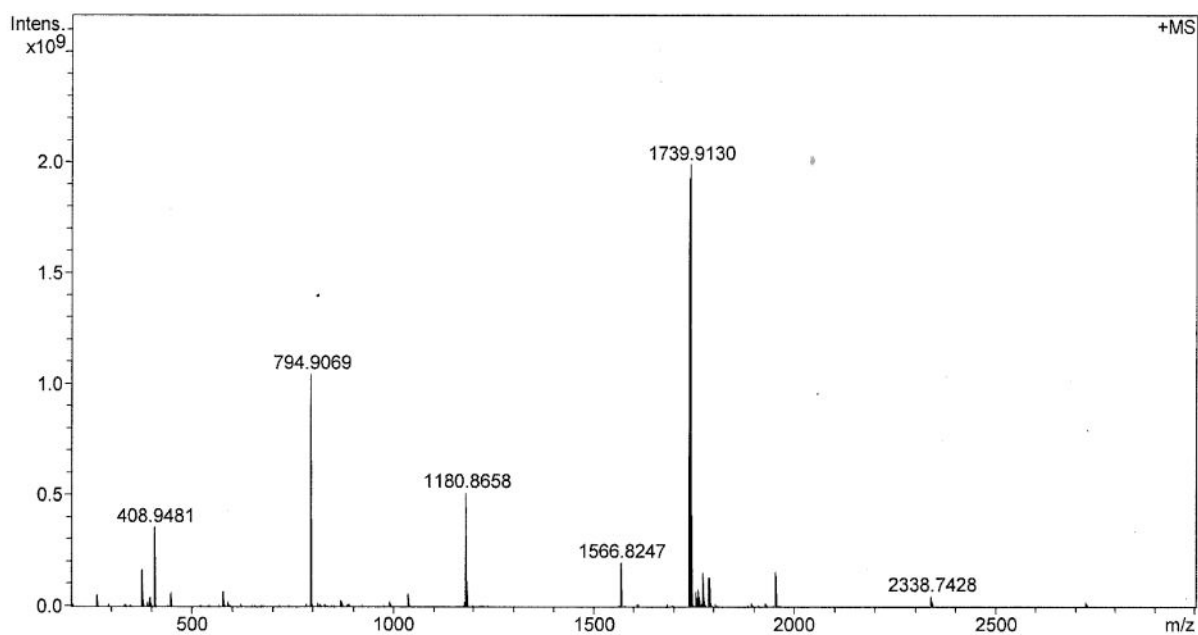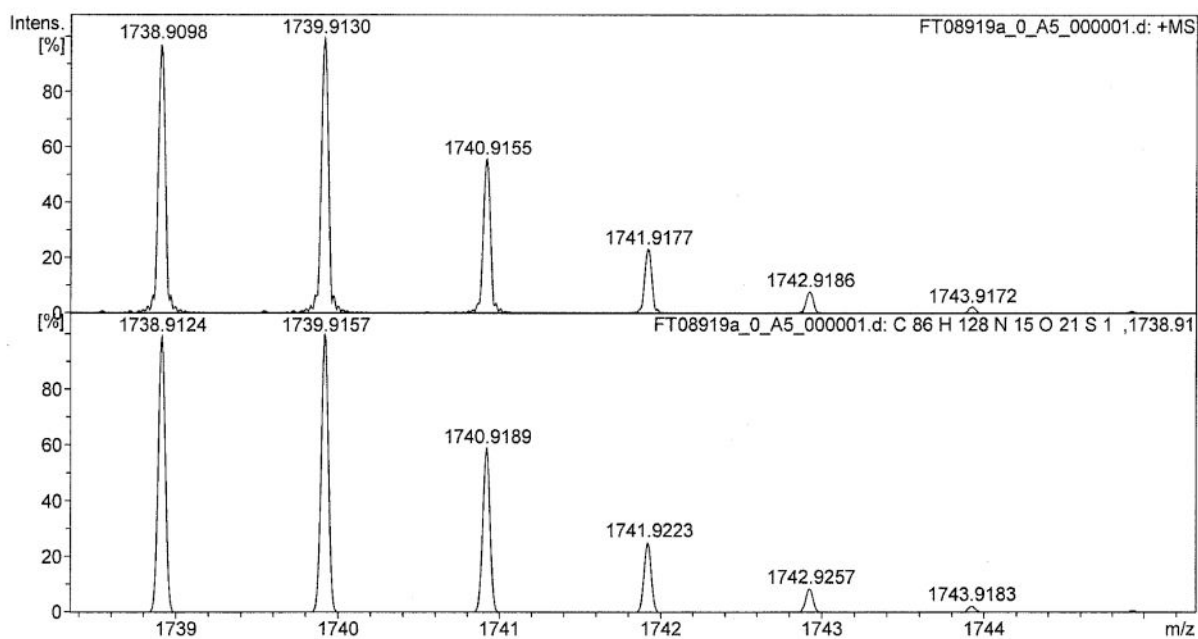

## KAHA ligation product S28

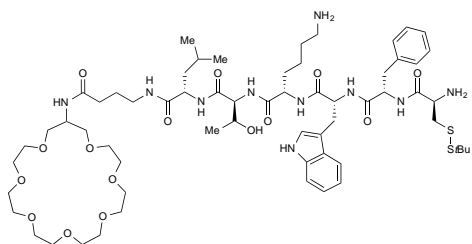

**Box 1:** Full scale spectra with internal reference peaks (ESI: Tuning Mix ES-TOF (ESI) (pos)DCTB 322.0481, 622.0290, 1221.9906, 1521.9715, 2421.9140); **Box 2:** Measured isotopic pattern of the product peak; **Box 3:** Calculated isotopic pattern of the product peak.

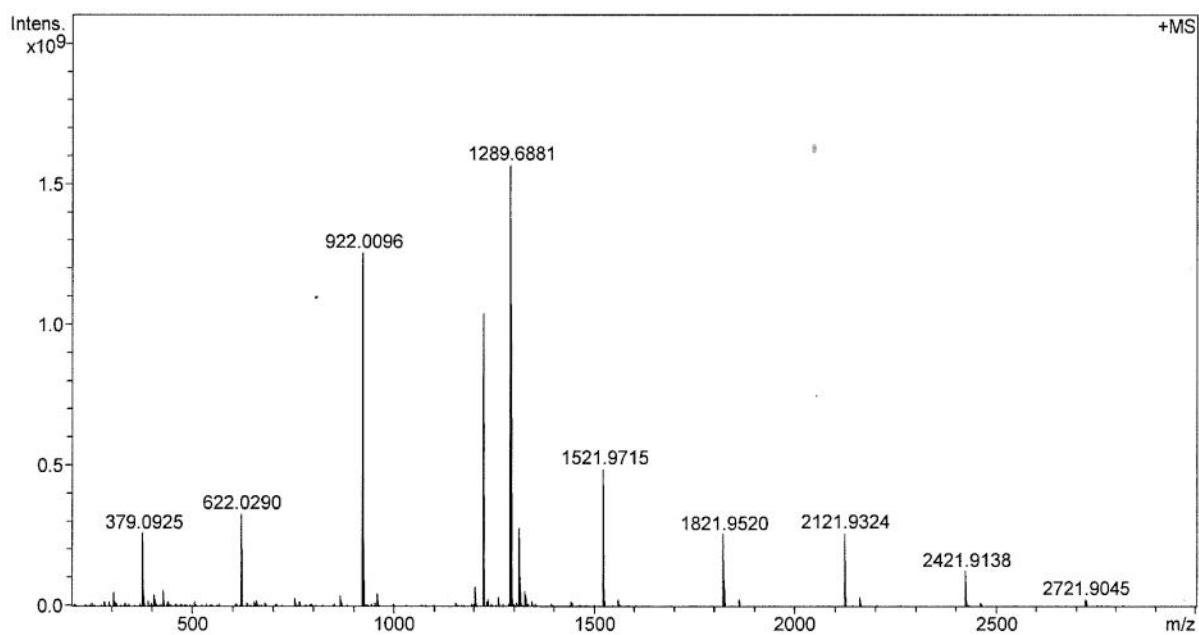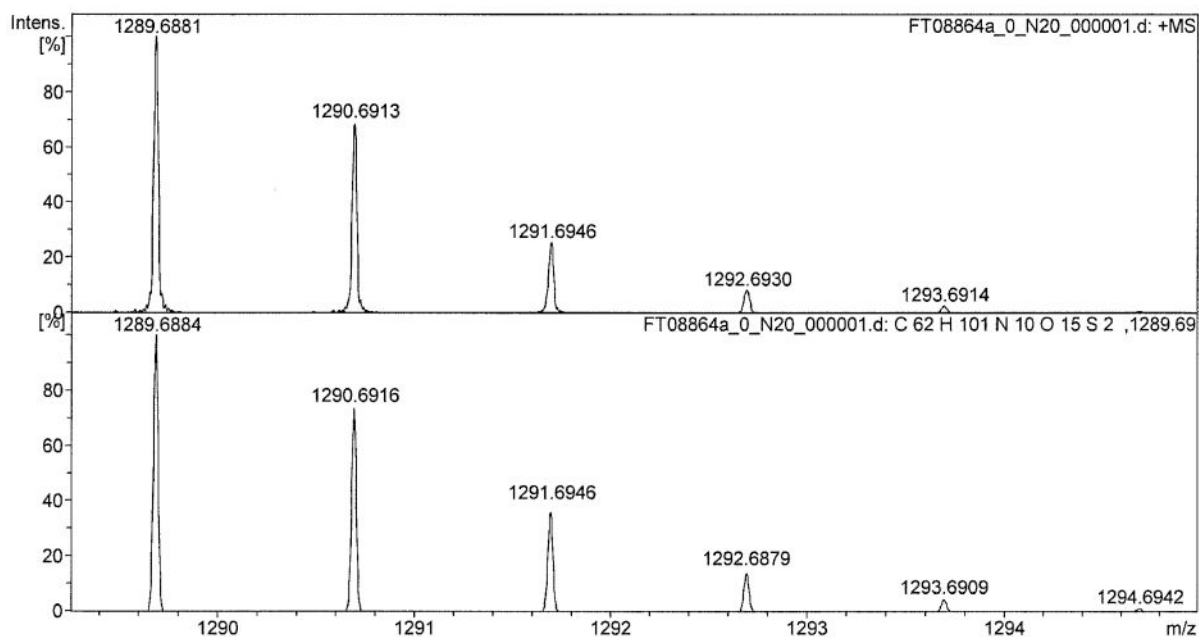



**Branched-cyclic peptide B2**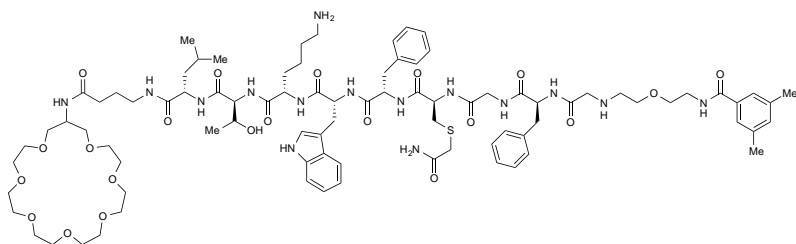

**Box 1:** Full scale spectra with internal reference peaks (ESI: Tuning Mix ES-TOF (ESI) (pos)DCTB 622.0290, 922.0098, 1221.9906, 1521.9715, 2421.9140); **Box 2:** Measured isotopic pattern of the product peak; **Box 3:** Calculated isotopic pattern of the product peak.

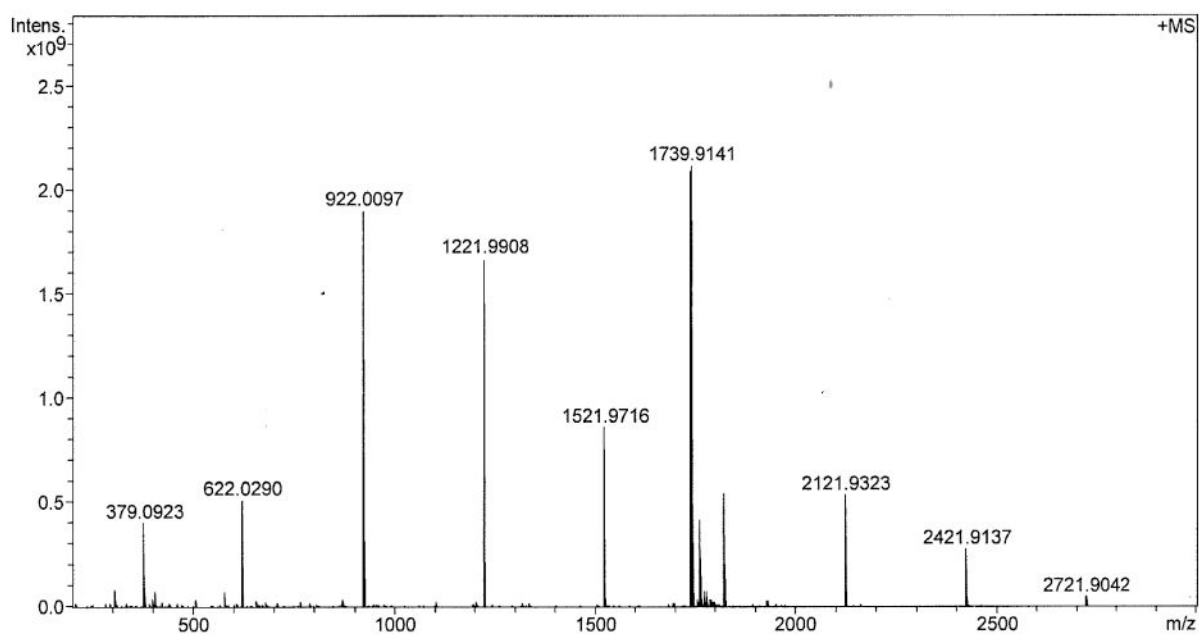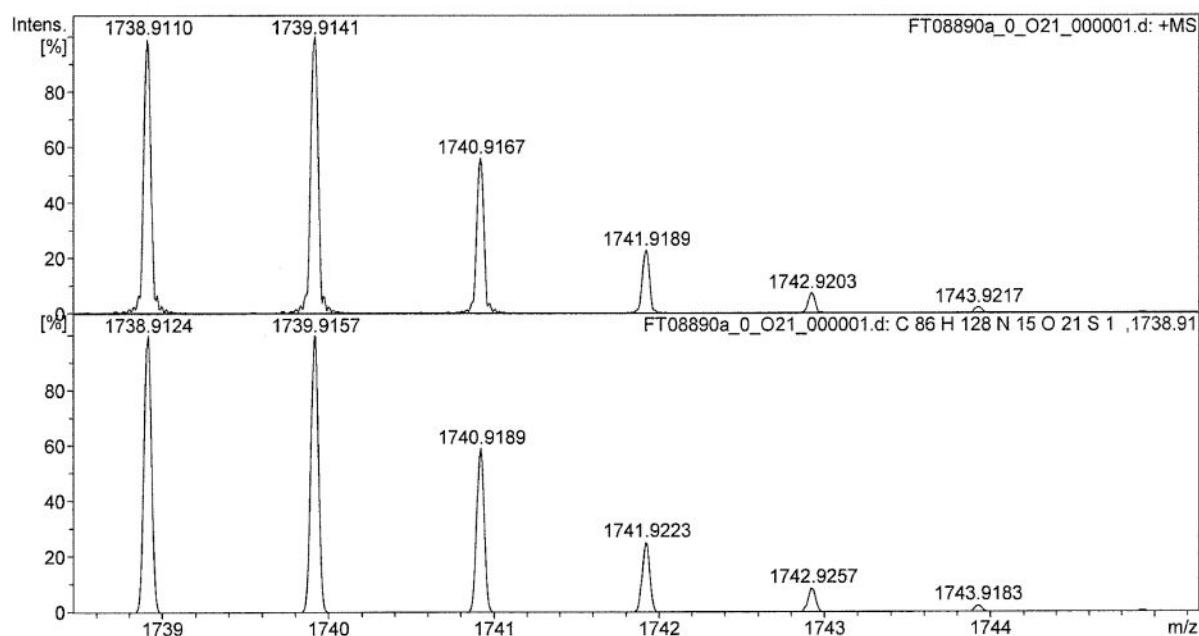

## Peptido[2]rotaxane S31

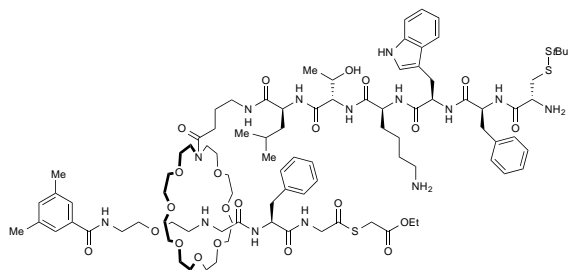

**Box 1:** Full scale spectra with internal reference peaks (ESI: Na-PFHA 408.9481, 794.9069, 1180.8657, 1566.8246, 2338.7423); **Box 2:** Measured isotopic pattern of the product peak; **Box 3:** Calculated isotopic pattern of the product peak.

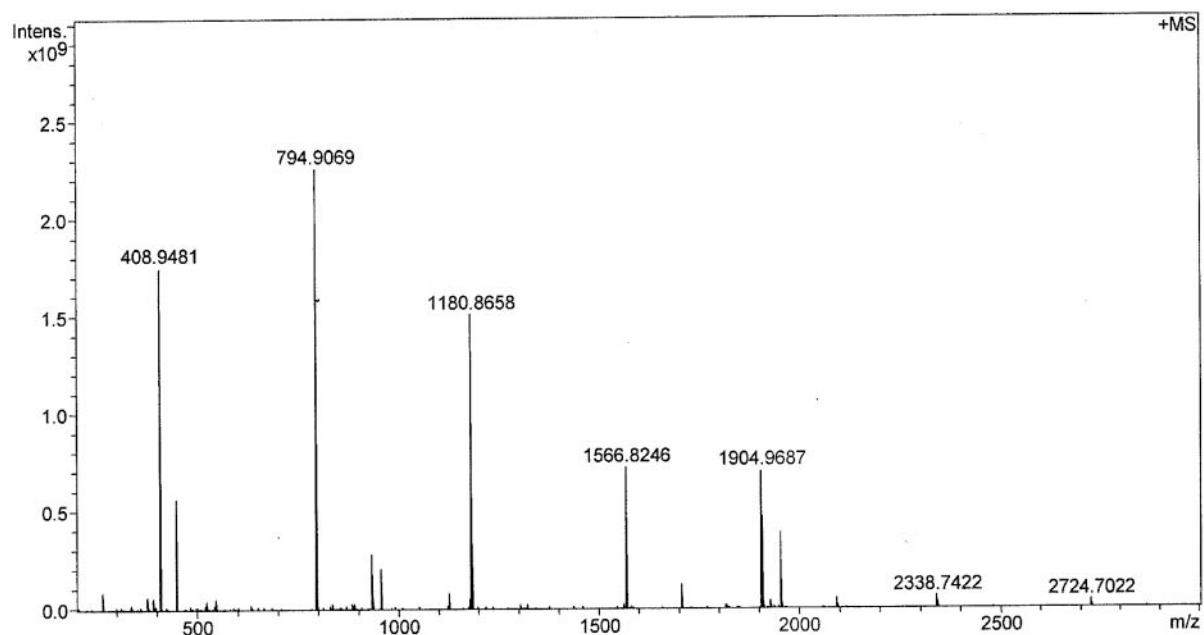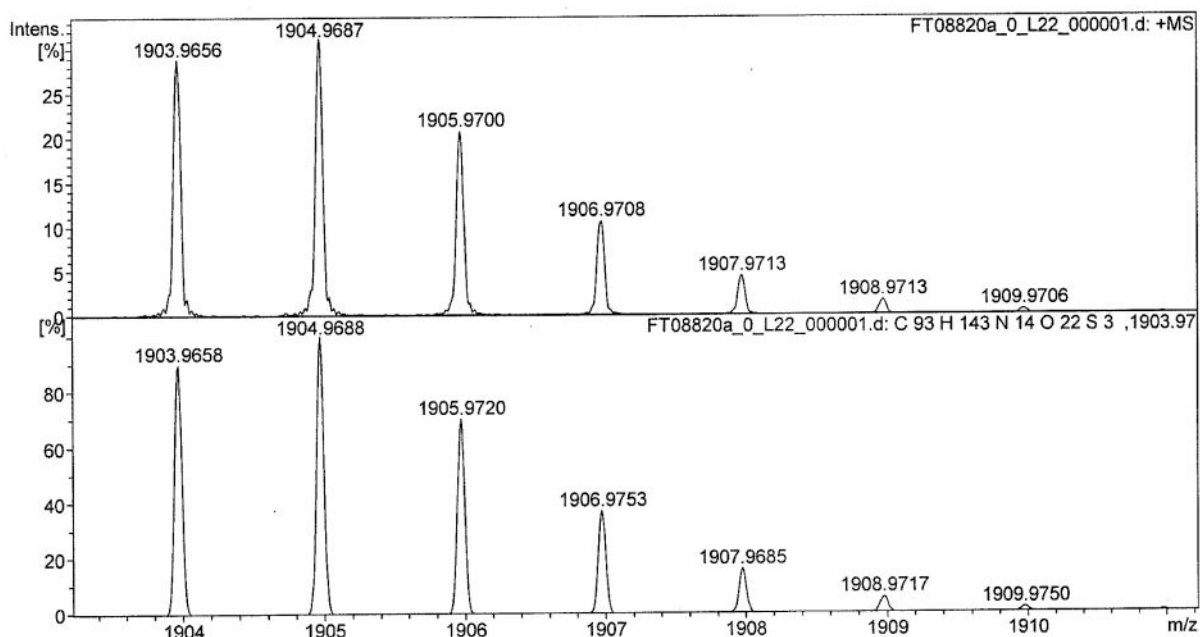

## Lasso peptide S32

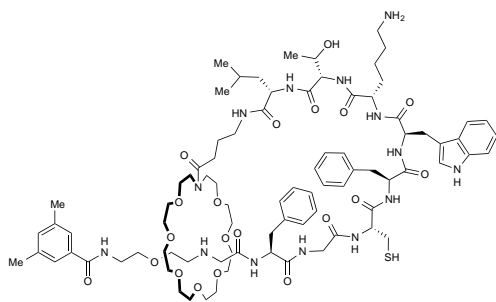

**Box 1:** Full scale spectra with internal reference peaks (ESI: Tuning Mix ES-TOF (ESI) (pos)DCTB 322.0481, 622.0290, 922.0098, 1221.9906, 1821.9523, 2421.9140); **Box 2:** Measured isotopic pattern of the product peak; **Box 3:** Calculated isotopic pattern of the product peak.

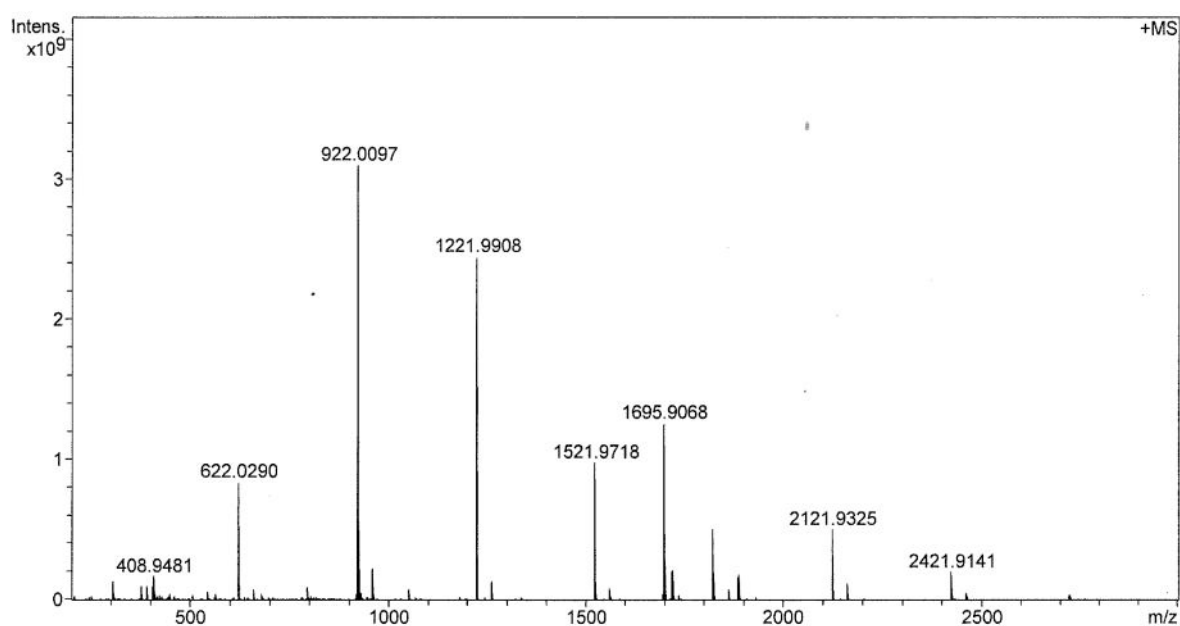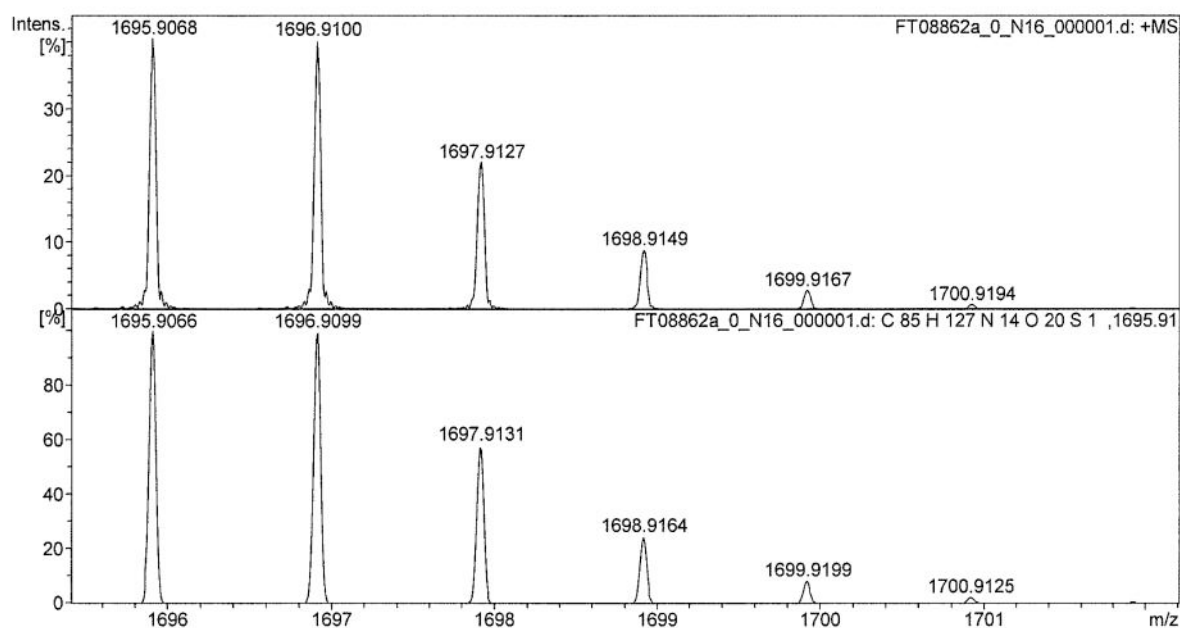

## Cys-alkylated lasso peptide L3

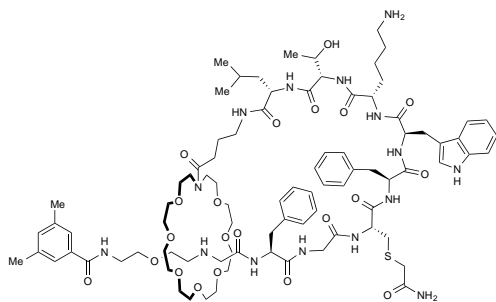

**Box 1:** Full scale spectra with internal reference peaks (ESI: Na-PFHA 408.9481, 794.9069, 1180.8657, 1952.7834, 2338.7423); **Box 2:** Measured isotopic pattern of the product peak; **Box 3:** Calculated isotopic pattern of the product peak.

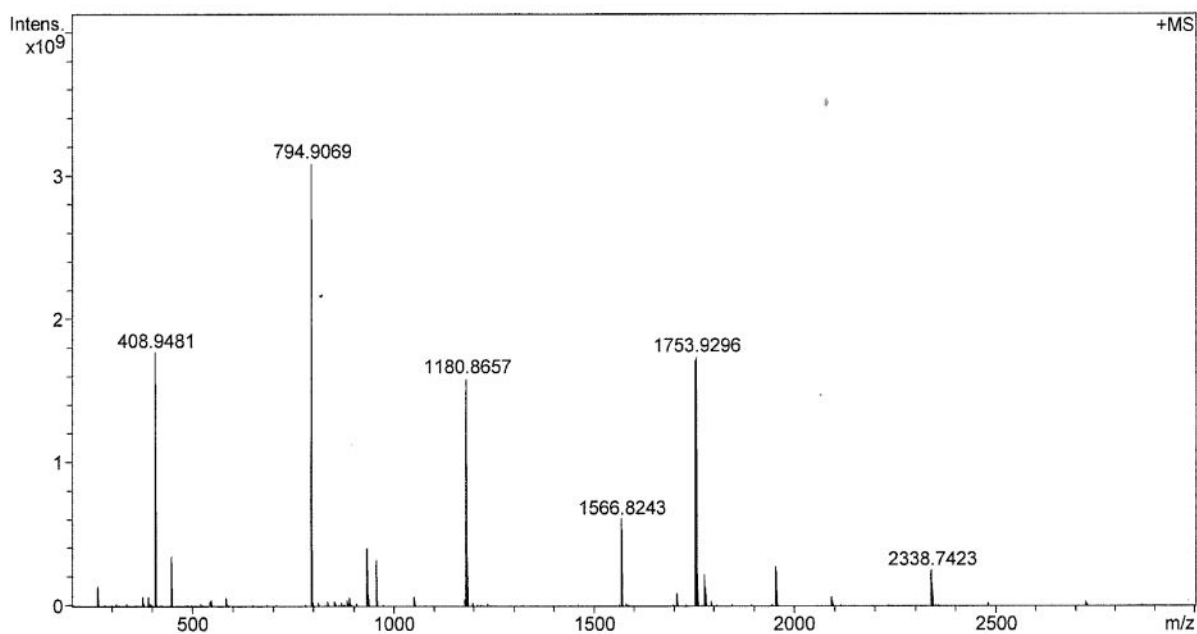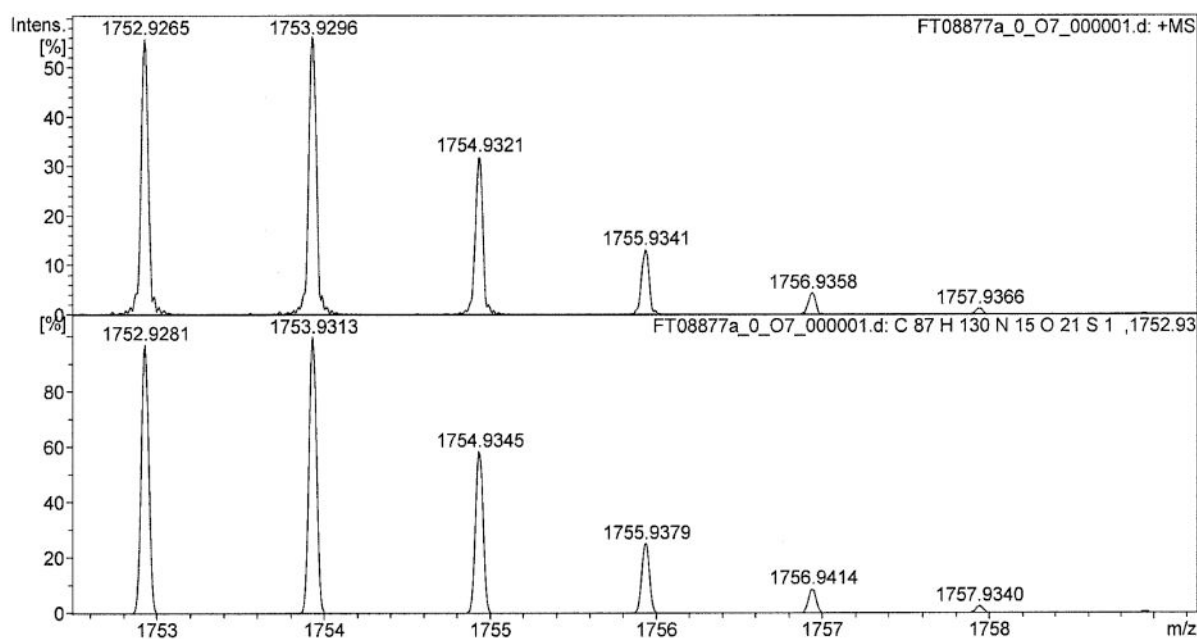



## KAHA ligation product S33

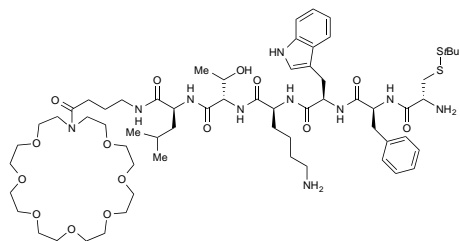

**Box 1:** Full scale spectra with internal reference peaks (ESI: Tuning Mix ES-TOF (ESI) (pos)DCTB 322.0481, 622.0290, 1221.9906, 1821.9523, 2421.9140); **Box 2:** Measured isotopic pattern of the product peak; **Box 3:** Calculated isotopic pattern of the product peak.

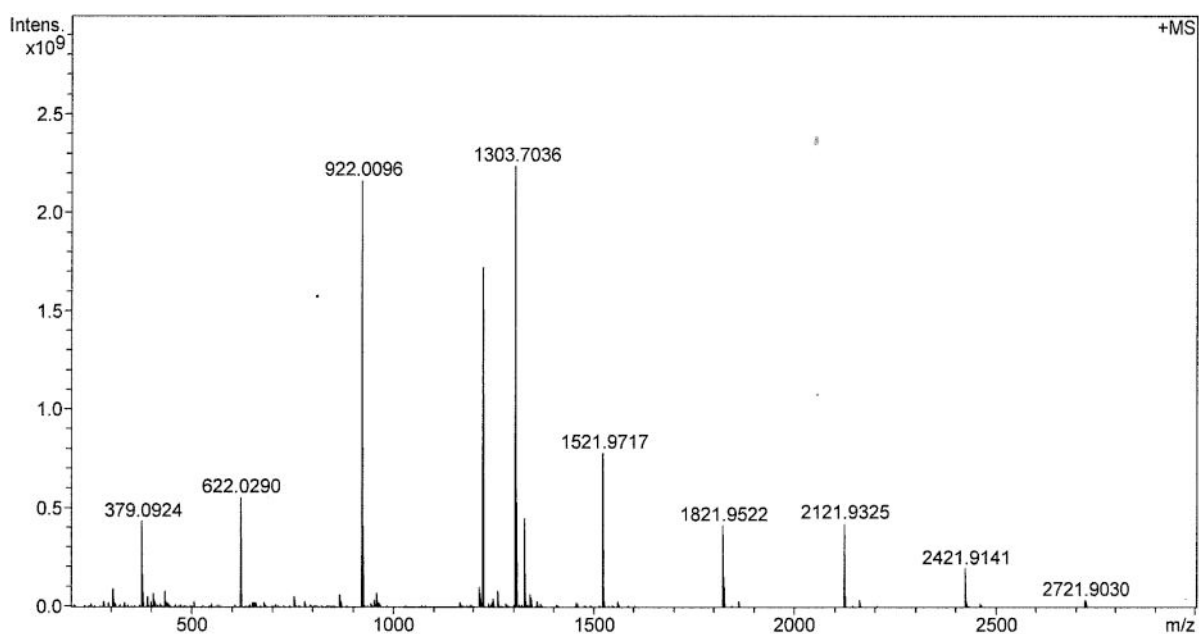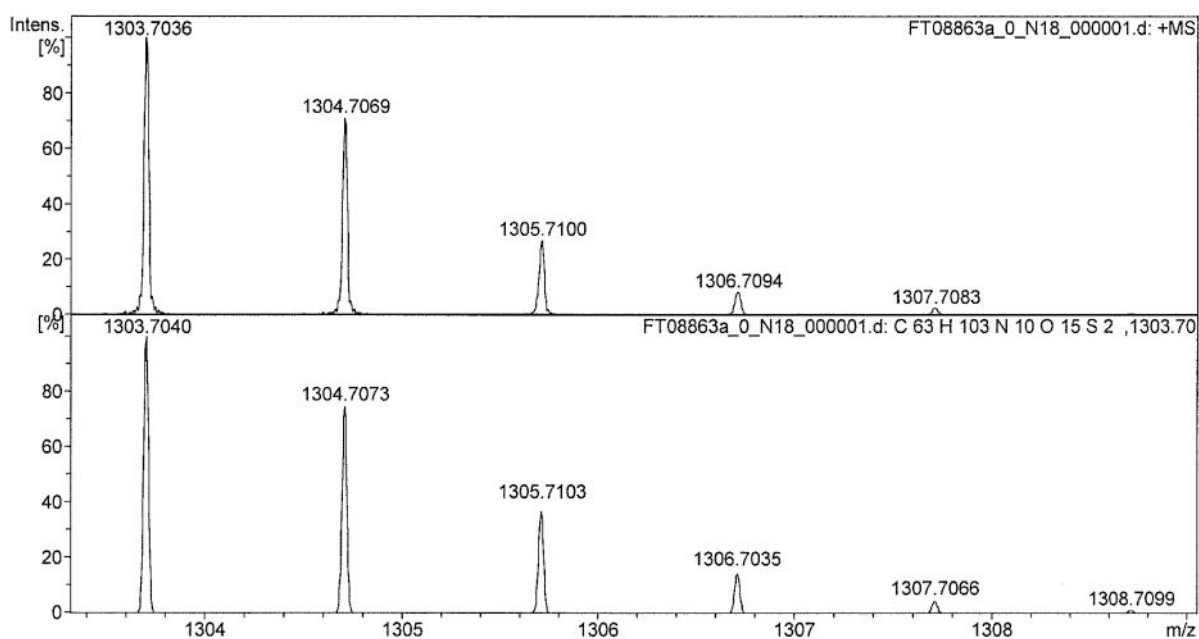

## NCL product S34

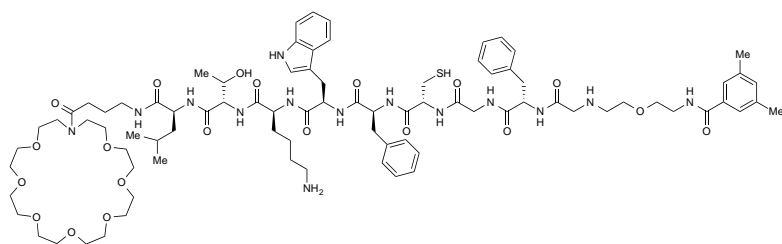

**Box 1:** Full scale spectra with internal reference peaks (ESI: Na-PFHA 408.9481, 794.9069, 1180.8657, 1566.8246, 1952.7834, 2338.7423); **Box 2:** Measured isotopic pattern of the product peak; **Box 3:** Calculated isotopic pattern of the product peak.

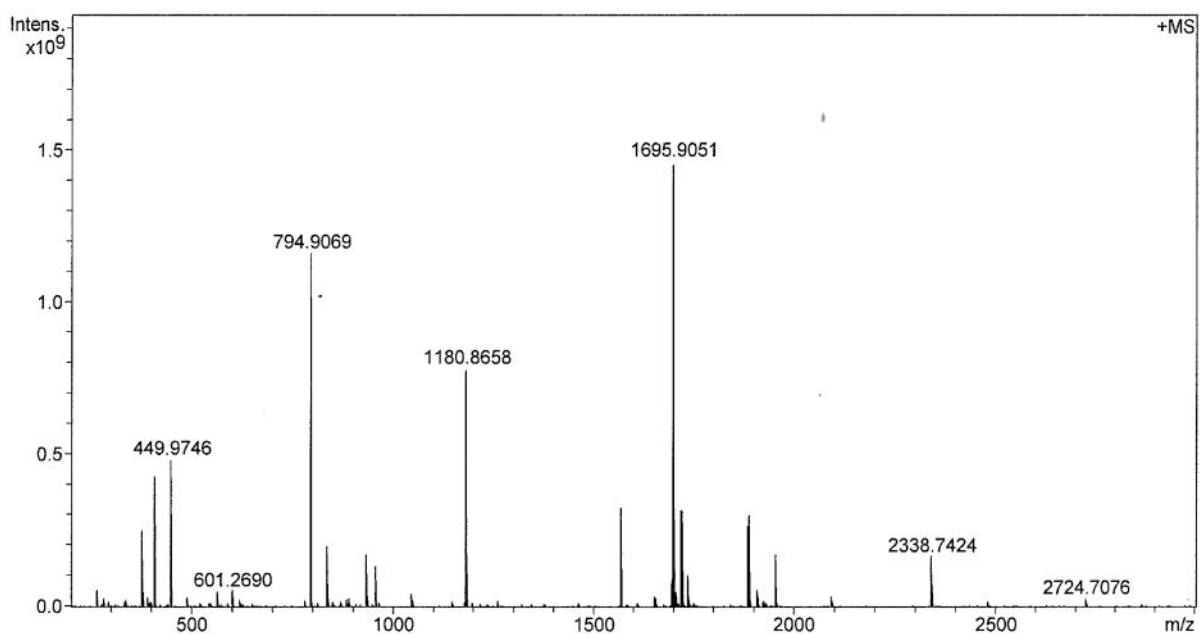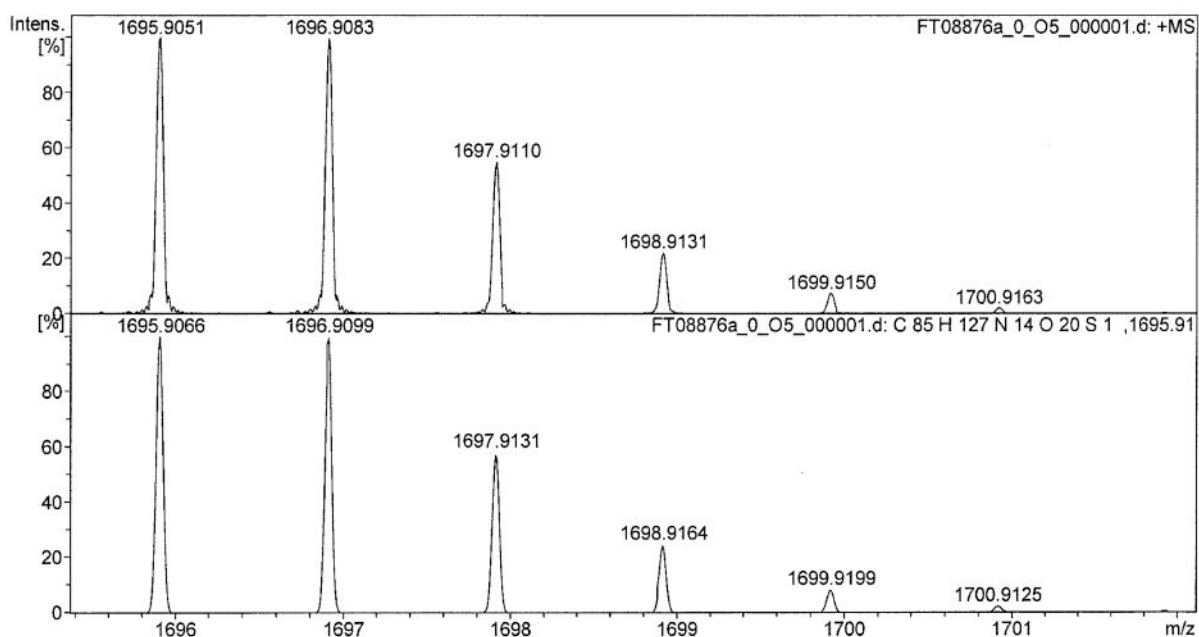

**Branched-cyclic peptide B3**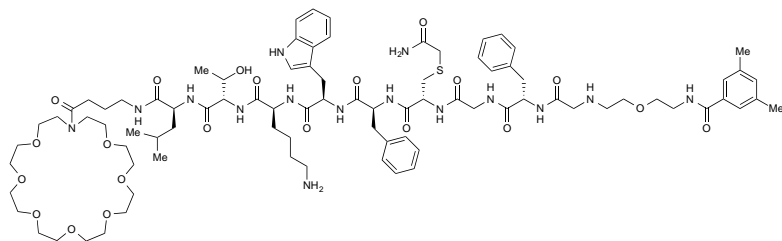

**Box 1:** Full scale spectra with internal reference peaks (ESI: Tuning Mix ES-TOF (ESI) (pos)DCTB 622.0290, 922.0098, 1221.9906, 1521.9715, 2121.9332, 2421.9140); **Box 2:** Measured isotopic pattern of the product peak; **Box 3:** Calculated isotopic pattern of the product peak.

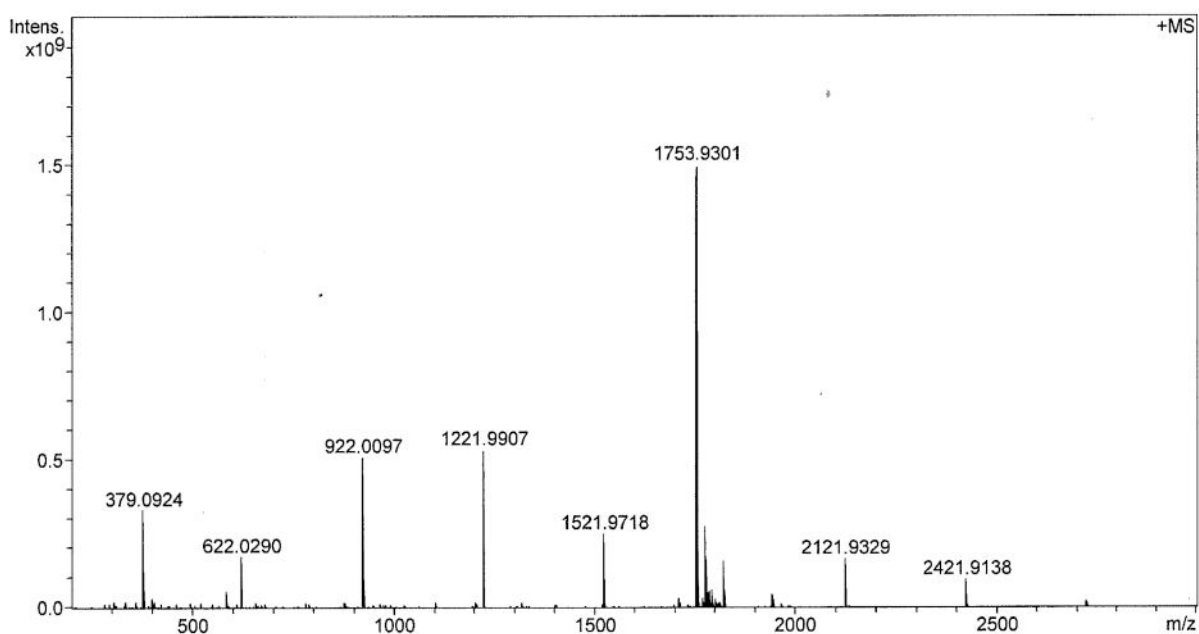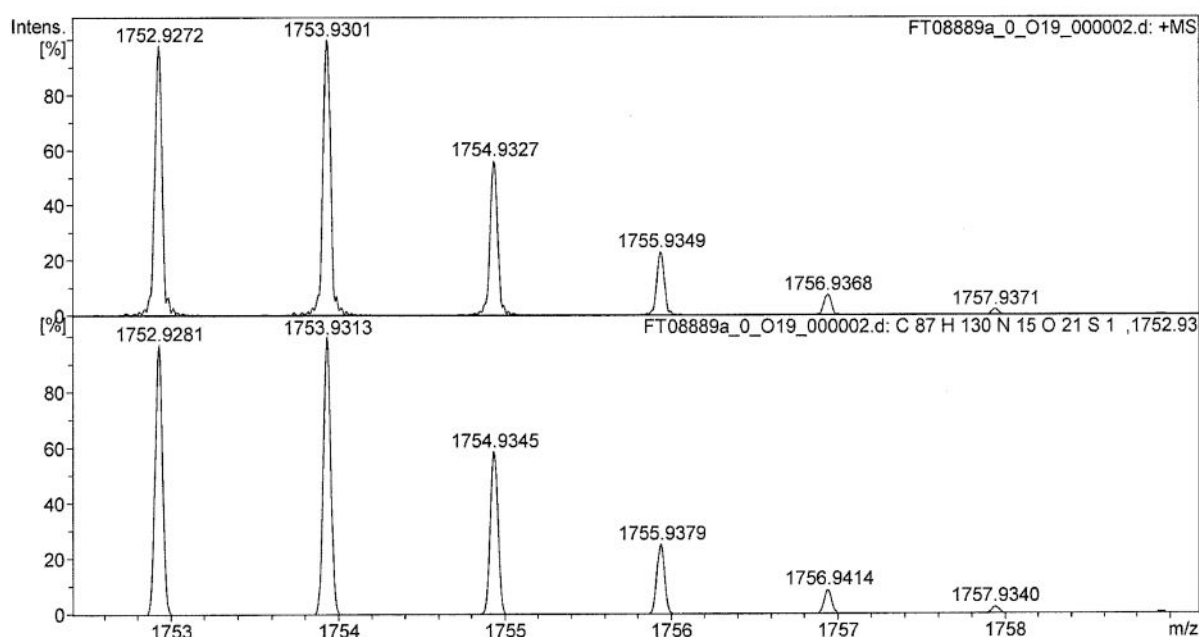

**Peptide  $\alpha$ -ketoacid Fc binder S35**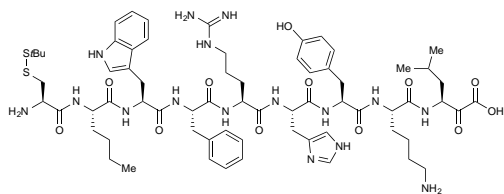

**Box 1:** Full scale spectra with internal reference peaks (ESI: Na-PFHA 408.9481, 794.9069, 1566.8246, 1952.7834, 2338.7423); **Box 2:** Measured isotopic pattern of the product peak; **Box 3:** Calculated isotopic pattern of the product peak.

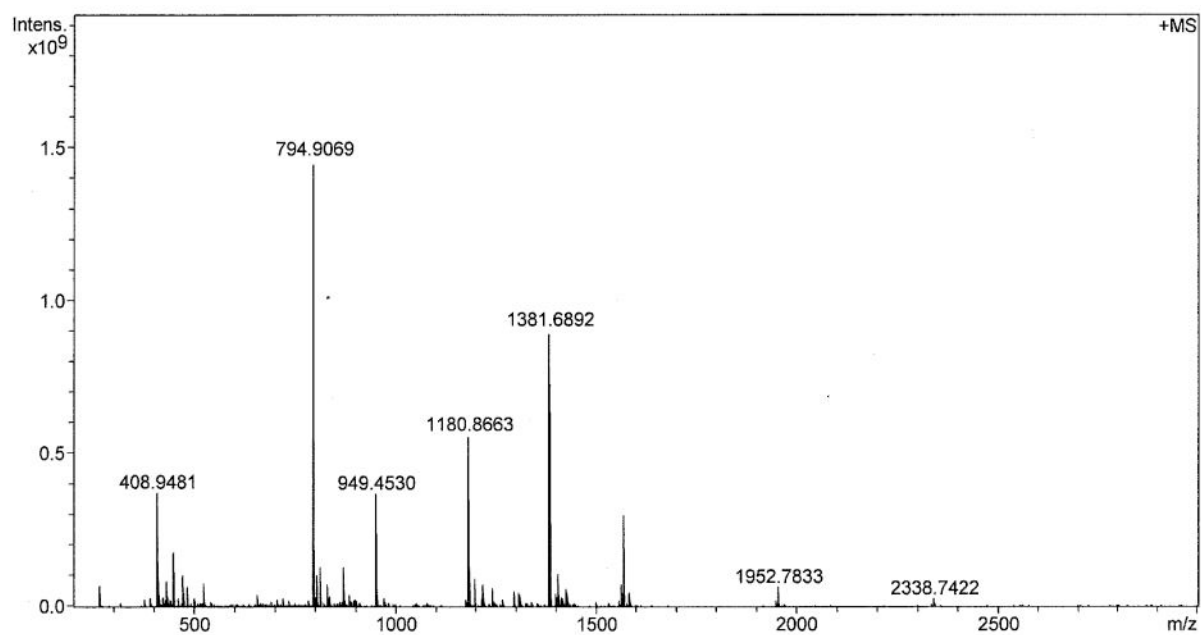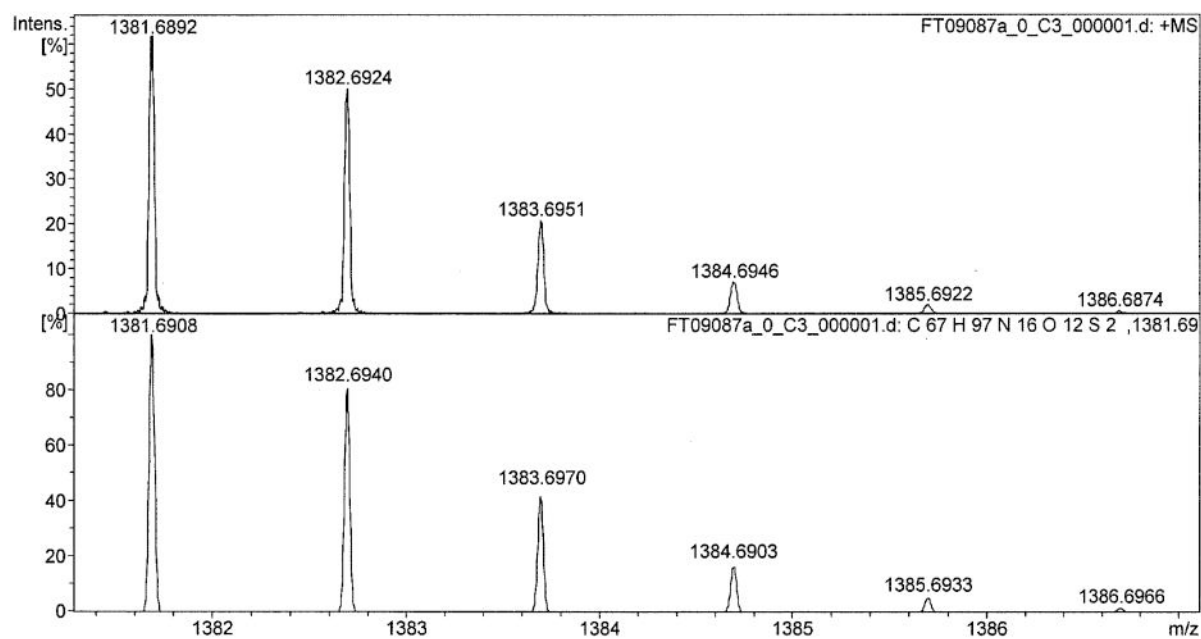



## Lasso peptide S37

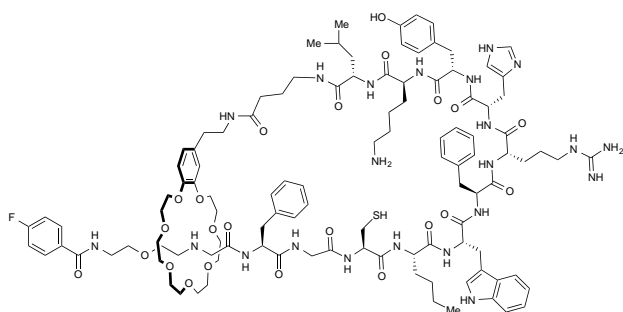

**Box 1:** Full scale spectra with internal reference peaks (ESI: Na-PFHA 1952.7834, 2724.7011, 3110.6599, 4268.5365, 4654.4953); **Box 2:** Measured isotopic pattern of the product peak; **Box 3:** Calculated isotopic pattern of the product peak.

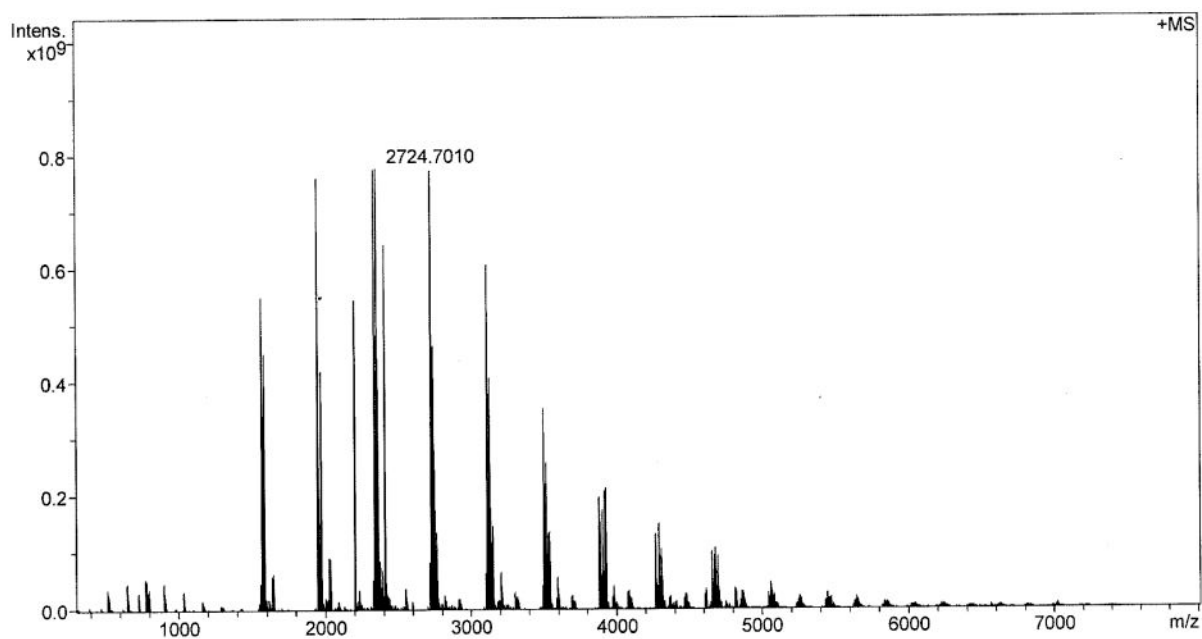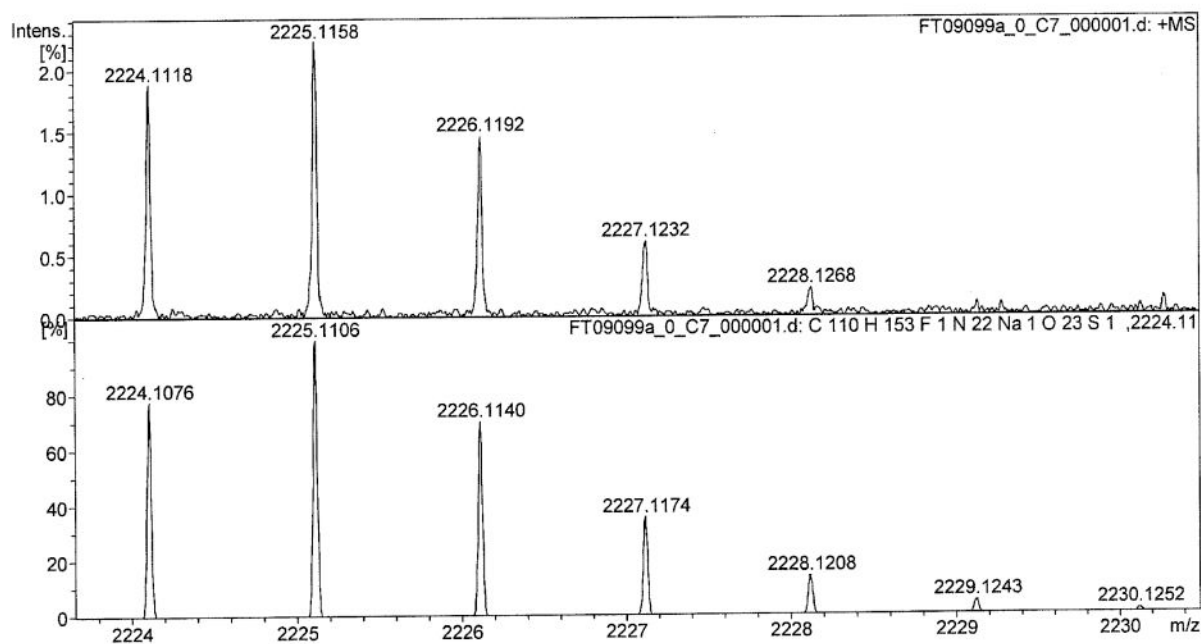

**Cys-alkylated lasso peptide 10**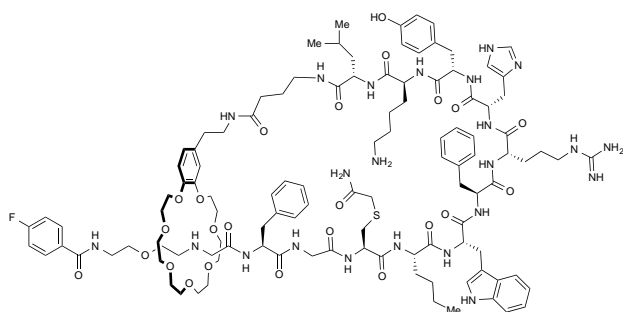

**Box 1:** Full scale spectra with internal reference peaks (ESI: Na-PFHA 1952.7834, 2724.7011, 3110.6599, 4268.5365, 5426.4130); **Box 2:** Measured isotopic pattern of the product peak; **Box 3:** Calculated isotopic pattern of the product peak.

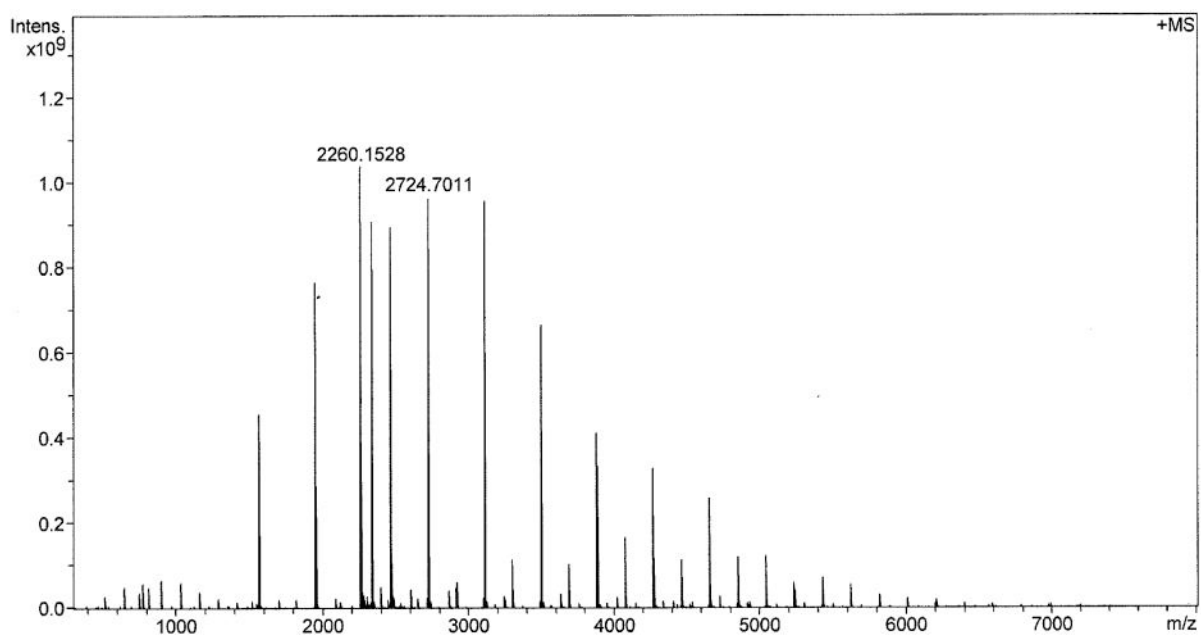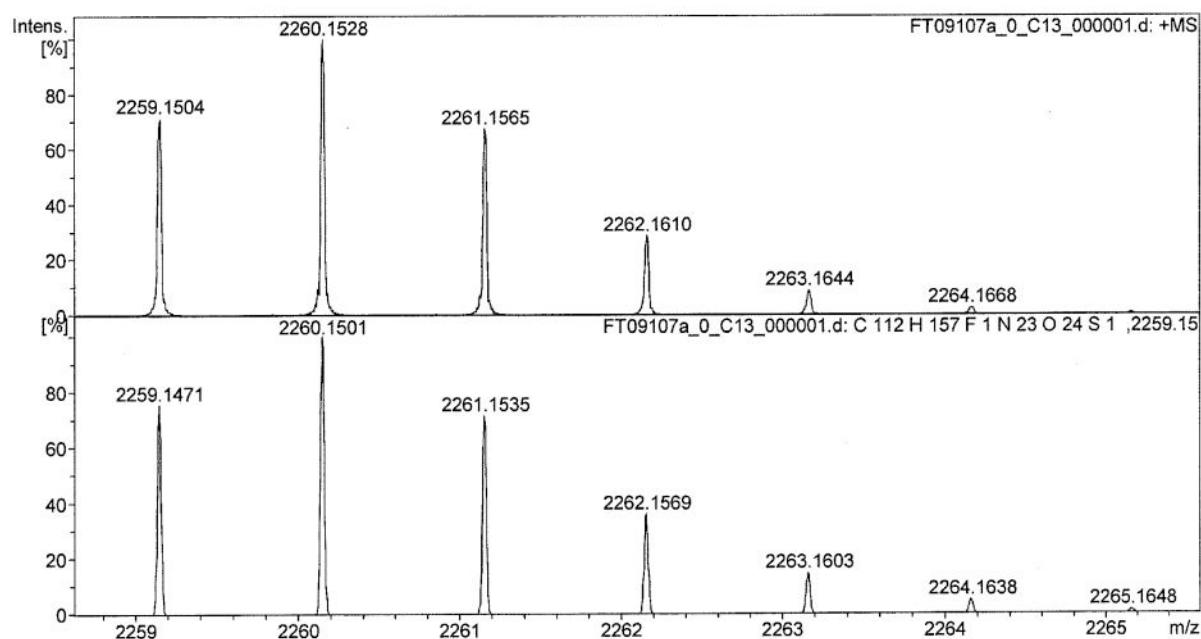

## Trypsin digestion product S38

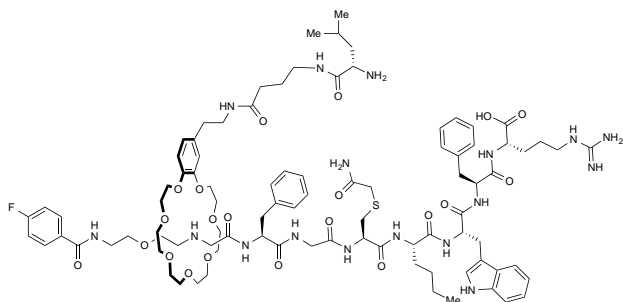

**Box 1:** Full scale spectra with internal reference peaks (ESI: Na-PFHA DCTBTmix 322.0481, 408.9481, 622.0290, 794.9069, 922.0098, 1180.8657, 1221.9906, 1521.9715, 1566.8246, 1821.9523, 1952.7834, 2338.7423); **Box 2:** Measured isotopic pattern of the product peak; **Box 3:** Calculated isotopic pattern of the product peak.

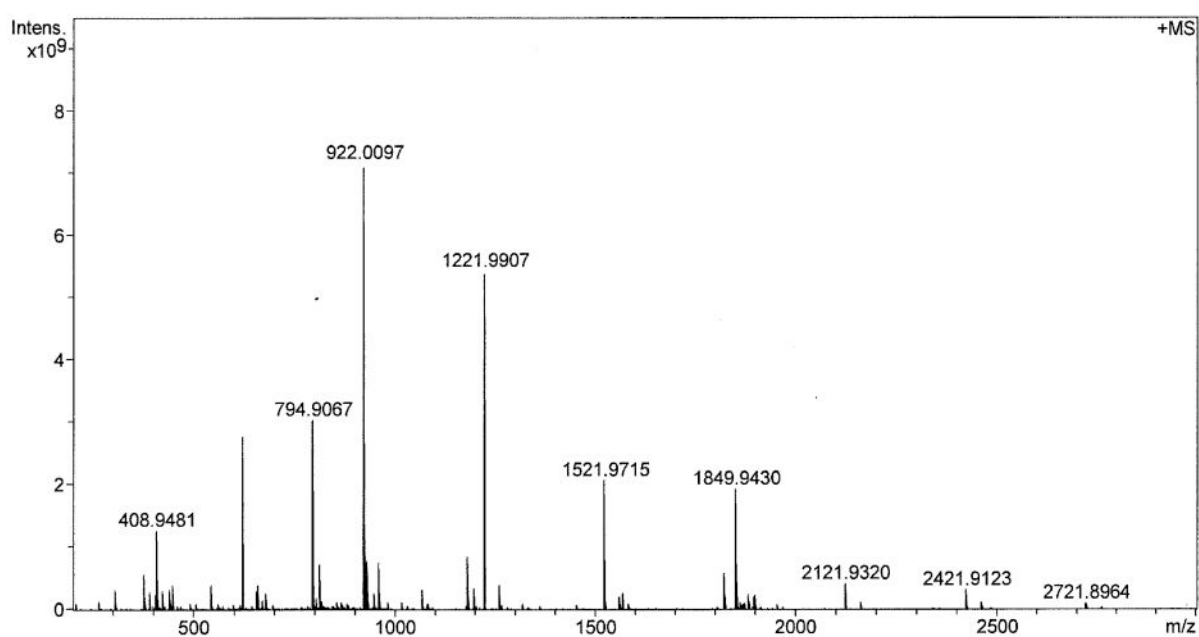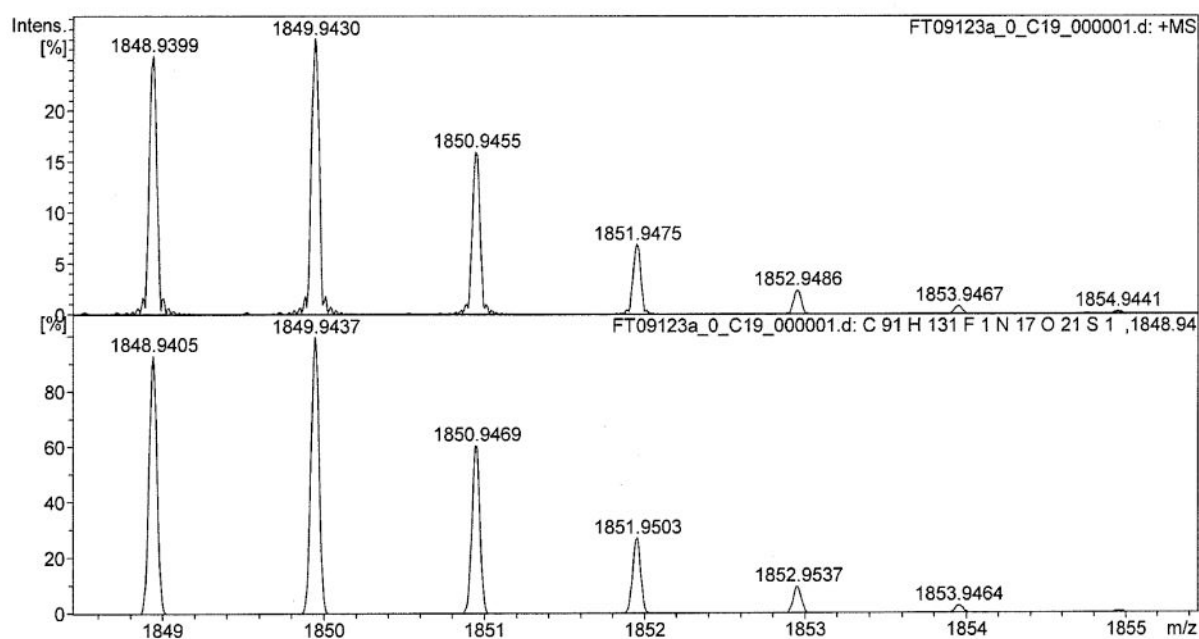



**Peptide  $\alpha$ -ketoacid lassomycin S39**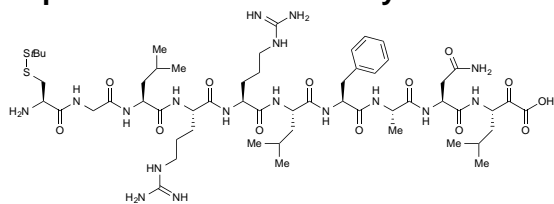

**Box 1:** Full scale spectra with internal reference peaks (ESI: Na-PFHA 408.9481, 794.9069, 1180.8657, 1566.8246, 1952.7834); **Box 2:** Measured isotopic pattern of the product peak; **Box 3:** Calculated isotopic pattern of the product peak.

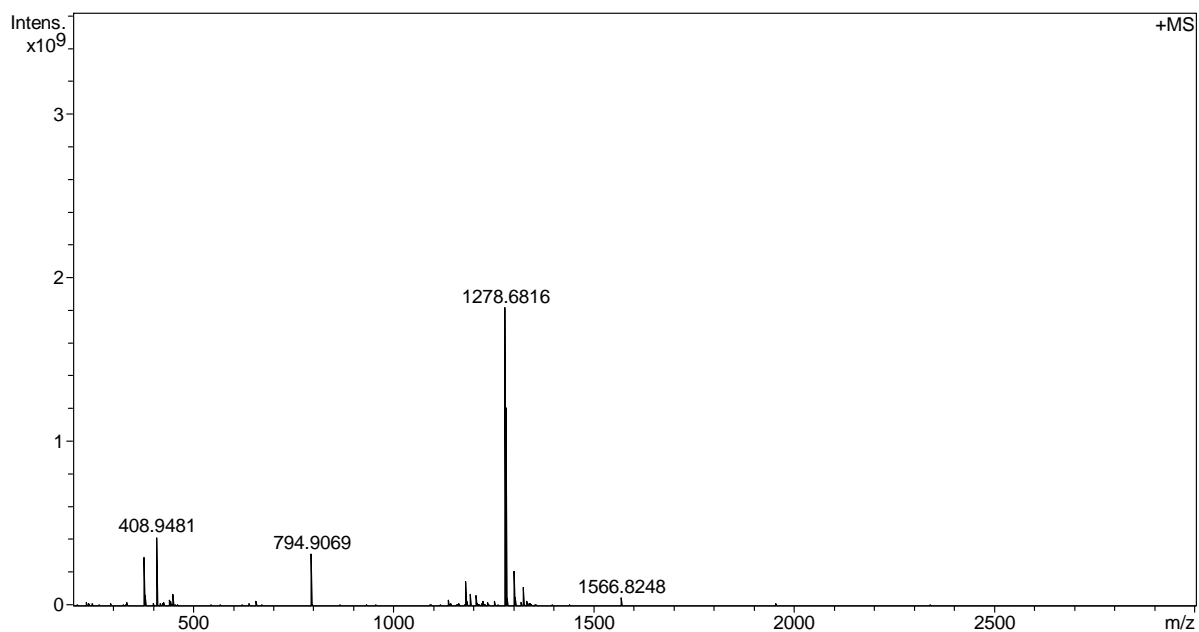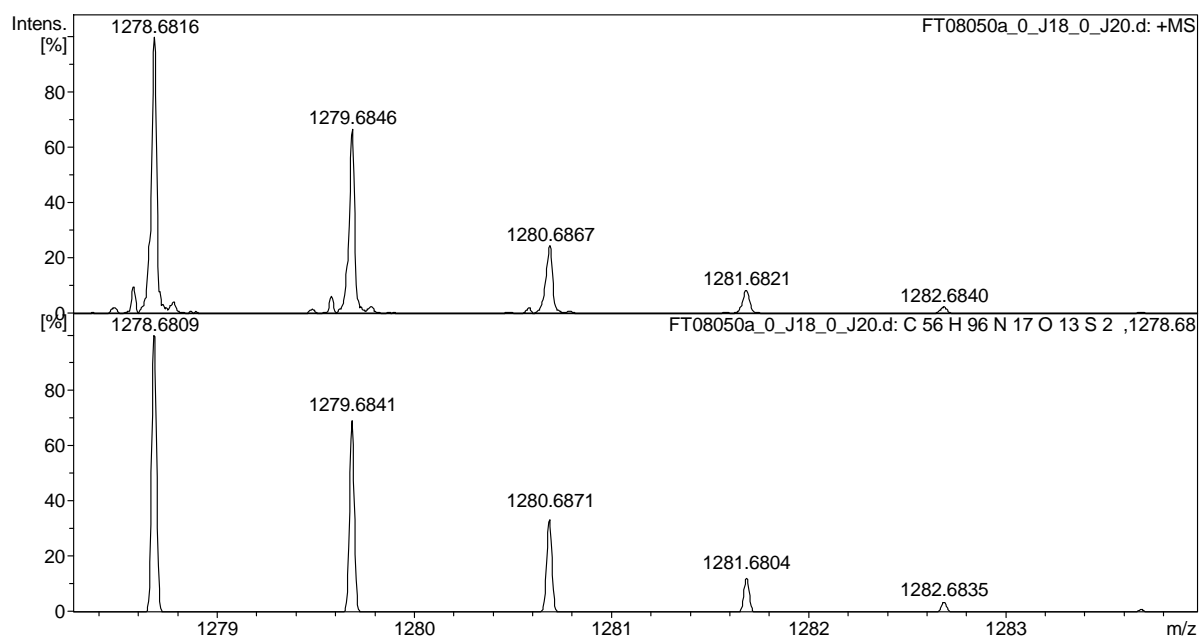



## Lasso peptide S41

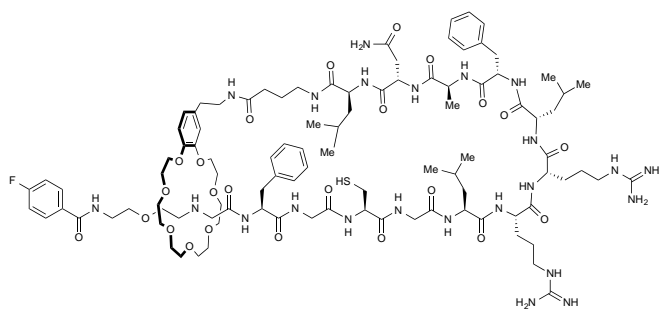

**Box 1:** Full scale spectra with internal reference peaks (ESI: Na-PFHA 1952.7834, 2338.7423, 2724.7011, 3110.6599); **Box 2:** Measured isotopic pattern of the product peak; **Box 3:** Calculated isotopic pattern of the product peak.

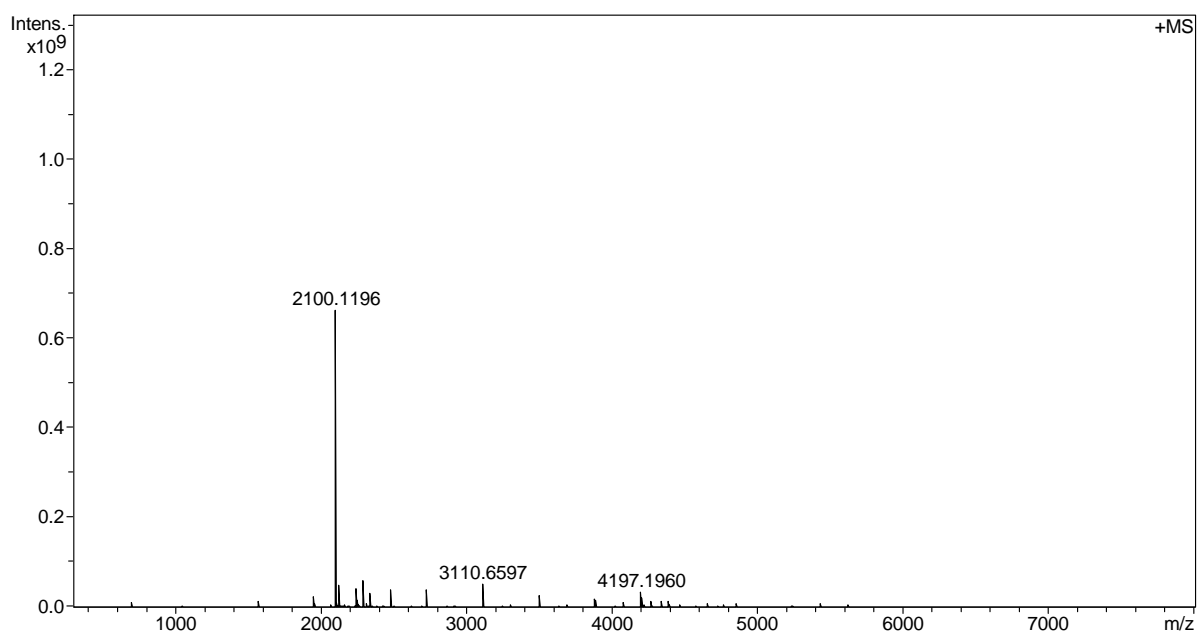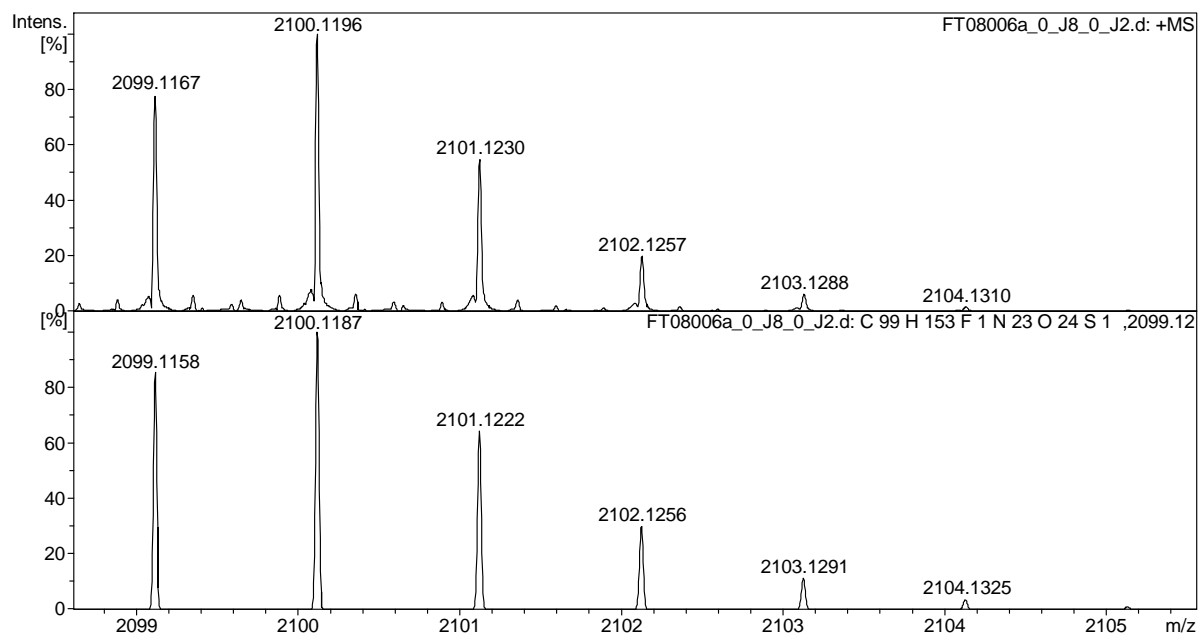

## Cys-alkylated lasso peptide 11

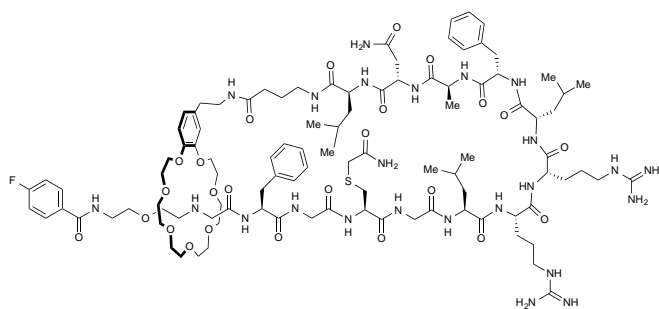

**Box 1:** Full scale spectra with internal reference peaks (ESI: Na-PFHA 1566.8246, 1952.7834, 2724.7011, 3110.6599); **Box 2:** Measured isotopic pattern of the product peak; **Box 3:** Calculated isotopic pattern of the product peak.

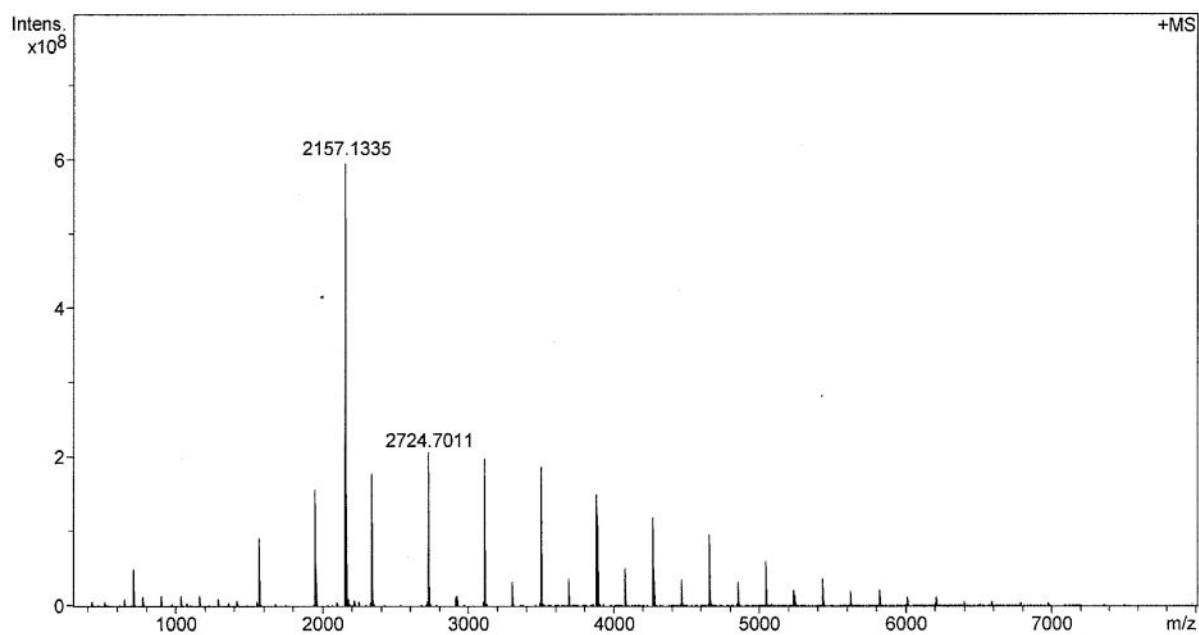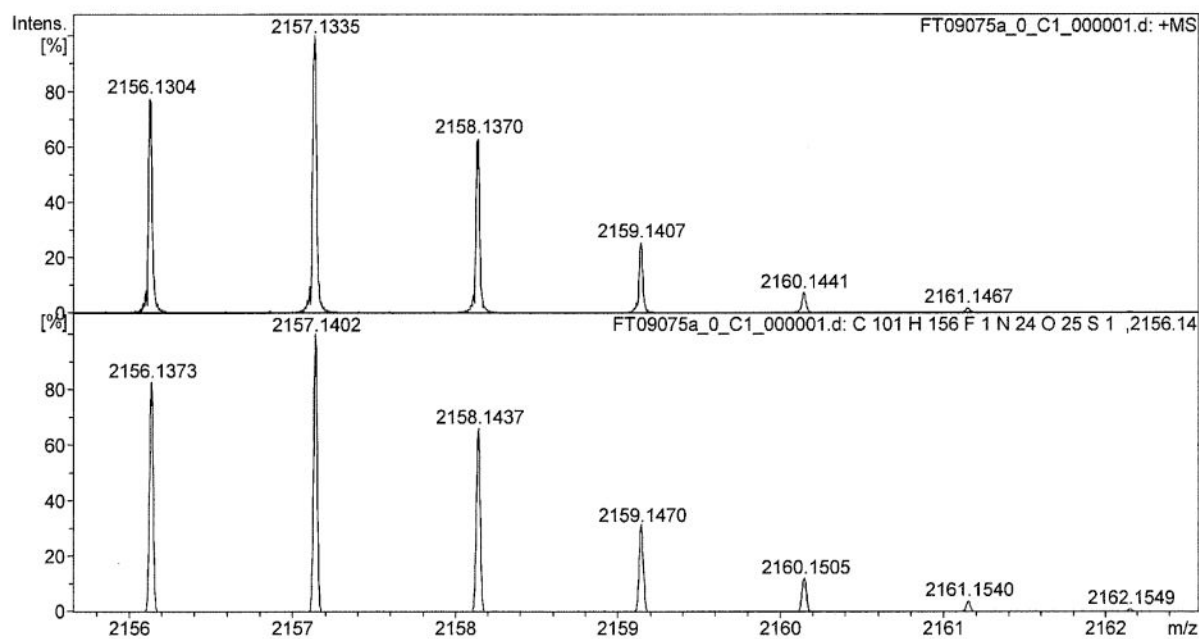

## Trypsin digestion product S42



**Box 1:** Full scale spectra with internal reference peaks (ESI: Tuning Mix ES-TOF (ESI) (pos)DCTB 1521.9715, 1821.9523, 2121.9332, 2421.9140, 2721.8948); **Box 2:** Measured isotopic pattern of the product peak; **Box 3:** Calculated isotopic pattern of the product peak.

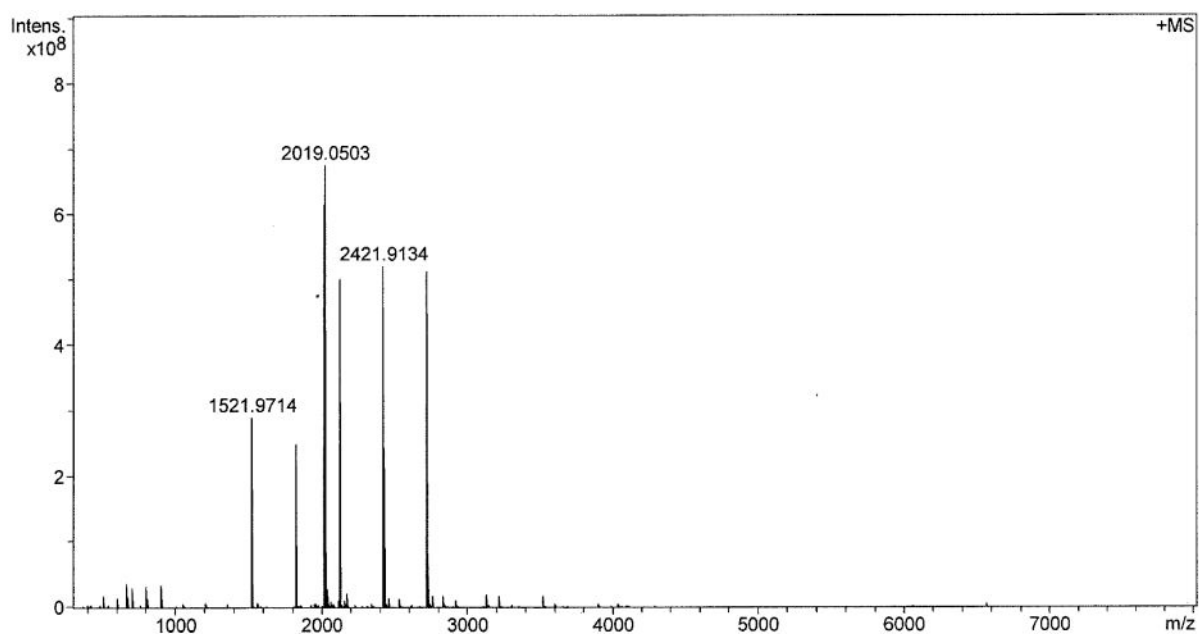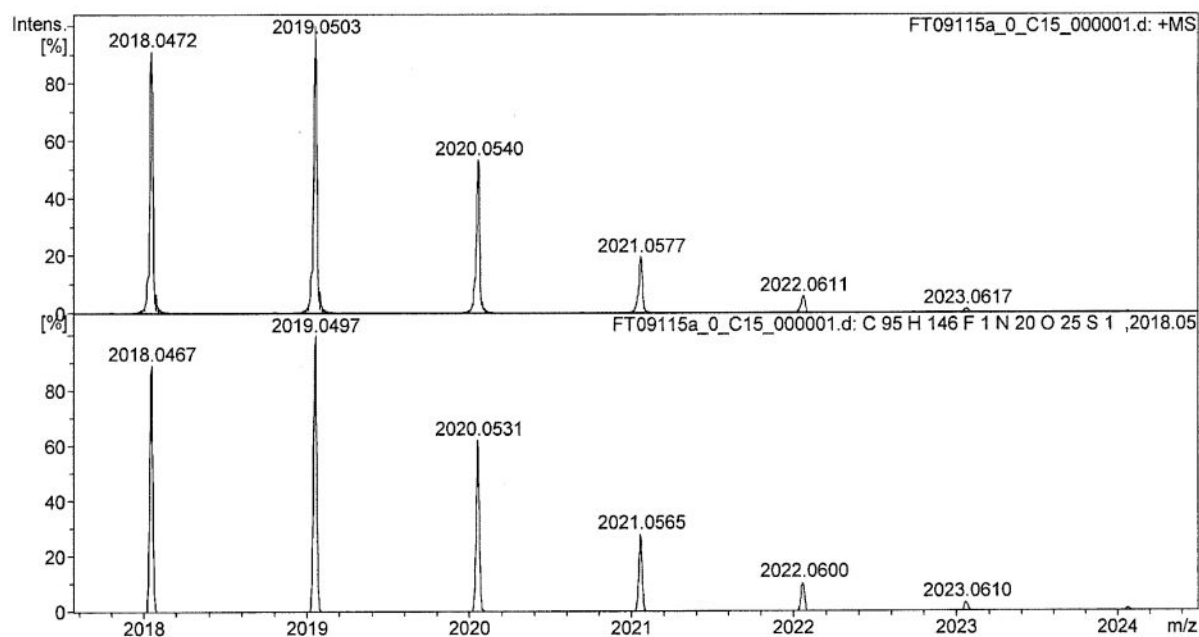

Peptide  $\alpha$ -ketoacid somatostatin S43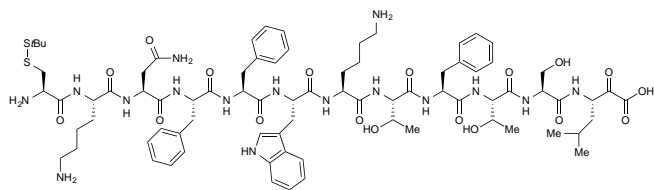

**Box 1:** Full scale spectra with internal reference peaks (ESI: Na-PFHA 408.9481, 794.9069, 1180.8657, 1566.8246, 1952.7834); **Box 2:** Measured isotopic pattern of the product peak; **Box 3:** Calculated isotopic pattern of the product peak.

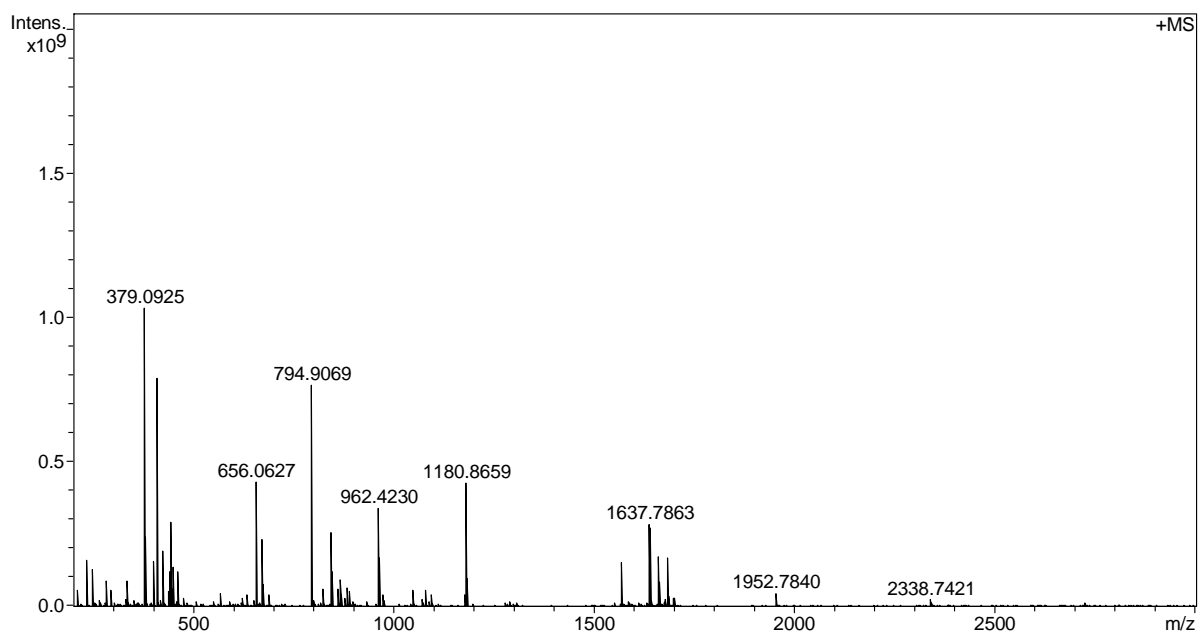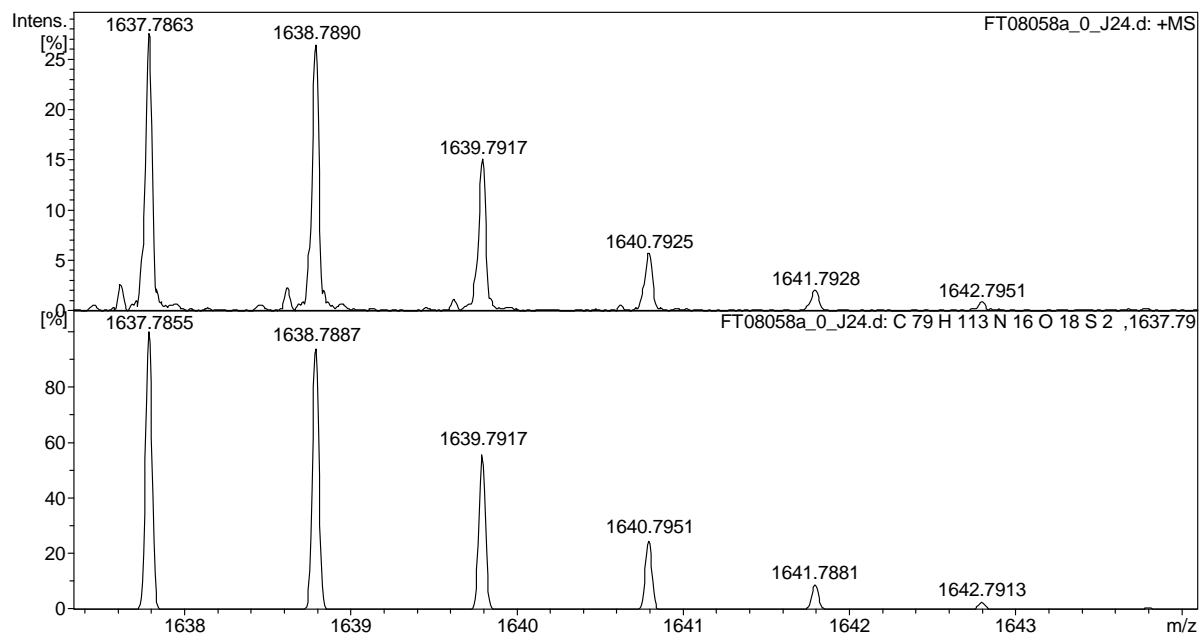

## Peptido[2]rotaxane S44

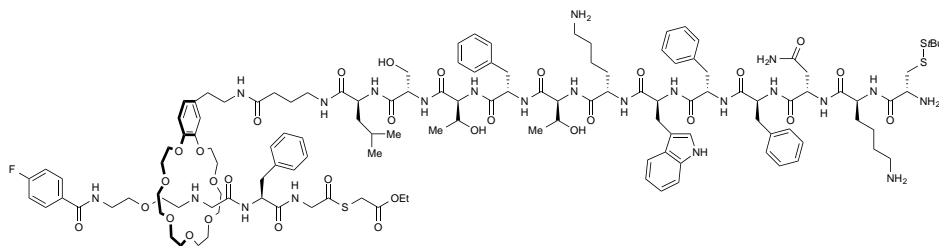

**Box 1:** Full scale spectra with internal reference peaks (ESI: Na-PFHA 2338.7423, 2724.7011, 3110.6599, 3882.5776); **Box 2:** Measured isotopic pattern of the product peak; **Box 3:** Calculated isotopic pattern of the product peak.

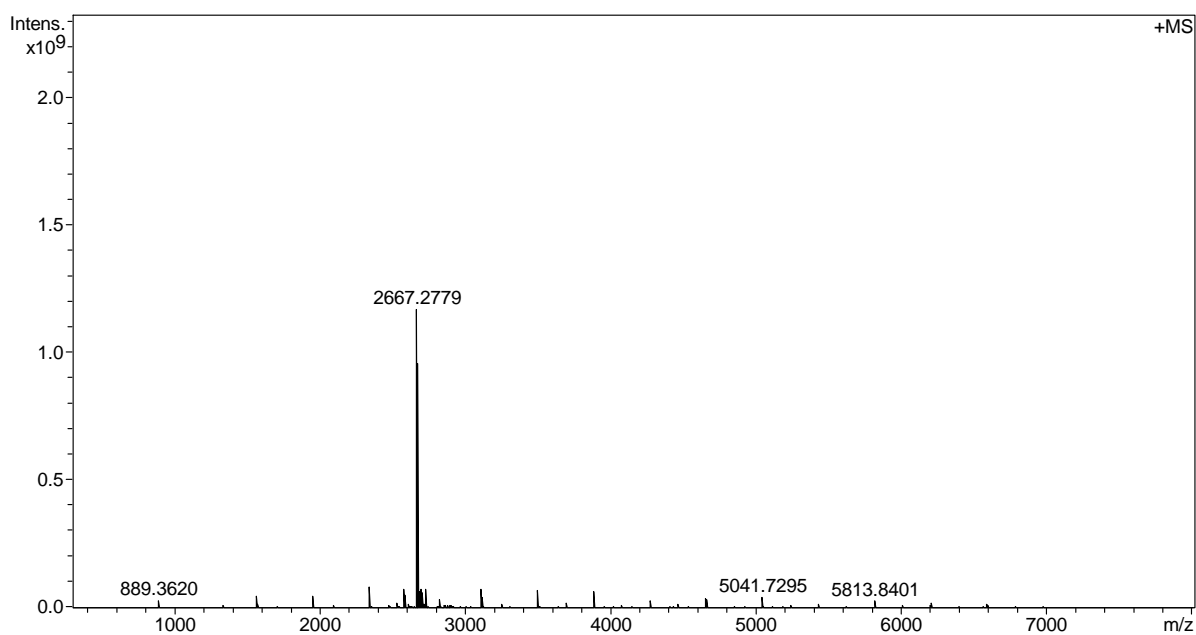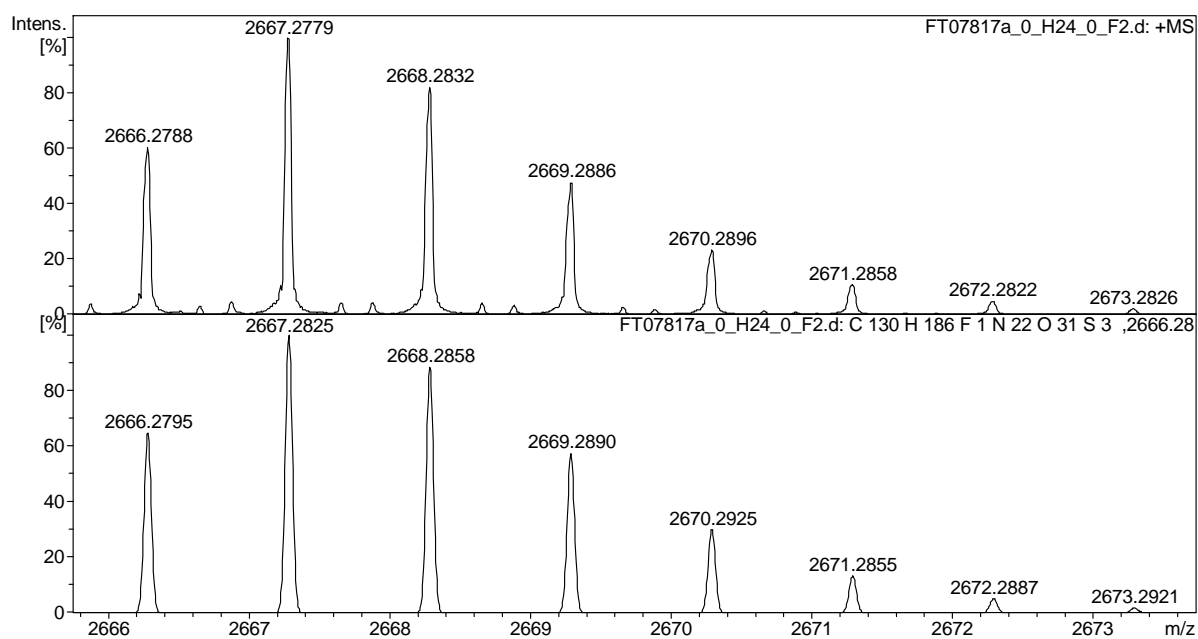

## Lasso peptide S45

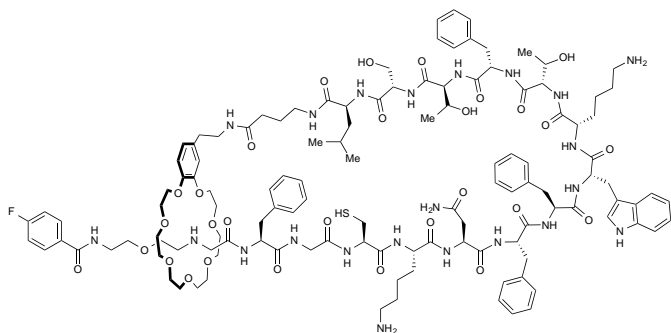

**Box 1:** Full scale spectra with internal reference peaks (ESI: Na-PFHA 2338.7423, 2724.7011, 3496.6188, 3882.5776); **Box 2:** Measured isotopic pattern of the product peak; **Box 3:** Calculated isotopic pattern of the product peak.

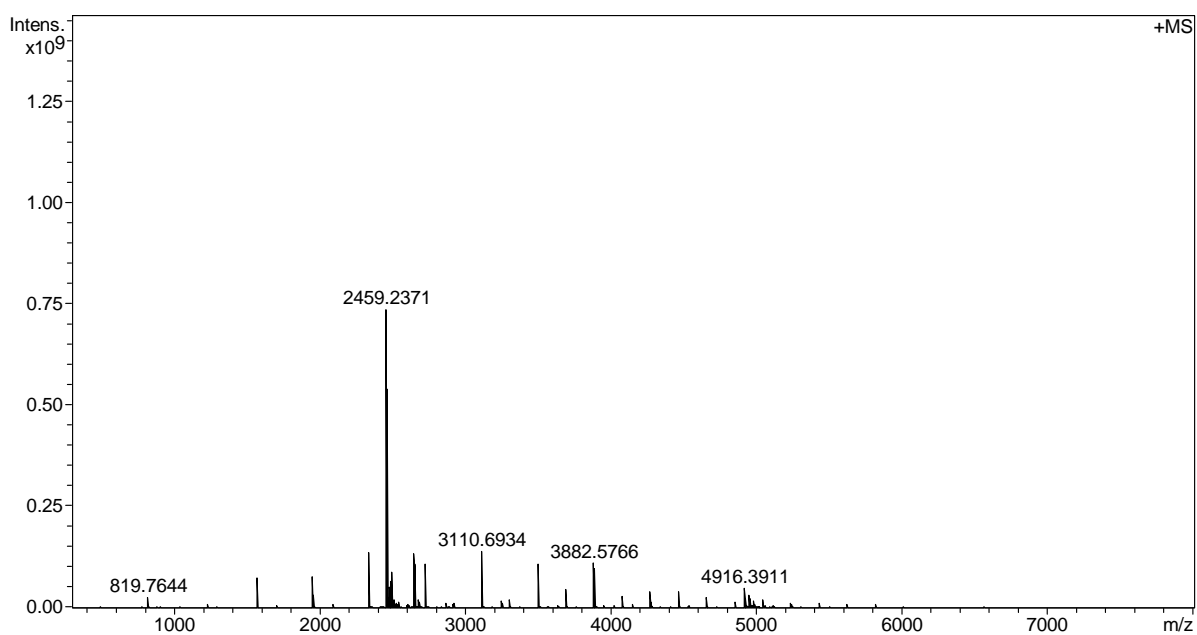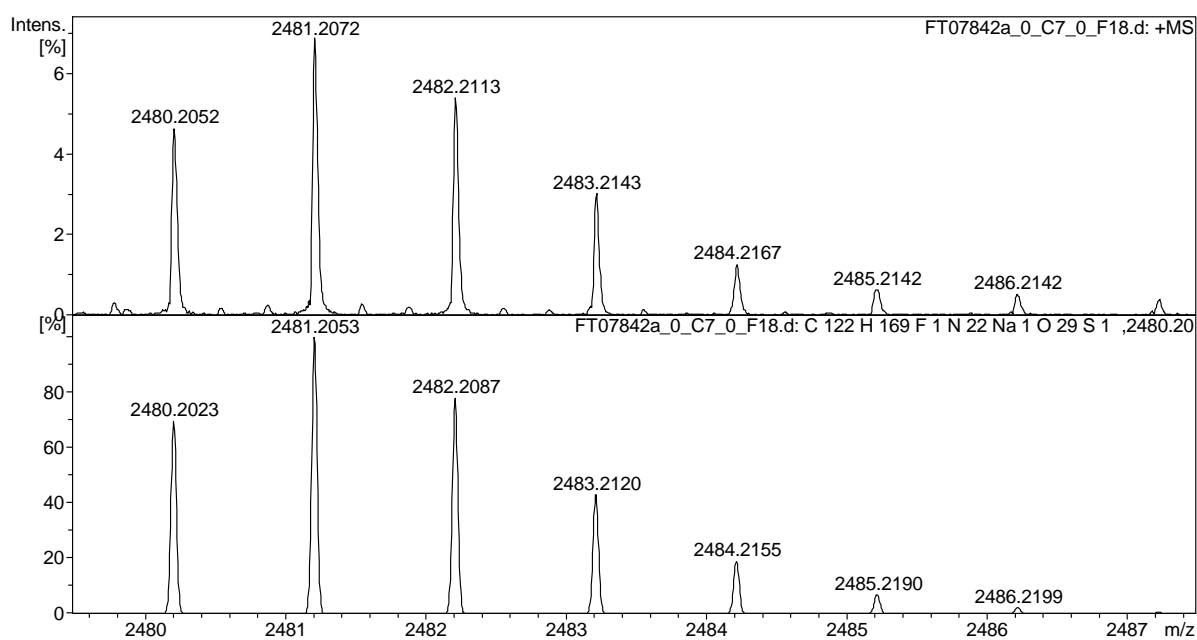



## Cys-alkylated lasso peptide 12

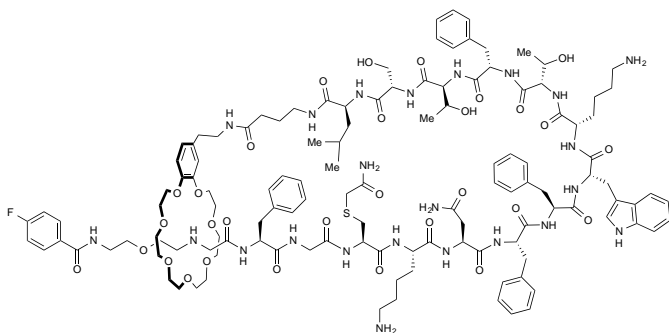

**Box 1:** Full scale spectra with internal reference peaks (ESI: Na-PFHA 2338.7423, 2724.7011, 3110.6599, 3496.6188); **Box 2:** Measured isotopic pattern of the product peak; **Box 3:** Calculated isotopic pattern of the product peak.

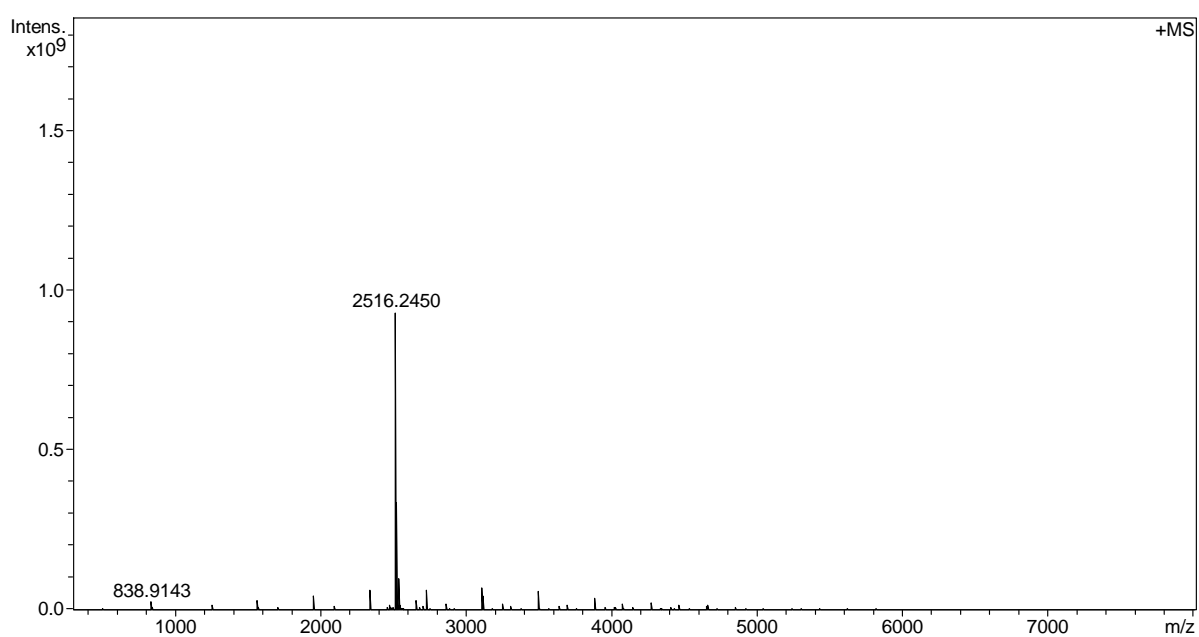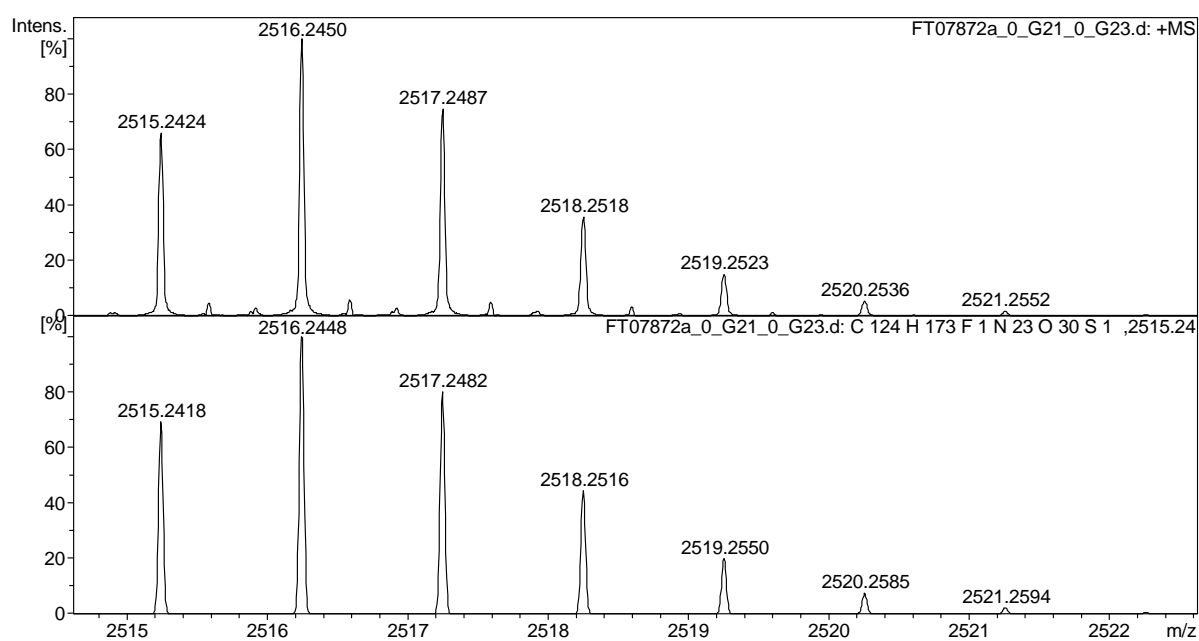

## Degradation product S46

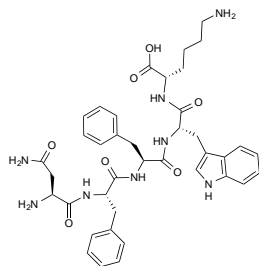

**Box 1:** Full scale spectra with internal reference peaks (ESI: Na-PFHA 408.9481, 794.9069, 1180.8657, 1566.8246); **Box 2:** Measured isotopic pattern of the product peak; **Box 3:** Calculated isotopic pattern of the product peak.

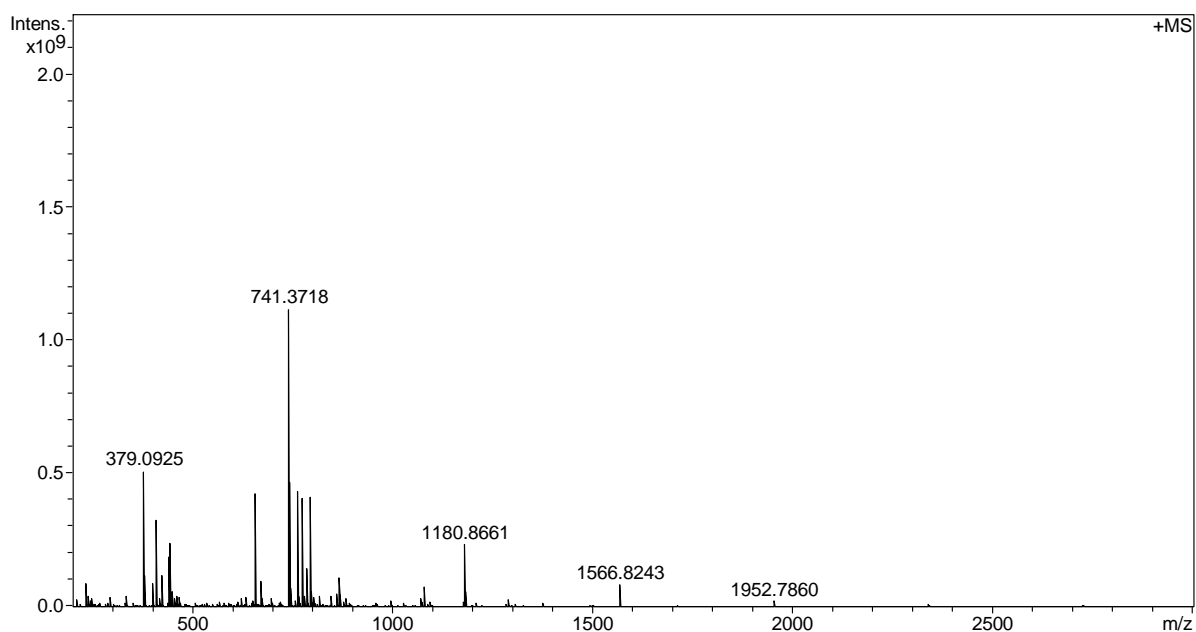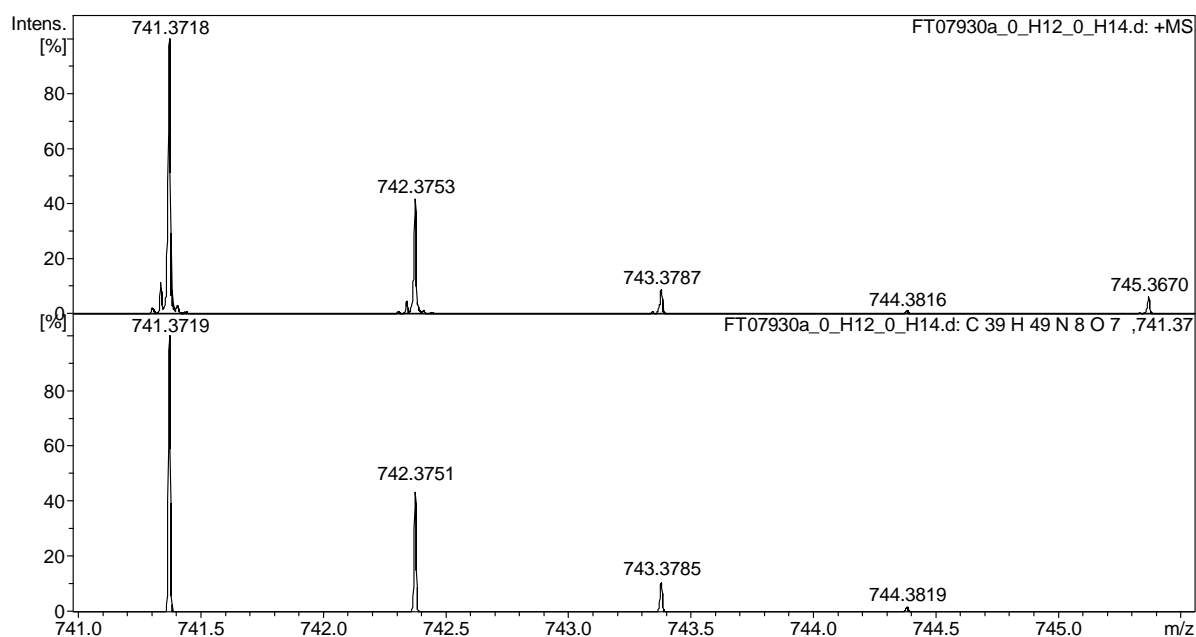



**Bifunctional linear peptide S48**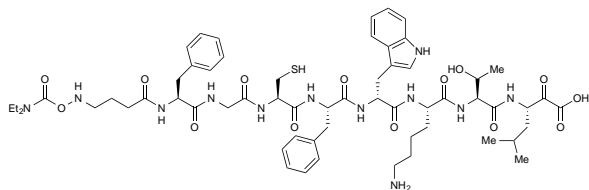

**Box 1:** Full scale spectra with internal reference peaks (ESI: Na-PFHA 408.9481, 794.9069, 1180.8657, 1566.8246); **Box 2:** Measured isotopic pattern of the product peak; **Box 3:** Calculated isotopic pattern of the product peak.

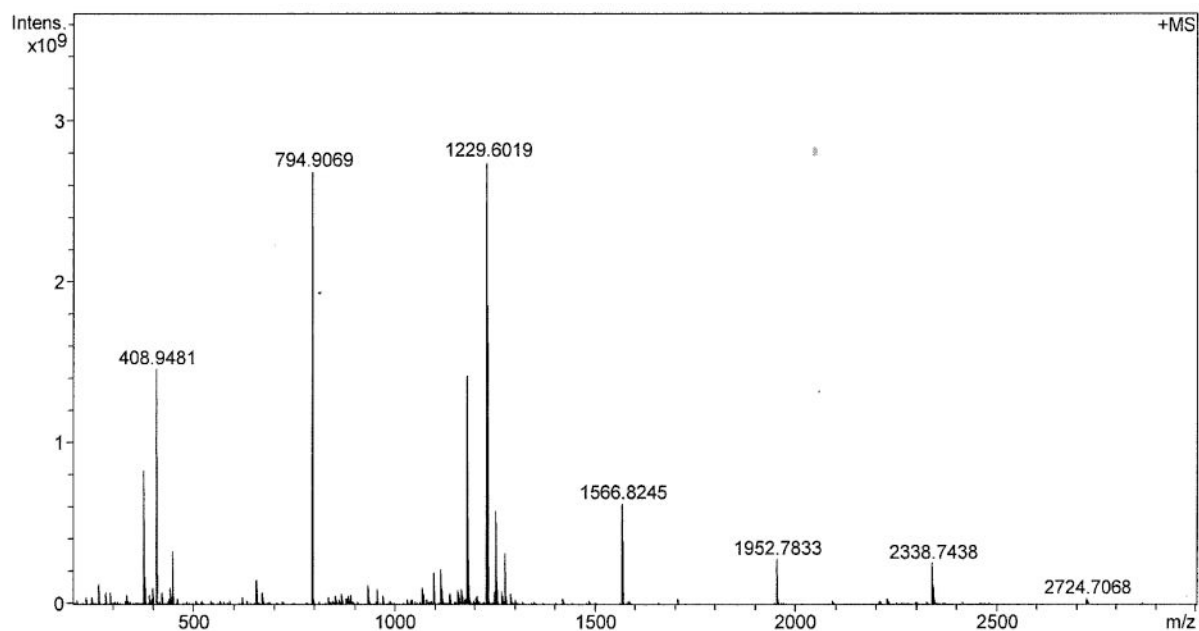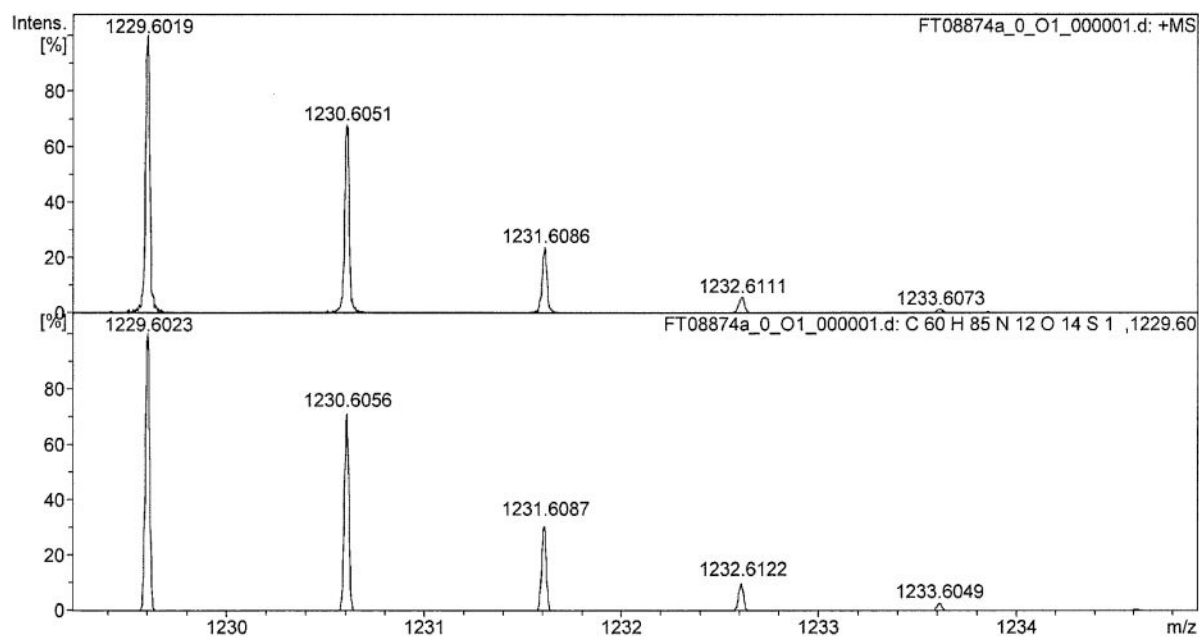

## Cyclic peptide S49

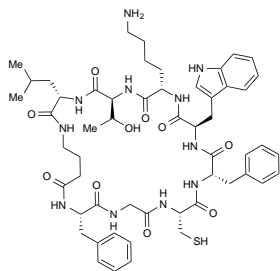

**Box 1:** Full scale spectra with internal reference peaks (ESI: Na-PFHA 408.9481, 794.9069, 1180.8657, 1566.8246); **Box 2:** Measured isotopic pattern of the product peak; **Box 3:** Calculated isotopic pattern of the product peak.

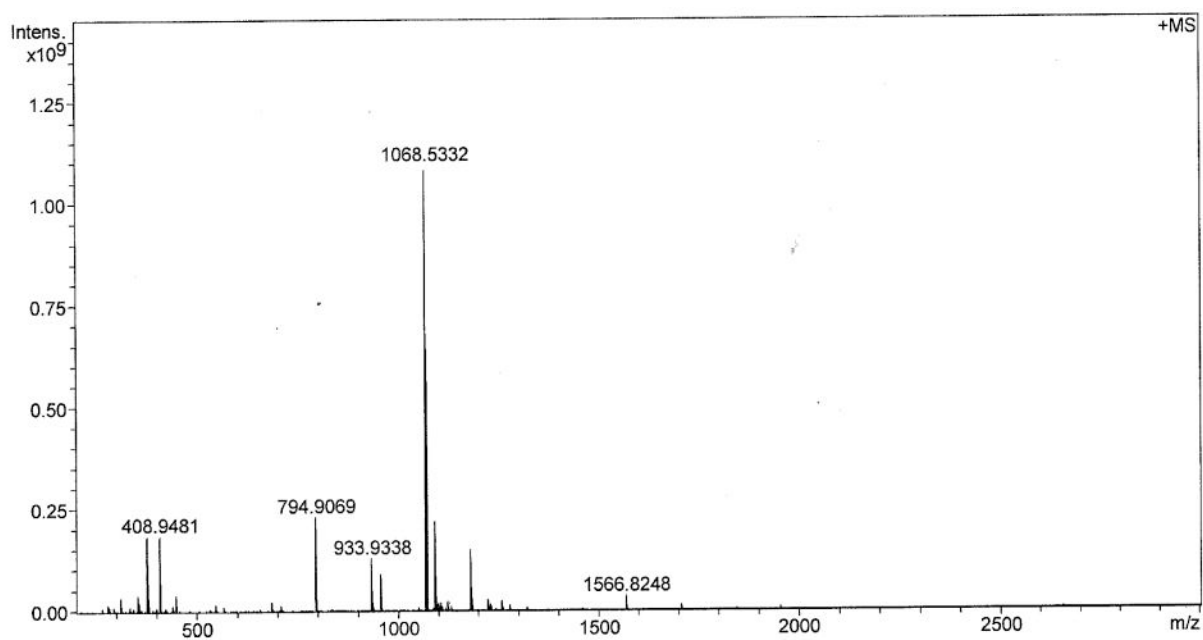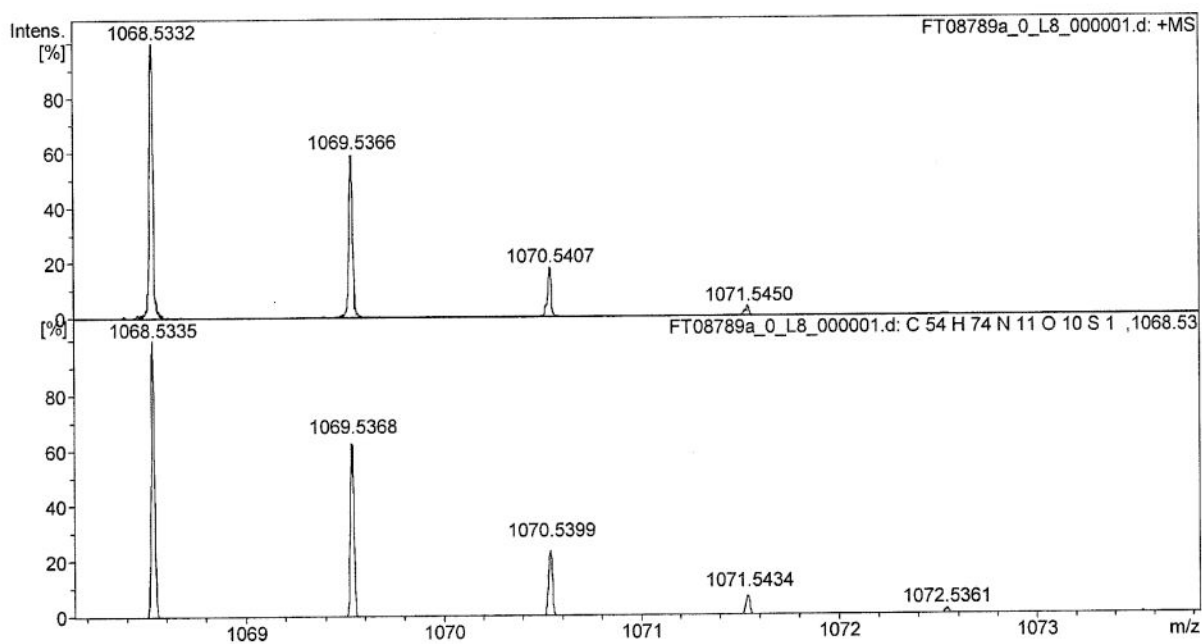

**Cyclic peptide C1**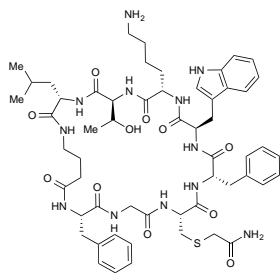

**Box 1:** Full scale spectra with internal reference peaks (ESI: Na-PFHA 408.9481, 794.9069, 1180.8657, 1566.8246); **Box 2:** Measured isotopic pattern of the product peak; **Box 3:** Calculated isotopic pattern of the product peak.

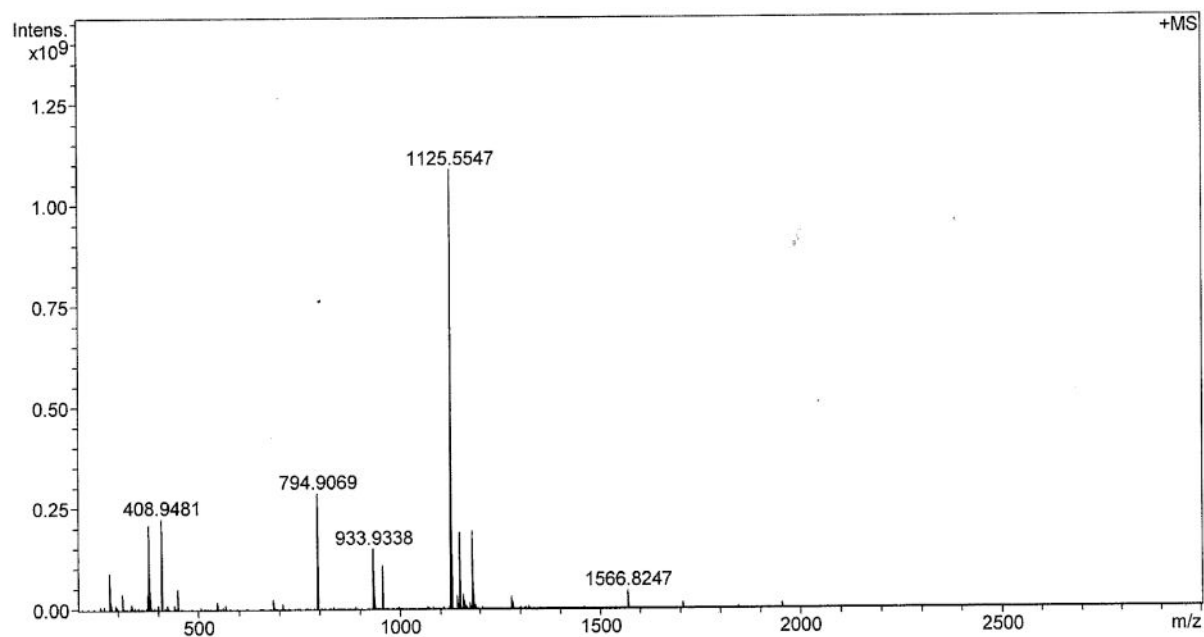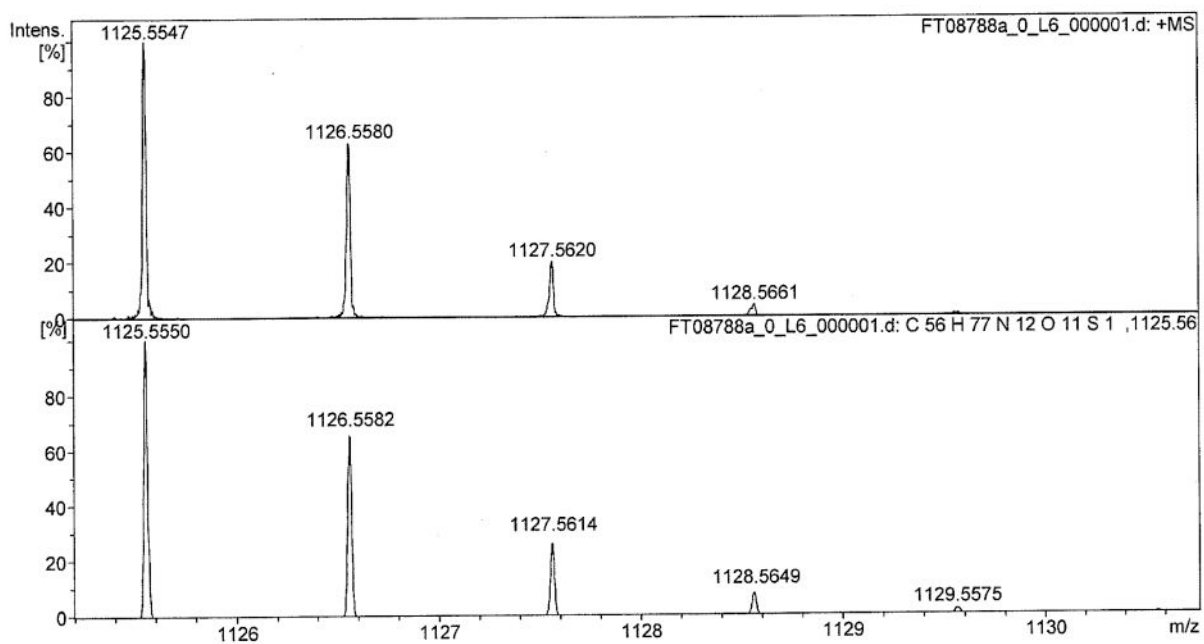

## Degradation product S50

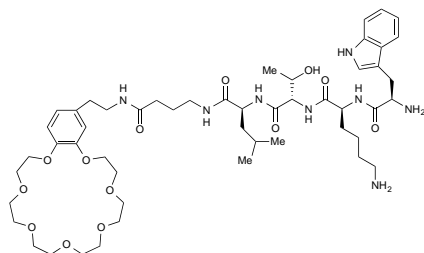

**Box 1:** Full scale spectra with internal reference peaks (ESI: Na-PFHA 408.9481, 794.9069, 1180.8657, 1566.8246); **Box 2:** Measured isotopic pattern of the product peak; **Box 3:** Calculated isotopic pattern of the product peak.

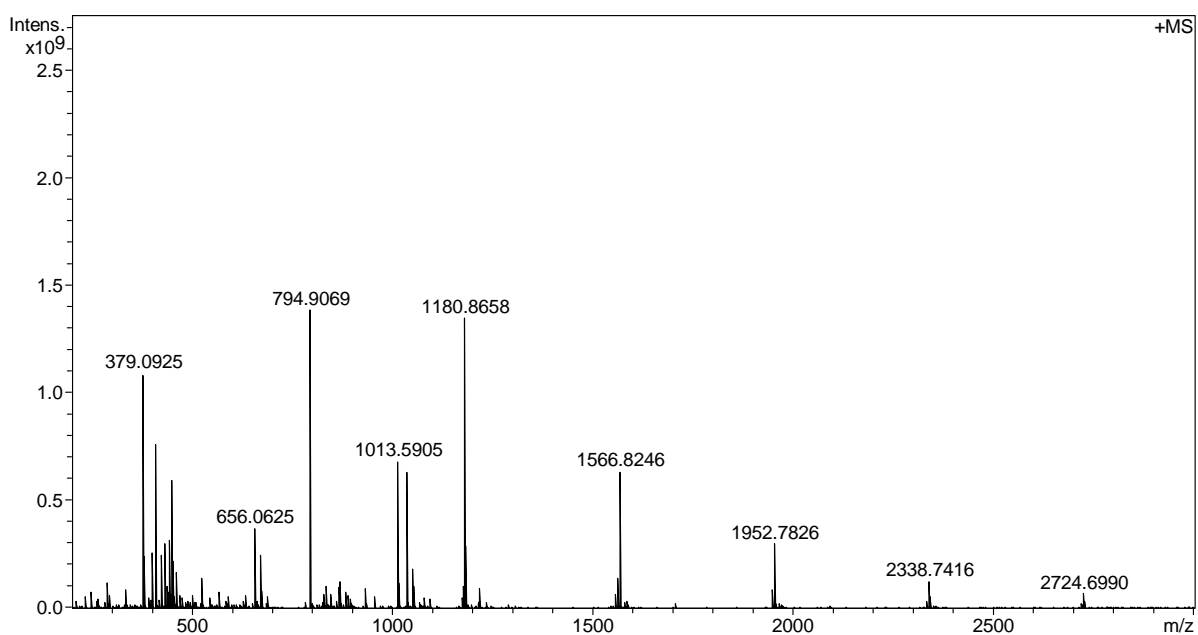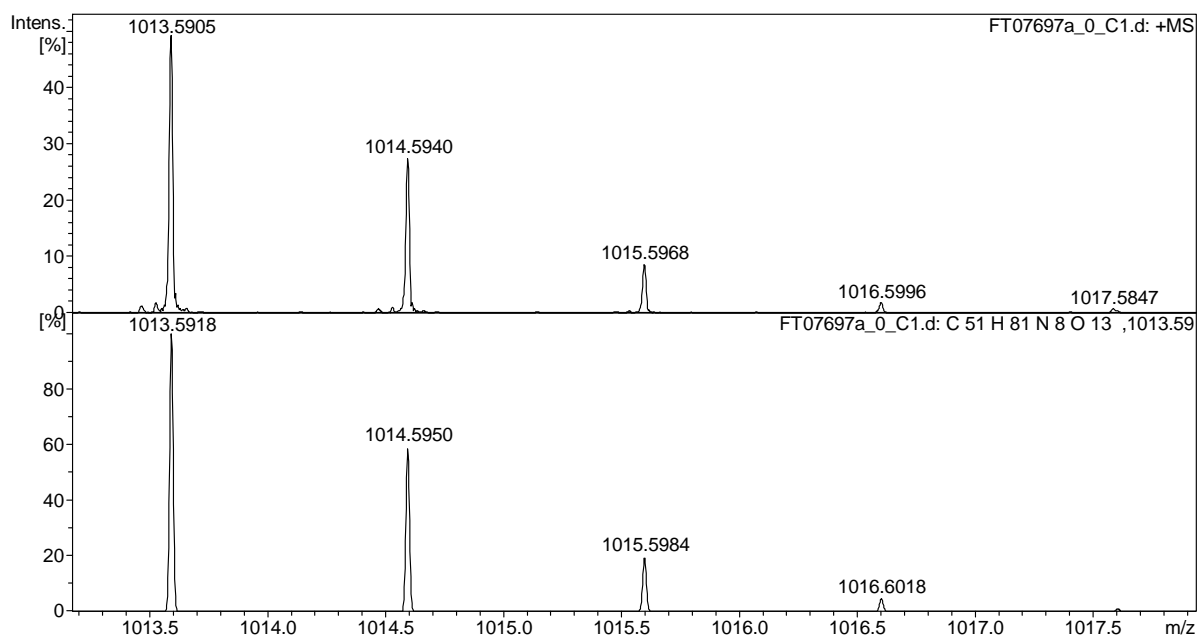







## Degradation product S53

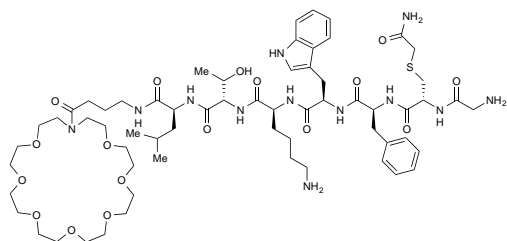

**Box 1:** Full scale spectra with internal reference peaks (ESI: Na-PFHA 408.9481, 794.9069, 1180.8657, 1952.7834, 2338.7423); **Box 2:** Measured isotopic pattern of the product peak; **Box 3:** Calculated isotopic pattern of the product peak.

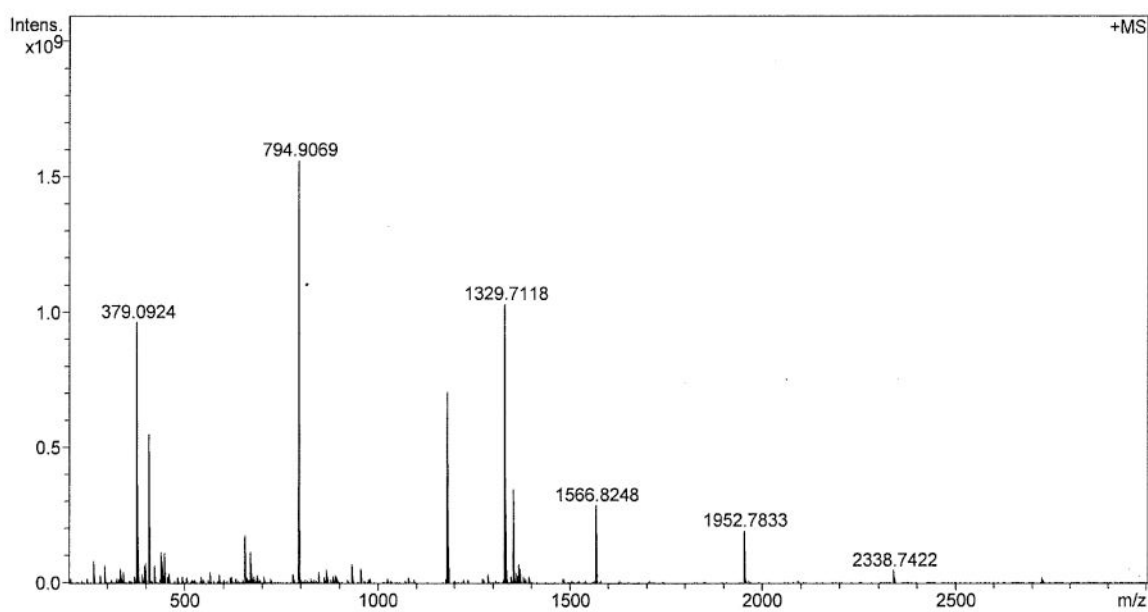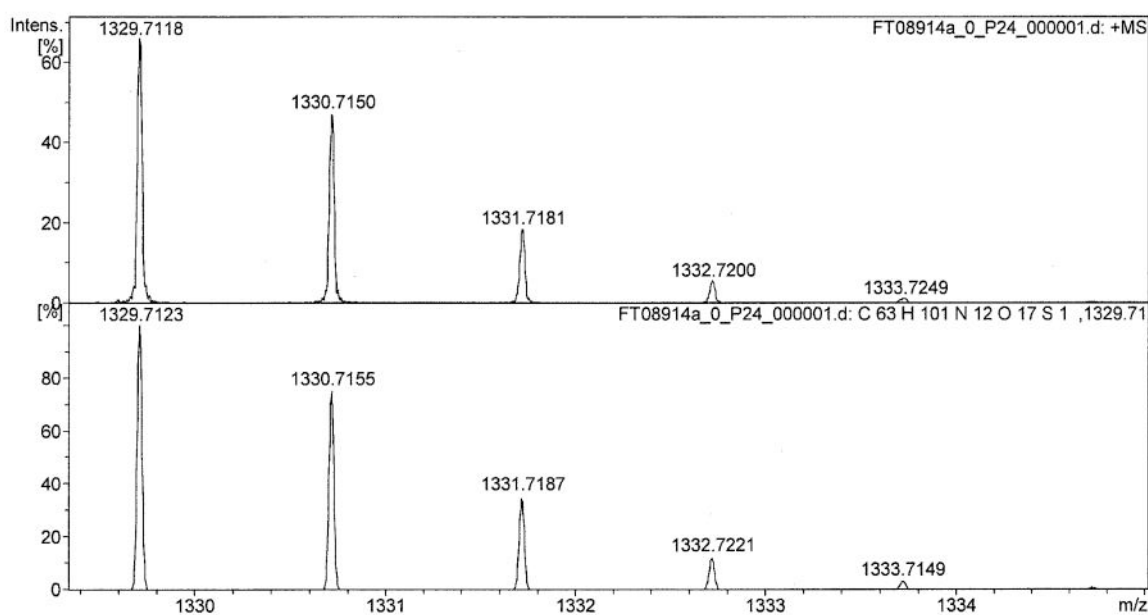





## Degradation product S56

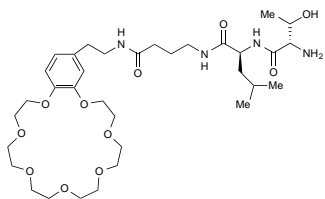

**Box 1:** Full scale spectra with internal reference peaks (Tunemix (pos) ESI-TOF Spezial 118.0863, 622.0290, 922.0098, 1221.9906); **Box 2:** Measured isotopic pattern of the product peak; **Box 3:** Calculated isotopic pattern of the product peak.

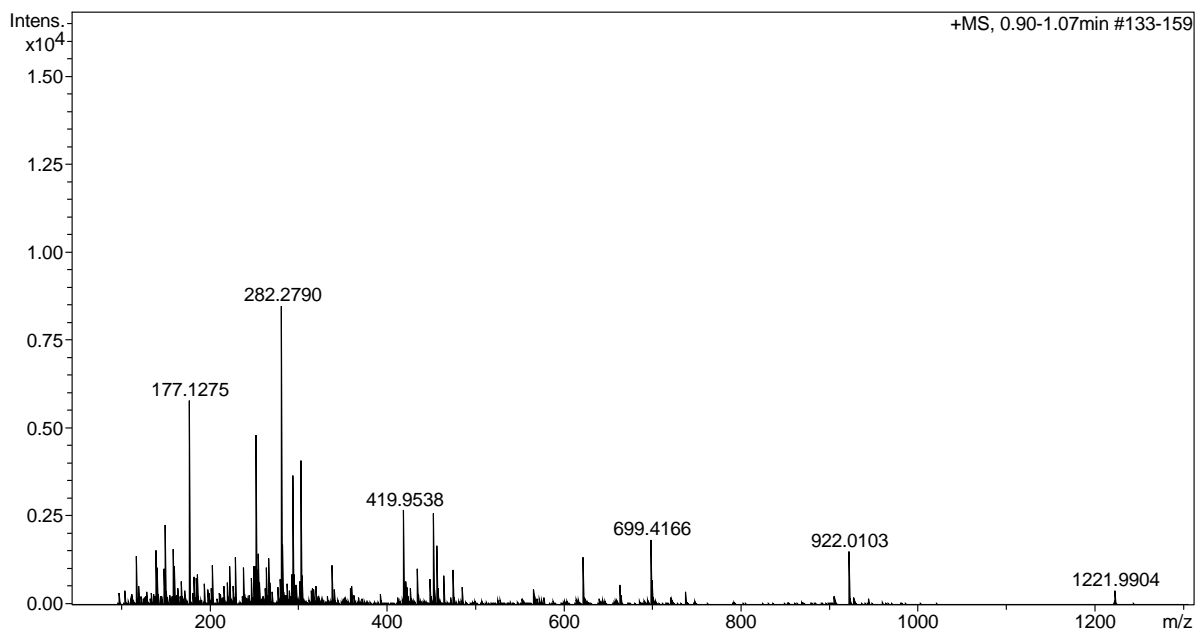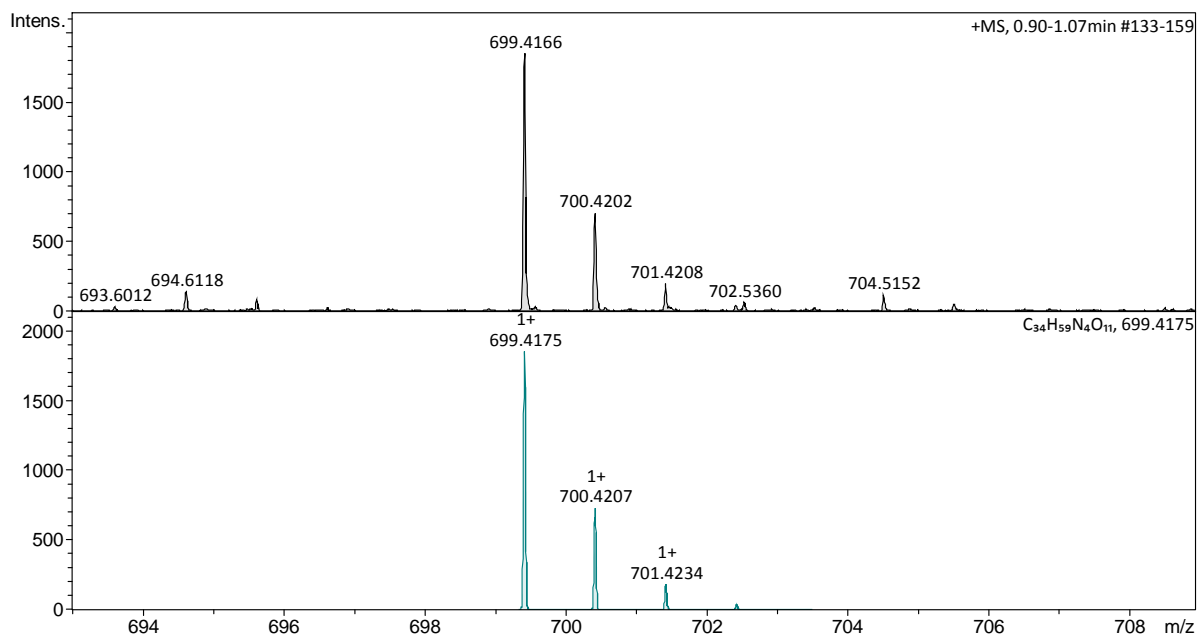

## Degradation product S57

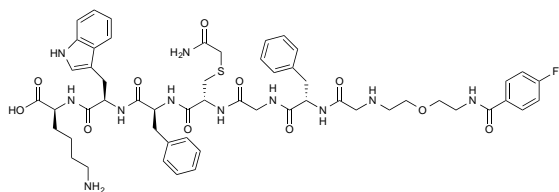

**Box 1:** Full scale spectra with internal reference peaks (ESI: Na-PFHA 408.9481, 794.9069, 1180.8657, 1566.8246); **Box 2:** Measured isotopic pattern of the product peak; **Box 3:** Calculated isotopic pattern of the product peak.

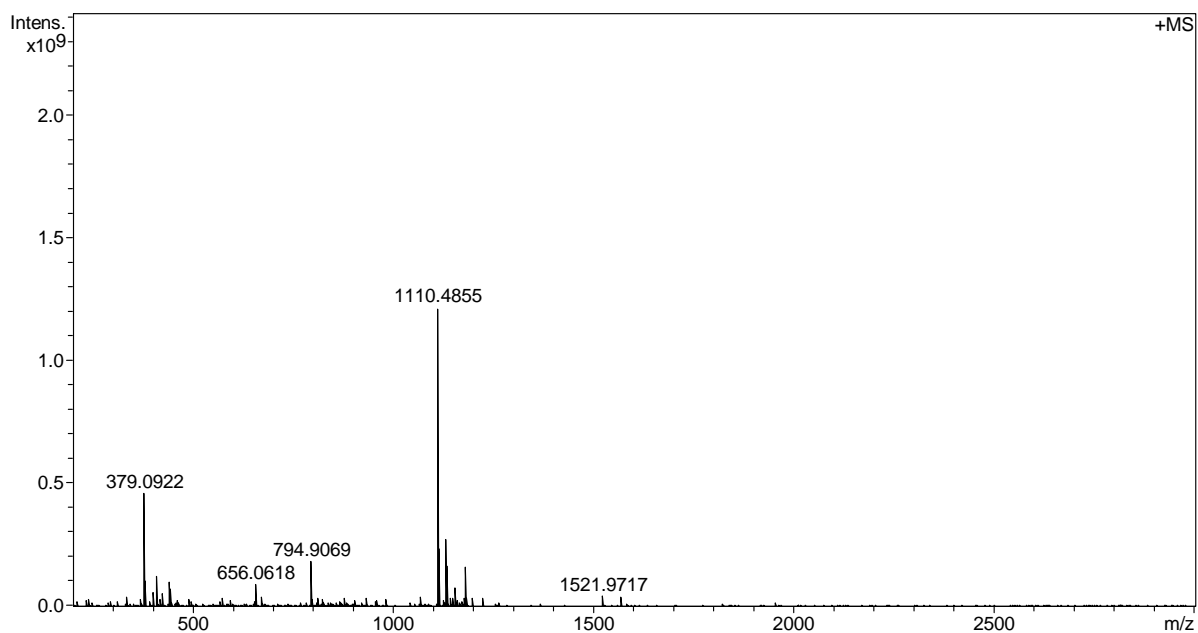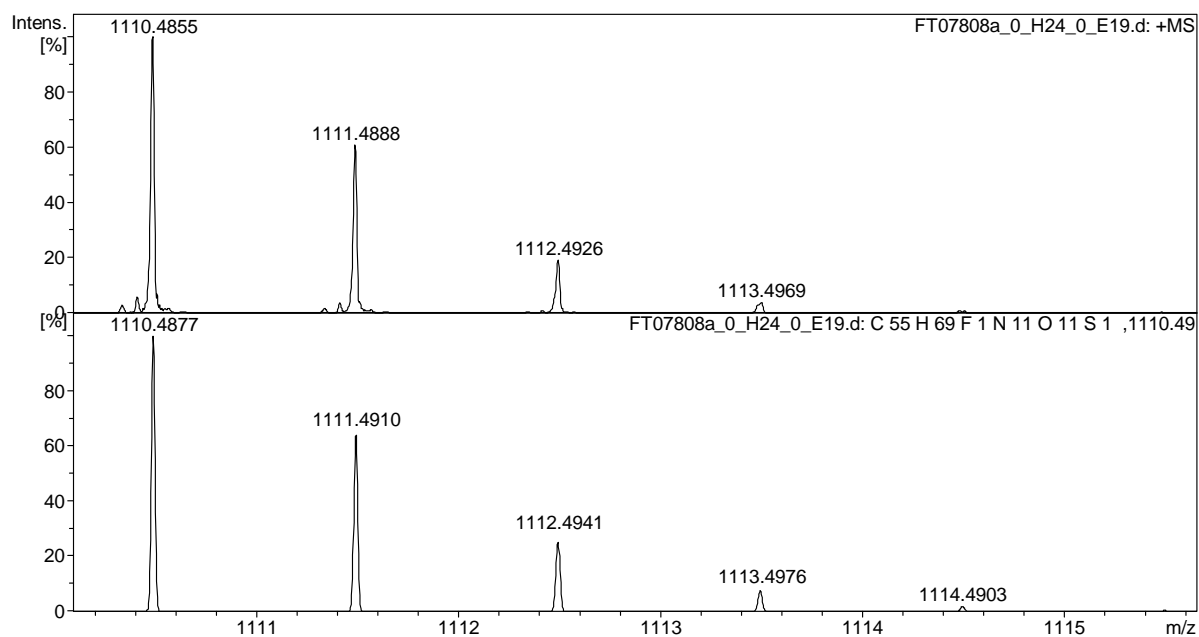

## Degradation product S58

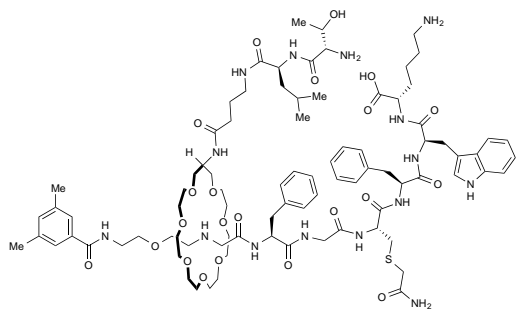

**Box 1:** Full scale spectra with internal reference peaks (ESI: Na-PFHA 408.9481, 794.9069, 1180.8657, 1566.8246, 1952.7834); **Box 2:** Measured isotopic pattern of the product peak; **Box 3:** Calculated isotopic pattern of the product peak.

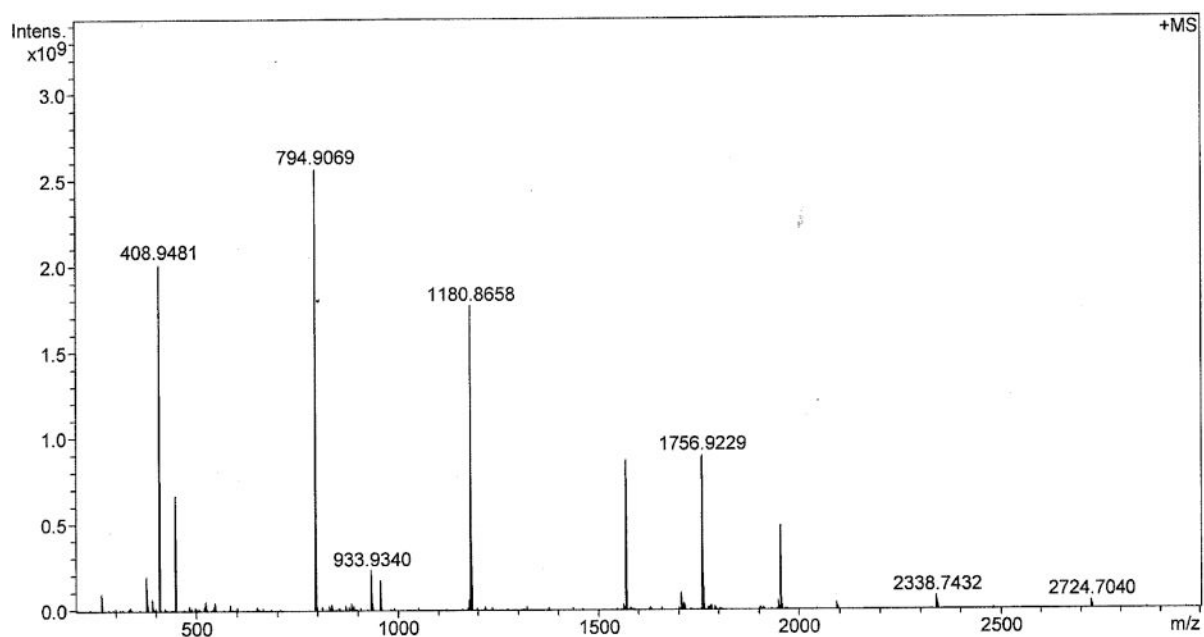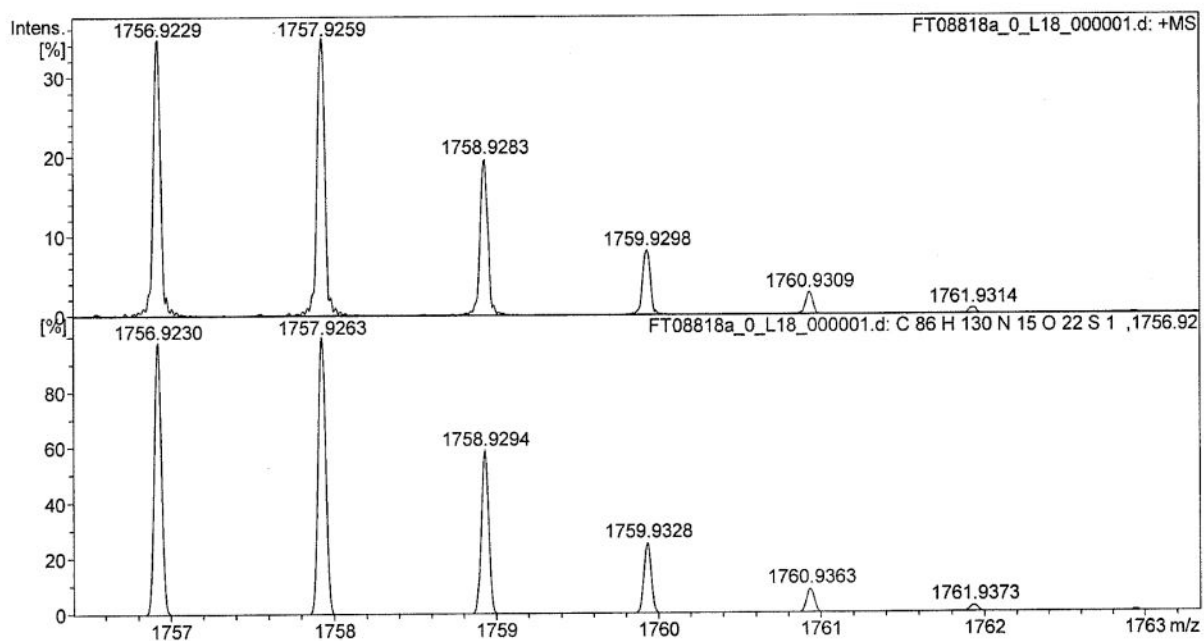











## Degradation product S63

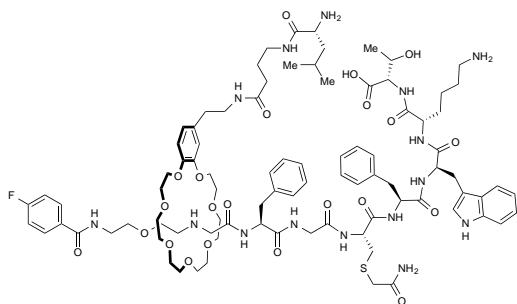

**Box 1:** Full scale spectra with internal reference peaks (ESI: Na-PFHA 408.9481, 794.9069, 1180.8657, 1566.8246, 1952.7834); **Box 2:** Measured isotopic pattern of the product peak; **Box 3:** Calculated isotopic pattern of the product peak.

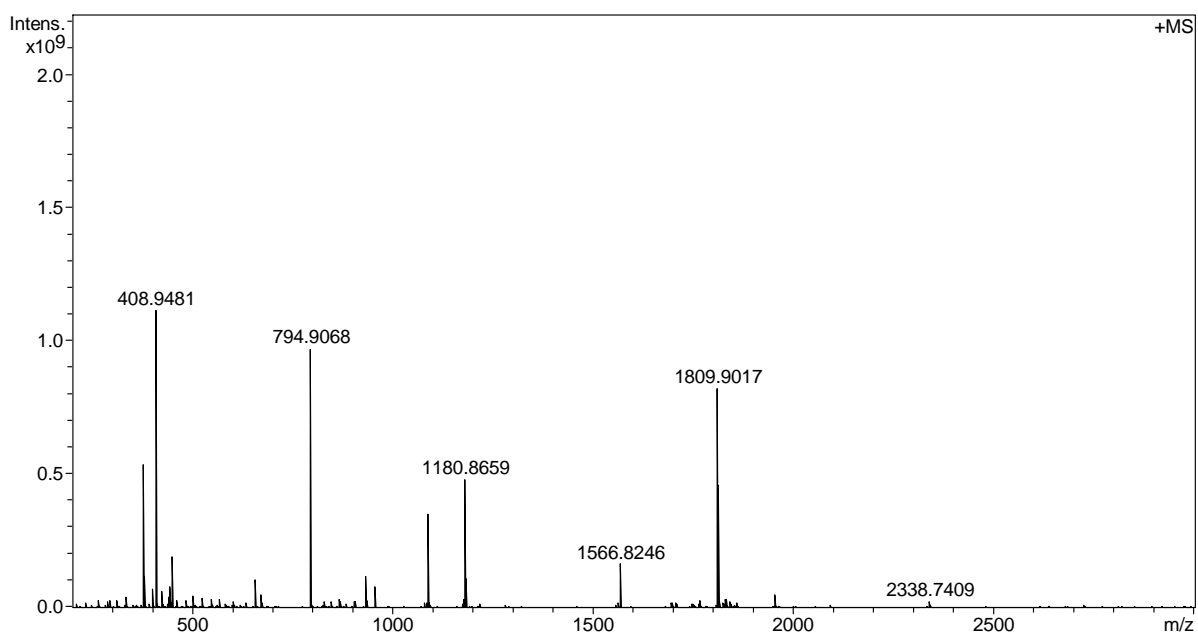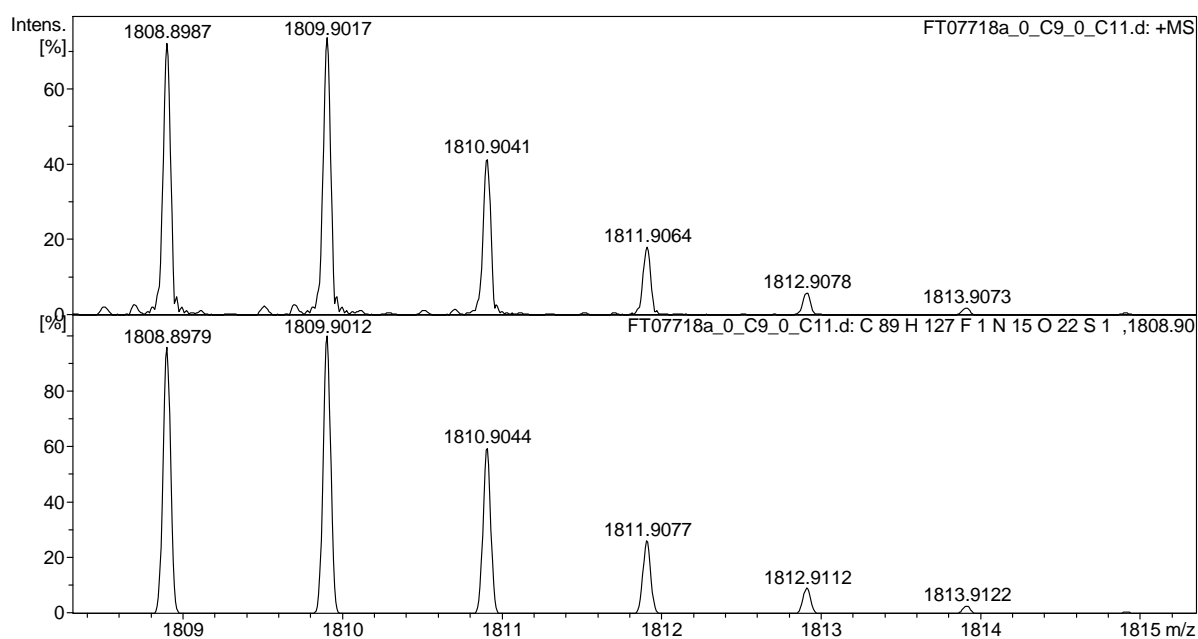

## Degradation product S64

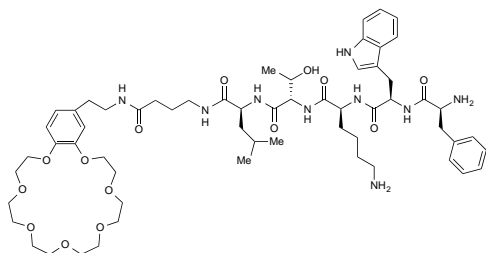

**Box 1:** Full scale spectra with internal reference peaks (ESI: Tuning Mix ES-TOF (ESI) (pos)DCTB 322.0481, 622.0290, 922.0098, 1221.9906, 1521.9715); **Box 2:** Measured isotopic pattern of the product peak; **Box 3:** Calculated isotopic pattern of the product peak.

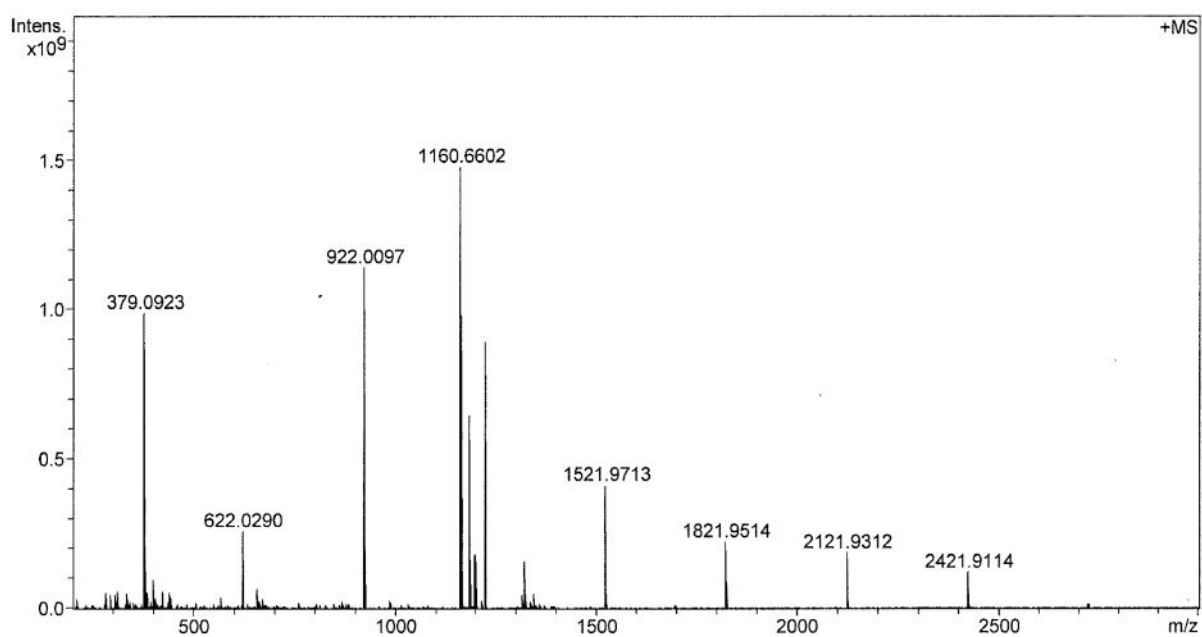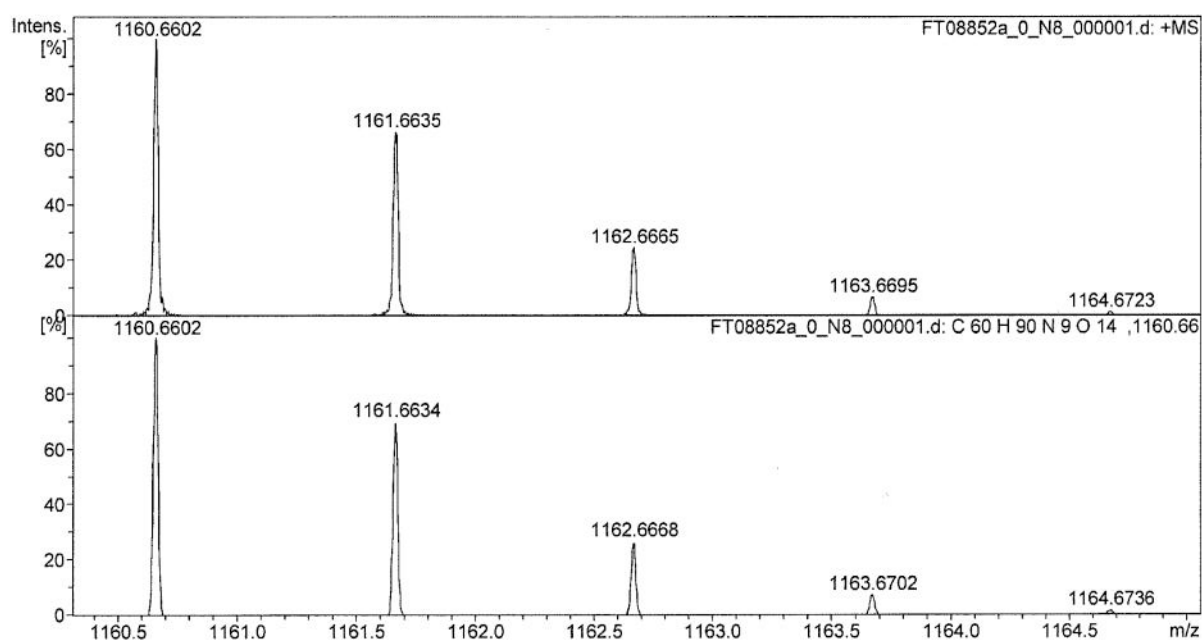

## Degradation product S65

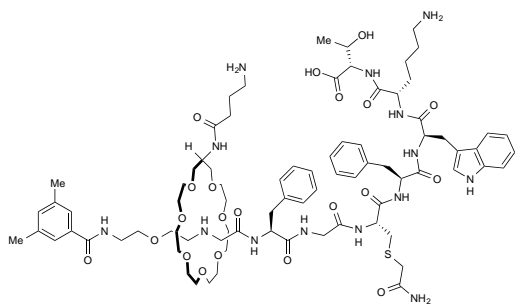

**Box 1:** Full scale spectra with internal reference peaks (ESI: Na-PFHA 408.9481, 794.9069, 1180.8657, 1566.8246, 1952.7834); **Box 2:** Measured isotopic pattern of the product peak; **Box 3:** Calculated isotopic pattern of the product peak.

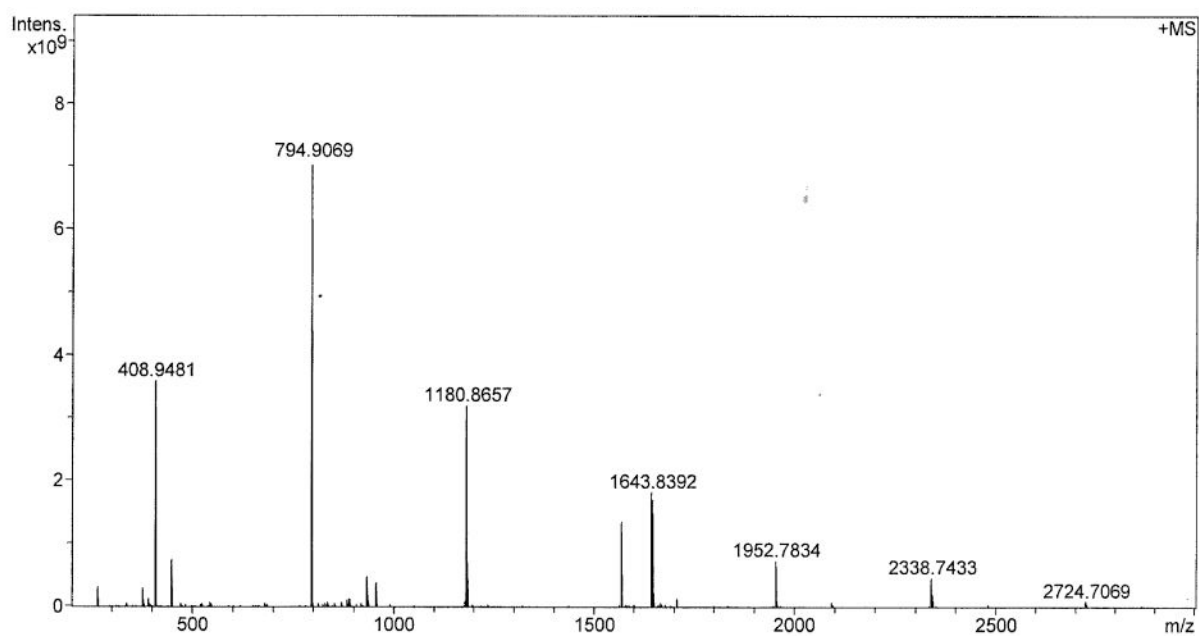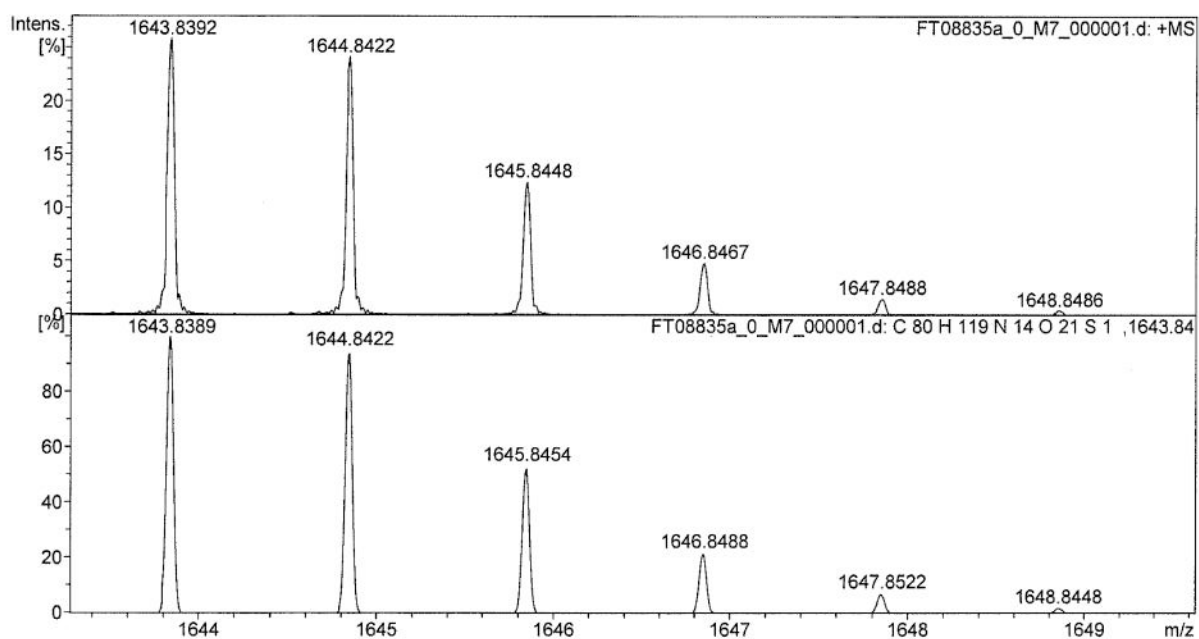



## Degradation product S67

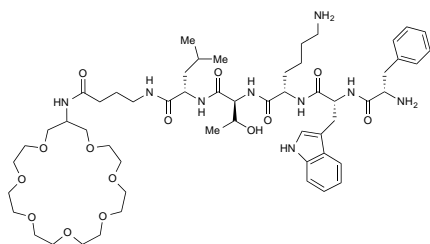

**Box 1:** Full scale spectra with internal reference peaks (ESI: Na-PFHA 408.9481, 794.9069, 1180.8657, 1566.8246, 1952.7834); **Box 2:** Measured isotopic pattern of the product peak; **Box 3:** Calculated isotopic pattern of the product peak.

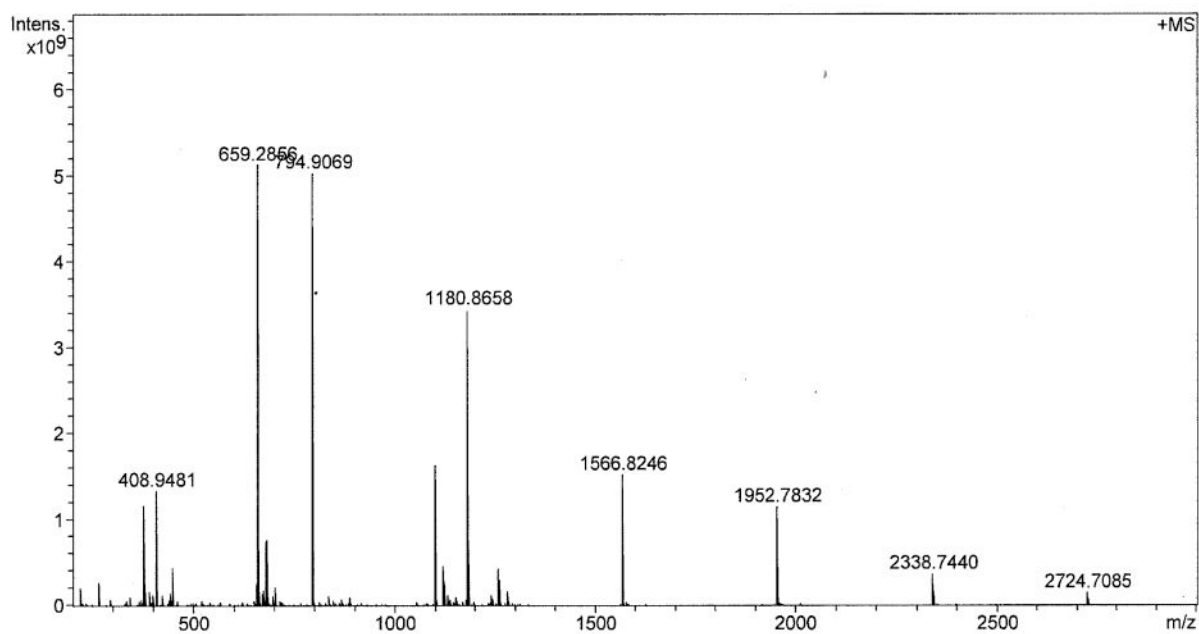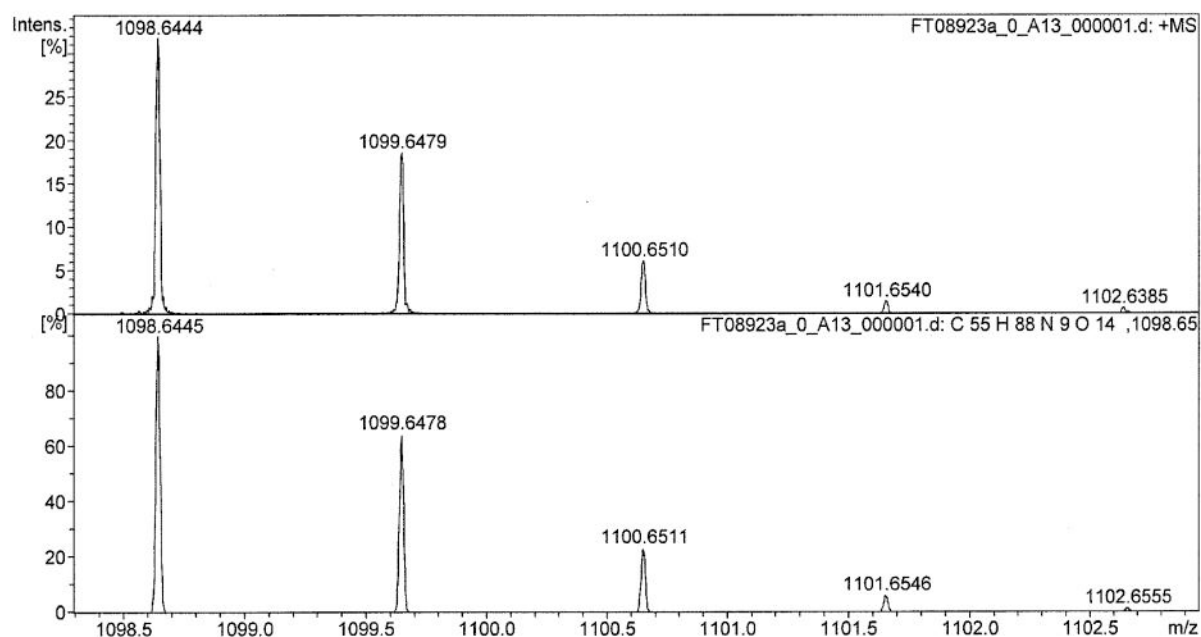





## Degradation product S69

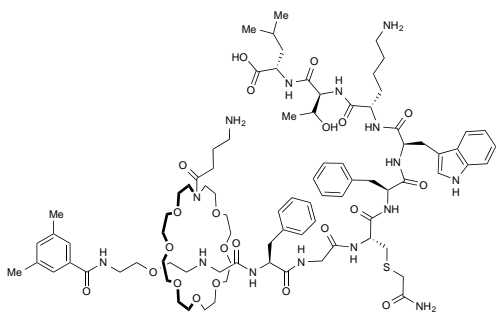

**Box 1:** Full scale spectra with internal reference peaks (ESI: Na-PFHA 408.9481, 794.9069, 1180.8657, 1566.8246, 2338.7423); **Box 2:** Measured isotopic pattern of the product peak; **Box 3:** Calculated isotopic pattern of the product peak.

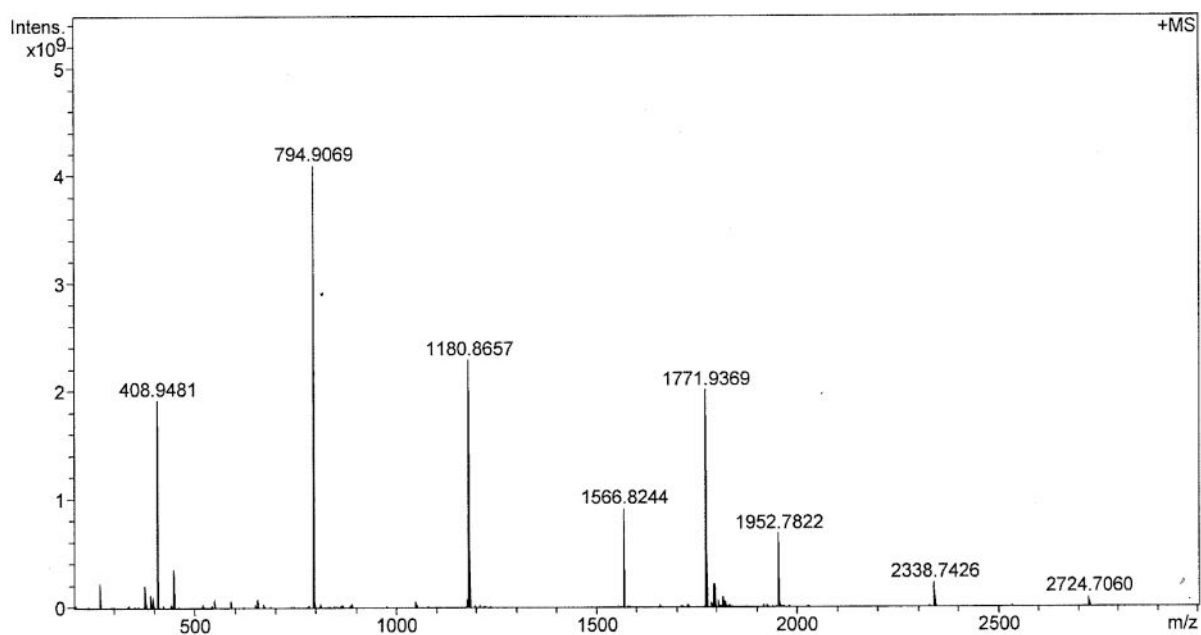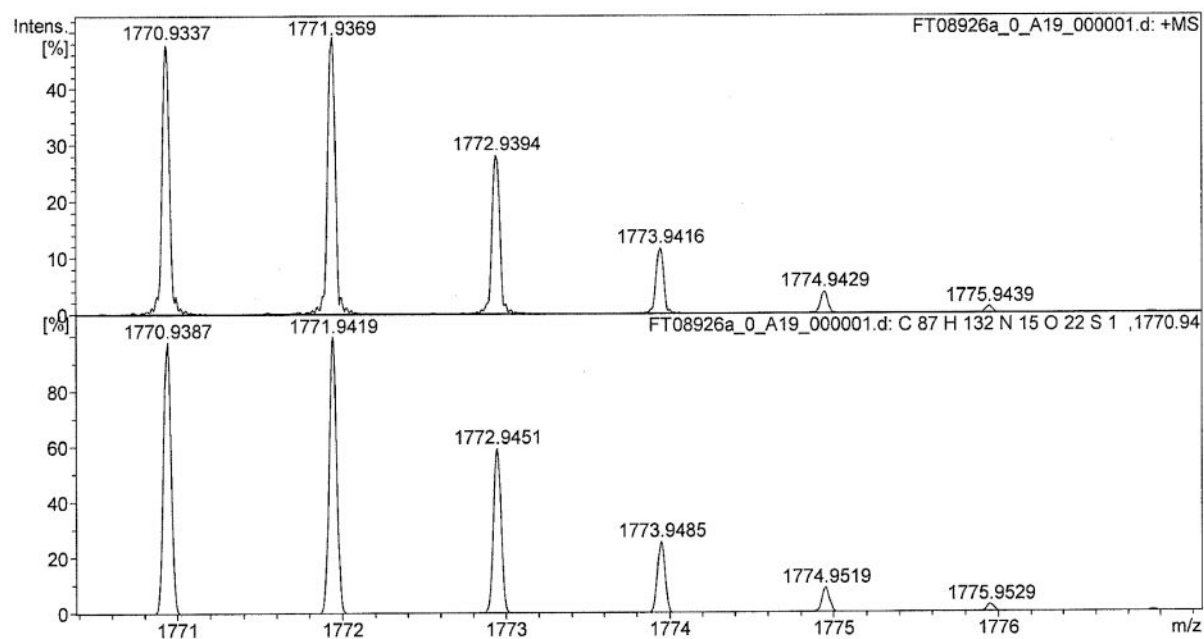







**Linear peptide  $\alpha$ -ketoacid S73**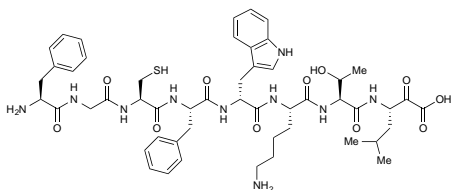

**Box 1:** Full scale spectra with internal reference peaks (ESI: Tuning Mix ES-TOF (ESI) (pos)DCTB 622.0290, 922.0098, 1221.9906, 1521.9715, 1821.9523, 2121.9332, 2421.9140); **Box 2:** Measured isotopic pattern of the product peak; **Box 3:** Calculated isotopic pattern of the product peak.

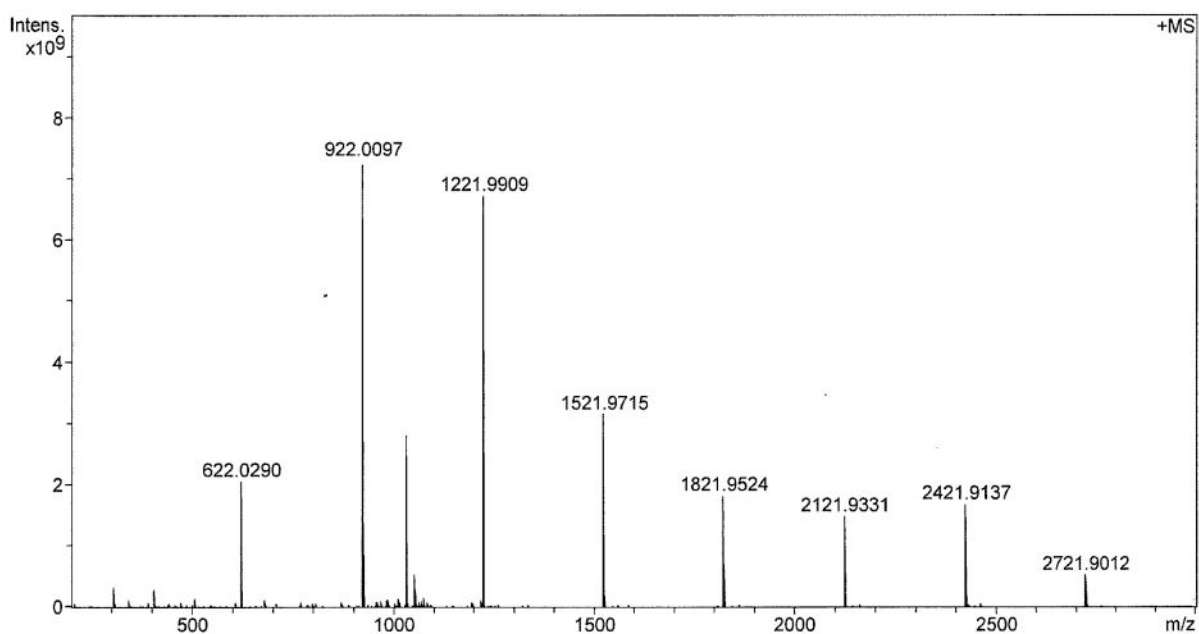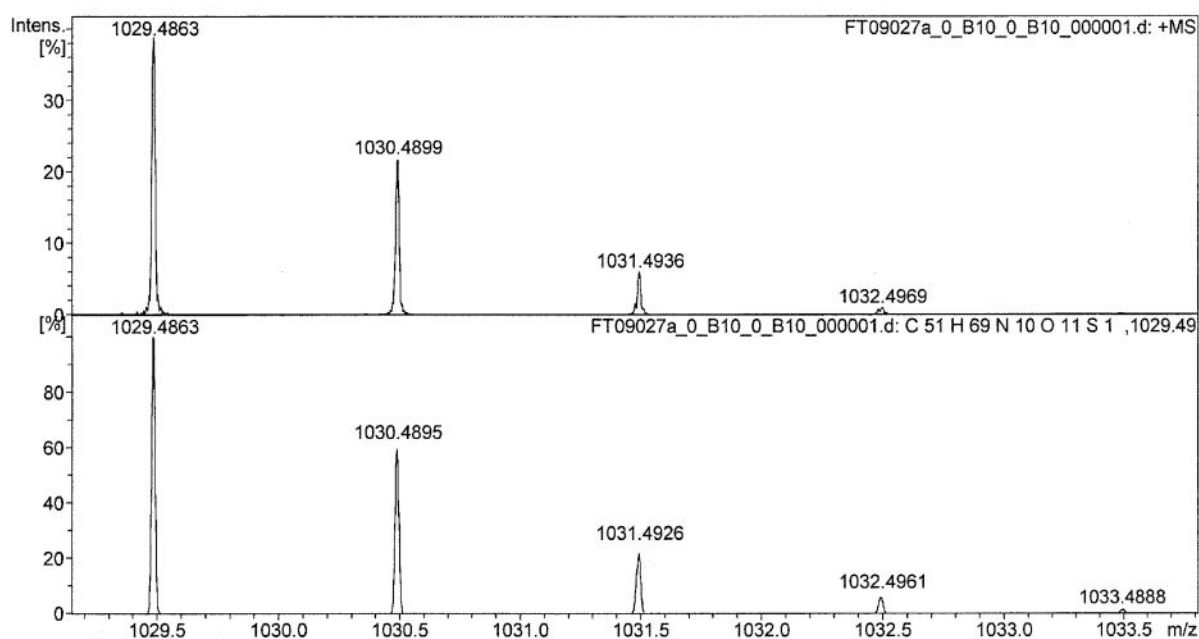

## Linear peptide R1

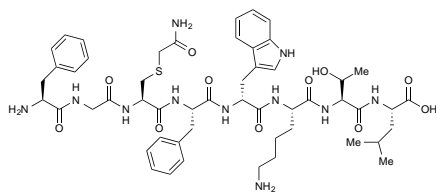

**Box 1:** Full scale spectra with internal reference peaks (ESI: Na-PFHA 408.9481, 794.9069, 1180.8657, 1566.8246, 1952.7834, 2338.7423); **Box 2:** Measured isotopic pattern of the product peak; **Box 3:** Calculated isotopic pattern of the product peak.

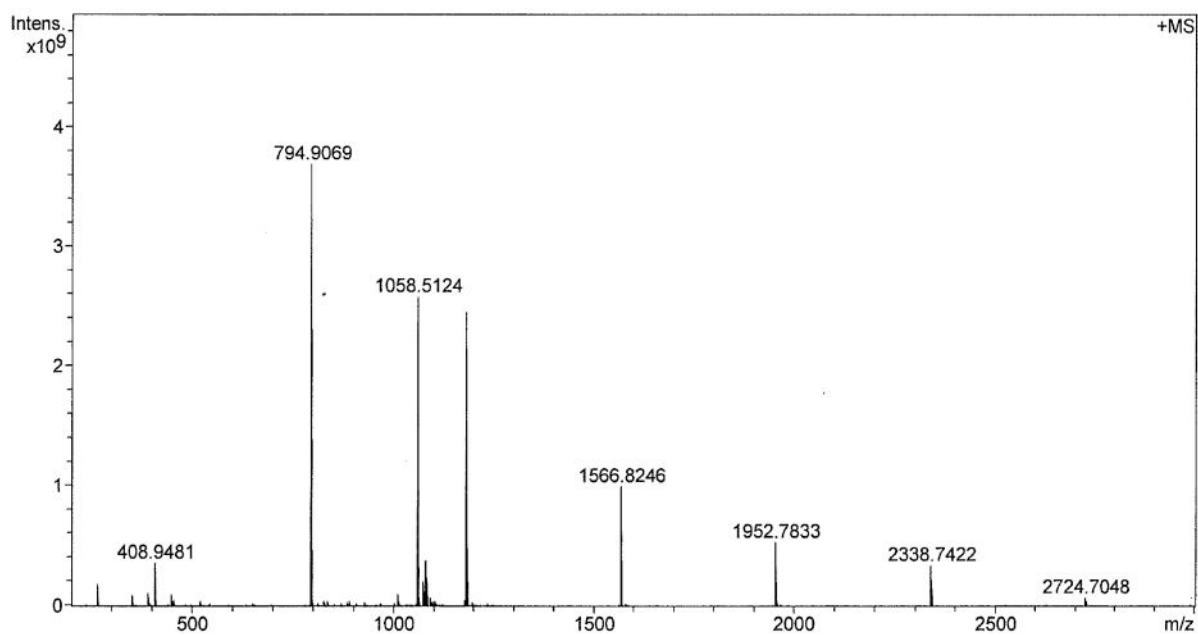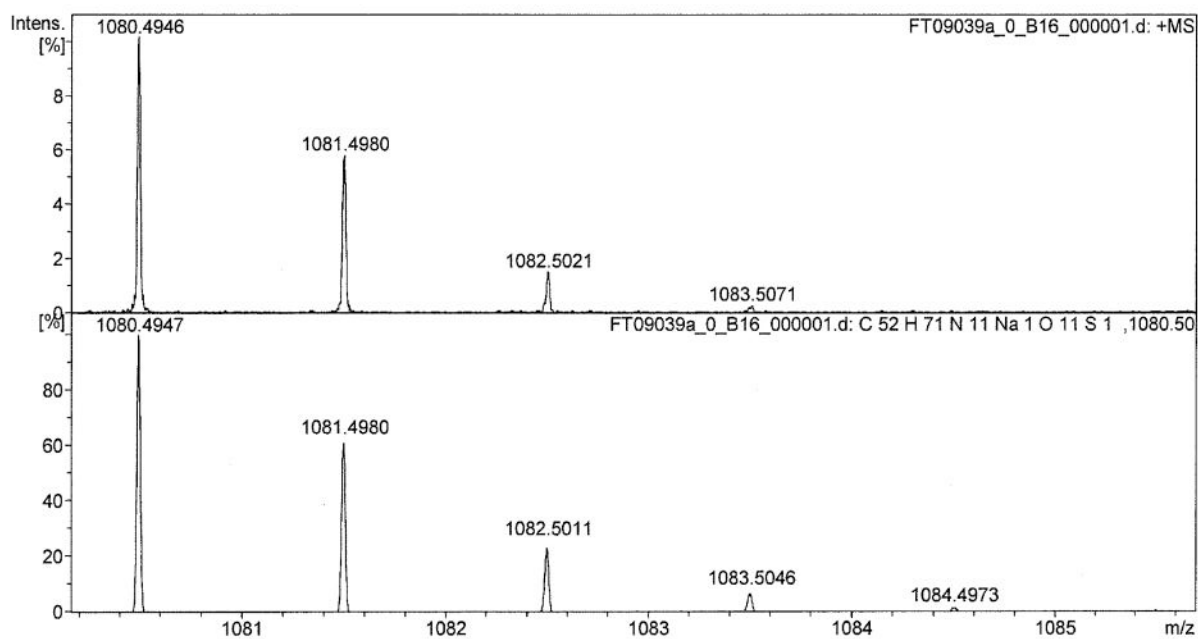

Supplement: SC-008-C7SC00021A-s001.pdf [file SC-008-C7SC00021A-s001.pdf]
